# Supplementary material for: Quantification and isotherm modelling of competitive phosphate and silicate adsorption onto micro-sized granular ferric hydroxide
Source: RSC Adv. 2019 Jul 30;9(41):23642–51. doi: 10.1039/c9ra04865k (PMC9069472; doi:10.1039/c9ra04865k)
Supplement: RA-009-C9RA04865K-s001 [file RA-009-C9RA04865K-s001.xlsx]

## Sheet: NLMI
Non-modified competitive Langmuir model
Daten														Model								MPSD
P					Langmuir		Si					Langmuir		P				Si						P	P	Si	Si
c0	ce	qe	ce	qe	qm	KL	c0	ce	qe	ce	qe	qm	KL	ce	qe	qm,P	KL,P	qm,Si	KL,Si	ce	qe			(q,exp-q,cal)/qexp^2		(q,exp-q,cal)/qexp^2
mg/L	µmol/L	µmol/g	mg/L	mg/g			mg/L	µmol/L	µmol/g	mg/L	mg/g											nm	np		MPSD		MPSD	MPSD,komp
4.973	115.194	335.006	3.571	10.3852	16.7	40	9.23	312.456	118.624	8.78	3.33333	28	0.6	3.571	15.998	16.7	40	28	0.6	8.78	0.989243	33	0	0.2921	0.403043	0.494528	0.402861	80.5903
4.973	70.5806	332.736	2.188	10.3148			9.23	298.007	112.825	8.374	3.17037			2.188	15.6245					8.374	1.50392			0.26498		0.27629
4.973	29.5161	290.896	0.915	9.01778			9.23	261.423	148.992	7.346	4.18667			0.915	14.5502					7.346	2.93787			0.376388		0.0889709
4.973	6.70968	243.984	0.208	7.56349			9.23	218.221	174.999	6.132	4.91746			0.208	10.6887					6.132	7.92492			0.170727		0.374039
5.102	115.548	363.202	3.582	11.2593			13.99	477.224	152.893	13.41	4.2963			3.582	15.7083					13.41	1.47899			0.156137		0.430012
5.102	73.2903	338.112	2.272	10.4815			13.99	442.705	204.297	12.44	5.74074			2.272	15.2772					12.44	2.10372			0.209343		0.40138
5.102	31.2903	296.201	0.97	9.18222			13.99	393.95	230.921	11.07	6.48889			0.97	13.952					11.07	4.00448			0.269839		0.146591
5.102	9.83871	245.622	0.305	7.61429			13.99	332.633	262.272	9.347	7.36984			0.305	10.8325					9.347	8.349			0.178638		0.0176517
5.116	109.226	413.381	3.386	12.8148			9.197	312.918	106.498	8.793	2.99259			3.386	15.9605					8.793	1.04238			0.0602549		0.424685
5.116	66.1613	366.189	2.051	11.3519			9.197	296.512	114.011	8.332	3.2037			2.051	15.562					8.332	1.58995			0.137552		0.25373
5.116	26.0645	308.817	0.808	9.57333			9.197	264.057	140.53	7.42	3.94889			0.808	14.2895					7.42	3.30022			0.242693		0.0269832
5.116	6.70968	251.306	0.208	7.79048			9.197	215.196	177.936	6.047	5			0.208	10.7308					6.047	7.84585			0.142446		0.323954
5.107	114.548	371.804	3.551	11.5259			14.05	474.377	189.798	13.33	5.33333			3.551	15.7051					13.33	1.4827			0.131471		0.521275
5.107	72.6129	341.219	2.251	10.5778			14.05	446.619	197.707	12.55	5.55556			2.251	15.2548					12.55	2.13899			0.195503		0.378203
5.107	32.0323	294.91	0.993	9.14222			14.05	394.306	234.875	11.08	6.6			0.993	14.0036					11.08	3.92974			0.282762		0.163689
5.107	9.22581	246.851	0.286	7.65238			14.05	333.132	264.87	9.361	7.44286			0.286	10.5805					9.361	8.70955			0.146415		0.0289642
4.864	116.032	302.748	3.597	9.38519			21.97	740.569	305.786	20.81	8.59259			3.597	15.2688					20.81	2.22162			0.393014		0.549747
4.864	81.3871	279.689	2.523	8.67037			21.97	688.256	346.646	19.34	9.74074			2.523	14.8459					19.34	2.86206			0.507307		0.498686
4.864	47.2903	243.584	1.466	7.55111			21.97	620.641	358.244	17.44	10.0667			1.466	13.9691					17.44	4.17939			0.722392		0.342025
4.864	16.5161	222.837	0.512	6.90794			21.97	543.772	377.902	15.28	10.619			0.512	11.1595					15.28	8.37588			0.37879		0.0446223
133.63	133.629	591.935	4.1425	18.35			0	0	0	0	0			4.1425	16.5998					0	0			0.0090969
133.63	109.952	550.255	3.4085	17.0579			0	0	0	0	0			3.4085	16.5784					0	0			0.00079015
133.63	81.3548	524.946	2.522	16.2733			0	0	0	0	0			2.522	16.5361					0	0			0.000260692
133.63	54.8871	460.732	1.7015	14.2827			0	0	0	0	0			1.7015	16.4582					0	0			0.0232003
133.63	13.8387	403.431	0.429	12.5063			0	0	0	0	0			0.429	15.7804					0	0			0.0685344
0	0	0	0	0			374.99	335.27	993.099	9.42109	27.9061			0	0					9.42109	23.7912					0.0217434
0	0	0	0	0			374.99	302.395	907.487	8.49731	25.5004			0	0					8.49731	23.4086					0.00672872
0	0	0	0	0			374.99	258.781	871.598	7.27175	24.4919			0	0					7.27175	22.7791					0.00489082
0	0	0	0	0			374.99	222.208	763.933	6.24403	21.4665			0	0					6.24403	22.1008					0.000873118
0	0	0	0	0			374.99	163.416	634.734	4.04	19.492			0	0					4.04	19.8224					0.000287357
0	0	0	0	0			374.99	121.158	507.672	2.89	15.2947			0	0					2.89	17.7586					0.0259522
0	0	0	0	0			374.99	57.5136	476.221	1.62	13.376			0	0					1.62	13.8012					0.00101055
0	0	0	0	0			374.99	29.0538	345.94	0.816412	9.72092			0	0					0.816412	9.20612					0.00280455

## Sheet: Lang2
Modified competitive Langmuir isotherm
Daten														Model										MPSD
P					Langmuir		Si					Langmuir		P						Si						P	P	Si	Si
c0	ce	qe	ce	qe	qm	KL	c0	ce	qe	ce	qe	qm	KL	ce	qe	qm,P	KL,P	η	η	qm,Si	KL,Si	ce	qe			(q,exp-q,cal)/qexp^2		(q,exp-q,cal)/qexp^2
µmol/L	µmol/L	µmol/g	mg/L	mg/g			µmol/L	µmol/L	µmol/g	mg/L	mg/g													nm	np		MPSD		MPSD	MPSD,komp
4.973	115.194	335.006	3.571	10.3852	16.7	40	9.23	312.456	118.624	8.78	3.33333	28	0.6	3.571	14.1379	16.7	40	12.6458	5.03153	28	0.6	8.78	2.1972	33	2	0.130575	0.212094	0.116173	0.397539	60.9633
4.973	70.5806	332.736	2.188	10.3148			9.23	298.007	112.825	8.374	3.17037			2.188	12.958							8.374	3.13476			0.0656662		0.00012617
4.973	29.5161	290.896	0.915	9.01778			9.23	261.423	148.992	7.346	4.18667			0.915	10.1324							7.346	5.14186			0.0152768		0.0520534
4.973	6.70968	243.984	0.208	7.56349			9.23	218.221	174.999	6.132	4.91746			0.208	4.59885							6.132	8.56973			0.153639		0.551626
5.102	115.548	363.202	3.582	11.2593			13.99	477.224	152.893	13.41	4.2963			3.582	13.5839							13.41	3.21445			0.0426277		0.0634073
5.102	73.2903	338.112	2.272	10.4815			13.99	442.705	204.297	12.44	5.74074			2.272	12.4111							12.44	4.29539			0.0338927		0.0633885
5.102	31.2903	296.201	0.97	9.18222			13.99	393.95	230.921	11.07	6.48889			0.97	9.50935							11.07	6.85972			0.00126924		0.00326597
5.102	9.83871	245.622	0.305	7.61429			13.99	332.633	262.272	9.347	7.36984			0.305	5.23202							9.347	10.1349			0.0978863		0.140769
5.116	109.226	413.381	3.386	12.8148			9.197	312.918	106.498	8.793	2.99259			3.386	14.0187							8.793	2.3011			0.008825		0.0533919
5.116	66.1613	366.189	2.051	11.3519			9.197	296.512	114.011	8.332	3.2037			2.051	12.7745							8.332	3.28025			0.0157055		0.000570832
5.116	26.0645	308.817	0.808	9.57333			9.197	264.057	140.53	7.42	3.94889			0.808	9.61167							7.42	5.57919			1.60344e-05		0.170445
5.116	6.70968	251.306	0.208	7.79048			9.197	215.196	177.936	6.047	5			0.208	4.61844							6.047	8.48695			0.165786		0.486352
5.107	114.548	371.804	3.551	11.5259			14.05	474.377	189.798	13.33	5.33333			3.551	13.5712							13.33	3.22015			0.0314875		0.156991
5.107	72.6129	341.219	2.251	10.5778			14.05	446.619	197.707	12.55	5.55556			2.251	12.3646							12.55	4.35739			0.0285336		0.0465133
5.107	32.0323	294.91	0.993	9.14222			14.05	394.306	234.875	11.08	6.6			0.993	9.60305							11.08	6.77297			0.00254079		0.000686843
5.107	9.22581	246.851	0.286	7.65238			14.05	333.132	264.87	9.361	7.44286			0.286	5.00098							9.361	10.3464			0.120048		0.152192
4.864	116.032	302.748	3.597	9.38519			21.97	740.569	305.786	20.81	8.59259			3.597	12.7872							20.81	4.67611			0.131394		0.207751
4.864	81.3871	279.689	2.523	8.67037			21.97	688.256	346.646	19.34	9.74074			2.523	11.808							19.34	5.72132			0.130959		0.170272
4.864	47.2903	243.584	1.466	7.55111			21.97	620.641	358.244	17.44	10.0667			1.466	10.0352							17.44	7.54604			0.108223		0.062697
4.864	16.5161	222.837	0.512	6.90794			21.97	543.772	377.902	15.28	10.619			0.512	6.08917							15.28	11.4866			0.0140481		0.0066745
133.63	133.629	591.935	4.1425	18.35			0	0	0	0	0			4.1425	15.5159							0	0			0.0238544
133.63	109.952	550.255	3.4085	17.0579			0	0	0	0	0			3.4085	15.2825							0	0			0.0108326
133.63	81.3548	524.946	2.522	16.2733			0	0	0	0	0			2.522	14.8398							0	0			0.00776042
133.63	54.8871	460.732	1.7015	14.2827			0	0	0	0	0			1.7015	14.0833							0	0			0.000194944
133.63	13.8387	403.431	0.429	12.5063			0	0	0	0	0			0.429	9.61464							0	0			0.0534625
0	0	0	0	0			374.99	335.27	993.099	9.42109	27.9061			0	0							9.42109	14.8139					0.220103
0	0	0	0	0			374.99	302.395	907.487	8.49731	25.5004			0	0							8.49731	14.0924					0.200136
0	0	0	0	0			374.99	258.781	871.598	7.27175	24.4919			0	0							7.27175	13.0038					0.220014
0	0	0	0	0			374.99	222.208	763.933	6.24403	21.4665			0	0							6.24403	11.9504					0.196516
0	0	0	0	0			374.99	163.416	634.734	4.04	19.492			0	0							4.04	9.10358					0.284045
0	0	0	0	0			374.99	121.158	507.672	2.89	15.2947			0	0							2.89	7.17638					0.28174
0	0	0	0	0			374.99	57.5136	476.221	1.62	13.376			0	0							1.62	4.53334					0.437033
0	0	0	0	0			374.99	29.0538	345.94	0.816412	9.72092			0	0							0.816412	2.48411					0.554216

## Sheet: Lang2batch
Starting values modelling
	η	η		η	η
irun			MPSD
1	0.128	0.128	72.2874	13.8344	4.58889
2	0.128	0.156	72.2874	13.8344	4.58889
3	0.128	0.184	72.2874	13.8344	4.58889
4	0.128	0.212	72.2874	13.8344	4.5889
5	0.128	0.24	72.2874	13.8344	4.5889
6	0.128	0.268	72.2874	13.8344	4.58889
7	0.128	0.296	72.2874	13.8344	4.5889
8	0.128	0.324	72.2874	13.8344	4.5889
9	0.128	0.352	72.2874	13.8344	4.5889
10	0.128	0.38	72.2874	13.8344	4.5889
11	0.128	0.408	72.2874	13.8344	4.5889
12	0.128	0.436	72.2874	13.8344	4.5889
13	0.128	0.464	72.2874	13.8344	4.5889
14	0.128	0.492	72.2874	13.8344	4.5889
15	0.128	0.52	72.2874	13.8344	4.58889
16	0.128	0.548	72.2874	13.8344	4.58889
17	0.128	0.576	72.2874	13.8344	4.58889
18	0.128	0.604	72.2874	13.8344	4.58889
19	0.128	0.632	72.2874	13.8345	4.5889
	0.128	0.66	72.2874	13.8344	4.58889
	0.128	0.688	72.2874	13.8345	4.5889
	0.128	0.716	72.2874	13.8344	4.5889
	0.128	0.744	72.2874	13.8344	4.5889
	0.128	0.772	72.2874	13.8344	4.58889
	0.128	0.8	72.2874	13.8345	4.5889
	0.128	0.828	72.2874	13.8344	4.58889
	0.128	0.856	72.2874	13.8344	4.58889
	0.128	0.884	72.2874	13.8344	4.58889
	0.128	0.912	72.2874	13.8344	4.5889
	0.128	0.94	72.2874	13.8344	4.5889
	0.128	0.968	72.2874	13.8344	4.5889
	0.128	0.996	72.2874	13.8344	4.58889
	0.128	1.024	72.2874	13.8344	4.5889
	0.128	1.052	72.2874	13.8345	4.5889
	0.128	1.08	72.2874	13.8345	4.5889
	0.128	1.108	72.2874	13.8344	4.58889
	0.128	1.136	72.2874	13.8344	4.5889
	0.128	1.164	72.2874	13.8345	4.5889
	0.128	1.192	72.2874	13.8344	4.58889
	0.128	1.22	72.2874	13.8344	4.58889
	0.128	1.248	72.2874	13.8344	4.5889
	0.128	1.276	72.2874	13.8344	4.5889
	0.128	1.304	72.2874	13.8344	4.5889
	0.128	1.332	72.2874	13.8344	4.5889
	0.128	1.36	72.2874	13.8344	4.58889
	0.128	1.388	72.2874	13.8344	4.58889
	0.128	1.416	72.2874	13.8344	4.5889
	0.128	1.444	72.2874	13.8344	4.5889
	0.128	1.472	72.2874	13.8344	4.5889
	0.128	1.5	72.2874	13.8344	4.58889
	0.156	0.128	72.2874	13.8345	4.5889
	0.156	0.156	72.2874	13.8345	4.5889
	0.156	0.184	72.2874	13.8344	4.58889
	0.156	0.212	72.2874	13.8344	4.5889
	0.156	0.24	72.2874	13.8344	4.5889
	0.156	0.268	72.2874	13.8344	4.5889
	0.156	0.296	72.2874	13.8344	4.5889
	0.156	0.324	72.2874	13.8344	4.58889
	0.156	0.352	72.2874	13.8344	4.5889
	0.156	0.38	72.2874	13.8344	4.5889
	0.156	0.408	72.2874	13.8344	4.5889
	0.156	0.436	72.2874	13.8344	4.58889
	0.156	0.464	72.2874	13.8344	4.5889
	0.156	0.492	72.2874	13.8344	4.5889
	0.156	0.52	72.2874	13.8344	4.5889
	0.156	0.548	72.2874	13.8344	4.5889
	0.156	0.576	72.2874	13.8344	4.58889
	0.156	0.604	72.2874	13.8344	4.5889
	0.156	0.632	72.2874	13.8344	4.58889
	0.156	0.66	72.2874	13.8344	4.58889
	0.156	0.688	72.2874	13.8344	4.58889
	0.156	0.716	72.2874	13.8344	4.58889
	0.156	0.744	72.2874	13.8344	4.58889
	0.156	0.772	72.2874	13.8344	4.58889
	0.156	0.8	72.2874	13.8344	4.5889
	0.156	0.828	72.2874	13.8345	4.5889
	0.156	0.856	72.2874	13.8344	4.5889
	0.156	0.884	72.2874	13.8344	4.58889
	0.156	0.912	72.2874	13.8344	4.58889
	0.156	0.94	72.2874	13.8344	4.58889
	0.156	0.968	72.2874	13.8344	4.58889
	0.156	0.996	72.2874	13.8344	4.5889
	0.156	1.024	72.2874	13.8344	4.58889
	0.156	1.052	72.2874	13.8344	4.5889
	0.156	1.08	72.2874	13.8344	4.58889
	0.156	1.108	72.2874	13.8344	4.58889
	0.156	1.136	72.2874	13.8344	4.58889
	0.156	1.164	72.2874	13.8344	4.5889
	0.156	1.192	72.2874	13.8344	4.5889
	0.156	1.22	72.2874	13.8345	4.5889
	0.156	1.248	72.2874	13.8344	4.58889
	0.156	1.276	72.2874	13.8344	4.5889
	0.156	1.304	72.2874	13.8344	4.5889
	0.156	1.332	72.2874	13.8344	4.5889
	0.156	1.36	72.2874	13.8344	4.58889
	0.156	1.388	72.2874	13.8344	4.5889
	0.156	1.416	72.2874	13.8344	4.5889
	0.156	1.444	72.2874	13.8344	4.5889
	0.156	1.472	72.2874	13.8344	4.5889
	0.156	1.5	72.2874	13.8344	4.58889
	0.184	0.128	72.2874	13.8344	4.5889
	0.184	0.156	72.2874	13.8344	4.5889
	0.184	0.184	72.2874	13.8345	4.5889
	0.184	0.212	72.2874	13.8344	4.58889
	0.184	0.24	72.2874	13.8344	4.58889
	0.184	0.268	72.2874	13.8344	4.58889
	0.184	0.296	72.2874	13.8344	4.5889
	0.184	0.324	72.2874	13.8344	4.58889
	0.184	0.352	72.2874	13.8344	4.58889
	0.184	0.38	72.2874	13.8344	4.5889
	0.184	0.408	72.2874	13.8344	4.5889
	0.184	0.436	72.2874	13.8344	4.5889
	0.184	0.464	72.2874	13.8344	4.5889
	0.184	0.492	72.2874	13.8345	4.5889
	0.184	0.52	72.2874	13.8344	4.5889
	0.184	0.548	72.2874	13.8344	4.58889
	0.184	0.576	72.2874	13.8344	4.5889
	0.184	0.604	72.2874	13.8344	4.58889
	0.184	0.632	72.2874	13.8344	4.5889
	0.184	0.66	72.2874	13.8345	4.5889
	0.184	0.688	72.2874	13.8345	4.5889
	0.184	0.716	72.2874	13.8344	4.5889
	0.184	0.744	72.2874	13.8344	4.58889
	0.184	0.772	72.2874	13.8344	4.58889
	0.184	0.8	72.2874	13.8344	4.5889
	0.184	0.828	72.2874	13.8344	4.58889
	0.184	0.856	72.2874	13.8344	4.58889
	0.184	0.884	72.2874	13.8344	4.5889
	0.184	0.912	72.2874	13.8344	4.58889
	0.184	0.94	72.2874	13.8344	4.5889
	0.184	0.968	72.2874	13.8344	4.5889
	0.184	0.996	72.2874	13.8344	4.58889
	0.184	1.024	72.2874	13.8345	4.5889
	0.184	1.052	72.2874	13.8344	4.58889
	0.184	1.08	72.2874	13.8344	4.5889
	0.184	1.108	72.2874	13.8344	4.5889
	0.184	1.136	72.2874	13.8344	4.5889
	0.184	1.164	72.2874	13.8344	4.58889
	0.184	1.192	72.2874	13.8344	4.58889
	0.184	1.22	72.2874	13.8344	4.58889
	0.184	1.248	72.2874	13.8344	4.5889
	0.184	1.276	72.2874	13.8344	4.5889
	0.184	1.304	72.2874	13.8344	4.5889
	0.184	1.332	72.2874	13.8344	4.5889
	0.184	1.36	72.2874	13.8344	4.58889
	0.184	1.388	72.2874	13.8344	4.58889
	0.184	1.416	72.2874	13.8344	4.58889
	0.184	1.444	72.2874	13.8344	4.5889
	0.184	1.472	72.2874	13.8344	4.5889
	0.184	1.5	72.2874	13.8344	4.58889
	0.212	0.128	72.2874	13.8344	4.5889
	0.212	0.156	72.2874	13.8344	4.5889
	0.212	0.184	72.2874	13.8345	4.5889
	0.212	0.212	72.2874	13.8344	4.5889
	0.212	0.24	72.2874	13.8344	4.5889
	0.212	0.268	72.2874	13.8344	4.58889
	0.212	0.296	72.2874	13.8345	4.5889
	0.212	0.324	72.2874	13.8345	4.5889
	0.212	0.352	72.2874	13.8345	4.5889
	0.212	0.38	72.2874	13.8344	4.58889
	0.212	0.408	72.2874	13.8344	4.5889
	0.212	0.436	72.2874	13.8345	4.5889
	0.212	0.464	72.2874	13.8344	4.5889
	0.212	0.492	72.2874	13.8345	4.5889
	0.212	0.52	72.2874	13.8344	4.58889
	0.212	0.548	72.2874	13.8344	4.5889
	0.212	0.576	72.2874	13.8344	4.5889
	0.212	0.604	72.2874	13.8344	4.5889
	0.212	0.632	72.2874	13.8344	4.58889
	0.212	0.66	72.2874	13.8344	4.5889
	0.212	0.688	72.2874	13.8345	4.5889
	0.212	0.716	72.2874	13.8344	4.5889
	0.212	0.744	72.2874	13.8344	4.58889
	0.212	0.772	72.2874	13.8345	4.5889
	0.212	0.8	72.2874	13.8344	4.5889
	0.212	0.828	72.2874	13.8344	4.5889
	0.212	0.856	72.2874	13.8345	4.5889
	0.212	0.884	72.2874	13.8344	4.58889
	0.212	0.912	72.2874	13.8344	4.5889
	0.212	0.94	72.2874	13.8345	4.5889
	0.212	0.968	72.2874	13.8344	4.58889
	0.212	0.996	72.2874	13.8344	4.58889
	0.212	1.024	72.2874	13.8344	4.5889
	0.212	1.052	72.2874	13.8344	4.5889
	0.212	1.08	72.2874	13.8344	4.5889
	0.212	1.108	72.2874	13.8344	4.5889
	0.212	1.136	72.2874	13.8344	4.5889
	0.212	1.164	72.2874	13.8345	4.5889
	0.212	1.192	72.2874	13.8345	4.5889
	0.212	1.22	72.2874	13.8345	4.5889
	0.212	1.248	72.2874	13.8344	4.5889
	0.212	1.276	72.2874	13.8345	4.5889
	0.212	1.304	72.2874	13.8344	4.58889
	0.212	1.332	72.2874	13.8345	4.5889
	0.212	1.36	72.2874	13.8344	4.58889
	0.212	1.388	72.2874	13.8345	4.5889
	0.212	1.416	72.2874	13.8344	4.58889
	0.212	1.444	72.2874	13.8344	4.58889
	0.212	1.472	72.2874	13.8344	4.58889
	0.212	1.5	72.2874	13.8344	4.58889
	0.24	0.128	72.2874	13.8344	4.5889
	0.24	0.156	72.2874	13.8344	4.58889
	0.24	0.184	72.2874	13.8344	4.58889
	0.24	0.212	72.2874	13.8344	4.5889
	0.24	0.24	72.2874	13.8345	4.5889
	0.24	0.268	72.2874	13.8344	4.5889
	0.24	0.296	72.2874	13.8344	4.58889
	0.24	0.324	72.2874	13.8344	4.58889
	0.24	0.352	72.2874	13.8344	4.5889
	0.24	0.38	72.2874	13.8344	4.58889
	0.24	0.408	72.2874	13.8344	4.58889
	0.24	0.436	72.2874	13.8345	4.5889
	0.24	0.464	72.2874	13.8344	4.58889
	0.24	0.492	72.2874	13.8344	4.5889
	0.24	0.52	72.2874	13.8344	4.5889
	0.24	0.548	72.2874	13.8345	4.5889
	0.24	0.576	72.2874	13.8344	4.58889
	0.24	0.604	72.2874	13.8344	4.58889
	0.24	0.632	72.2874	13.8344	4.58889
	0.24	0.66	72.2874	13.8344	4.58889
	0.24	0.688	72.2874	13.8344	4.58889
	0.24	0.716	72.2874	13.8344	4.58889
	0.24	0.744	72.2874	13.8344	4.5889
	0.24	0.772	72.2874	13.8344	4.5889
	0.24	0.8	72.2874	13.8344	4.5889
	0.24	0.828	72.2874	13.8344	4.5889
	0.24	0.856	72.2874	13.8345	4.5889
	0.24	0.884	72.2874	13.8344	4.58889
	0.24	0.912	72.2874	13.8344	4.5889
	0.24	0.94	72.2874	13.8344	4.5889
	0.24	0.968	72.2874	13.8345	4.5889
	0.24	0.996	72.2874	13.8345	4.5889
	0.24	1.024	72.2874	13.8345	4.5889
	0.24	1.052	72.2874	13.8344	4.5889
	0.24	1.08	72.2874	13.8344	4.58889
	0.24	1.108	72.2874	13.8344	4.58889
	0.24	1.136	72.2874	13.8345	4.5889
	0.24	1.164	72.2874	13.8344	4.5889
	0.24	1.192	72.2874	13.8344	4.5889
	0.24	1.22	72.2874	13.8344	4.5889
	0.24	1.248	72.2874	13.8344	4.5889
	0.24	1.276	72.2874	13.8344	4.58889
	0.24	1.304	72.2874	13.8344	4.5889
	0.24	1.332	72.2874	13.8344	4.5889
	0.24	1.36	72.2874	13.8344	4.5889
	0.24	1.388	72.2874	13.8344	4.5889
	0.24	1.416	72.2874	13.8344	4.5889
	0.24	1.444	72.2874	13.8344	4.58889
	0.24	1.472	72.2874	13.8344	4.5889
	0.24	1.5	72.2874	13.8344	4.5889
	0.268	0.128	72.2874	13.8344	4.5889
	0.268	0.156	72.2874	13.8344	4.5889
	0.268	0.184	72.2874	13.8344	4.58889
	0.268	0.212	72.2874	13.8344	4.58889
	0.268	0.24	72.2874	13.8344	4.5889
	0.268	0.268	72.2874	13.8344	4.58889
	0.268	0.296	72.2874	13.8345	4.5889
	0.268	0.324	72.2874	13.8344	4.58889
	0.268	0.352	72.2874	13.8344	4.5889
	0.268	0.38	72.2874	13.8344	4.5889
	0.268	0.408	72.2874	13.8344	4.58889
	0.268	0.436	72.2874	13.8344	4.5889
	0.268	0.464	72.2874	13.8344	4.58889
	0.268	0.492	72.2874	13.8344	4.5889
	0.268	0.52	72.2874	13.8344	4.5889
	0.268	0.548	72.2874	13.8344	4.5889
	0.268	0.576	72.2874	13.8344	4.5889
	0.268	0.604	72.2874	13.8344	4.58889
	0.268	0.632	72.2874	13.8344	4.5889
	0.268	0.66	72.2874	13.8345	4.5889
	0.268	0.688	72.2874	13.8344	4.5889
	0.268	0.716	72.2874	13.8344	4.5889
	0.268	0.744	72.2874	13.8344	4.5889
	0.268	0.772	72.2874	13.8344	4.58889
	0.268	0.8	72.2874	13.8344	4.58889
	0.268	0.828	72.2874	13.8344	4.58889
	0.268	0.856	72.2874	13.8345	4.5889
	0.268	0.884	72.2874	13.8344	4.5889
	0.268	0.912	72.2874	13.8344	4.5889
	0.268	0.94	72.2874	13.8344	4.58889
	0.268	0.968	72.2874	13.8344	4.5889
	0.268	0.996	72.2874	13.8344	4.58889
	0.268	1.024	72.2874	13.8344	4.5889
	0.268	1.052	72.2874	13.8344	4.58889
	0.268	1.08	72.2874	13.8344	4.5889
	0.268	1.108	72.2874	13.8344	4.5889
	0.268	1.136	72.2874	13.8344	4.58889
	0.268	1.164	72.2874	13.8344	4.58889
	0.268	1.192	72.2874	13.8344	4.5889
	0.268	1.22	72.2874	13.8344	4.5889
	0.268	1.248	72.2874	13.8344	4.5889
	0.268	1.276	72.2874	13.8344	4.5889
	0.268	1.304	72.2874	13.8344	4.58889
	0.268	1.332	72.2874	13.8344	4.5889
	0.268	1.36	72.2874	13.8344	4.5889
	0.268	1.388	72.2874	13.8344	4.58889
	0.268	1.416	72.2874	13.8344	4.58889
	0.268	1.444	72.2874	13.8344	4.5889
	0.268	1.472	72.2874	13.8344	4.5889
	0.268	1.5	72.2874	13.8344	4.5889
	0.296	0.128	72.2874	13.8344	4.5889
	0.296	0.156	72.2874	13.8344	4.58889
	0.296	0.184	72.2874	13.8344	4.5889
	0.296	0.212	72.2874	13.8344	4.5889
	0.296	0.24	72.2874	13.8345	4.5889
	0.296	0.268	72.2874	13.8344	4.5889
	0.296	0.296	72.2874	13.8344	4.58889
	0.296	0.324	72.2874	13.8344	4.5889
	0.296	0.352	72.2874	13.8344	4.5889
	0.296	0.38	72.2874	13.8344	4.5889
	0.296	0.408	72.2874	13.8345	4.5889
	0.296	0.436	72.2874	13.8344	4.5889
	0.296	0.464	72.2874	13.8344	4.5889
	0.296	0.492	72.2874	13.8344	4.58889
	0.296	0.52	72.2874	13.8344	4.5889
	0.296	0.548	72.2874	13.8344	4.5889
	0.296	0.576	72.2874	13.8344	4.58889
	0.296	0.604	72.2874	13.8345	4.5889
	0.296	0.632	72.2874	13.8344	4.5889
	0.296	0.66	72.2874	13.8345	4.5889
	0.296	0.688	72.2874	13.8344	4.5889
	0.296	0.716	72.2874	13.8344	4.58889
	0.296	0.744	72.2874	13.8344	4.5889
	0.296	0.772	72.2874	13.8344	4.5889
	0.296	0.8	72.2874	13.8344	4.58889
	0.296	0.828	72.2874	13.8344	4.5889
	0.296	0.856	72.2874	13.8344	4.5889
	0.296	0.884	72.2874	13.8344	4.58889
	0.296	0.912	72.2874	13.8344	4.5889
	0.296	0.94	72.2874	13.8344	4.5889
	0.296	0.968	72.2874	13.8344	4.5889
	0.296	0.996	72.2874	13.8344	4.5889
	0.296	1.024	72.2874	13.8344	4.58889
	0.296	1.052	72.2874	13.8344	4.5889
	0.296	1.08	72.2874	13.8344	4.58889
	0.296	1.108	72.2874	13.8344	4.58889
	0.296	1.136	72.2874	13.8344	4.5889
	0.296	1.164	72.2874	13.8344	4.5889
	0.296	1.192	72.2874	13.8344	4.58889
	0.296	1.22	72.2874	13.8344	4.5889
	0.296	1.248	72.2874	13.8345	4.5889
	0.296	1.276	72.2874	13.8344	4.5889
	0.296	1.304	72.2874	13.8344	4.58889
	0.296	1.332	72.2874	13.8344	4.58889
	0.296	1.36	72.2874	13.8344	4.5889
	0.296	1.388	72.2874	13.8344	4.5889
	0.296	1.416	72.2874	13.8344	4.5889
	0.296	1.444	72.2874	13.8345	4.5889
	0.296	1.472	72.2874	13.8344	4.5889
	0.296	1.5	72.2874	13.8345	4.5889
	0.324	0.128	72.2874	13.8345	4.5889
	0.324	0.156	72.2874	13.8345	4.5889
	0.324	0.184	72.2874	13.8345	4.5889
	0.324	0.212	72.2874	13.8344	4.5889
	0.324	0.24	72.2874	13.8344	4.58889
	0.324	0.268	72.2874	13.8344	4.5889
	0.324	0.296	72.2874	13.8344	4.5889
	0.324	0.324	72.2874	13.8344	4.58889
	0.324	0.352	72.2874	13.8344	4.58889
	0.324	0.38	72.2874	13.8344	4.5889
	0.324	0.408	72.2874	13.8344	4.5889
	0.324	0.436	72.2874	13.8344	4.5889
	0.324	0.464	72.2874	13.8344	4.5889
	0.324	0.492	72.2874	13.8344	4.5889
	0.324	0.52	72.2874	13.8344	4.5889
	0.324	0.548	72.2874	13.8344	4.58889
	0.324	0.576	72.2874	13.8345	4.5889
	0.324	0.604	72.2874	13.8345	4.5889
	0.324	0.632	72.2874	13.8344	4.5889
	0.324	0.66	72.2874	13.8344	4.5889
	0.324	0.688	72.2874	13.8344	4.58889
	0.324	0.716	72.2874	13.8344	4.5889
	0.324	0.744	72.2874	13.8344	4.5889
	0.324	0.772	72.2874	13.8344	4.5889
	0.324	0.8	72.2874	13.8344	4.58889
	0.324	0.828	72.2874	13.8344	4.58889
	0.324	0.856	72.2874	13.8344	4.58889
	0.324	0.884	72.2874	13.8345	4.5889
	0.324	0.912	72.2874	13.8344	4.58889
	0.324	0.94	72.2874	13.8344	4.5889
	0.324	0.968	72.2874	13.8345	4.5889
	0.324	0.996	72.2874	13.8344	4.58889
	0.324	1.024	72.2874	13.8344	4.58889
	0.324	1.052	72.2874	13.8344	4.58889
	0.324	1.08	72.2874	13.8344	4.5889
	0.324	1.108	72.2874	13.8344	4.58889
	0.324	1.136	72.2874	13.8344	4.58889
	0.324	1.164	72.2874	13.8344	4.58889
	0.324	1.192	72.2874	13.8344	4.58889
	0.324	1.22	72.2874	13.8344	4.58889
	0.324	1.248	72.2874	13.8344	4.58889
	0.324	1.276	72.2874	13.8344	4.58889
	0.324	1.304	72.2874	13.8344	4.58889
	0.324	1.332	72.2874	13.8344	4.58889
	0.324	1.36	72.2874	13.8344	4.58889
	0.324	1.388	72.2874	13.8344	4.5889
	0.324	1.416	72.2874	13.8344	4.5889
	0.324	1.444	72.2874	13.8344	4.5889
	0.324	1.472	72.2874	13.8344	4.58889
	0.324	1.5	72.2874	13.8344	4.5889
	0.352	0.128	72.2874	13.8344	4.58889
	0.352	0.156	72.2874	13.8344	4.5889
	0.352	0.184	72.2874	13.8345	4.5889
	0.352	0.212	72.2874	13.8344	4.5889
	0.352	0.24	72.2874	13.8344	4.5889
	0.352	0.268	72.2874	13.8344	4.5889
	0.352	0.296	72.2874	13.8344	4.5889
	0.352	0.324	72.2874	13.8344	4.58889
	0.352	0.352	72.2874	13.8344	4.5889
	0.352	0.38	72.2874	13.8344	4.58889
	0.352	0.408	72.2874	13.8344	4.58889
	0.352	0.436	72.2874	13.8345	4.5889
	0.352	0.464	72.2874	13.8344	4.5889
	0.352	0.492	72.2874	13.8344	4.5889
	0.352	0.52	72.2874	13.8344	4.5889
	0.352	0.548	72.2874	13.8344	4.58889
	0.352	0.576	72.2874	13.8345	4.5889
	0.352	0.604	72.2874	13.8344	4.58889
	0.352	0.632	72.2874	13.8344	4.58889
	0.352	0.66	72.2874	13.8344	4.5889
	0.352	0.688	72.2874	13.8344	4.58889
	0.352	0.716	72.2874	13.8344	4.58889
	0.352	0.744	72.2874	13.8345	4.5889
	0.352	0.772	72.2874	13.8344	4.5889
	0.352	0.8	72.2874	13.8344	4.5889
	0.352	0.828	72.2874	13.8344	4.58889
	0.352	0.856	72.2874	13.8344	4.58889
	0.352	0.884	72.2874	13.8344	4.58889
	0.352	0.912	72.2874	13.8344	4.58889
	0.352	0.94	72.2874	13.8344	4.5889
	0.352	0.968	72.2874	13.8344	4.5889
	0.352	0.996	72.2874	13.8344	4.5889
	0.352	1.024	72.2874	13.8344	4.58889
	0.352	1.052	72.2874	13.8344	4.58889
	0.352	1.08	72.2874	13.8345	4.5889
	0.352	1.108	72.2874	13.8344	4.58889
	0.352	1.136	72.2874	13.8344	4.58889
	0.352	1.164	72.2874	13.8344	4.58889
	0.352	1.192	72.2874	13.8344	4.5889
	0.352	1.22	72.2874	13.8344	4.58889
	0.352	1.248	72.2874	13.8344	4.5889
	0.352	1.276	72.2874	13.8344	4.5889
	0.352	1.304	72.2874	13.8344	4.5889
	0.352	1.332	72.2874	13.8344	4.58889
	0.352	1.36	72.2874	13.8344	4.5889
	0.352	1.388	72.2874	13.8344	4.58889
	0.352	1.416	72.2874	13.8344	4.58889
	0.352	1.444	72.2874	13.8345	4.5889
	0.352	1.472	72.2874	13.8345	4.5889
	0.352	1.5	72.2874	13.8345	4.5889
	0.38	0.128	72.2874	13.8344	4.58889
	0.38	0.156	72.2874	13.8344	4.5889
	0.38	0.184	72.2874	13.8344	4.58889
	0.38	0.212	72.2874	13.8344	4.5889
	0.38	0.24	72.2874	13.8344	4.5889
	0.38	0.268	72.2874	13.8344	4.58889
	0.38	0.296	72.2874	13.8344	4.5889
	0.38	0.324	72.2874	13.8344	4.5889
	0.38	0.352	72.2874	13.8344	4.58889
	0.38	0.38	72.2874	13.8344	4.58889
	0.38	0.408	72.2874	13.8344	4.58889
	0.38	0.436	72.2874	13.8344	4.5889
	0.38	0.464	72.2874	13.8344	4.58889
	0.38	0.492	72.2874	13.8345	4.5889
	0.38	0.52	72.2874	13.8344	4.58889
	0.38	0.548	72.2874	13.8344	4.5889
	0.38	0.576	72.2874	13.8344	4.5889
	0.38	0.604	72.2874	13.8344	4.5889
	0.38	0.632	72.2874	13.8344	4.5889
	0.38	0.66	72.2874	13.8345	4.5889
	0.38	0.688	72.2874	13.8344	4.58889
	0.38	0.716	72.2874	13.8344	4.58889
	0.38	0.744	72.2874	13.8345	4.5889
	0.38	0.772	72.2874	13.8344	4.58889
	0.38	0.8	72.2874	13.8344	4.5889
	0.38	0.828	72.2874	13.8344	4.58889
	0.38	0.856	72.2874	13.8344	4.58889
	0.38	0.884	72.2874	13.8344	4.58889
	0.38	0.912	72.2874	13.8344	4.58889
	0.38	0.94	72.2874	13.8344	4.58889
	0.38	0.968	72.2874	13.8344	4.5889
	0.38	0.996	72.2874	13.8344	4.58889
	0.38	1.024	72.2874	13.8344	4.5889
	0.38	1.052	72.2874	13.8345	4.5889
	0.38	1.08	72.2874	13.8344	4.58889
	0.38	1.108	72.2874	13.8344	4.5889
	0.38	1.136	72.2874	13.8344	4.5889
	0.38	1.164	72.2874	13.8344	4.58889
	0.38	1.192	72.2874	13.8344	4.5889
	0.38	1.22	72.2874	13.8344	4.5889
	0.38	1.248	72.2874	13.8344	4.5889
	0.38	1.276	72.2874	13.8344	4.58889
	0.38	1.304	72.2874	13.8345	4.5889
	0.38	1.332	72.2874	13.8344	4.5889
	0.38	1.36	72.2874	13.8344	4.5889
	0.38	1.388	72.2874	13.8344	4.58889
	0.38	1.416	72.2874	13.8344	4.58889
	0.38	1.444	72.2874	13.8344	4.5889
	0.38	1.472	72.2874	13.8345	4.5889
	0.38	1.5	72.2874	13.8344	4.58889
	0.408	0.128	72.2874	13.8344	4.58889
	0.408	0.156	72.2874	13.8344	4.5889
	0.408	0.184	72.2874	13.8344	4.5889
	0.408	0.212	72.2874	13.8344	4.58889
	0.408	0.24	72.2874	13.8344	4.58889
	0.408	0.268	72.2874	13.8344	4.58889
	0.408	0.296	72.2874	13.8344	4.5889
	0.408	0.324	72.2874	13.8344	4.5889
	0.408	0.352	72.2874	13.8344	4.58889
	0.408	0.38	72.2874	13.8344	4.5889
	0.408	0.408	72.2874	13.8344	4.5889
	0.408	0.436	72.2874	13.8344	4.58889
	0.408	0.464	72.2874	13.8344	4.5889
	0.408	0.492	72.2874	13.8344	4.5889
	0.408	0.52	72.2874	13.8344	4.58889
	0.408	0.548	72.2874	13.8344	4.5889
	0.408	0.576	72.2874	13.8344	4.5889
	0.408	0.604	72.2874	13.8344	4.5889
	0.408	0.632	72.2874	13.8345	4.5889
	0.408	0.66	72.2874	13.8344	4.5889
	0.408	0.688	72.2874	13.8344	4.58889
	0.408	0.716	72.2874	13.8344	4.58889
	0.408	0.744	72.2874	13.8344	4.5889
	0.408	0.772	72.2874	13.8344	4.5889
	0.408	0.8	72.2874	13.8344	4.58889
	0.408	0.828	72.2874	13.8345	4.5889
	0.408	0.856	72.2874	13.8344	4.58889
	0.408	0.884	72.2874	13.8344	4.5889
	0.408	0.912	72.2874	13.8344	4.5889
	0.408	0.94	72.2874	13.8344	4.58889
	0.408	0.968	72.2874	13.8344	4.5889
	0.408	0.996	72.2874	13.8345	4.5889
	0.408	1.024	72.2874	13.8344	4.5889
	0.408	1.052	72.2874	13.8344	4.5889
	0.408	1.08	72.2874	13.8344	4.58889
	0.408	1.108	72.2874	13.8344	4.58889
	0.408	1.136	72.2874	13.8344	4.58889
	0.408	1.164	72.2874	13.8344	4.5889
	0.408	1.192	72.2874	13.8344	4.5889
	0.408	1.22	72.2874	13.8344	4.58889
	0.408	1.248	72.2874	13.8344	4.58889
	0.408	1.276	72.2874	13.8344	4.5889
	0.408	1.304	72.2874	13.8344	4.5889
	0.408	1.332	72.2874	13.8345	4.5889
	0.408	1.36	72.2874	13.8344	4.5889
	0.408	1.388	72.2874	13.8344	4.5889
	0.408	1.416	72.2874	13.8344	4.5889
	0.408	1.444	72.2874	13.8344	4.5889
	0.408	1.472	72.2874	13.8344	4.5889
	0.408	1.5	72.2874	13.8345	4.5889
	0.436	0.128	72.2874	13.8344	4.5889
	0.436	0.156	72.2874	13.8344	4.5889
	0.436	0.184	72.2874	13.8345	4.5889
	0.436	0.212	72.2874	13.8344	4.5889
	0.436	0.24	72.2874	13.8344	4.58889
	0.436	0.268	72.2874	13.8344	4.5889
	0.436	0.296	72.2874	13.8344	4.58889
	0.436	0.324	72.2874	13.8345	4.5889
	0.436	0.352	72.2874	13.8344	4.5889
	0.436	0.38	72.2874	13.8344	4.5889
	0.436	0.408	72.2874	13.8344	4.58889
	0.436	0.436	72.2874	13.8344	4.58889
	0.436	0.464	72.2874	13.8344	4.5889
	0.436	0.492	72.2874	13.8344	4.5889
	0.436	0.52	72.2874	13.8345	4.5889
	0.436	0.548	72.2874	13.8344	4.5889
	0.436	0.576	72.2874	13.8344	4.5889
	0.436	0.604	72.2874	13.8344	4.5889
	0.436	0.632	72.2874	13.8344	4.5889
	0.436	0.66	72.2874	13.8344	4.58889
	0.436	0.688	72.2874	13.8344	4.58889
	0.436	0.716	72.2874	13.8344	4.58889
	0.436	0.744	72.2874	13.8344	4.5889
	0.436	0.772	72.2874	13.8344	4.58889
	0.436	0.8	72.2874	13.8344	4.5889
	0.436	0.828	72.2874	13.8344	4.58889
	0.436	0.856	72.2874	13.8344	4.5889
	0.436	0.884	72.2874	13.8344	4.58889
	0.436	0.912	72.2874	13.8344	4.5889
	0.436	0.94	72.2874	13.8345	4.5889
	0.436	0.968	72.2874	13.8345	4.5889
	0.436	0.996	72.2874	13.8344	4.58889
	0.436	1.024	72.2874	13.8344	4.5889
	0.436	1.052	72.2874	13.8344	4.58889
	0.436	1.08	72.2874	13.8344	4.58889
	0.436	1.108	72.2874	13.8344	4.5889
	0.436	1.136	72.2874	13.8344	4.5889
	0.436	1.164	72.2874	13.8344	4.5889
	0.436	1.192	72.2874	13.8344	4.58889
	0.436	1.22	72.2874	13.8344	4.58889
	0.436	1.248	72.2874	13.8345	4.5889
	0.436	1.276	72.2874	13.8344	4.5889
	0.436	1.304	72.2874	13.8345	4.5889
	0.436	1.332	72.2874	13.8344	4.58889
	0.436	1.36	72.2874	13.8344	4.5889
	0.436	1.388	72.2874	13.8344	4.58889
	0.436	1.416	72.2874	13.8344	4.58889
	0.436	1.444	72.2874	13.8344	4.5889
	0.436	1.472	72.2874	13.8344	4.58889
	0.436	1.5	72.2874	13.8344	4.5889
	0.464	0.128	72.2874	13.8344	4.58889
	0.464	0.156	72.2874	13.8344	4.5889
	0.464	0.184	72.2874	13.8344	4.58889
	0.464	0.212	72.2874	13.8344	4.5889
	0.464	0.24	72.2874	13.8344	4.5889
	0.464	0.268	72.2874	13.8344	4.58889
	0.464	0.296	72.2874	13.8345	4.5889
	0.464	0.324	72.2874	13.8345	4.5889
	0.464	0.352	72.2874	13.8344	4.5889
	0.464	0.38	72.2874	13.8344	4.5889
	0.464	0.408	72.2874	13.8345	4.5889
	0.464	0.436	72.2874	13.8344	4.5889
	0.464	0.464	72.2874	13.8344	4.5889
	0.464	0.492	72.2874	13.8344	4.5889
	0.464	0.52	72.2874	13.8344	4.5889
	0.464	0.548	72.2874	13.8344	4.5889
	0.464	0.576	72.2874	13.8344	4.5889
	0.464	0.604	72.2874	13.8344	4.58889
	0.464	0.632	72.2874	13.8344	4.5889
	0.464	0.66	72.2874	13.8344	4.58889
	0.464	0.688	72.2874	13.8344	4.58889
	0.464	0.716	72.2874	13.8345	4.5889
	0.464	0.744	72.2874	13.8344	4.58889
	0.464	0.772	72.2874	13.8345	4.5889
	0.464	0.8	72.2874	13.8344	4.5889
	0.464	0.828	72.2874	13.8344	4.5889
	0.464	0.856	72.2874	13.8345	4.5889
	0.464	0.884	72.2874	13.8344	4.58889
	0.464	0.912	72.2874	13.8345	4.5889
	0.464	0.94	72.2874	13.8344	4.58889
	0.464	0.968	72.2874	13.8344	4.58889
	0.464	0.996	72.2874	13.8344	4.5889
	0.464	1.024	72.2874	13.8344	4.58889
	0.464	1.052	72.2874	13.8344	4.58889
	0.464	1.08	72.2874	13.8344	4.5889
	0.464	1.108	72.2874	13.8344	4.5889
	0.464	1.136	72.2874	13.8345	4.5889
	0.464	1.164	72.2874	13.8344	4.5889
	0.464	1.192	72.2874	13.8344	4.58889
	0.464	1.22	72.2874	13.8344	4.58889
	0.464	1.248	72.2874	13.8344	4.58889
	0.464	1.276	72.2874	13.8344	4.58889
	0.464	1.304	72.2874	13.8344	4.58889
	0.464	1.332	72.2874	13.8344	4.58889
	0.464	1.36	72.2874	13.8344	4.58889
	0.464	1.388	72.2874	13.8344	4.5889
	0.464	1.416	72.2874	13.8344	4.5889
	0.464	1.444	72.2874	13.8345	4.5889
	0.464	1.472	72.2874	13.8344	4.58889
	0.464	1.5	72.2874	13.8344	4.58889
	0.492	0.128	72.2874	13.8344	4.5889
	0.492	0.156	72.2874	13.8344	4.5889
	0.492	0.184	72.2874	13.8344	4.5889
	0.492	0.212	72.2874	13.8344	4.5889
	0.492	0.24	72.2874	13.8345	4.5889
	0.492	0.268	72.2874	13.8345	4.5889
	0.492	0.296	72.2874	13.8344	4.5889
	0.492	0.324	72.2874	13.8344	4.58889
	0.492	0.352	72.2874	13.8345	4.5889
	0.492	0.38	72.2874	13.8344	4.58889
	0.492	0.408	72.2874	13.8344	4.5889
	0.492	0.436	72.2874	13.8345	4.5889
	0.492	0.464	72.2874	13.8344	4.58889
	0.492	0.492	72.2874	13.8344	4.5889
	0.492	0.52	72.2874	13.8344	4.5889
	0.492	0.548	72.2874	13.8344	4.5889
	0.492	0.576	72.2874	13.8344	4.5889
	0.492	0.604	72.2874	13.8344	4.58889
	0.492	0.632	72.2874	13.8344	4.5889
	0.492	0.66	72.2874	13.8344	4.5889
	0.492	0.688	72.2874	13.8344	4.58889
	0.492	0.716	72.2874	13.8344	4.58889
	0.492	0.744	72.2874	13.8344	4.5889
	0.492	0.772	72.2874	13.8345	4.5889
	0.492	0.8	72.2874	13.8344	4.58889
	0.492	0.828	72.2874	13.8344	4.5889
	0.492	0.856	72.2874	13.8344	4.5889
	0.492	0.884	72.2874	13.8344	4.58889
	0.492	0.912	72.2874	13.8344	4.5889
	0.492	0.94	72.2874	13.8344	4.58889
	0.492	0.968	72.2874	13.8344	4.58889
	0.492	0.996	72.2874	13.8344	4.58889
	0.492	1.024	72.2874	13.8344	4.58889
	0.492	1.052	72.2874	13.8344	4.58889
	0.492	1.08	72.2874	13.8344	4.58889
	0.492	1.108	72.2874	13.8344	4.58889
	0.492	1.136	72.2874	13.8344	4.58889
	0.492	1.164	72.2874	13.8344	4.58889
	0.492	1.192	72.2874	13.8344	4.58889
	0.492	1.22	72.2874	13.8344	4.5889
	0.492	1.248	72.2874	13.8344	4.58889
	0.492	1.276	72.2874	13.8344	4.5889
	0.492	1.304	72.2874	13.8344	4.58889
	0.492	1.332	72.2874	13.8344	4.5889
	0.492	1.36	72.2874	13.8345	4.5889
	0.492	1.388	72.2874	13.8344	4.58889
	0.492	1.416	72.2874	13.8344	4.58889
	0.492	1.444	72.2874	13.8345	4.5889
	0.492	1.472	72.2874	13.8344	4.5889
	0.492	1.5	72.2874	13.8344	4.58889
	0.52	0.128	72.2874	13.8344	4.58889
	0.52	0.156	72.2874	13.8345	4.5889
	0.52	0.184	72.2874	13.8345	4.5889
	0.52	0.212	72.2874	13.8345	4.5889
	0.52	0.24	72.2874	13.8344	4.5889
	0.52	0.268	72.2874	13.8345	4.5889
	0.52	0.296	72.2874	13.8344	4.58889
	0.52	0.324	72.2874	13.8344	4.5889
	0.52	0.352	72.2874	13.8344	4.5889
	0.52	0.38	72.2874	13.8344	4.5889
	0.52	0.408	72.2874	13.8344	4.5889
	0.52	0.436	72.2874	13.8344	4.58889
	0.52	0.464	72.2874	13.8344	4.5889
	0.52	0.492	72.2874	13.8344	4.5889
	0.52	0.52	72.2874	13.8344	4.5889
	0.52	0.548	72.2874	13.8344	4.58889
	0.52	0.576	72.2874	13.8344	4.5889
	0.52	0.604	72.2874	13.8344	4.58889
	0.52	0.632	72.2874	13.8345	4.5889
	0.52	0.66	72.2874	13.8344	4.5889
	0.52	0.688	72.2874	13.8344	4.58889
	0.52	0.716	72.2874	13.8344	4.5889
	0.52	0.744	72.2874	13.8344	4.5889
	0.52	0.772	72.2874	13.8344	4.58889
	0.52	0.8	72.2874	13.8344	4.58889
	0.52	0.828	72.2874	13.8344	4.5889
	0.52	0.856	72.2874	13.8344	4.5889
	0.52	0.884	72.2874	13.8344	4.58889
	0.52	0.912	72.2874	13.8344	4.58889
	0.52	0.94	72.2874	13.8344	4.58889
	0.52	0.968	72.2874	13.8344	4.5889
	0.52	0.996	72.2874	13.8344	4.5889
	0.52	1.024	72.2874	13.8344	4.5889
	0.52	1.052	72.2874	13.8344	4.58889
	0.52	1.08	72.2874	13.8344	4.58889
	0.52	1.108	72.2874	13.8344	4.5889
	0.52	1.136	72.2874	13.8345	4.5889
	0.52	1.164	72.2874	13.8344	4.5889
	0.52	1.192	72.2874	13.8344	4.58889
	0.52	1.22	72.2874	13.8344	4.58889
	0.52	1.248	72.2874	13.8345	4.5889
	0.52	1.276	72.2874	13.8344	4.5889
	0.52	1.304	72.2874	13.8345	4.5889
	0.52	1.332	72.2874	13.8344	4.5889
	0.52	1.36	72.2874	13.8344	4.58889
	0.52	1.388	72.2874	13.8345	4.5889
	0.52	1.416	72.2874	13.8344	4.58889
	0.52	1.444	72.2874	13.8344	4.5889
	0.52	1.472	72.2874	13.8344	4.58889
	0.52	1.5	72.2874	13.8344	4.5889
	0.548	0.128	72.2874	13.8344	4.58889
	0.548	0.156	72.2874	13.8345	4.5889
	0.548	0.184	72.2874	13.8344	4.5889
	0.548	0.212	72.2874	13.8344	4.5889
	0.548	0.24	72.2874	13.8344	4.5889
	0.548	0.268	72.2874	13.8344	4.5889
	0.548	0.296	72.2874	13.8344	4.5889
	0.548	0.324	72.2874	13.8344	4.5889
	0.548	0.352	72.2874	13.8344	4.5889
	0.548	0.38	72.2874	13.8345	4.5889
	0.548	0.408	72.2874	13.8345	4.5889
	0.548	0.436	72.2874	13.8344	4.58889
	0.548	0.464	72.2874	13.8344	4.5889
	0.548	0.492	72.2874	13.8344	4.5889
	0.548	0.52	72.2874	13.8344	4.58889
	0.548	0.548	72.2874	13.8345	4.5889
	0.548	0.576	72.2874	13.8344	4.5889
	0.548	0.604	72.2874	13.8344	4.58889
	0.548	0.632	72.2874	13.8344	4.58889
	0.548	0.66	72.2874	13.8344	4.58889
	0.548	0.688	72.2874	13.8344	4.5889
	0.548	0.716	72.2874	13.8344	4.5889
	0.548	0.744	72.2874	13.8344	4.58889
	0.548	0.772	72.2874	13.8344	4.5889
	0.548	0.8	72.2874	13.8344	4.58889
	0.548	0.828	72.2874	13.8344	4.58889
	0.548	0.856	72.2874	13.8345	4.5889
	0.548	0.884	72.2874	13.8344	4.58889
	0.548	0.912	72.2874	13.8344	4.58889
	0.548	0.94	72.2874	13.8344	4.5889
	0.548	0.968	72.2874	13.8344	4.5889
	0.548	0.996	72.2874	13.8344	4.58889
	0.548	1.024	72.2874	13.8344	4.58889
	0.548	1.052	72.2874	13.8344	4.5889
	0.548	1.08	72.2874	13.8344	4.5889
	0.548	1.108	72.2874	13.8344	4.5889
	0.548	1.136	72.2874	13.8344	4.5889
	0.548	1.164	72.2874	13.8344	4.5889
	0.548	1.192	72.2874	13.8344	4.5889
	0.548	1.22	72.2874	13.8345	4.5889
	0.548	1.248	72.2874	13.8344	4.58889
	0.548	1.276	72.2874	13.8344	4.5889
	0.548	1.304	72.2874	13.8344	4.5889
	0.548	1.332	72.2874	13.8344	4.5889
	0.548	1.36	72.2874	13.8344	4.58889
	0.548	1.388	72.2874	13.8344	4.58889
	0.548	1.416	72.2874	13.8345	4.5889
	0.548	1.444	72.2874	13.8344	4.58889
	0.548	1.472	72.2874	13.8344	4.5889
	0.548	1.5	72.2874	13.8344	4.5889
	0.576	0.128	72.2874	13.8344	4.5889
	0.576	0.156	72.2874	13.8344	4.58889
	0.576	0.184	72.2874	13.8344	4.58889
	0.576	0.212	72.2874	13.8344	4.58889
	0.576	0.24	72.2874	13.8344	4.5889
	0.576	0.268	72.2874	13.8344	4.5889
	0.576	0.296	72.2874	13.8344	4.5889
	0.576	0.324	72.2874	13.8345	4.5889
	0.576	0.352	72.2874	13.8344	4.5889
	0.576	0.38	72.2874	13.8345	4.5889
	0.576	0.408	72.2874	13.8344	4.5889
	0.576	0.436	72.2874	13.8344	4.5889
	0.576	0.464	72.2874	13.8345	4.5889
	0.576	0.492	72.2874	13.8345	4.5889
	0.576	0.52	72.2874	13.8344	4.58889
	0.576	0.548	72.2874	13.8345	4.5889
	0.576	0.576	72.2874	13.8344	4.5889
	0.576	0.604	72.2874	13.8344	4.58889
	0.576	0.632	72.2874	13.8344	4.5889
	0.576	0.66	72.2874	13.8345	4.5889
	0.576	0.688	72.2874	13.8344	4.58889
	0.576	0.716	72.2874	13.8344	4.58889
	0.576	0.744	72.2874	13.8344	4.58889
	0.576	0.772	72.2874	13.8344	4.58889
	0.576	0.8	72.2874	13.8344	4.58889
	0.576	0.828	72.2874	13.8345	4.5889
	0.576	0.856	72.2874	13.8345	4.5889
	0.576	0.884	72.2874	13.8344	4.5889
	0.576	0.912	72.2874	13.8344	4.5889
	0.576	0.94	72.2874	13.8345	4.5889
	0.576	0.968	72.2874	13.8344	4.58889
	0.576	0.996	72.2874	13.8344	4.58889
	0.576	1.024	72.2874	13.8345	4.5889
	0.576	1.052	72.2874	13.8344	4.5889
	0.576	1.08	72.2874	13.8345	4.5889
	0.576	1.108	72.2874	13.8344	4.5889
	0.576	1.136	72.2874	13.8344	4.5889
	0.576	1.164	72.2874	13.8344	4.5889
	0.576	1.192	72.2874	13.8345	4.5889
	0.576	1.22	72.2874	13.8344	4.5889
	0.576	1.248	72.2874	13.8344	4.5889
	0.576	1.276	72.2874	13.8344	4.5889
	0.576	1.304	72.2874	13.8344	4.58889
	0.576	1.332	72.2874	13.8344	4.58889
	0.576	1.36	72.2874	13.8344	4.5889
	0.576	1.388	72.2874	13.8344	4.5889
	0.576	1.416	72.2874	13.8345	4.5889
	0.576	1.444	72.2874	13.8344	4.58889
	0.576	1.472	72.2874	13.8344	4.58889
	0.576	1.5	72.2874	13.8344	4.58889
	0.604	0.128	72.2874	13.8344	4.58889
	0.604	0.156	72.2874	13.8344	4.5889
	0.604	0.184	72.2874	13.8344	4.5889
	0.604	0.212	72.2874	13.8344	4.5889
	0.604	0.24	72.2874	13.8344	4.58889
	0.604	0.268	72.2874	13.8344	4.58889
	0.604	0.296	72.2874	13.8344	4.58889
	0.604	0.324	72.2874	13.8345	4.5889
	0.604	0.352	72.2874	13.8344	4.5889
	0.604	0.38	72.2874	13.8345	4.5889
	0.604	0.408	72.2874	13.8344	4.58889
	0.604	0.436	72.2874	13.8344	4.58889
	0.604	0.464	72.2874	13.8345	4.5889
	0.604	0.492	72.2874	13.8344	4.5889
	0.604	0.52	72.2874	13.8344	4.58889
	0.604	0.548	72.2874	13.8344	4.5889
	0.604	0.576	72.2874	13.8344	4.5889
	0.604	0.604	72.2874	13.8344	4.5889
	0.604	0.632	72.2874	13.8345	4.5889
	0.604	0.66	72.2874	13.8344	4.58889
	0.604	0.688	72.2874	13.8344	4.58889
	0.604	0.716	72.2874	13.8344	4.58889
	0.604	0.744	72.2874	13.8344	4.5889
	0.604	0.772	72.2874	13.8344	4.5889
	0.604	0.8	72.2874	13.8344	4.58889
	0.604	0.828	72.2874	13.8344	4.58889
	0.604	0.856	72.2874	13.8344	4.58889
	0.604	0.884	72.2874	13.8344	4.58889
	0.604	0.912	72.2874	13.8345	4.5889
	0.604	0.94	72.2874	13.8344	4.5889
	0.604	0.968	72.2874	13.8344	4.5889
	0.604	0.996	72.2874	13.8344	4.58889
	0.604	1.024	72.2874	13.8344	4.5889
	0.604	1.052	72.2874	13.8344	4.5889
	0.604	1.08	72.2874	13.8345	4.5889
	0.604	1.108	72.2874	13.8344	4.5889
	0.604	1.136	72.2874	13.8344	4.58889
	0.604	1.164	72.2874	13.8344	4.5889
	0.604	1.192	72.2874	13.8344	4.5889
	0.604	1.22	72.2874	13.8344	4.5889
	0.604	1.248	72.2874	13.8344	4.58889
	0.604	1.276	72.2874	13.8344	4.5889
	0.604	1.304	72.2874	13.8344	4.5889
	0.604	1.332	72.2874	13.8344	4.5889
	0.604	1.36	72.2874	13.8344	4.5889
	0.604	1.388	72.2874	13.8344	4.58889
	0.604	1.416	72.2874	13.8344	4.5889
	0.604	1.444	72.2874	13.8344	4.58889
	0.604	1.472	72.2874	13.8345	4.5889
	0.604	1.5	72.2874	13.8344	4.58889
	0.632	0.128	72.2874	13.8344	4.58889
	0.632	0.156	72.2874	13.8344	4.5889
	0.632	0.184	72.2874	13.8344	4.5889
	0.632	0.212	72.2874	13.8344	4.5889
	0.632	0.24	72.2874	13.8345	4.5889
	0.632	0.268	72.2874	13.8345	4.5889
	0.632	0.296	72.2874	13.8344	4.5889
	0.632	0.324	72.2874	13.8344	4.5889
	0.632	0.352	72.2874	13.8344	4.5889
	0.632	0.38	72.2874	13.8345	4.5889
	0.632	0.408	72.2874	13.8345	4.5889
	0.632	0.436	72.2874	13.8345	4.5889
	0.632	0.464	72.2874	13.8344	4.5889
	0.632	0.492	72.2874	13.8345	4.5889
	0.632	0.52	72.2874	13.8344	4.58889
	0.632	0.548	72.2874	13.8344	4.58889
	0.632	0.576	72.2874	13.8344	4.58889
	0.632	0.604	72.2874	13.8344	4.5889
	0.632	0.632	72.2874	13.8344	4.58889
	0.632	0.66	72.2874	13.8344	4.5889
	0.632	0.688	72.2874	13.8345	4.5889
	0.632	0.716	72.2874	13.8344	4.5889
	0.632	0.744	72.2874	13.8344	4.58889
	0.632	0.772	72.2874	13.8344	4.58889
	0.632	0.8	72.2874	13.8344	4.58889
	0.632	0.828	72.2874	13.8344	4.5889
	0.632	0.856	72.2874	13.8344	4.58889
	0.632	0.884	72.2874	13.8344	4.58889
	0.632	0.912	72.2874	13.8344	4.5889
	0.632	0.94	72.2874	13.8344	4.5889
	0.632	0.968	72.2874	13.8344	4.5889
	0.632	0.996	72.2874	13.8344	4.5889
	0.632	1.024	72.2874	13.8344	4.5889
	0.632	1.052	72.2874	13.8344	4.5889
	0.632	1.08	72.2874	13.8344	4.58889
	0.632	1.108	72.2874	13.8344	4.58889
	0.632	1.136	72.2874	13.8345	4.5889
	0.632	1.164	72.2874	13.8344	4.58889
	0.632	1.192	72.2874	13.8344	4.58889
	0.632	1.22	72.2874	13.8344	4.58889
	0.632	1.248	72.2874	13.8344	4.58889
	0.632	1.276	72.2874	13.8344	4.58889
	0.632	1.304	72.2874	13.8345	4.5889
	0.632	1.332	72.2874	13.8345	4.5889
	0.632	1.36	72.2874	13.8344	4.58889
	0.632	1.388	72.2874	13.8345	4.5889
	0.632	1.416	72.2874	13.8344	4.5889
	0.632	1.444	72.2874	13.8344	4.58889
	0.632	1.472	72.2874	13.8345	4.5889
	0.632	1.5	72.2874	13.8344	4.58889
	0.66	0.128	72.2874	13.8344	4.58889
	0.66	0.156	72.2874	13.8344	4.58889
	0.66	0.184	72.2874	13.8344	4.5889
	0.66	0.212	72.2874	13.8344	4.5889
	0.66	0.24	72.2874	13.8344	4.5889
	0.66	0.268	72.2874	13.8344	4.5889
	0.66	0.296	72.2874	13.8344	4.58889
	0.66	0.324	72.2874	13.8344	4.58889
	0.66	0.352	72.2874	13.8344	4.58889
	0.66	0.38	72.2874	13.8344	4.5889
	0.66	0.408	72.2874	13.8344	4.5889
	0.66	0.436	72.2874	13.8344	4.58889
	0.66	0.464	72.2874	13.8344	4.5889
	0.66	0.492	72.2874	13.8344	4.5889
	0.66	0.52	72.2874	13.8344	4.58889
	0.66	0.548	72.2874	13.8344	4.58889
	0.66	0.576	72.2874	13.8344	4.5889
	0.66	0.604	72.2874	13.8344	4.5889
	0.66	0.632	72.2874	13.8344	4.58889
	0.66	0.66	72.2874	13.8344	4.58889
	0.66	0.688	72.2874	13.8344	4.5889
	0.66	0.716	72.2874	13.8344	4.58889
	0.66	0.744	72.2874	13.8344	4.58889
	0.66	0.772	72.2874	13.8344	4.58889
	0.66	0.8	72.2874	13.8344	4.5889
	0.66	0.828	72.2874	13.8344	4.58889
	0.66	0.856	72.2874	13.8344	4.5889
	0.66	0.884	72.2874	13.8344	4.58889
	0.66	0.912	72.2874	13.8344	4.58889
	0.66	0.94	72.2874	13.8344	4.58889
	0.66	0.968	72.2874	13.8344	4.58889
	0.66	0.996	72.2874	13.8344	4.5889
	0.66	1.024	72.2874	13.8344	4.58889
	0.66	1.052	72.2874	13.8344	4.58889
	0.66	1.08	72.2874	13.8345	4.5889
	0.66	1.108	72.2874	13.8344	4.5889
	0.66	1.136	72.2874	13.8344	4.5889
	0.66	1.164	72.2874	13.8344	4.5889
	0.66	1.192	72.2874	13.8344	4.5889
	0.66	1.22	72.2874	13.8344	4.5889
	0.66	1.248	72.2874	13.8344	4.5889
	0.66	1.276	72.2874	13.8344	4.5889
	0.66	1.304	72.2874	13.8344	4.58889
	0.66	1.332	72.2874	13.8344	4.58889
	0.66	1.36	72.2874	13.8344	4.58889
	0.66	1.388	72.2874	13.8344	4.58889
	0.66	1.416	72.2874	13.8344	4.5889
	0.66	1.444	72.2874	13.8344	4.58889
	0.66	1.472	72.2874	13.8344	4.58889
	0.66	1.5	72.2874	13.8344	4.58889
	0.688	0.128	72.2874	13.8344	4.5889
	0.688	0.156	72.2874	13.8344	4.5889
	0.688	0.184	72.2874	13.8344	4.5889
	0.688	0.212	72.2874	13.8344	4.58889
	0.688	0.24	72.2874	13.8344	4.58889
	0.688	0.268	72.2874	13.8344	4.5889
	0.688	0.296	72.2874	13.8344	4.5889
	0.688	0.324	72.2874	13.8344	4.5889
	0.688	0.352	72.2874	13.8344	4.5889
	0.688	0.38	72.2874	13.8344	4.58889
	0.688	0.408	72.2874	13.8344	4.5889
	0.688	0.436	72.2874	13.8344	4.58889
	0.688	0.464	72.2874	13.8345	4.5889
	0.688	0.492	72.2874	13.8344	4.58889
	0.688	0.52	72.2874	13.8344	4.5889
	0.688	0.548	72.2874	13.8344	4.5889
	0.688	0.576	72.2874	13.8344	4.5889
	0.688	0.604	72.2874	13.8344	4.58889
	0.688	0.632	72.2874	13.8345	4.5889
	0.688	0.66	72.2874	13.8344	4.58889
	0.688	0.688	72.2874	13.8344	4.5889
	0.688	0.716	72.2874	13.8344	4.58889
	0.688	0.744	72.2874	13.8344	4.58889
	0.688	0.772	72.2874	13.8344	4.58889
	0.688	0.8	72.2874	13.8344	4.5889
	0.688	0.828	72.2874	13.8344	4.5889
	0.688	0.856	72.2874	13.8344	4.5889
	0.688	0.884	72.2874	13.8344	4.58889
	0.688	0.912	72.2874	13.8345	4.5889
	0.688	0.94	72.2874	13.8344	4.5889
	0.688	0.968	72.2874	13.8345	4.5889
	0.688	0.996	72.2874	13.8345	4.5889
	0.688	1.024	72.2874	13.8345	4.5889
	0.688	1.052	72.2874	13.8344	4.58889
	0.688	1.08	72.2874	13.8345	4.5889
	0.688	1.108	72.2874	13.8344	4.58889
	0.688	1.136	72.2874	13.8345	4.5889
	0.688	1.164	72.2874	13.8344	4.5889
	0.688	1.192	72.2874	13.8344	4.5889
	0.688	1.22	72.2874	13.8344	4.5889
	0.688	1.248	72.2874	13.8344	4.58889
	0.688	1.276	72.2874	13.8344	4.58889
	0.688	1.304	72.2874	13.8345	4.5889
	0.688	1.332	72.2874	13.8344	4.5889
	0.688	1.36	72.2874	13.8344	4.58889
	0.688	1.388	72.2874	13.8344	4.58889
	0.688	1.416	72.2874	13.8344	4.5889
	0.688	1.444	72.2874	13.8344	4.5889
	0.688	1.472	72.2874	13.8344	4.5889
	0.688	1.5	72.2874	13.8344	4.5889
	0.716	0.128	72.2874	13.8344	4.5889
	0.716	0.156	72.2874	13.8344	4.58889
	0.716	0.184	72.2874	13.8344	4.58889
	0.716	0.212	72.2874	13.8345	4.5889
	0.716	0.24	72.2874	13.8344	4.5889
	0.716	0.268	72.2874	13.8344	4.5889
	0.716	0.296	72.2874	13.8344	4.5889
	0.716	0.324	72.2874	13.8344	4.5889
	0.716	0.352	72.2874	13.8344	4.5889
	0.716	0.38	72.2874	13.8344	4.5889
	0.716	0.408	72.2874	13.8345	4.5889
	0.716	0.436	72.2874	13.8344	4.5889
	0.716	0.464	72.2874	13.8344	4.58889
	0.716	0.492	72.2874	13.8344	4.58889
	0.716	0.52	72.2874	13.8344	4.5889
	0.716	0.548	72.2874	13.8344	4.5889
	0.716	0.576	72.2874	13.8345	4.5889
	0.716	0.604	72.2874	13.8345	4.5889
	0.716	0.632	72.2874	13.8344	4.58889
	0.716	0.66	72.2874	13.8344	4.58889
	0.716	0.688	72.2874	13.8344	4.58889
	0.716	0.716	72.2874	13.8344	4.58889
	0.716	0.744	72.2874	13.8344	4.58889
	0.716	0.772	72.2874	13.8344	4.58889
	0.716	0.8	72.2874	13.8344	4.58889
	0.716	0.828	72.2874	13.8344	4.5889
	0.716	0.856	72.2874	13.8345	4.5889
	0.716	0.884	72.2874	13.8344	4.58889
	0.716	0.912	72.2874	13.8344	4.5889
	0.716	0.94	72.2874	13.8345	4.5889
	0.716	0.968	72.2874	13.8344	4.5889
	0.716	0.996	72.2874	13.8344	4.5889
	0.716	1.024	72.2874	13.8344	4.5889
	0.716	1.052	72.2874	13.8344	4.5889
	0.716	1.08	72.2874	13.8344	4.5889
	0.716	1.108	72.2874	13.8344	4.5889
	0.716	1.136	72.2874	13.8344	4.58889
	0.716	1.164	72.2874	13.8344	4.5889
	0.716	1.192	72.2874	13.8344	4.5889
	0.716	1.22	72.2874	13.8344	4.5889
	0.716	1.248	72.2874	13.8344	4.5889
	0.716	1.276	72.2874	13.8344	4.5889
	0.716	1.304	72.2874	13.8344	4.5889
	0.716	1.332	72.2874	13.8344	4.58889
	0.716	1.36	72.2874	13.8344	4.5889
	0.716	1.388	72.2874	13.8344	4.58889
	0.716	1.416	72.2874	13.8344	4.5889
	0.716	1.444	72.2874	13.8345	4.5889
	0.716	1.472	72.2874	13.8345	4.5889
	0.716	1.5	72.2874	13.8345	4.5889
	0.744	0.128	72.2874	13.8344	4.58889
	0.744	0.156	72.2874	13.8344	4.58889
	0.744	0.184	72.2874	13.8345	4.5889
	0.744	0.212	72.2874	13.8345	4.5889
	0.744	0.24	72.2874	13.8344	4.5889
	0.744	0.268	72.2874	13.8344	4.5889
	0.744	0.296	72.2874	13.8344	4.58889
	0.744	0.324	72.2874	13.8344	4.5889
	0.744	0.352	72.2874	13.8344	4.5889
	0.744	0.38	72.2874	13.8344	4.58889
	0.744	0.408	72.2874	13.8345	4.5889
	0.744	0.436	72.2874	13.8344	4.5889
	0.744	0.464	72.2874	13.8344	4.58889
	0.744	0.492	72.2874	13.8344	4.58889
	0.744	0.52	72.2874	13.8344	4.5889
	0.744	0.548	72.2874	13.8344	4.5889
	0.744	0.576	72.2874	13.8345	4.5889
	0.744	0.604	72.2874	13.8345	4.5889
	0.744	0.632	72.2874	13.8344	4.58889
	0.744	0.66	72.2874	13.8344	4.5889
	0.744	0.688	72.2874	13.8345	4.5889
	0.744	0.716	72.2874	13.8344	4.58889
	0.744	0.744	72.2874	13.8344	4.5889
	0.744	0.772	72.2874	13.8344	4.5889
	0.744	0.8	72.2874	13.8344	4.58889
	0.744	0.828	72.2874	13.8344	4.5889
	0.744	0.856	72.2874	13.8344	4.5889
	0.744	0.884	72.2874	13.8345	4.5889
	0.744	0.912	72.2874	13.8345	4.5889
	0.744	0.94	72.2874	13.8344	4.58889
	0.744	0.968	72.2874	13.8344	4.58889
	0.744	0.996	72.2874	13.8344	4.5889
	0.744	1.024	72.2874	13.8345	4.5889
	0.744	1.052	72.2874	13.8344	4.58889
	0.744	1.08	72.2874	13.8344	4.5889
	0.744	1.108	72.2874	13.8345	4.5889
	0.744	1.136	72.2874	13.8344	4.5889
	0.744	1.164	72.2874	13.8344	4.5889
	0.744	1.192	72.2874	13.8344	4.58889
	0.744	1.22	72.2874	13.8344	4.5889
	0.744	1.248	72.2874	13.8344	4.5889
	0.744	1.276	72.2874	13.8344	4.5889
	0.744	1.304	72.2874	13.8344	4.5889
	0.744	1.332	72.2874	13.8344	4.5889
	0.744	1.36	72.2874	13.8344	4.58889
	0.744	1.388	72.2874	13.8344	4.5889
	0.744	1.416	72.2874	13.8344	4.5889
	0.744	1.444	72.2874	13.8345	4.5889
	0.744	1.472	72.2874	13.8345	4.5889
	0.744	1.5	72.2874	13.8345	4.5889
	0.772	0.128	72.2874	13.8344	4.5889
	0.772	0.156	72.2874	13.8344	4.58889
	0.772	0.184	72.2874	13.8344	4.5889
	0.772	0.212	72.2874	13.8344	4.5889
	0.772	0.24	72.2874	13.8344	4.5889
	0.772	0.268	72.2874	13.8344	4.58889
	0.772	0.296	72.2874	13.8344	4.5889
	0.772	0.324	72.2874	13.8344	4.5889
	0.772	0.352	72.2874	13.8345	4.5889
	0.772	0.38	72.2874	13.8344	4.58889
	0.772	0.408	72.2874	13.8344	4.5889
	0.772	0.436	72.2874	13.8344	4.58889
	0.772	0.464	72.2874	13.8344	4.5889
	0.772	0.492	72.2874	13.8345	4.5889
	0.772	0.52	72.2874	13.8344	4.5889
	0.772	0.548	72.2874	13.8344	4.5889
	0.772	0.576	72.2874	13.8344	4.5889
	0.772	0.604	72.2874	13.8344	4.58889
	0.772	0.632	72.2874	13.8344	4.5889
	0.772	0.66	72.2874	13.8344	4.5889
	0.772	0.688	72.2874	13.8344	4.58889
	0.772	0.716	72.2874	13.8344	4.58889
	0.772	0.744	72.2874	13.8345	4.5889
	0.772	0.772	72.2874	13.8344	4.5889
	0.772	0.8	72.2874	13.8344	4.58889
	0.772	0.828	72.2874	13.8344	4.5889
	0.772	0.856	72.2874	13.8345	4.5889
	0.772	0.884	72.2874	13.8345	4.5889
	0.772	0.912	72.2874	13.8344	4.58889
	0.772	0.94	72.2874	13.8344	4.58889
	0.772	0.968	72.2874	13.8344	4.5889
	0.772	0.996	72.2874	13.8344	4.58889
	0.772	1.024	72.2874	13.8344	4.58889
	0.772	1.052	72.2874	13.8344	4.58889
	0.772	1.08	72.2874	13.8344	4.5889
	0.772	1.108	72.2874	13.8344	4.5889
	0.772	1.136	72.2874	13.8344	4.58889
	0.772	1.164	72.2874	13.8344	4.58889
	0.772	1.192	72.2874	13.8344	4.5889
	0.772	1.22	72.2874	13.8344	4.58889
	0.772	1.248	72.2874	13.8344	4.5889
	0.772	1.276	72.2874	13.8344	4.58889
	0.772	1.304	72.2874	13.8344	4.5889
	0.772	1.332	72.2874	13.8344	4.5889
	0.772	1.36	72.2874	13.8344	4.5889
	0.772	1.388	72.2874	13.8344	4.58889
	0.772	1.416	72.2874	13.8344	4.58889
	0.772	1.444	72.2874	13.8344	4.58889
	0.772	1.472	72.2874	13.8345	4.5889
	0.772	1.5	72.2874	13.8344	4.58889
	0.8	0.128	72.2874	13.8345	4.5889
	0.8	0.156	72.2874	13.8345	4.5889
	0.8	0.184	72.2874	13.8344	4.5889
	0.8	0.212	72.2874	13.8344	4.5889
	0.8	0.24	72.2874	13.8344	4.58889
	0.8	0.268	72.2874	13.8344	4.5889
	0.8	0.296	72.2874	13.8344	4.58889
	0.8	0.324	72.2874	13.8344	4.5889
	0.8	0.352	72.2874	13.8344	4.5889
	0.8	0.38	72.2874	13.8344	4.5889
	0.8	0.408	72.2874	13.8344	4.58889
	0.8	0.436	72.2874	13.8345	4.5889
	0.8	0.464	72.2874	13.8345	4.5889
	0.8	0.492	72.2874	13.8344	4.5889
	0.8	0.52	72.2874	13.8344	4.5889
	0.8	0.548	72.2874	13.8344	4.58889
	0.8	0.576	72.2874	13.8345	4.5889
	0.8	0.604	72.2874	13.8344	4.5889
	0.8	0.632	72.2874	13.8344	4.5889
	0.8	0.66	72.2874	13.8344	4.58889
	0.8	0.688	72.2874	13.8344	4.58889
	0.8	0.716	72.2874	13.8344	4.5889
	0.8	0.744	72.2874	13.8344	4.5889
	0.8	0.772	72.2874	13.8345	4.5889
	0.8	0.8	72.2874	13.8344	4.58889
	0.8	0.828	72.2874	13.8344	4.58889
	0.8	0.856	72.2874	13.8345	4.5889
	0.8	0.884	72.2874	13.8344	4.58889
	0.8	0.912	72.2874	13.8345	4.5889
	0.8	0.94	72.2874	13.8345	4.5889
	0.8	0.968	72.2874	13.8344	4.58889
	0.8	0.996	72.2874	13.8344	4.5889
	0.8	1.024	72.2874	13.8344	4.58889
	0.8	1.052	72.2874	13.8344	4.5889
	0.8	1.08	72.2874	13.8345	4.5889
	0.8	1.108	72.2874	13.8344	4.5889
	0.8	1.136	72.2874	13.8345	4.5889
	0.8	1.164	72.2874	13.8344	4.5889
	0.8	1.192	72.2874	13.8344	4.5889
	0.8	1.22	72.2874	13.8345	4.5889
	0.8	1.248	72.2874	13.8344	4.58889
	0.8	1.276	72.2874	13.8344	4.5889
	0.8	1.304	72.2874	13.8344	4.5889
	0.8	1.332	72.2874	13.8344	4.58889
	0.8	1.36	72.2874	13.8344	4.58889
	0.8	1.388	72.2874	13.8344	4.5889
	0.8	1.416	72.2874	13.8344	4.58889
	0.8	1.444	72.2874	13.8344	4.5889
	0.8	1.472	72.2874	13.8344	4.5889
	0.8	1.5	72.2874	13.8344	4.5889
	0.828	0.128	72.2874	13.8344	4.5889
	0.828	0.156	72.2874	13.8344	4.5889
	0.828	0.184	72.2874	13.8344	4.5889
	0.828	0.212	72.2874	13.8345	4.5889
	0.828	0.24	72.2874	13.8344	4.58889
	0.828	0.268	72.2874	13.8344	4.5889
	0.828	0.296	72.2874	13.8344	4.58889
	0.828	0.324	72.2874	13.8344	4.5889
	0.828	0.352	72.2874	13.8344	4.58889
	0.828	0.38	72.2874	13.8344	4.5889
	0.828	0.408	72.2874	13.8344	4.58889
	0.828	0.436	72.2874	13.8344	4.5889
	0.828	0.464	72.2874	13.8345	4.5889
	0.828	0.492	72.2874	13.8345	4.5889
	0.828	0.52	72.2874	13.8344	4.5889
	0.828	0.548	72.2874	13.8344	4.58889
	0.828	0.576	72.2874	13.8344	4.58889
	0.828	0.604	72.2874	13.8344	4.5889
	0.828	0.632	72.2874	13.8344	4.58889
	0.828	0.66	72.2874	13.8344	4.58889
	0.828	0.688	72.2874	13.8344	4.5889
	0.828	0.716	72.2874	13.8345	4.5889
	0.828	0.744	72.2874	13.8344	4.5889
	0.828	0.772	72.2874	13.8344	4.5889
	0.828	0.8	72.2874	13.8344	4.5889
	0.828	0.828	72.2874	13.8344	4.58889
	0.828	0.856	72.2874	13.8344	4.58889
	0.828	0.884	72.2874	13.8344	4.5889
	0.828	0.912	72.2874	13.8345	4.5889
	0.828	0.94	72.2874	13.8344	4.58889
	0.828	0.968	72.2874	13.8344	4.5889
	0.828	0.996	72.2874	13.8344	4.5889
	0.828	1.024	72.2874	13.8345	4.5889
	0.828	1.052	72.2874	13.8344	4.58889
	0.828	1.08	72.2874	13.8344	4.58889
	0.828	1.108	72.2874	13.8344	4.5889
	0.828	1.136	72.2874	13.8345	4.5889
	0.828	1.164	72.2874	13.8345	4.5889
	0.828	1.192	72.2874	13.8344	4.5889
	0.828	1.22	72.2874	13.8345	4.5889
	0.828	1.248	72.2874	13.8344	4.5889
	0.828	1.276	72.2874	13.8345	4.5889
	0.828	1.304	72.2874	13.8344	4.5889
	0.828	1.332	72.2874	13.8344	4.5889
	0.828	1.36	72.2874	13.8344	4.58889
	0.828	1.388	72.2874	13.8344	4.58889
	0.828	1.416	72.2874	13.8344	4.58889
	0.828	1.444	72.2874	13.8344	4.5889
	0.828	1.472	72.2874	13.8344	4.5889
	0.828	1.5	72.2874	13.8344	4.58889
	0.856	0.128	72.2874	13.8344	4.58889
	0.856	0.156	72.2874	13.8344	4.5889
	0.856	0.184	72.2874	13.8344	4.5889
	0.856	0.212	72.2874	13.8344	4.5889
	0.856	0.24	72.2874	13.8344	4.5889
	0.856	0.268	72.2874	13.8345	4.5889
	0.856	0.296	72.2874	13.8344	4.5889
	0.856	0.324	72.2874	13.8345	4.5889
	0.856	0.352	72.2874	13.8344	4.58889
	0.856	0.38	72.2874	13.8344	4.58889
	0.856	0.408	72.2874	13.8345	4.5889
	0.856	0.436	72.2874	13.8345	4.5889
	0.856	0.464	72.2874	13.8345	4.5889
	0.856	0.492	72.2874	13.8345	4.5889
	0.856	0.52	72.2874	13.8345	4.5889
	0.856	0.548	72.2874	13.8344	4.5889
	0.856	0.576	72.2874	13.8345	4.5889
	0.856	0.604	72.2874	13.8344	4.5889
	0.856	0.632	72.2874	13.8344	4.5889
	0.856	0.66	72.2874	13.8344	4.5889
	0.856	0.688	72.2874	13.8344	4.58889
	0.856	0.716	72.2874	13.8344	4.5889
	0.856	0.744	72.2874	13.8345	4.5889
	0.856	0.772	72.2874	13.8344	4.5889
	0.856	0.8	72.2874	13.8344	4.5889
	0.856	0.828	72.2874	13.8344	4.58889
	0.856	0.856	72.2874	13.8344	4.58889
	0.856	0.884	72.2874	13.8344	4.5889
	0.856	0.912	72.2874	13.8345	4.5889
	0.856	0.94	72.2874	13.8345	4.5889
	0.856	0.968	72.2874	13.8345	4.5889
	0.856	0.996	72.2874	13.8344	4.5889
	0.856	1.024	72.2874	13.8344	4.58889
	0.856	1.052	72.2874	13.8344	4.5889
	0.856	1.08	72.2874	13.8344	4.5889
	0.856	1.108	72.2874	13.8344	4.58889
	0.856	1.136	72.2874	13.8344	4.58889
	0.856	1.164	72.2874	13.8344	4.5889
	0.856	1.192	72.2874	13.8345	4.5889
	0.856	1.22	72.2874	13.8344	4.5889
	0.856	1.248	72.2874	13.8344	4.5889
	0.856	1.276	72.2874	13.8344	4.58889
	0.856	1.304	72.2874	13.8344	4.5889
	0.856	1.332	72.2874	13.8344	4.5889
	0.856	1.36	72.2874	13.8344	4.5889
	0.856	1.388	72.2874	13.8344	4.5889
	0.856	1.416	72.2874	13.8344	4.5889
	0.856	1.444	72.2874	13.8344	4.58889
	0.856	1.472	72.2874	13.8344	4.5889
	0.856	1.5	72.2874	13.8344	4.58889
	0.884	0.128	72.2874	13.8344	4.58889
	0.884	0.156	72.2874	13.8344	4.58889
	0.884	0.184	72.2874	13.8344	4.58889
	0.884	0.212	72.2874	13.8344	4.5889
	0.884	0.24	72.2874	13.8344	4.5889
	0.884	0.268	72.2874	13.8345	4.5889
	0.884	0.296	72.2874	13.8344	4.58889
	0.884	0.324	72.2874	13.8344	4.58889
	0.884	0.352	72.2874	13.8344	4.5889
	0.884	0.38	72.2874	13.8344	4.58889
	0.884	0.408	72.2874	13.8344	4.5889
	0.884	0.436	72.2874	13.8344	4.5889
	0.884	0.464	72.2874	13.8344	4.58889
	0.884	0.492	72.2874	13.8344	4.5889
	0.884	0.52	72.2874	13.8345	4.5889
	0.884	0.548	72.2874	13.8344	4.5889
	0.884	0.576	72.2874	13.8344	4.5889
	0.884	0.604	72.2874	13.8344	4.5889
	0.884	0.632	72.2874	13.8344	4.58889
	0.884	0.66	72.2874	13.8344	4.5889
	0.884	0.688	72.2874	13.8344	4.58889
	0.884	0.716	72.2874	13.8345	4.5889
	0.884	0.744	72.2874	13.8344	4.5889
	0.884	0.772	72.2874	13.8344	4.5889
	0.884	0.8	72.2874	13.8344	4.5889
	0.884	0.828	72.2874	13.8344	4.58889
	0.884	0.856	72.2874	13.8344	4.5889
	0.884	0.884	72.2874	13.8344	4.5889
	0.884	0.912	72.2874	13.8344	4.5889
	0.884	0.94	72.2874	13.8344	4.5889
	0.884	0.968	72.2874	13.8344	4.5889
	0.884	0.996	72.2874	13.8344	4.58889
	0.884	1.024	72.2874	13.8344	4.5889
	0.884	1.052	72.2874	13.8344	4.5889
	0.884	1.08	72.2874	13.8345	4.5889
	0.884	1.108	72.2874	13.8344	4.5889
	0.884	1.136	72.2874	13.8344	4.5889
	0.884	1.164	72.2874	13.8345	4.5889
	0.884	1.192	72.2874	13.8344	4.58889
	0.884	1.22	72.2874	13.8345	4.5889
	0.884	1.248	72.2874	13.8344	4.58889
	0.884	1.276	72.2874	13.8345	4.5889
	0.884	1.304	72.2874	13.8344	4.58889
	0.884	1.332	72.2874	13.8344	4.5889
	0.884	1.36	72.2874	13.8344	4.58889
	0.884	1.388	72.2874	13.8345	4.5889
	0.884	1.416	72.2874	13.8344	4.58889
	0.884	1.444	72.2874	13.8344	4.58889
	0.884	1.472	72.2874	13.8345	4.5889
	0.884	1.5	72.2874	13.8344	4.5889
	0.912	0.128	72.2874	13.8344	4.58889
	0.912	0.156	72.2874	13.8344	4.5889
	0.912	0.184	72.2874	13.8344	4.58889
	0.912	0.212	72.2874	13.8344	4.58889
	0.912	0.24	72.2874	13.8344	4.5889
	0.912	0.268	72.2874	13.8344	4.5889
	0.912	0.296	72.2874	13.8344	4.5889
	0.912	0.324	72.2874	13.8344	4.5889
	0.912	0.352	72.2874	13.8344	4.5889
	0.912	0.38	72.2874	13.8344	4.5889
	0.912	0.408	72.2874	13.8345	4.5889
	0.912	0.436	72.2874	13.8344	4.58889
	0.912	0.464	72.2874	13.8345	4.5889
	0.912	0.492	72.2874	13.8345	4.5889
	0.912	0.52	72.2874	13.8344	4.5889
	0.912	0.548	72.2874	13.8344	4.58889
	0.912	0.576	72.2874	13.8344	4.58889
	0.912	0.604	72.2874	13.8345	4.5889
	0.912	0.632	72.2874	13.8345	4.5889
	0.912	0.66	72.2874	13.8344	4.5889
	0.912	0.688	72.2874	13.8344	4.5889
	0.912	0.716	72.2874	13.8344	4.5889
	0.912	0.744	72.2874	13.8344	4.58889
	0.912	0.772	72.2874	13.8344	4.5889
	0.912	0.8	72.2874	13.8344	4.5889
	0.912	0.828	72.2874	13.8344	4.5889
	0.912	0.856	72.2874	13.8344	4.58889
	0.912	0.884	72.2874	13.8344	4.5889
	0.912	0.912	72.2874	13.8344	4.5889
	0.912	0.94	72.2874	13.8345	4.5889
	0.912	0.968	72.2874	13.8344	4.5889
	0.912	0.996	72.2874	13.8344	4.58889
	0.912	1.024	72.2874	13.8344	4.5889
	0.912	1.052	72.2874	13.8344	4.58889
	0.912	1.08	72.2874	13.8344	4.5889
	0.912	1.108	72.2874	13.8344	4.5889
	0.912	1.136	72.2874	13.8344	4.5889
	0.912	1.164	72.2874	13.8344	4.5889
	0.912	1.192	72.2874	13.8345	4.5889
	0.912	1.22	72.2874	13.8344	4.58889
	0.912	1.248	72.2874	13.8344	4.5889
	0.912	1.276	72.2874	13.8344	4.5889
	0.912	1.304	72.2874	13.8345	4.5889
	0.912	1.332	72.2874	13.8344	4.58889
	0.912	1.36	72.2874	13.8344	4.5889
	0.912	1.388	72.2874	13.8344	4.58889
	0.912	1.416	72.2874	13.8344	4.5889
	0.912	1.444	72.2874	13.8344	4.5889
	0.912	1.472	72.2874	13.8344	4.5889
	0.912	1.5	72.2874	13.8345	4.5889
	0.94	0.128	72.2874	13.8344	4.58889
	0.94	0.156	72.2874	13.8344	4.5889
	0.94	0.184	72.2874	13.8344	4.5889
	0.94	0.212	72.2874	13.8344	4.58889
	0.94	0.24	72.2874	13.8344	4.5889
	0.94	0.268	72.2874	13.8344	4.58889
	0.94	0.296	72.2874	13.8344	4.5889
	0.94	0.324	72.2874	13.8344	4.5889
	0.94	0.352	72.2874	13.8344	4.58889
	0.94	0.38	72.2874	13.8344	4.5889
	0.94	0.408	72.2874	13.8344	4.5889
	0.94	0.436	72.2874	13.8344	4.58889
	0.94	0.464	72.2874	13.8344	4.5889
	0.94	0.492	72.2874	13.8344	4.5889
	0.94	0.52	72.2874	13.8344	4.5889
	0.94	0.548	72.2874	13.8345	4.5889
	0.94	0.576	72.2874	13.8344	4.5889
	0.94	0.604	72.2874	13.8344	4.58889
	0.94	0.632	72.2874	13.8344	4.5889
	0.94	0.66	72.2874	13.8345	4.5889
	0.94	0.688	72.2874	13.8344	4.5889
	0.94	0.716	72.2874	13.8344	4.5889
	0.94	0.744	72.2874	13.8344	4.5889
	0.94	0.772	72.2874	13.8344	4.58889
	0.94	0.8	72.2874	13.8344	4.58889
	0.94	0.828	72.2874	13.8345	4.5889
	0.94	0.856	72.2874	13.8344	4.5889
	0.94	0.884	72.2874	13.8344	4.5889
	0.94	0.912	72.2874	13.8344	4.58889
	0.94	0.94	72.2874	13.8344	4.5889
	0.94	0.968	72.2874	13.8345	4.5889
	0.94	0.996	72.2874	13.8344	4.58889
	0.94	1.024	72.2874	13.8344	4.58889
	0.94	1.052	72.2874	13.8344	4.58889
	0.94	1.08	72.2874	13.8344	4.58889
	0.94	1.108	72.2874	13.8344	4.58889
	0.94	1.136	72.2874	13.8344	4.58889
	0.94	1.164	72.2874	13.8344	4.5889
	0.94	1.192	72.2874	13.8344	4.58889
	0.94	1.22	72.2874	13.8344	4.58889
	0.94	1.248	72.2874	13.8344	4.5889
	0.94	1.276	72.2874	13.8344	4.5889
	0.94	1.304	72.2874	13.8345	4.5889
	0.94	1.332	72.2874	13.8344	4.58889
	0.94	1.36	72.2874	13.8344	4.58889
	0.94	1.388	72.2874	13.8344	4.5889
	0.94	1.416	72.2874	13.8344	4.5889
	0.94	1.444	72.2874	13.8344	4.5889
	0.94	1.472	72.2874	13.8345	4.5889
	0.94	1.5	72.2874	13.8344	4.5889
	0.968	0.128	72.2874	13.8345	4.5889
	0.968	0.156	72.2874	13.8345	4.5889
	0.968	0.184	72.2874	13.8344	4.5889
	0.968	0.212	72.2874	13.8344	4.5889
	0.968	0.24	72.2874	13.8344	4.5889
	0.968	0.268	72.2874	13.8344	4.58889
	0.968	0.296	72.2874	13.8344	4.5889
	0.968	0.324	72.2874	13.8344	4.58889
	0.968	0.352	72.2874	13.8344	4.5889
	0.968	0.38	72.2874	13.8344	4.58889
	0.968	0.408	72.2874	13.8344	4.5889
	0.968	0.436	72.2874	13.8345	4.5889
	0.968	0.464	72.2874	13.8344	4.58889
	0.968	0.492	72.2874	13.8344	4.5889
	0.968	0.52	72.2874	13.8344	4.5889
	0.968	0.548	72.2874	13.8344	4.5889
	0.968	0.576	72.2874	13.8344	4.58889
	0.968	0.604	72.2874	13.8345	4.5889
	0.968	0.632	72.2874	13.8345	4.5889
	0.968	0.66	72.2874	13.8345	4.5889
	0.968	0.688	72.2874	13.8344	4.58889
	0.968	0.716	72.2874	13.8344	4.58889
	0.968	0.744	72.2874	13.8344	4.5889
	0.968	0.772	72.2874	13.8345	4.5889
	0.968	0.8	72.2874	13.8344	4.58889
	0.968	0.828	72.2874	13.8344	4.5889
	0.968	0.856	72.2874	13.8344	4.58889
	0.968	0.884	72.2874	13.8345	4.5889
	0.968	0.912	72.2874	13.8344	4.5889
	0.968	0.94	72.2874	13.8345	4.5889
	0.968	0.968	72.2874	13.8344	4.58889
	0.968	0.996	72.2874	13.8344	4.58889
	0.968	1.024	72.2874	13.8344	4.58889
	0.968	1.052	72.2874	13.8344	4.5889
	0.968	1.08	72.2874	13.8345	4.5889
	0.968	1.108	72.2874	13.8344	4.5889
	0.968	1.136	72.2874	13.8344	4.58889
	0.968	1.164	72.2874	13.8344	4.58889
	0.968	1.192	72.2874	13.8344	4.58889
	0.968	1.22	72.2874	13.8345	4.5889
	0.968	1.248	72.2874	13.8344	4.5889
	0.968	1.276	72.2874	13.8344	4.5889
	0.968	1.304	72.2874	13.8345	4.5889
	0.968	1.332	72.2874	13.8345	4.5889
	0.968	1.36	72.2874	13.8345	4.5889
	0.968	1.388	72.2874	13.8344	4.5889
	0.968	1.416	72.2874	13.8344	4.58889
	0.968	1.444	72.2874	13.8344	4.5889
	0.968	1.472	72.2874	13.8344	4.5889
	0.968	1.5	72.2874	13.8344	4.5889
	0.996	0.128	72.2874	13.8345	4.5889
	0.996	0.156	72.2874	13.8344	4.58889
	0.996	0.184	72.2874	13.8344	4.5889
	0.996	0.212	72.2874	13.8344	4.58889
	0.996	0.24	72.2874	13.8344	4.58889
	0.996	0.268	72.2874	13.8344	4.5889
	0.996	0.296	72.2874	13.8344	4.58889
	0.996	0.324	72.2874	13.8344	4.5889
	0.996	0.352	72.2874	13.8345	4.5889
	0.996	0.38	72.2874	13.8345	4.5889
	0.996	0.408	72.2874	13.8345	4.5889
	0.996	0.436	72.2874	13.8344	4.5889
	0.996	0.464	72.2874	13.8344	4.58889
	0.996	0.492	72.2874	13.8344	4.5889
	0.996	0.52	72.2874	13.8344	4.5889
	0.996	0.548	72.2874	13.8344	4.5889
	0.996	0.576	72.2874	13.8345	4.5889
	0.996	0.604	72.2874	13.8344	4.5889
	0.996	0.632	72.2874	13.8344	4.5889
	0.996	0.66	72.2874	13.8345	4.5889
	0.996	0.688	72.2874	13.8344	4.5889
	0.996	0.716	72.2874	13.8344	4.58889
	0.996	0.744	72.2874	13.8344	4.5889
	0.996	0.772	72.2874	13.8344	4.58889
	0.996	0.8	72.2874	13.8344	4.58889
	0.996	0.828	72.2874	13.8344	4.5889
	0.996	0.856	72.2874	13.8344	4.58889
	0.996	0.884	72.2874	13.8344	4.58889
	0.996	0.912	72.2874	13.8344	4.5889
	0.996	0.94	72.2874	13.8344	4.58889
	0.996	0.968	72.2874	13.8344	4.5889
	0.996	0.996	72.2874	13.8344	4.58889
	0.996	1.024	72.2874	13.8344	4.58889
	0.996	1.052	72.2874	13.8344	4.5889
	0.996	1.08	72.2874	13.8344	4.58889
	0.996	1.108	72.2874	13.8344	4.58889
	0.996	1.136	72.2874	13.8345	4.5889
	0.996	1.164	72.2874	13.8344	4.58889
	0.996	1.192	72.2874	13.8344	4.58889
	0.996	1.22	72.2874	13.8344	4.58889
	0.996	1.248	72.2874	13.8344	4.58889
	0.996	1.276	72.2874	13.8345	4.5889
	0.996	1.304	72.2874	13.8344	4.58889
	0.996	1.332	72.2874	13.8344	4.5889
	0.996	1.36	72.2874	13.8344	4.5889
	0.996	1.388	72.2874	13.8344	4.58889
	0.996	1.416	72.2874	13.8344	4.58889
	0.996	1.444	72.2874	13.8344	4.58889
	0.996	1.472	72.2874	13.8344	4.5889
	0.996	1.5	72.2874	13.8344	4.5889
	1.024	0.128	72.2874	13.8344	4.5889
	1.024	0.156	72.2874	13.8344	4.58889
	1.024	0.184	72.2874	13.8344	4.58889
	1.024	0.212	72.2874	13.8344	4.5889
	1.024	0.24	72.2874	13.8344	4.58889
	1.024	0.268	72.2874	13.8344	4.5889
	1.024	0.296	72.2874	13.8344	4.5889
	1.024	0.324	72.2874	13.8345	4.5889
	1.024	0.352	72.2874	13.8344	4.58889
	1.024	0.38	72.2874	13.8344	4.5889
	1.024	0.408	72.2874	13.8344	4.5889
	1.024	0.436	72.2874	13.8344	4.5889
	1.024	0.464	72.2874	13.8344	4.58889
	1.024	0.492	72.2874	13.8344	4.5889
	1.024	0.52	72.2874	13.8344	4.5889
	1.024	0.548	72.2874	13.8344	4.5889
	1.024	0.576	72.2874	13.8345	4.5889
	1.024	0.604	72.2874	13.8344	4.58889
	1.024	0.632	72.2874	13.8345	4.5889
	1.024	0.66	72.2874	13.8344	4.58889
	1.024	0.688	72.2874	13.8345	4.5889
	1.024	0.716	72.2874	13.8344	4.5889
	1.024	0.744	72.2874	13.8344	4.58889
	1.024	0.772	72.2874	13.8344	4.58889
	1.024	0.8	72.2874	13.8345	4.5889
	1.024	0.828	72.2874	13.8344	4.58889
	1.024	0.856	72.2874	13.8344	4.58889
	1.024	0.884	72.2874	13.8345	4.5889
	1.024	0.912	72.2874	13.8344	4.5889
	1.024	0.94	72.2874	13.8344	4.58889
	1.024	0.968	72.2874	13.8344	4.58889
	1.024	0.996	72.2874	13.8344	4.5889
	1.024	1.024	72.2874	13.8344	4.58889
	1.024	1.052	72.2874	13.8344	4.5889
	1.024	1.08	72.2874	13.8345	4.5889
	1.024	1.108	72.2874	13.8344	4.5889
	1.024	1.136	72.2874	13.8344	4.5889
	1.024	1.164	72.2874	13.8345	4.5889
	1.024	1.192	72.2874	13.8344	4.58889
	1.024	1.22	72.2874	13.8344	4.58889
	1.024	1.248	72.2874	13.8344	4.58889
	1.024	1.276	72.2874	13.8344	4.5889
	1.024	1.304	72.2874	13.8344	4.5889
	1.024	1.332	72.2874	13.8344	4.5889
	1.024	1.36	72.2874	13.8344	4.5889
	1.024	1.388	72.2874	13.8344	4.58889
	1.024	1.416	72.2874	13.8344	4.5889
	1.024	1.444	72.2874	13.8344	4.58889
	1.024	1.472	72.2874	13.8344	4.5889
	1.024	1.5	72.2874	13.8344	4.5889
	1.052	0.128	72.2874	13.8344	4.5889
	1.052	0.156	72.2874	13.8344	4.58889
	1.052	0.184	72.2874	13.8344	4.5889
	1.052	0.212	72.2874	13.8344	4.5889
	1.052	0.24	72.2874	13.8345	4.5889
	1.052	0.268	72.2874	13.8344	4.5889
	1.052	0.296	72.2874	13.8344	4.5889
	1.052	0.324	72.2874	13.8344	4.58889
	1.052	0.352	72.2874	13.8344	4.5889
	1.052	0.38	72.2874	13.8344	4.5889
	1.052	0.408	72.2874	13.8344	4.58889
	1.052	0.436	72.2874	13.8344	4.58889
	1.052	0.464	72.2874	13.8345	4.5889
	1.052	0.492	72.2874	13.8344	4.58889
	1.052	0.52	72.2874	13.8345	4.5889
	1.052	0.548	72.2874	13.8344	4.5889
	1.052	0.576	72.2874	13.8344	4.5889
	1.052	0.604	72.2874	13.8345	4.5889
	1.052	0.632	72.2874	13.8344	4.5889
	1.052	0.66	72.2874	13.8344	4.5889
	1.052	0.688	72.2874	13.8344	4.5889
	1.052	0.716	72.2874	13.8345	4.5889
	1.052	0.744	72.2874	13.8344	4.5889
	1.052	0.772	72.2874	13.8344	4.58889
	1.052	0.8	72.2874	13.8344	4.5889
	1.052	0.828	72.2874	13.8345	4.5889
	1.052	0.856	72.2874	13.8344	4.58889
	1.052	0.884	72.2874	13.8344	4.58889
	1.052	0.912	72.2874	13.8344	4.58889
	1.052	0.94	72.2874	13.8345	4.5889
	1.052	0.968	72.2874	13.8344	4.58889
	1.052	0.996	72.2874	13.8344	4.5889
	1.052	1.024	72.2874	13.8345	4.5889
	1.052	1.052	72.2874	13.8344	4.5889
	1.052	1.08	72.2874	13.8344	4.5889
	1.052	1.108	72.2874	13.8344	4.58889
	1.052	1.136	72.2874	13.8344	4.58889
	1.052	1.164	72.2874	13.8344	4.58889
	1.052	1.192	72.2874	13.8344	4.5889
	1.052	1.22	72.2874	13.8344	4.5889
	1.052	1.248	72.2874	13.8345	4.5889
	1.052	1.276	72.2874	13.8344	4.5889
	1.052	1.304	72.2874	13.8345	4.5889
	1.052	1.332	72.2874	13.8344	4.58889
	1.052	1.36	72.2874	13.8344	4.5889
	1.052	1.388	72.2874	13.8344	4.58889
	1.052	1.416	72.2874	13.8344	4.5889
	1.052	1.444	72.2874	13.8344	4.58889
	1.052	1.472	72.2874	13.8344	4.58889
	1.052	1.5	72.2874	13.8344	4.5889
	1.08	0.128	72.2874	13.8344	4.5889
	1.08	0.156	72.2874	13.8344	4.5889
	1.08	0.184	72.2874	13.8344	4.5889
	1.08	0.212	72.2874	13.8344	4.5889
	1.08	0.24	72.2874	13.8344	4.58889
	1.08	0.268	72.2874	13.8344	4.5889
	1.08	0.296	72.2874	13.8344	4.5889
	1.08	0.324	72.2874	13.8344	4.5889
	1.08	0.352	72.2874	13.8344	4.5889
	1.08	0.38	72.2874	13.8344	4.5889
	1.08	0.408	72.2874	13.8345	4.5889
	1.08	0.436	72.2874	13.8344	4.5889
	1.08	0.464	72.2874	13.8344	4.5889
	1.08	0.492	72.2874	13.8344	4.5889
	1.08	0.52	72.2874	13.8344	4.5889
	1.08	0.548	72.2874	13.8344	4.58889
	1.08	0.576	72.2874	13.8345	4.5889
	1.08	0.604	72.2874	13.8345	4.5889
	1.08	0.632	72.2874	13.8344	4.58889
	1.08	0.66	72.2874	13.8344	4.58889
	1.08	0.688	72.2874	13.8345	4.5889
	1.08	0.716	72.2874	13.8345	4.5889
	1.08	0.744	72.2874	13.8344	4.58889
	1.08	0.772	72.2874	13.8344	4.58889
	1.08	0.8	72.2874	13.8344	4.58889
	1.08	0.828	72.2874	13.8344	4.5889
	1.08	0.856	72.2874	13.8344	4.5889
	1.08	0.884	72.2874	13.8345	4.5889
	1.08	0.912	72.2874	13.8344	4.5889
	1.08	0.94	72.2874	13.8344	4.58889
	1.08	0.968	72.2874	13.8344	4.58889
	1.08	0.996	72.2874	13.8344	4.5889
	1.08	1.024	72.2874	13.8344	4.58889
	1.08	1.052	72.2874	13.8345	4.5889
	1.08	1.08	72.2874	13.8344	4.5889
	1.08	1.108	72.2874	13.8344	4.58889
	1.08	1.136	72.2874	13.8344	4.58889
	1.08	1.164	72.2874	13.8344	4.58889
	1.08	1.192	72.2874	13.8344	4.58889
	1.08	1.22	72.2874	13.8344	4.58889
	1.08	1.248	72.2874	13.8345	4.5889
	1.08	1.276	72.2874	13.8345	4.5889
	1.08	1.304	72.2874	13.8344	4.58889
	1.08	1.332	72.2874	13.8344	4.5889
	1.08	1.36	72.2874	13.8344	4.5889
	1.08	1.388	72.2874	13.8344	4.5889
	1.08	1.416	72.2874	13.8344	4.5889
	1.08	1.444	72.2874	13.8344	4.58889
	1.08	1.472	72.2874	13.8344	4.5889
	1.08	1.5	72.2874	13.8344	4.58889
	1.108	0.128	72.2874	13.8344	4.5889
	1.108	0.156	72.2874	13.8345	4.5889
	1.108	0.184	72.2874	13.8344	4.5889
	1.108	0.212	72.2874	13.8345	4.5889
	1.108	0.24	72.2874	13.8344	4.5889
	1.108	0.268	72.2874	13.8344	4.5889
	1.108	0.296	72.2874	13.8344	4.5889
	1.108	0.324	72.2874	13.8344	4.58889
	1.108	0.352	72.2874	13.8344	4.58889
	1.108	0.38	72.2874	13.8344	4.5889
	1.108	0.408	72.2874	13.8344	4.58889
	1.108	0.436	72.2874	13.8344	4.58889
	1.108	0.464	72.2874	13.8344	4.58889
	1.108	0.492	72.2874	13.8345	4.5889
	1.108	0.52	72.2874	13.8344	4.58889
	1.108	0.548	72.2874	13.8344	4.58889
	1.108	0.576	72.2874	13.8344	4.5889
	1.108	0.604	72.2874	13.8344	4.5889
	1.108	0.632	72.2874	13.8344	4.5889
	1.108	0.66	72.2874	13.8344	4.58889
	1.108	0.688	72.2874	13.8345	4.5889
	1.108	0.716	72.2874	13.8344	4.5889
	1.108	0.744	72.2874	13.8345	4.5889
	1.108	0.772	72.2874	13.8345	4.5889
	1.108	0.8	72.2874	13.8344	4.58889
	1.108	0.828	72.2874	13.8344	4.5889
	1.108	0.856	72.2874	13.8344	4.58889
	1.108	0.884	72.2874	13.8344	4.58889
	1.108	0.912	72.2874	13.8345	4.5889
	1.108	0.94	72.2874	13.8344	4.58889
	1.108	0.968	72.2874	13.8344	4.58889
	1.108	0.996	72.2874	13.8344	4.5889
	1.108	1.024	72.2874	13.8345	4.5889
	1.108	1.052	72.2874	13.8345	4.5889
	1.108	1.08	72.2874	13.8344	4.5889
	1.108	1.108	72.2874	13.8344	4.58889
	1.108	1.136	72.2874	13.8344	4.58889
	1.108	1.164	72.2874	13.8344	4.58889
	1.108	1.192	72.2874	13.8344	4.58889
	1.108	1.22	72.2874	13.8344	4.58889
	1.108	1.248	72.2874	13.8344	4.58889
	1.108	1.276	72.2874	13.8344	4.5889
	1.108	1.304	72.2874	13.8344	4.5889
	1.108	1.332	72.2874	13.8345	4.5889
	1.108	1.36	72.2874	13.8344	4.58889
	1.108	1.388	72.2874	13.8345	4.5889
	1.108	1.416	72.2874	13.8344	4.5889
	1.108	1.444	72.2874	13.8344	4.5889
	1.108	1.472	72.2874	13.8344	4.5889
	1.108	1.5	72.2874	13.8344	4.5889
	1.136	0.128	72.2874	13.8344	4.58889
	1.136	0.156	72.2874	13.8344	4.58889
	1.136	0.184	72.2874	13.8344	4.5889
	1.136	0.212	72.2874	13.8345	4.5889
	1.136	0.24	72.2874	13.8344	4.58889
	1.136	0.268	72.2874	13.8344	4.58889
	1.136	0.296	72.2874	13.8344	4.58889
	1.136	0.324	72.2874	13.8344	4.5889
	1.136	0.352	72.2874	13.8344	4.58889
	1.136	0.38	72.2874	13.8344	4.58889
	1.136	0.408	72.2874	13.8344	4.58889
	1.136	0.436	72.2874	13.8344	4.58889
	1.136	0.464	72.2874	13.8344	4.58889
	1.136	0.492	72.2874	13.8345	4.5889
	1.136	0.52	72.2874	13.8344	4.5889
	1.136	0.548	72.2874	13.8344	4.5889
	1.136	0.576	72.2874	13.8344	4.58889
	1.136	0.604	72.2874	13.8345	4.5889
	1.136	0.632	72.2874	13.8344	4.5889
	1.136	0.66	72.2874	13.8344	4.58889
	1.136	0.688	72.2874	13.8344	4.5889
	1.136	0.716	72.2874	13.8344	4.58889
	1.136	0.744	72.2874	13.8345	4.5889
	1.136	0.772	72.2874	13.8344	4.5889
	1.136	0.8	72.2874	13.8344	4.58889
	1.136	0.828	72.2874	13.8344	4.58889
	1.136	0.856	72.2874	13.8344	4.5889
	1.136	0.884	72.2874	13.8344	4.5889
	1.136	0.912	72.2874	13.8344	4.58889
	1.136	0.94	72.2874	13.8344	4.5889
	1.136	0.968	72.2874	13.8344	4.5889
	1.136	0.996	72.2874	13.8344	4.5889
	1.136	1.024	72.2874	13.8345	4.5889
	1.136	1.052	72.2874	13.8344	4.58889
	1.136	1.08	72.2874	13.8344	4.58889
	1.136	1.108	72.2874	13.8344	4.58889
	1.136	1.136	72.2874	13.8344	4.58889
	1.136	1.164	72.2874	13.8344	4.5889
	1.136	1.192	72.2874	13.8344	4.5889
	1.136	1.22	72.2874	13.8345	4.5889
	1.136	1.248	72.2874	13.8344	4.5889
	1.136	1.276	72.2874	13.8344	4.58889
	1.136	1.304	72.2874	13.8344	4.58889
	1.136	1.332	72.2874	13.8344	4.58889
	1.136	1.36	72.2874	13.8345	4.5889
	1.136	1.388	72.2874	13.8344	4.5889
	1.136	1.416	72.2874	13.8344	4.58889
	1.136	1.444	72.2874	13.8344	4.5889
	1.136	1.472	72.2874	13.8344	4.5889
	1.136	1.5	72.2874	13.8344	4.58889
	1.164	0.128	72.2874	13.8344	4.5889
	1.164	0.156	72.2874	13.8344	4.5889
	1.164	0.184	72.2874	13.8344	4.58889
	1.164	0.212	72.2874	13.8344	4.58889
	1.164	0.24	72.2874	13.8344	4.5889
	1.164	0.268	72.2874	13.8345	4.5889
	1.164	0.296	72.2874	13.8344	4.58889
	1.164	0.324	72.2874	13.8344	4.5889
	1.164	0.352	72.2874	13.8344	4.5889
	1.164	0.38	72.2874	13.8345	4.5889
	1.164	0.408	72.2874	13.8344	4.58889
	1.164	0.436	72.2874	13.8344	4.58889
	1.164	0.464	72.2874	13.8344	4.5889
	1.164	0.492	72.2874	13.8344	4.58889
	1.164	0.52	72.2874	13.8345	4.5889
	1.164	0.548	72.2874	13.8344	4.58889
	1.164	0.576	72.2874	13.8344	4.58889
	1.164	0.604	72.2874	13.8344	4.5889
	1.164	0.632	72.2874	13.8345	4.5889
	1.164	0.66	72.2874	13.8344	4.58889
	1.164	0.688	72.2874	13.8344	4.5889
	1.164	0.716	72.2874	13.8344	4.5889
	1.164	0.744	72.2874	13.8345	4.5889
	1.164	0.772	72.2874	13.8345	4.5889
	1.164	0.8	72.2874	13.8344	4.5889
	1.164	0.828	72.2874	13.8344	4.58889
	1.164	0.856	72.2874	13.8344	4.5889
	1.164	0.884	72.2874	13.8344	4.5889
	1.164	0.912	72.2874	13.8345	4.5889
	1.164	0.94	72.2874	13.8345	4.5889
	1.164	0.968	72.2874	13.8344	4.5889
	1.164	0.996	72.2874	13.8344	4.5889
	1.164	1.024	72.2874	13.8344	4.5889
	1.164	1.052	72.2874	13.8344	4.5889
	1.164	1.08	72.2874	13.8344	4.5889
	1.164	1.108	72.2874	13.8344	4.58889
	1.164	1.136	72.2874	13.8344	4.5889
	1.164	1.164	72.2874	13.8345	4.5889
	1.164	1.192	72.2874	13.8344	4.5889
	1.164	1.22	72.2874	13.8345	4.5889
	1.164	1.248	72.2874	13.8344	4.5889
	1.164	1.276	72.2874	13.8344	4.5889
	1.164	1.304	72.2874	13.8344	4.5889
	1.164	1.332	72.2874	13.8344	4.58889
	1.164	1.36	72.2874	13.8344	4.5889
	1.164	1.388	72.2874	13.8344	4.5889
	1.164	1.416	72.2874	13.8344	4.5889
	1.164	1.444	72.2874	13.8344	4.58889
	1.164	1.472	72.2874	13.8344	4.5889
	1.164	1.5	72.2874	13.8344	4.5889
	1.192	0.128	72.2874	13.8344	4.5889
	1.192	0.156	72.2874	13.8345	4.5889
	1.192	0.184	72.2874	13.8344	4.5889
	1.192	0.212	72.2874	13.8344	4.58889
	1.192	0.24	72.2874	13.8345	4.5889
	1.192	0.268	72.2874	13.8344	4.5889
	1.192	0.296	72.2874	13.8344	4.5889
	1.192	0.324	72.2874	13.8344	4.58889
	1.192	0.352	72.2874	13.8344	4.5889
	1.192	0.38	72.2874	13.8344	4.58889
	1.192	0.408	72.2874	13.8344	4.58889
	1.192	0.436	72.2874	13.8344	4.5889
	1.192	0.464	72.2874	13.8344	4.58889
	1.192	0.492	72.2874	13.8344	4.58889
	1.192	0.52	72.2874	13.8344	4.5889
	1.192	0.548	72.2874	13.8344	4.58889
	1.192	0.576	72.2874	13.8344	4.58889
	1.192	0.604	72.2874	13.8344	4.5889
	1.192	0.632	72.2874	13.8345	4.5889
	1.192	0.66	72.2874	13.8344	4.58889
	1.192	0.688	72.2874	13.8344	4.5889
	1.192	0.716	72.2874	13.8344	4.5889
	1.192	0.744	72.2874	13.8344	4.5889
	1.192	0.772	72.2874	13.8345	4.5889
	1.192	0.8	72.2874	13.8344	4.5889
	1.192	0.828	72.2874	13.8344	4.5889
	1.192	0.856	72.2874	13.8344	4.5889
	1.192	0.884	72.2874	13.8345	4.5889
	1.192	0.912	72.2874	13.8344	4.5889
	1.192	0.94	72.2874	13.8345	4.5889
	1.192	0.968	72.2874	13.8344	4.5889
	1.192	0.996	72.2874	13.8344	4.5889
	1.192	1.024	72.2874	13.8344	4.5889
	1.192	1.052	72.2874	13.8345	4.5889
	1.192	1.08	72.2874	13.8345	4.5889
	1.192	1.108	72.2874	13.8344	4.5889
	1.192	1.136	72.2874	13.8344	4.5889
	1.192	1.164	72.2874	13.8345	4.5889
	1.192	1.192	72.2874	13.8344	4.58889
	1.192	1.22	72.2874	13.8344	4.5889
	1.192	1.248	72.2874	13.8344	4.5889
	1.192	1.276	72.2874	13.8344	4.58889
	1.192	1.304	72.2874	13.8344	4.58889
	1.192	1.332	72.2874	13.8344	4.58889
	1.192	1.36	72.2874	13.8344	4.58889
	1.192	1.388	72.2874	13.8344	4.58889
	1.192	1.416	72.2874	13.8345	4.5889
	1.192	1.444	72.2874	13.8344	4.5889
	1.192	1.472	72.2874	13.8344	4.5889
	1.192	1.5	72.2874	13.8344	4.5889
	1.22	0.128	72.2874	13.8344	4.58889
	1.22	0.156	72.2874	13.8344	4.5889
	1.22	0.184	72.2874	13.8344	4.5889
	1.22	0.212	72.2874	13.8344	4.58889
	1.22	0.24	72.2874	13.8344	4.5889
	1.22	0.268	72.2874	13.8344	4.5889
	1.22	0.296	72.2874	13.8344	4.5889
	1.22	0.324	72.2874	13.8344	4.58889
	1.22	0.352	72.2874	13.8344	4.58889
	1.22	0.38	72.2874	13.8344	4.58889
	1.22	0.408	72.2874	13.8344	4.58889
	1.22	0.436	72.2874	13.8344	4.5889
	1.22	0.464	72.2874	13.8345	4.5889
	1.22	0.492	72.2874	13.8345	4.5889
	1.22	0.52	72.2874	13.8344	4.58889
	1.22	0.548	72.2874	13.8344	4.58889
	1.22	0.576	72.2874	13.8344	4.5889
	1.22	0.604	72.2874	13.8344	4.5889
	1.22	0.632	72.2874	13.8344	4.5889
	1.22	0.66	72.2874	13.8344	4.5889
	1.22	0.688	72.2874	13.8344	4.5889
	1.22	0.716	72.2874	13.8344	4.58889
	1.22	0.744	72.2874	13.8344	4.5889
	1.22	0.772	72.2874	13.8344	4.5889
	1.22	0.8	72.2874	13.8344	4.5889
	1.22	0.828	72.2874	13.8345	4.5889
	1.22	0.856	72.2874	13.8344	4.5889
	1.22	0.884	72.2874	13.8344	4.5889
	1.22	0.912	72.2874	13.8344	4.5889
	1.22	0.94	72.2874	13.8344	4.5889
	1.22	0.968	72.2874	13.8344	4.5889
	1.22	0.996	72.2874	13.8344	4.5889
	1.22	1.024	72.2874	13.8345	4.5889
	1.22	1.052	72.2874	13.8344	4.58889
	1.22	1.08	72.2874	13.8345	4.5889
	1.22	1.108	72.2874	13.8344	4.5889
	1.22	1.136	72.2874	13.8344	4.5889
	1.22	1.164	72.2874	13.8344	4.58889
	1.22	1.192	72.2874	13.8344	4.5889
	1.22	1.22	72.2874	13.8344	4.5889
	1.22	1.248	72.2874	13.8344	4.58889
	1.22	1.276	72.2874	13.8344	4.5889
	1.22	1.304	72.2874	13.8344	4.58889
	1.22	1.332	72.2874	13.8344	4.58889
	1.22	1.36	72.2874	13.8344	4.5889
	1.22	1.388	72.2874	13.8345	4.5889
	1.22	1.416	72.2874	13.8344	4.5889
[truncated: 508 more rows]

## Sheet: exLang
Non-modified competitive Langmuir model
Daten														Model							MPSD
P					Langmuir		Si					Langmuir		P				Si					P	P	Si	Si
c0	ce	qe	ce	qe	qm	KL	c0	ce	qe	ce	qe	qm	KL	ce	qe	qmax	KL,P	KL,Si	ce	qe			(q,exp-q,cal)/qexp^2		(q,exp-q,cal)/qexp^2
mg/L	µmol/L	µmol/g	mg/L	mg/g			mg/L	µmol/L	µmol/g	mg/L	mg/g										nm	np		MPSD		MPSD	MPSD,komp
4.973	115.194	335.006	3.571	10.3852	16.7	40	9.23	312.456	118.624	8.78	3.33333	28	0.6	3.571	12.8045	14.545	62.6558	3.35013	8.78	1.68332	33	3	0.054268	0.151589	0.245029	0.372441	52.403
4.973	70.5806	332.736	2.188	10.3148			9.23	298.007	112.825	8.374	3.17037			2.188	12.0015				8.374	2.45597			0.0267392		0.0507773
4.973	29.5161	290.896	0.915	9.01778			9.23	261.423	148.992	7.346	4.18667			0.915	10.0538				7.346	4.31581			0.0131999		0.000951517
4.973	6.70968	243.984	0.208	7.56349			9.23	218.221	174.999	6.132	4.91746			0.208	5.48241				6.132	8.64193			0.0757068		0.573651
5.102	115.548	363.202	3.582	11.2593			13.99	477.224	152.893	13.41	4.2963			3.582	12.0743				13.41	2.41694			0.00523983		0.191351
5.102	73.2903	338.112	2.272	10.4815			13.99	442.705	204.297	12.44	5.74074			2.272	11.1903				12.44	3.27609			0.0045735		0.184322
5.102	31.2903	296.201	0.97	9.18222			13.99	393.95	230.921	11.07	6.48889			0.97	8.94164				11.07	5.45625			0.000686465		0.0253255
5.102	9.83871	245.622	0.305	7.61429			13.99	332.633	262.272	9.347	7.36984			0.305	5.4052				9.347	8.85697			0.0841718		0.0407174
5.116	109.226	413.381	3.386	12.8148			9.197	312.918	106.498	8.793	2.99259			3.386	12.719				8.793	1.76605			5.5894e-05		0.167984
5.116	66.1613	366.189	2.051	11.3519			9.197	296.512	114.011	8.332	3.2037			2.051	11.8735				8.332	2.57908			0.00211198		0.0380131
5.116	26.0645	308.817	0.808	9.57333			9.197	264.057	140.53	7.42	3.94889			0.808	9.62758				7.42	4.72727			3.21032e-05		0.0388538
5.116	6.70968	251.306	0.208	7.79048			9.197	215.196	177.936	6.047	5			0.208	5.52793				6.047	8.59291			0.0843461		0.516361
5.107	114.548	371.804	3.551	11.5259			14.05	474.377	189.798	13.33	5.33333			3.551	12.0685				13.33	2.42232			0.00221558		0.297914
5.107	72.6129	341.219	2.251	10.5778			14.05	446.619	197.707	12.55	5.55556			2.251	11.1439				12.55	3.32206			0.00286478		0.161627
5.107	32.0323	294.91	0.993	9.14222			14.05	394.306	234.875	11.08	6.6			0.993	9.01914				11.08	5.38092			0.000181264		0.0341176
5.107	9.22581	246.851	0.286	7.65238			14.05	333.132	264.87	9.361	7.44286			0.286	5.18376				9.361	9.07198			0.104068		0.04791
4.864	116.032	302.748	3.597	9.38519			21.97	740.569	305.786	20.81	8.59259			3.597	11.0712				20.81	3.42473			0.0322715		0.361721
4.864	81.3871	279.689	2.523	8.67037			21.97	688.256	346.646	19.34	9.74074			2.523	10.2705				19.34	4.20952			0.0340603		0.322447
4.864	47.2903	243.584	1.466	7.55111			21.97	620.641	358.244	17.44	10.0667			1.466	8.83138				17.44	5.61749			0.0287463		0.195339
4.864	16.5161	222.837	0.512	6.90794			21.97	543.772	377.902	15.28	10.619			0.512	5.53699				15.28	8.83543			0.0393865		0.0282119
133.63	133.629	591.935	4.1425	18.35			0	0	0	0	0			4.1425	14.4892				0	0			0.0442674
133.63	109.952	550.255	3.4085	17.0579			0	0	0	0	0			3.4085	14.4772				0	0			0.0228883
133.63	81.3548	524.946	2.522	16.2733			0	0	0	0	0			2.522	14.4535				0	0			0.0125051
133.63	54.8871	460.732	1.7015	14.2827			0	0	0	0	0			1.7015	14.4098				0	0			7.92617e-05
133.63	13.8387	403.431	0.429	12.5063			0	0	0	0	0			0.429	14.0233				0	0			0.0147124
0	0	0	0	0			374.99	335.27	993.099	9.42109	27.9061			0	0				9.42109	14.0983					0.244821
0	0	0	0	0			374.99	302.395	907.487	8.49731	25.5004			0	0				8.49731	14.0514					0.201576
0	0	0	0	0			374.99	258.781	871.598	7.27175	24.4919			0	0				7.27175	13.9715					0.18451
0	0	0	0	0			374.99	222.208	763.933	6.24403	21.4665			0	0				6.24403	13.8814					0.124853
0	0	0	0	0			374.99	163.416	634.734	4.04	19.492			0	0				4.04	13.5443					0.093108
0	0	0	0	0			374.99	121.158	507.672	2.89	15.2947			0	0				2.89	13.1834					0.0190557
0	0	0	0	0			374.99	57.5136	476.221	1.62	13.376			0	0				1.62	12.282					0.00668963
0	0	0	0	0			374.99	29.0538	345.94	0.816412	9.72092			0	0				0.816412	10.6509					0.00915142

## Sheet: exLangbatch
	qmax	KL,P	KL,Si		qm,P	KL,P	KL,Si
				MPSD
irun
1	19	19	19	69.4391	13.5698	102.014	3.23578
2	19	19	28	69.4391	13.5699	101.98	3.2348
3	19	19	37	69.4391	13.5697	102.012	3.23572
4	19	19	46	69.4391	13.5699	101.962	3.23423
5	19	19	55	69.4391	13.5699	101.961	3.23431
6	19	19	64	69.4391	13.57	101.947	3.23395
7	19	19	73	69.4391	13.57	101.926	3.23325
8	19	19	82	69.4391	13.5697	101.998	3.23533
9	19	19	91	69.4391	13.5697	102.002	3.23545
10	19	19	100	69.4391	13.5697	102	3.2354
	19	28	19	69.4391	13.5698	101.988	3.23503
	19	28	28	69.4391	13.5699	101.98	3.23483
	19	28	37	69.4391	13.5699	102	3.23543
	19	28	46	69.4391	13.57	101.954	3.23404
	19	28	55	69.4391	13.5699	101.978	3.23462
	19	28	64	69.4391	13.5699	101.94	3.23365
	19	28	73	69.4391	13.57	101.932	3.2333
	19	28	82	69.4391	13.5701	101.969	3.2346
	19	28	91	69.4391	13.57	101.915	3.23288
	19	28	100	69.4391	13.5701	101.897	3.2323
	19	37	19	69.4391	13.5698	101.999	3.23537
	19	37	28	69.4391	13.5699	101.992	3.23511
	19	37	37	69.4391	13.5698	101.997	3.23542
	19	37	46	69.4391	13.5698	101.976	3.23463
	19	37	55	69.4391	13.5699	101.961	3.23415
	19	37	64	69.4391	13.5698	101.981	3.23482
	19	37	73	69.4391	13.57	101.942	3.23382
	19	37	82	69.4391	13.57	101.921	3.23305
	19	37	91	69.4391	13.5701	101.931	3.2332
	19	37	100	69.4391	13.5698	102.016	3.23579
	19	46	19	69.4391	13.5698	101.995	3.23523
	19	46	28	69.4391	13.5699	101.984	3.23498
	19	46	37	69.4391	13.5698	101.963	3.23434
	19	46	46	69.4391	13.5699	101.986	3.23502
	19	46	55	69.4391	13.57	101.948	3.23386
	19	46	64	69.4391	13.57	101.944	3.23379
	19	46	73	69.4391	13.57	101.953	3.23416
	19	46	82	69.4391	13.5699	101.934	3.23333
	19	46	91	69.4391	13.5702	101.903	3.23254
	19	46	100	69.4391	13.5701	101.966	3.23442
	19	55	19	69.4391	13.5698	101.986	3.23498
	19	55	28	69.4391	13.5699	101.985	3.23498
	19	55	37	69.4391	13.5699	101.991	3.2351
	19	55	46	69.4391	13.5698	101.989	3.23517
	19	55	55	69.4391	13.5698	102.011	3.2357
	19	55	64	69.4391	13.5698	102.009	3.2357
	19	55	73	69.4391	13.57	101.936	3.23356
	19	55	82	69.4391	13.5698	102.017	3.23584
	19	55	91	69.4391	13.5723	101.735	3.22783
	19	55	100	69.4391	13.5701	101.929	3.23344
	19	64	19	69.4391	13.5698	102.018	3.23594
	19	64	28	69.4391	13.5695	102.074	3.23746
	19	64	37	69.4391	13.5698	102.01	3.2357
	19	64	46	69.4391	13.5698	102.012	3.23571
	19	64	55	69.4391	13.5698	102.011	3.23574
	19	64	64	69.4391	13.5697	101.994	3.2352
	19	64	73	69.4391	13.5699	101.965	3.23447
	19	64	82	69.4391	13.5698	101.985	3.23509
	19	64	91	69.4391	13.5697	102.01	3.23562
	19	64	100	69.4391	13.57	101.975	3.23454
	19	73	19	69.4391	13.5698	101.992	3.23516
	19	73	28	69.4391	13.5698	102.011	3.23575
	19	73	37	69.4391	13.5698	101.992	3.23506
	19	73	46	69.4391	13.5698	102.013	3.23579
	19	73	55	69.4391	13.5698	101.977	3.2346
	19	73	64	69.4391	13.5698	101.988	3.23514
	19	73	73	69.4391	13.57	101.932	3.23341
	19	73	82	69.4391	13.5699	101.986	3.23508
	19	73	91	69.4391	13.5698	101.942	3.23366
	19	73	100	69.4391	13.5697	102.009	3.23554
	19	82	19	69.4391	13.5698	101.988	3.23503
	19	82	28	69.4391	13.5698	101.998	3.23528
	19	82	37	69.4391	13.5699	101.974	3.23464
	19	82	46	69.4391	13.5699	101.957	3.23412
	19	82	55	69.4391	13.5697	102.007	3.23564
	19	82	64	69.4391	13.57	101.963	3.23445
	19	82	73	69.4391	13.5697	102.005	3.23554
	19	82	82	69.4391	13.5698	101.955	3.23398
	19	82	91	69.4391	13.5699	102.001	3.23533
	19	82	100	69.4391	13.57	101.988	3.23506
	19	91	19	69.4391	13.5698	102	3.23536
	19	91	28	69.4391	13.5698	102.001	3.23548
	19	91	37	69.4391	13.5698	102.012	3.23578
	19	91	46	69.4391	13.5698	102.011	3.23575
	19	91	55	69.4391	13.5698	102.013	3.23573
	19	91	64	69.4391	13.5701	101.957	3.23415
	19	91	73	69.4391	13.5697	101.993	3.23514
	19	91	82	69.4391	13.5701	101.967	3.23447
	19	91	91	69.4391	13.5701	101.907	3.23261
	19	91	100	69.4391	13.5697	101.965	3.23431
	19	100	19	69.4391	13.5699	101.986	3.23497
	19	100	28	69.4391	13.5697	102.014	3.23579
	19	100	37	69.4391	13.5697	101.998	3.23534
	19	100	46	69.4391	13.5698	102.002	3.23544
	19	100	55	69.4391	13.5697	101.982	3.23483
	19	100	64	69.4391	13.57	101.946	3.23381
	19	100	73	69.4391	13.57	101.944	3.23366
	19	100	82	69.4391	13.5699	101.93	3.23335
	19	100	91	69.4391	13.5699	101.929	3.23325
	19	100	100	69.4391	13.5701	101.916	3.23293
	28	19	19	69.4391	13.5698	102.01	3.23569
	28	19	28	69.4391	13.5698	101.999	3.23537
	28	19	37	69.4391	13.5699	101.969	3.23447
	28	19	46	69.4391	13.5698	101.969	3.23448
	28	19	55	69.4391	13.57	101.948	3.23384
	28	19	64	69.4391	13.5698	102.006	3.23566
	28	19	73	69.4391	13.5697	101.981	3.23489
	28	19	82	69.4391	13.5701	101.916	3.23288
	28	19	91	69.4391	13.5702	101.924	3.2331
	28	19	100	69.4391	13.5698	101.98	3.23485
	28	28	19	69.4391	13.5697	102.006	3.23557
	28	28	28	69.4391	13.5699	101.977	3.23471
	28	28	37	69.4391	13.5699	101.986	3.23507
	28	28	46	69.4391	13.5698	101.972	3.2345
	28	28	55	69.4391	13.57	101.947	3.23385
	28	28	64	69.4391	13.5701	101.952	3.23401
	28	28	73	69.4391	13.5697	102.004	3.2354
	28	28	82	69.4391	13.5701	101.922	3.23313
	28	28	91	69.4391	13.5701	101.918	3.23312
	28	28	100	69.4391	13.5698	101.963	3.23407
	28	37	19	69.4391	13.5698	101.989	3.23505
	28	37	28	69.4391	13.5698	101.984	3.23492
	28	37	37	69.4391	13.5697	101.995	3.23521
	28	37	46	69.4391	13.5698	101.983	3.23497
	28	37	55	69.4391	13.5698	101.962	3.23428
	28	37	64	69.4391	13.57	101.937	3.23352
	28	37	73	69.4391	13.5699	101.943	3.23358
	28	37	82	69.4391	13.5701	101.917	3.23292
	28	37	91	69.4391	13.5698	101.938	3.2336
	28	37	100	69.4391	13.57	101.914	3.23276
	28	46	19	69.4391	13.5698	101.988	3.23505
	28	46	28	69.4391	13.5699	101.978	3.23475
	28	46	37	69.4391	13.5699	101.97	3.2345
	28	46	46	69.4391	13.5699	101.959	3.23414
	28	46	55	69.4391	13.5704	101.928	3.23339
	28	46	64	69.4391	13.5699	101.954	3.23391
	28	46	73	69.4391	13.5701	101.922	3.23314
	28	46	82	69.4391	13.5701	101.975	3.23467
	28	46	91	69.4391	13.5699	101.926	3.23308
	28	46	100	69.4391	13.5701	101.895	3.23227
	28	55	19	69.4391	13.5698	102.011	3.23576
	28	55	28	69.4391	13.5698	101.995	3.23518
	28	55	37	69.4391	13.5699	101.967	3.23441
	28	55	46	69.4391	13.5699	101.944	3.23379
	28	55	55	69.4391	13.5698	101.976	3.2346
	28	55	64	69.4391	13.5697	101.944	3.23385
	28	55	73	69.4391	13.5701	101.951	3.234
	28	55	82	69.4391	13.57	101.917	3.23288
	28	55	91	69.4391	13.5701	101.905	3.23263
	28	55	100	69.4391	13.5702	101.89	3.23218
	28	64	19	69.4391	13.5699	101.994	3.23527
	28	64	28	69.4391	13.5699	101.978	3.23472
	28	64	37	69.4391	13.5698	101.969	3.23452
	28	64	46	69.4391	13.5699	101.98	3.23473
	28	64	55	69.4391	13.5699	101.972	3.23463
	28	64	64	69.4391	13.57	101.936	3.23352
	28	64	73	69.4391	13.5698	102.003	3.23539
	28	64	82	69.4391	13.5698	101.976	3.23457
	28	64	91	69.4391	13.5701	101.924	3.23315
	28	64	100	69.4391	13.57	101.988	3.23495
	28	73	19	69.4391	13.5698	102.014	3.23579
	28	73	28	69.4391	13.5698	102.013	3.23572
	28	73	37	69.4391	13.5698	102.002	3.23548
	28	73	46	69.4391	13.5696	102.045	3.23674
	28	73	55	69.4391	13.5699	101.956	3.23409
	28	73	64	69.4391	13.5699	101.96	3.2343
	28	73	73	69.4391	13.5699	101.977	3.23487
	28	73	82	69.4391	13.57	101.924	3.23315
	28	73	91	69.4391	13.57	101.937	3.2337
	28	73	100	69.4391	13.5699	101.973	3.23446
	28	82	19	69.4391	13.5698	101.994	3.23521
	28	82	28	69.4391	13.5698	102.011	3.23572
	28	82	37	69.4391	13.5699	101.974	3.23463
	28	82	46	69.4391	13.5698	101.98	3.23486
	28	82	55	69.4391	13.5699	101.982	3.23481
	28	82	64	69.4391	13.5698	101.999	3.23546
	28	82	73	69.4391	13.5697	102.01	3.2357
	28	82	82	69.4391	13.5698	101.976	3.23456
	28	82	91	69.4391	13.5701	101.911	3.23287
	28	82	100	69.4391	13.5702	101.937	3.23356
	28	91	19	69.4391	13.5698	101.99	3.23512
	28	91	28	69.4391	13.5698	102.006	3.23555
	28	91	37	69.4391	13.5697	102	3.23535
	28	91	46	69.4391	13.5698	102.008	3.23568
	28	91	55	69.4391	13.5699	102.005	3.23546
	28	91	64	69.4391	13.5699	101.98	3.23494
	28	91	73	69.4391	13.5698	102.005	3.23562
	28	91	82	69.4391	13.5698	101.969	3.23447
	28	91	91	69.4391	13.5697	101.963	3.2342
	28	91	100	69.4391	13.57	101.985	3.23485
	28	100	19	69.4391	13.5698	101.998	3.23529
	28	100	28	69.4391	13.5698	102.006	3.23558
	28	100	37	69.4391	13.5698	101.975	3.23466
	28	100	46	69.4391	13.5698	101.983	3.23478
	28	100	55	69.4391	13.5699	101.988	3.23516
	28	100	64	69.4391	13.5697	102.009	3.23558
	28	100	73	69.4391	13.5699	101.938	3.23358
	28	100	82	69.4391	13.5698	101.959	3.23409
	28	100	91	69.4391	13.5697	102.008	3.23568
	28	100	100	69.4391	13.5698	101.983	3.23503
	37	19	19	69.4391	13.5698	101.991	3.2351
	37	19	28	69.4391	13.5698	101.995	3.2352
	37	19	37	69.4391	13.5697	102.008	3.23557
	37	19	46	69.4391	13.5699	101.963	3.23435
	37	19	55	69.4391	13.5698	101.961	3.23426
	37	19	64	69.4391	13.5698	101.959	3.23416
	37	19	73	69.4391	13.57	101.933	3.23345
	37	19	82	69.4391	13.5697	101.982	3.23481
	37	19	91	69.4391	13.5697	102.014	3.23581
	37	19	100	69.4391	13.57	101.928	3.23332
	37	28	19	69.4391	13.5698	101.992	3.23513
	37	28	28	69.4391	13.5699	101.995	3.23525
	37	28	37	69.4391	13.5698	101.975	3.23467
	37	28	46	69.4391	13.5698	102.014	3.23578
	37	28	55	69.4391	13.57	101.946	3.23383
	37	28	64	69.4391	13.5698	101.955	3.23409
	37	28	73	69.4391	13.5698	101.954	3.23405
	37	28	82	69.4391	13.5697	101.996	3.23515
	37	28	91	69.4391	13.57	101.922	3.23296
	37	28	100	69.4391	13.5699	101.977	3.23452
	37	37	19	69.4391	13.5698	101.997	3.23536
	37	37	28	69.4391	13.5699	101.987	3.23506
	37	37	37	69.4391	13.5699	101.976	3.23473
	37	37	46	69.4391	13.5698	101.986	3.235
	37	37	55	69.4391	13.5699	101.978	3.23484
	37	37	64	69.4391	13.5698	101.963	3.23431
	37	37	73	69.4391	13.5699	101.942	3.23375
	37	37	82	69.4391	13.5698	101.958	3.23403
	37	37	91	69.4391	13.5701	101.96	3.23418
	37	37	100	69.4391	13.5697	101.966	3.23428
	37	46	19	69.4391	13.5698	101.997	3.23529
	37	46	28	69.4391	13.5698	101.987	3.23504
	37	46	37	69.4391	13.5699	101.97	3.23453
	37	46	46	69.4391	13.5699	101.961	3.23423
	37	46	55	69.4391	13.57	101.943	3.23374
	37	46	64	69.4391	13.5699	101.959	3.2343
	37	46	73	69.4391	13.57	101.926	3.2332
	37	46	82	69.4391	13.5699	101.929	3.23326
	37	46	91	69.4391	13.5698	102.015	3.23583
	37	46	100	69.4391	13.5701	101.895	3.23227
	37	55	19	69.4391	13.5686	102.148	3.23993
	37	55	28	69.4391	13.5698	101.988	3.23514
	37	55	37	69.4391	13.5699	101.962	3.23421
	37	55	46	69.4391	13.5697	102.032	3.23634
	37	55	55	69.4391	13.5697	101.993	3.23507
	37	55	64	69.4391	13.5702	101.916	3.23317
	37	55	73	69.4391	13.5699	101.945	3.23368
	37	55	82	69.4391	13.5704	101.896	3.23225
	37	55	91	69.4391	13.57	101.9	3.23248
	37	55	100	69.4391	13.5699	101.917	3.23291
	37	64	19	69.4391	13.5701	101.924	3.23317
	37	64	28	69.4391	13.5699	101.992	3.23517
	37	64	37	69.4391	13.5692	102.156	3.24005
	37	64	46	69.4391	13.57	101.939	3.2336
	37	64	55	69.4391	13.5698	101.981	3.23473
	37	64	64	69.4391	13.57	101.949	3.23387
	37	64	73	69.4391	13.57	101.939	3.23353
	37	64	82	69.4391	13.57	101.949	3.23383
	37	64	91	69.4391	13.5702	101.883	3.23185
	37	64	100	69.4391	13.5698	101.814	3.22949
	37	73	19	69.4391	13.5697	102.015	3.23584
	37	73	28	69.4391	13.5697	102.014	3.2358
	37	73	37	69.4391	13.5698	101.997	3.23533
	37	73	46	69.4391	13.57	101.967	3.23448
	37	73	55	69.4391	13.5698	102.004	3.2355
	37	73	64	69.4391	13.5698	101.965	3.23426
	37	73	73	69.4391	13.5698	102.016	3.23586
	37	73	82	69.4391	13.5697	102.011	3.23568
	37	73	91	69.4391	13.5697	102.005	3.23554
	37	73	100	69.4391	13.5697	102.012	3.23572
	37	82	19	69.4391	13.5698	102.003	3.23544
	37	82	28	69.4391	13.5698	102.007	3.23564
	37	82	37	69.4391	13.57	101.977	3.23472
	37	82	46	69.4391	13.5697	102.015	3.23581
	37	82	55	69.4391	13.5698	102.001	3.23538
	37	82	64	69.4391	13.5697	102.005	3.23543
	37	82	73	69.4391	13.5702	101.94	3.23358
	37	82	82	69.4391	13.5697	102.002	3.23534
	37	82	91	69.4391	13.5697	102.008	3.23567
	37	82	100	69.4391	13.5697	101.996	3.23529
	37	91	19	69.4391	13.5698	101.992	3.23514
	37	91	28	69.4391	13.5698	101.988	3.23497
	37	91	37	69.4391	13.5698	102.003	3.23554
	37	91	46	69.4391	13.57	101.97	3.23459
	37	91	55	69.4391	13.5698	101.962	3.2342
	37	91	64	69.4391	13.5698	101.993	3.23507
	37	91	73	69.4391	13.5697	101.991	3.23503
	37	91	82	69.4391	13.5698	102.013	3.23572
	37	91	91	69.4391	13.5698	101.995	3.23507
	37	91	100	69.4391	13.5701	101.911	3.2329
	37	100	19	69.4391	13.5698	101.993	3.23515
	37	100	28	69.4391	13.5698	101.991	3.23506
	37	100	37	69.4391	13.5699	101.972	3.23457
	37	100	46	69.4391	13.5698	101.979	3.23468
	37	100	55	69.4391	13.5698	101.974	3.23468
	37	100	64	69.4391	13.5699	101.966	3.23426
	37	100	73	69.4391	13.5699	101.992	3.23507
	37	100	82	69.4391	13.57	101.926	3.23333
	37	100	91	69.4391	13.5698	101.991	3.23523
	37	100	100	69.4391	13.5697	101.993	3.23502
	46	19	19	69.4391	13.5698	102.002	3.23546
	46	19	28	69.4391	13.5699	101.981	3.23483
	46	19	37	69.4391	13.5698	101.974	3.23462
	46	19	46	69.4391	13.5699	101.995	3.2353
	46	19	55	69.4391	13.57	101.954	3.234
	46	19	64	69.4391	13.5698	101.968	3.23453
	46	19	73	69.4391	13.5697	102.003	3.23553
	46	19	82	69.4391	13.57	101.988	3.23494
	46	19	91	69.4391	13.5701	101.914	3.23295
	46	19	100	69.4391	13.5697	101.99	3.23518
	46	28	19	69.4391	13.5698	102.008	3.23568
	46	28	28	69.4391	13.5699	101.967	3.23434
	46	28	37	69.4391	13.5699	101.976	3.23473
	46	28	46	69.4391	13.57	101.974	3.23467
	46	28	55	69.4391	13.5698	101.973	3.23468
	46	28	64	69.4391	13.57	101.977	3.23481
	46	28	73	69.4391	13.57	101.98	3.23482
	46	28	82	69.4391	13.57	101.924	3.23319
	46	28	91	69.4391	13.5702	101.929	3.23335
	46	28	100	69.4391	13.5701	101.9	3.23238
	46	37	19	69.4391	13.5683	102.403	3.24709
	46	37	28	69.4391	13.5698	101.996	3.2353
	46	37	37	69.4391	13.5698	101.986	3.23499
	46	37	46	69.4391	13.57	101.969	3.23451
	46	37	55	69.4391	13.5697	101.997	3.23524
	46	37	64	69.4391	13.5699	101.947	3.23385
	46	37	73	69.4391	13.5699	101.969	3.23435
	46	37	82	69.4391	13.57	101.925	3.23324
	46	37	91	69.4391	13.5701	101.936	3.23367
	46	37	100	69.4391	13.5698	101.96	3.23427
	46	46	19	69.4391	13.5698	101.991	3.2351
	46	46	28	69.4391	13.5699	101.989	3.23512
	46	46	37	69.4391	13.5699	101.991	3.2351
	46	46	46	69.4391	13.5699	101.972	3.23462
	46	46	55	69.4391	13.5698	102.02	3.23594
	46	46	64	69.4391	13.5698	102.003	3.23556
	46	46	73	69.4391	13.57	101.924	3.23312
	46	46	82	69.4391	13.5697	102.007	3.23564
	46	46	91	69.4391	13.5701	101.901	3.23249
	46	46	100	69.4391	13.57	101.913	3.23276
	46	55	19	69.4391	13.5698	101.998	3.23537
	46	55	28	69.4391	13.57	101.984	3.23477
	46	55	37	69.4391	13.5699	101.958	3.23411
	46	55	46	69.4391	13.5702	101.991	3.23517
	46	55	55	69.4391	13.5697	101.947	3.23387
	46	55	64	69.4391	13.5698	101.963	3.2343
	46	55	73	69.4391	13.57	101.957	3.23417
	46	55	82	69.4391	13.5701	101.938	3.23371
	46	55	91	69.4391	13.5699	101.883	3.23189
	46	55	100	69.4391	13.5702	101.903	3.23255
	46	64	19	69.4391	13.5693	102.158	3.23998
	46	64	28	69.4391	13.5698	102.008	3.23562
	46	64	37	69.4391	13.5699	101.985	3.235
	46	64	46	69.4391	13.5697	102.009	3.23561
	46	64	55	69.4391	13.5687	102.178	3.24233
	46	64	64	69.4391	13.5692	101.933	3.23268
	46	64	73	69.4391	13.5701	101.95	3.23399
	46	64	82	69.4391	13.5698	102.005	3.23559
	46	64	91	69.4391	13.5697	102.01	3.23559
	46	64	100	69.4391	13.57	101.954	3.23405
	46	73	19	69.4391	13.5698	102.011	3.23571
	46	73	28	69.4391	13.5698	101.991	3.23518
	46	73	37	69.4391	13.5698	102.014	3.23582
	46	73	46	69.4391	13.5698	101.998	3.23534
	46	73	55	69.4391	13.5698	102.011	3.23574
	46	73	64	69.4391	13.5698	102.008	3.23558
	46	73	73	69.4391	13.57	101.938	3.23355
	46	73	82	69.4391	13.5697	102.014	3.23579
	46	73	91	69.4391	13.57	101.91	3.23275
	46	73	100	69.4391	13.5698	101.971	3.23441
	46	82	19	69.4391	13.5698	102.007	3.23561
	46	82	28	69.4391	13.5698	102.012	3.23577
	46	82	37	69.4391	13.5698	101.992	3.23509
	46	82	46	69.4391	13.5699	101.958	3.23413
	46	82	55	69.4391	13.57	101.948	3.23385
	46	82	64	69.4391	13.5698	101.992	3.23509
	46	82	73	69.4391	13.5698	101.954	3.23409
	46	82	82	69.4391	13.5701	101.934	3.23358
	46	82	91	69.4391	13.5697	102.005	3.23551
	46	82	100	69.4391	13.5697	102	3.2354
	46	91	19	69.4391	13.5698	101.997	3.23527
	46	91	28	69.4391	13.5698	102.005	3.23557
	46	91	37	69.4391	13.5697	102.006	3.23549
	46	91	46	69.4391	13.5698	101.987	3.23491
	46	91	55	69.4391	13.5698	101.997	3.23537
	46	91	64	69.4391	13.5699	102.008	3.23567
	46	91	73	69.4391	13.5698	101.969	3.23439
	46	91	82	69.4391	13.5697	101.968	3.23441
	46	91	91	69.4391	13.57	101.944	3.23391
	46	91	100	69.4391	13.5701	101.92	3.23317
	46	100	19	69.4391	13.5698	101.997	3.2353
	46	100	28	69.4391	13.5699	102.004	3.23552
	46	100	37	69.4391	13.5698	101.998	3.23524
	46	100	46	69.4391	13.5698	101.982	3.23481
	46	100	55	69.4391	13.5699	101.965	3.23445
	46	100	64	69.4391	13.5699	101.944	3.23376
	46	100	73	69.4391	13.5699	101.946	3.23371
	46	100	82	69.4391	13.57	101.997	3.23527
	46	100	91	69.4391	13.5701	101.954	3.23405
	46	100	100	69.4391	13.5701	101.901	3.23247
	55	19	19	69.4391	13.5697	102.011	3.23568
	55	19	28	69.4391	13.5698	101.991	3.23511
	55	19	37	69.4391	13.5699	101.98	3.23486
	55	19	46	69.4391	13.5699	101.962	3.23427
	55	19	55	69.4391	13.5698	102.013	3.23573
	55	19	64	69.4391	13.5698	101.971	3.23459
	55	19	73	69.4391	13.5699	101.974	3.23448
	55	19	82	69.4391	13.5702	101.928	3.23334
	55	19	91	69.4391	13.5697	102.01	3.2356
	55	19	100	69.4391	13.5698	101.982	3.23495
	55	28	19	69.4391	13.5698	102.003	3.23544
	55	28	28	69.4391	13.5699	101.981	3.23483
	55	28	37	69.4391	13.5698	102	3.23544
	55	28	46	69.4391	13.5699	101.966	3.23439
	55	28	55	69.4391	13.5697	101.983	3.23479
	55	28	64	69.4391	13.5699	101.952	3.23389
	55	28	73	69.4391	13.5697	102.003	3.23535
	55	28	82	69.4391	13.5701	101.924	3.23312
	55	28	91	69.4391	13.5702	101.908	3.23277
	55	28	100	69.4391	13.5701	101.898	3.23236
	55	37	19	69.4391	13.5698	102.007	3.23561
	55	37	28	69.4391	13.5698	101.984	3.23491
	55	37	37	69.4391	13.5698	101.984	3.2349
	55	37	46	69.4391	13.5699	101.961	3.23423
	55	37	55	69.4391	13.5697	102.018	3.23585
	55	37	64	69.4391	13.5698	102.008	3.23568
	55	37	73	69.4391	13.5699	101.947	3.23381
	55	37	82	69.4391	13.57	101.933	3.23345
	55	37	91	69.4391	13.5701	101.92	3.23317
	55	37	100	69.4391	13.5698	101.961	3.23435
	55	46	19	69.4391	13.5699	101.995	3.23527
	55	46	28	69.4391	13.5698	101.994	3.23526
	55	46	37	69.4391	13.5699	101.982	3.23483
	55	46	46	69.4391	13.5697	101.999	3.23538
	55	46	55	69.4391	13.5699	101.95	3.23389
	55	46	64	69.4391	13.5701	101.959	3.23418
	55	46	73	69.4391	13.5711	101.622	3.22405
	55	46	82	69.4391	13.5699	101.938	3.23347
	55	46	91	69.4391	13.5698	101.887	3.23209
	55	46	100	69.4391	13.57	101.962	3.23449
	55	55	19	69.4391	13.5698	101.994	3.23525
	55	55	28	69.4391	13.5698	102.011	3.23574
	55	55	37	69.4391	13.5696	102.009	3.23585
	55	55	46	69.4391	13.5676	102.616	3.25302
	55	55	55	69.4391	13.5699	101.954	3.23401
	55	55	64	69.4391	13.57	101.954	3.23419
	55	55	73	69.4391	13.5697	101.983	3.2349
	55	55	82	69.4391	13.5698	101.957	3.234
	55	55	91	69.4391	13.5701	101.918	3.23294
	55	55	100	69.4391	13.5699	101.936	3.23333
	55	64	19	69.4391	13.5698	101.993	3.23519
	55	64	28	69.4391	13.5697	102.019	3.23578
	55	64	37	69.4391	13.5698	101.993	3.23517
	55	64	46	69.4391	13.57	101.983	3.23492
	55	64	55	69.4391	13.5694	102.091	3.2381
	55	64	64	69.4391	13.5698	101.995	3.23533
	55	64	73	69.4391	13.568	101.919	3.23206
	55	64	82	69.4391	13.5664	102.12	3.23795
	55	64	91	69.4391	13.5697	101.965	3.2344
	55	64	100	69.4391	13.571	101.854	3.23074
	55	73	19	69.4391	13.5697	102.04	3.23638
	55	73	28	69.4391	13.5698	102.006	3.23549
	55	73	37	69.4391	13.5698	101.996	3.23529
	55	73	46	69.4391	13.5698	101.999	3.23535
	55	73	55	69.4391	13.5698	101.968	3.23438
	55	73	64	69.4391	13.5697	102.006	3.23551
	55	73	73	69.4391	13.5698	102.014	3.23581
	55	73	82	69.4391	13.5697	102.009	3.23559
	55	73	91	69.4391	13.57	101.936	3.23356
	55	73	100	69.4391	13.57	101.946	3.23392
	55	82	19	69.4391	13.5697	102.012	3.2357
	55	82	28	69.4391	13.5698	102.01	3.23565
	55	82	37	69.4391	13.5698	102.006	3.23558
	55	82	46	69.4391	13.5697	102.007	3.23552
	55	82	55	69.4391	13.5699	101.994	3.23526
	55	82	64	69.4391	13.5698	101.994	3.23532
	55	82	73	69.4391	13.5698	102.011	3.23572
	55	82	82	69.4391	13.5699	101.94	3.23374
	55	82	91	69.4391	13.5697	102	3.23528
	55	82	100	69.4391	13.57	101.929	3.23345
	55	91	19	69.4391	13.5697	102.011	3.23573
	55	91	28	69.4391	13.5698	102.003	3.23544
	55	91	37	69.4391	13.5699	101.998	3.23527
	55	91	46	69.4391	13.5699	101.993	3.23527
	55	91	55	69.4391	13.5697	102.005	3.23545
	55	91	64	69.4391	13.5698	102.009	3.23559
	55	91	73	69.4391	13.5699	101.944	3.23369
	55	91	82	69.4391	13.5698	102.006	3.23565
	55	91	91	69.4391	13.5697	101.974	3.23455
	55	91	100	69.4391	13.57	101.958	3.23434
	55	100	19	69.4391	13.5698	101.994	3.23518
	55	100	28	69.4391	13.5698	102.009	3.23567
	55	100	37	69.4391	13.5697	102.011	3.23567
	55	100	46	69.4391	13.5698	101.97	3.23453
	55	100	55	69.4391	13.5699	101.971	3.23444
	55	100	64	69.4391	13.5697	101.987	3.2349
	55	100	73	69.4391	13.57	101.952	3.23388
	55	100	82	69.4391	13.5701	101.932	3.23345
	55	100	91	69.4391	13.5699	101.94	3.23346
	55	100	100	69.4391	13.5699	101.987	3.23515
	64	19	19	69.4391	13.5698	102.014	3.23583
	64	19	28	69.4391	13.5697	102.009	3.23562
	64	19	37	69.4391	13.5698	102.01	3.23573
	64	19	46	69.4391	13.5698	101.989	3.23514
	64	19	55	69.4391	13.5698	101.967	3.23436
	64	19	64	69.4391	13.57	101.973	3.23467
	64	19	73	69.4391	13.5698	101.948	3.23383
	64	19	82	69.4391	13.5698	101.95	3.23384
	64	19	91	69.4391	13.5698	101.978	3.23455
	64	19	100	69.4391	13.5702	101.956	3.23411
	64	28	19	69.4391	13.5698	102.005	3.23555
	64	28	28	69.4391	13.5697	101.999	3.23535
	64	28	37	69.4391	13.5699	101.967	3.23445
	64	28	46	69.4391	13.5699	101.994	3.23524
	64	28	55	69.4391	13.5698	101.986	3.23486
	64	28	64	69.4391	13.5698	102.015	3.23581
	64	28	73	69.4391	13.5698	101.98	3.23465
	64	28	82	69.4391	13.5699	101.987	3.23514
	64	28	91	69.4391	13.5698	101.938	3.23358
	64	28	100	69.4391	13.5699	101.953	3.23417
	64	37	19	69.4391	13.5698	102.007	3.23563
	64	37	28	69.4391	13.5698	102.008	3.23556
	64	37	37	69.4391	13.5699	101.987	3.23508
	64	37	46	69.4391	13.57	101.967	3.23442
	64	37	55	69.4391	13.5698	101.967	3.23441
	64	37	64	69.4391	13.5698	102.005	3.23562
	64	37	73	69.4391	13.57	101.948	3.23398
	64	37	82	69.4391	13.5701	101.957	3.2342
	64	37	91	69.4391	13.57	101.93	3.23331
	64	37	100	69.4391	13.57	101.937	3.23365
	64	46	19	69.4391	13.5698	101.995	3.23526
	64	46	28	69.4391	13.5698	102.009	3.23561
	64	46	37	69.4391	13.5698	101.976	3.23465
	64	46	46	69.4391	13.5698	102.004	3.23557
	64	46	55	69.4391	13.57	101.962	3.23435
	64	46	64	69.4391	13.5697	102.009	3.23569
	64	46	73	69.4391	13.5697	102	3.23547
	64	46	82	69.4391	13.57	101.984	3.23495
	64	46	91	69.4391	13.5697	102.014	3.23575
	64	46	100	69.4391	13.5702	101.914	3.23296
	64	55	19	69.4391	13.5698	101.998	3.23537
	64	55	28	69.4391	13.5699	101.983	3.23486
	64	55	37	69.4391	13.5715	101.5	3.22084
	64	55	46	69.4391	13.5697	102.001	3.23533
	64	55	55	69.4391	13.5697	102.025	3.23502
	64	55	64	69.4391	13.5707	101.791	3.22883
	64	55	73	69.4391	13.5713	101.722	3.22727
	64	55	82	69.4392	13.5614	103.61	3.27723
	64	55	91	69.4391	13.5711	101.79	3.22905
	64	55	100	69.4391	13.5698	101.949	3.23383
	64	64	19	69.4391	13.5698	102.009	3.23564
	64	64	28	69.4391	13.569	102.215	3.24164
	64	64	37	69.4391	13.5695	102.144	3.23975
	64	64	46	69.4391	13.5684	102.306	3.24492
	64	64	55	69.4391	13.5698	102.004	3.23557
	64	64	64	69.4391	13.5697	102.053	3.23707
	64	64	73	69.4391	13.5692	101.878	3.23189
	64	64	82	69.4391	13.5687	101.92	3.23276
	64	64	91	69.4391	13.5703	101.884	3.23189
	64	64	100	69.4391	13.5699	101.959	3.23438
	64	73	19	69.4391	13.5697	102.013	3.23575
	64	73	28	69.4391	13.5698	101.998	3.2354
	64	73	37	69.4391	13.5698	102.014	3.23583
	64	73	46	69.4391	13.5697	102.011	3.23573
	64	73	55	69.4391	13.5697	102.003	3.2355
	64	73	64	69.4391	13.5698	101.982	3.23477
	64	73	73	69.4391	13.57	101.933	3.23336
	64	73	82	69.4391	13.57	101.963	3.2344
	64	73	91	69.4391	13.5684	102.135	3.24051
	64	73	100	69.4391	13.5698	101.963	3.23409
	64	82	19	69.4391	13.5697	102.015	3.23584
	64	82	28	69.4391	13.5697	102.015	3.23582
	64	82	37	69.4391	13.5697	102.014	3.23579
	64	82	46	69.4391	13.5698	101.994	3.23514
	64	82	55	69.4391	13.5698	101.996	3.23518
	64	82	64	69.4391	13.5697	101.991	3.23499
	64	82	73	69.4391	13.5697	101.977	3.23464
	64	82	82	69.4391	13.5698	102.014	3.23575
	64	82	91	69.4391	13.5698	102.001	3.23532
	64	82	100	69.4391	13.5697	102.007	3.23554
	64	91	19	69.4391	13.5698	102.004	3.23547
	64	91	28	69.4391	13.5698	102.008	3.23564
	64	91	37	69.4391	13.5697	102.003	3.23541
	64	91	46	69.4391	13.5698	102	3.2353
	64	91	55	69.4391	13.5698	101.993	3.23528
	64	91	64	69.4391	13.5697	102.002	3.23535
	64	91	73	69.4391	13.57	101.986	3.23507
	64	91	82	69.4391	13.5698	101.961	3.2341
	64	91	91	69.4391	13.5697	102.005	3.2356
	64	91	100	69.4391	13.5697	102.007	3.23548
	64	100	19	69.4391	13.5697	102.01	3.23563
	64	100	28	69.4391	13.5698	101.997	3.23526
	64	100	37	69.4391	13.5698	101.979	3.23475
	64	100	46	69.4391	13.5699	101.991	3.23515
	64	100	55	69.4391	13.57	101.956	3.23415
	64	100	64	69.4391	13.57	101.942	3.2337
	64	100	73	69.4391	13.57	101.977	3.23479
	64	100	82	69.4391	13.5699	101.938	3.2335
	64	100	91	69.4391	13.5697	102.001	3.23527
	64	100	100	69.4391	13.5699	101.915	3.23284
	73	19	19	69.4391	13.5698	102.014	3.23583
	73	19	28	69.4391	13.5698	101.99	3.23506
	73	19	37	69.4391	13.5698	101.98	3.23475
	73	19	46	69.4391	13.5698	101.98	3.23475
	73	19	55	69.4391	13.57	101.977	3.23467
	73	19	64	69.4391	13.5699	101.959	3.2341
	73	19	73	69.4391	13.57	101.945	3.23377
	73	19	82	69.4391	13.5698	102.01	3.23559
	73	19	91	69.4391	13.5699	101.97	3.23462
	73	19	100	69.4391	13.5697	101.982	3.23487
	73	28	19	69.4391	13.5698	102.01	3.23572
	73	28	28	69.4391	13.5698	101.984	3.23491
	73	28	37	69.4391	13.5698	102.014	3.23578
	73	28	46	69.4391	13.5699	101.966	3.23437
	73	28	55	69.4391	13.5699	101.974	3.2345
	73	28	64	69.4391	13.57	101.946	3.23382
	73	28	73	69.4391	13.5697	102.008	3.23553
	73	28	82	69.4391	13.5698	101.974	3.23472
	73	28	91	69.4391	13.5698	101.961	3.23421
	73	28	100	69.4391	13.5698	101.956	3.23404
	73	37	19	69.4391	13.5698	102.001	3.23544
	73	37	28	69.4391	13.5698	101.984	3.2349
	73	37	37	69.4391	13.5698	102.011	3.2357
	73	37	46	69.4391	13.5697	102.007	3.23562
	73	37	55	69.4391	13.5699	101.96	3.23416
	73	37	64	69.4391	13.5699	101.996	3.23527
	73	37	73	69.4391	13.5699	101.994	3.23515
	73	37	82	69.4391	13.5697	101.999	3.23527
	73	37	91	69.4391	13.5699	101.974	3.2348
	73	37	100	69.4391	13.57	101.985	3.2349
	73	46	19	69.4391	13.5698	102	3.23544
	73	46	28	69.4391	13.5698	102.003	3.23551
	73	46	37	69.4391	13.5706	101.922	3.23322
	73	46	46	69.4391	13.5699	101.97	3.23448
	73	46	55	69.4391	13.57	101.966	3.23436
	73	46	64	69.4391	13.5698	102.013	3.23578
	73	46	73	69.4391	13.57	101.957	3.23426
	73	46	82	69.4391	13.5697	102.007	3.23547
	73	46	91	69.4391	13.5702	101.946	3.23382
	73	46	100	69.4391	13.5699	101.966	3.23457
	73	55	19	69.4391	13.57	101.952	3.23376
	73	55	28	69.4391	13.57	101.968	3.23447
	73	55	37	69.4391	13.5696	102.069	3.23742
	73	55	46	69.4391	13.5698	101.932	3.2334
	73	55	55	69.4391	13.57	101.966	3.23444
	73	55	64	69.4391	13.5698	102.013	3.23574
	73	55	73	69.4391	13.5699	101.95	3.23402
	73	55	82	69.4391	13.5697	101.987	3.23489
	73	55	91	69.4391	13.5701	101.977	3.23468
	73	55	100	69.4391	13.5701	101.902	3.23246
	73	64	19	69.4391	13.5676	102.592	3.2521
	73	64	28	69.4391	13.5698	101.981	3.23532
	73	64	37	69.4391	13.5697	102.012	3.23569
	73	64	46	69.4391	13.5698	101.993	3.23521
	73	64	55	69.4391	13.57	101.929	3.23311
	73	64	64	69.4391	13.5698	102.001	3.23531
	73	64	73	69.4391	13.5699	101.945	3.23376
	73	64	82	69.4391	13.5701	101.963	3.23436
	73	64	91	69.4391	13.57	101.946	3.23372
	73	64	100	69.4391	13.5702	101.901	3.23246
	73	73	19	69.4391	13.5698	101.998	3.23535
	73	73	28	69.4391	13.5697	102.014	3.23577
	73	73	37	69.4391	13.5697	102.014	3.23582
	73	73	46	69.4391	13.5697	102.005	3.23558
	73	73	55	69.4391	13.5699	101.956	3.23412
	73	73	64	69.4391	13.57	101.945	3.23375
	73	73	73	69.4391	13.5699	101.959	3.23403
	73	73	82	69.4391	13.5701	101.924	3.23315
	73	73	91	69.4391	13.5697	102.004	3.23542
	73	73	100	69.4391	13.5697	102.004	3.23539
	73	82	19	69.4391	13.5697	102.009	3.23566
	73	82	28	69.4391	13.5698	102.006	3.23559
	73	82	37	69.4391	13.5697	102.015	3.23579
	73	82	46	69.4391	13.5699	101.986	3.23503
	73	82	55	69.4391	13.5698	101.986	3.23487
	73	82	64	69.4391	13.5698	101.959	3.23414
	73	82	73	69.4391	13.57	101.974	3.23462
	73	82	82	69.4391	13.5699	101.986	3.2351
	73	82	91	69.4391	13.57	101.911	3.23278
	73	82	100	69.4391	13.5698	101.949	3.23367
	73	91	19	69.4391	13.5698	102.005	3.23549
	73	91	28	69.4391	13.5698	102.001	3.23539
	73	91	37	69.4391	13.5698	101.997	3.23531
	73	91	46	69.4391	13.5699	101.995	3.23518
	73	91	55	69.4391	13.5697	102.003	3.23551
	73	91	64	69.4391	13.5698	101.966	3.2343
	73	91	73	69.4391	13.5698	101.955	3.23405
	73	91	82	69.4391	13.5698	102.011	3.23574
	73	91	91	69.4391	13.5697	102.001	3.23529
	73	91	100	69.4391	13.5698	101.975	3.23482
	73	100	19	69.4391	13.5697	102.003	3.23548
	73	100	28	69.4391	13.5698	101.991	3.23511
	73	100	37	69.4391	13.5698	102.009	3.2356
	73	100	46	69.4391	13.5698	101.973	3.23456
	73	100	55	69.4391	13.5698	101.96	3.23418
	73	100	64	69.4391	13.5699	101.951	3.23396
	73	100	73	69.4391	13.57	101.949	3.23386
	73	100	82	69.4391	13.5697	101.996	3.23513
	73	100	91	69.4391	13.5698	102.015	3.23583
	73	100	100	69.4391	13.5701	101.901	3.23244
	82	19	19	69.4391	13.5698	102.004	3.23552
	82	19	28	69.4391	13.5698	101.994	3.23519
	82	19	37	69.4391	13.5698	101.985	3.23489
	82	19	46	69.4391	13.5699	101.968	3.23445
	82	19	55	69.4391	13.5698	101.989	3.23494
	82	19	64	69.4391	13.5698	102.003	3.23555
	82	19	73	69.4391	13.5698	102.011	3.23563
	82	19	82	69.4391	13.5697	101.974	3.23447
	82	19	91	69.4391	13.5698	102.004	3.2356
	82	19	100	69.4391	13.5698	101.937	3.2334
	82	28	19	69.4391	13.5698	101.994	3.2352
	82	28	28	69.4391	13.5698	101.999	3.2354
	82	28	37	69.4391	13.5698	101.976	3.23466
	82	28	46	69.4391	13.5699	101.967	3.23439
	82	28	55	69.4391	13.5699	101.961	3.23423
	82	28	64	69.4391	13.5699	101.985	3.23482
	82	28	73	69.4391	13.5699	102.008	3.23565
	82	28	82	69.4391	13.5697	102.004	3.23542
	82	28	91	69.4391	13.5699	101.936	3.23346
	82	28	100	69.4391	13.5698	101.944	3.23378
	82	37	19	69.4391	13.5698	102.005	3.23554
	82	37	28	69.4391	13.5698	101.987	3.235
	82	37	37	69.4391	13.5697	102.004	3.23553
	82	37	46	69.4391	13.5699	101.965	3.23439
	82	37	55	69.4391	13.5697	101.987	3.23495
	82	37	64	69.4391	13.57	101.963	3.23431
	82	37	73	69.4391	13.5698	101.965	3.23447
	82	37	82	69.4391	13.5699	101.957	3.2342
	82	37	91	69.4391	13.5697	101.988	3.23502
	82	37	100	69.4391	13.5699	101.931	3.23327
	82	46	19	69.4391	13.5698	101.995	3.23527
	82	46	28	69.4391	13.5698	101.988	3.23499
	82	46	37	69.4391	13.5698	101.98	3.2348
	82	46	46	69.4391	13.5697	102.014	3.23575
	82	46	55	69.4391	13.5698	101.965	3.23429
	82	46	64	69.4391	13.5699	101.952	3.23398
	82	46	73	69.4391	13.5698	101.962	3.23418
	82	46	82	69.4391	13.57	101.927	3.23328
	82	46	91	69.4391	13.57	101.928	3.23324
	82	46	100	69.4391	13.5698	102.015	3.23581
	82	55	19	69.4391	13.5701	101.948	3.23395
	82	55	28	69.4391	13.5691	102.086	3.23763
	82	55	37	69.4391	13.5698	102.014	3.23583
	82	55	46	69.4391	13.5698	102.007	3.2356
	82	55	55	69.4391	13.5697	102.006	3.23557
	82	55	64	69.4391	13.5699	101.95	3.23388
	82	55	73	69.4391	13.5699	101.947	3.23384
	82	55	82	69.4391	13.5699	101.928	3.23325
	82	55	91	69.4391	13.5698	102.011	3.23563
	82	55	100	69.4391	13.5697	102.005	3.23551
	82	64	19	69.4391	13.5697	101.998	3.23525
	82	64	28	69.4391	13.5697	102.015	3.23579
	82	64	37	69.4391	13.5689	102.215	3.24193
	82	64	46	69.4391	13.5699	101.963	3.23432
	82	64	55	69.4391	13.5698	101.971	3.2345
	82	64	64	69.4391	13.5699	101.951	3.23394
	82	64	73	69.4391	13.5699	101.98	3.23467
	82	64	82	69.4391	13.5699	102.008	3.23566
	82	64	91	69.4391	13.57	101.925	3.2332
	82	64	100	69.4391	13.5699	101.914	3.23278
	82	73	19	69.4391	13.5698	102.004	3.23554
	82	73	28	69.4391	13.5698	101.995	3.23522
	82	73	37	69.4391	13.5698	102.013	3.23574
	82	73	46	69.4391	13.5698	101.997	3.23523
	82	73	55	69.4391	13.5699	101.958	3.23414
	82	73	64	69.4391	13.5697	102.006	3.23554
	82	73	73	69.4391	13.5698	102.011	3.23567
	82	73	82	69.4391	13.5697	101.995	3.2351
	82	73	91	69.4391	13.57	101.964	3.23452
	82	73	100	69.4391	13.5697	101.997	3.23533
	82	82	19	69.4391	13.5698	102.013	3.23579
	82	82	28	69.4391	13.5698	101.987	3.23499
	82	82	37	69.4391	13.5698	101.984	3.23489
	82	82	46	69.4391	13.5697	102.004	3.23553
	82	82	55	69.4391	13.57	101.967	3.23448
	82	82	64	69.4391	13.5698	101.993	3.23526
	82	82	73	69.4391	13.5701	101.967	3.23446
	82	82	82	69.4391	13.5701	101.923	3.23313
	82	82	91	69.4391	13.5701	101.955	3.23415
	82	82	100	69.4391	13.5699	101.995	3.23538
	82	91	19	69.4391	13.5697	102.013	3.23574
	82	91	28	69.4391	13.5698	101.989	3.23504
	82	91	37	69.4391	13.5698	101.981	3.23479
	82	91	46	69.4391	13.5699	101.973	3.23459
	82	91	55	69.4391	13.5698	102.01	3.23569
	82	91	64	69.4391	13.5698	101.957	3.23412
	82	91	73	69.4391	13.57	101.979	3.23472
	82	91	82	69.4391	13.57	101.927	3.23326
	82	91	91	69.4391	13.5698	101.948	3.23382
	82	91	100	69.4391	13.5701	101.922	3.23298
	82	100	19	69.4391	13.5698	102.003	3.23549
	82	100	28	69.4391	13.5698	101.991	3.23512
	82	100	37	69.4391	13.5699	102.001	3.23548
	82	100	46	69.4391	13.5698	101.98	3.2348
	82	100	55	69.4391	13.5697	102.005	3.23559
	82	100	64	69.4391	13.57	101.944	3.23372
	82	100	73	69.4391	13.57	101.961	3.23427
	82	100	82	69.4391	13.5698	101.976	3.23474
	82	100	91	69.4391	13.5699	101.968	3.23444
	82	100	100	69.4391	13.5699	101.936	3.23334
	91	19	19	69.4391	13.5697	102.008	3.23566
	91	19	28	69.4391	13.5698	102.012	3.23574
	91	19	37	69.4391	13.5698	102.002	3.23541
	91	19	46	69.4391	13.5697	101.992	3.23507
	91	19	55	69.4391	13.5698	102	3.23547
	91	19	64	69.4391	13.5699	101.963	3.23424
	91	19	73	69.4391	13.57	101.985	3.23495
	91	19	82	69.4391	13.5698	102.015	3.23584
	91	19	91	69.4391	13.5698	101.964	3.2344
	91	19	100	69.4391	13.5697	102.007	3.23558
	91	28	19	69.4391	13.5698	101.995	3.23523
	91	28	28	69.4391	13.5697	102.012	3.23569
	91	28	37	69.4391	13.5699	101.989	3.23508
	91	28	46	69.4391	13.5698	101.982	3.23491
	91	28	55	69.4391	13.5698	102.005	3.2356
	91	28	64	69.4391	13.5698	101.994	3.23512
	91	28	73	69.4391	13.5699	101.941	3.23371
	91	28	82	69.4391	13.5701	101.956	3.23411
	91	28	91	69.4391	13.5698	101.991	3.23524
	91	28	100	69.4391	13.57	101.909	3.23271
	91	37	19	69.4391	13.5697	102.008	3.23563
	91	37	28	69.4391	13.5698	101.999	3.23531
	91	37	37	69.4391	13.5699	101.983	3.23487
	91	37	46	69.4391	13.5697	101.994	3.23516
	91	37	55	69.4391	13.5699	101.971	3.23448
	91	37	64	69.4391	13.5699	102	3.23538
	91	37	73	69.4391	13.57	101.955	3.23404
	91	37	82	69.4391	13.5698	102.011	3.23577
	91	37	91	69.4391	13.5702	101.931	3.23338
	91	37	100	69.4391	13.5699	101.982	3.23467
	91	46	19	69.4391	13.5698	102	3.23538
	91	46	28	69.4391	13.5698	101.989	3.23507
	91	46	37	69.4391	13.5698	101.981	3.23478
	91	46	46	69.4391	13.5699	101.964	3.23433
	91	46	55	69.4391	13.5699	101.964	3.23429
	91	46	64	69.4391	13.5698	101.99	3.23515
	91	46	73	69.4391	13.5699	101.938	3.23361
	91	46	82	69.4391	13.5701	101.95	3.23391
	91	46	91	69.4391	13.5697	101.966	3.23436
	91	46	100	69.4391	13.57	101.98	3.23495
	91	55	19	69.4391	13.5698	101.998	3.23532
	91	55	28	69.4391	13.5698	101.998	3.23528
	91	55	37	69.4391	13.5697	102.012	3.23572
	91	55	46	69.4391	13.5698	101.984	3.23496
	91	55	55	69.4391	13.5697	101.983	3.23483
	91	55	64	69.4391	13.57	101.947	3.2339
	91	55	73	69.4391	13.5698	101.963	3.2343
	91	55	82	69.4391	13.57	101.939	3.23364
	91	55	91	69.4391	13.5699	101.923	3.2331
	91	55	100	69.4391	13.5697	101.999	3.23523
	91	64	19	69.4391	13.5698	102.002	3.23537
	91	64	28	69.4391	13.5698	102.013	3.23579
	91	64	37	69.4391	13.5698	102.012	3.23577
	91	64	46	69.4391	13.5699	101.967	3.23438
	91	64	55	69.4391	13.5698	101.975	3.23475
	91	64	64	69.4391	13.5698	102.014	3.23576
	91	64	73	69.4391	13.5701	101.965	3.23441
	91	64	82	69.4391	13.5699	101.943	3.23377
	91	64	91	69.4391	13.57	101.912	3.23281
	91	64	100	69.4391	13.5699	101.936	3.2335
	91	73	19	69.4391	13.5698	102.017	3.23582
	91	73	28	69.4391	13.5697	102.003	3.23544
	91	73	37	69.4391	13.5697	102.003	3.23545
	91	73	46	69.4391	13.5699	101.965	3.23434
	91	73	55	69.4391	13.5698	101.991	3.23501
	91	73	64	69.4391	13.5698	101.981	3.23493
	91	73	73	69.4391	13.5699	101.994	3.23523
	91	73	82	69.4391	13.5701	101.945	3.23388
	91	73	91	69.4391	13.5698	101.987	3.23486
	91	73	100	69.4391	13.5699	101.986	3.23491
	91	82	19	69.4391	13.5697	102.017	3.23587
	91	82	28	69.4391	13.5697	102.002	3.2354
	91	82	37	69.4391	13.5698	102.001	3.23535
	91	82	46	69.4391	13.5698	101.971	3.23457
	91	82	55	69.4391	13.5698	102.015	3.23583
	91	82	64	69.4391	13.5699	101.954	3.23396
	91	82	73	69.4391	13.5699	101.944	3.23372
	91	82	82	69.4391	13.5701	101.936	3.23344
	91	82	91	69.4391	13.5697	102.014	3.23582
	91	82	100	69.4391	13.5701	101.906	3.23259
	91	91	19	69.4391	13.5697	102	3.23537
	91	91	28	69.4391	13.5697	101.998	3.2353
	91	91	37	69.4391	13.5698	101.992	3.23524
	91	91	46	69.4391	13.5698	102.005	3.2356
	91	91	55	69.4391	13.5698	101.969	3.2345
	91	91	64	69.4391	13.57	101.973	3.23462
	91	91	73	69.4391	13.57	101.951	3.23388
	91	91	82	69.4391	13.5697	101.993	3.23515
	91	91	91	69.4391	13.5699	101.951	3.23386
	91	91	100	69.4391	13.5701	101.918	3.23294
	91	100	19	69.4391	13.5698	102.01	3.23563
	91	100	28	69.4391	13.5697	101.996	3.23522
	91	100	37	69.4391	13.5698	101.985	3.2349
	91	100	46	69.4391	13.5699	101.982	3.23485
	91	100	55	69.4391	13.5699	101.959	3.23419
	91	100	64	69.4391	13.5697	102.011	3.23575
	91	100	73	69.4391	13.5697	102.01	3.2357
	91	100	82	69.4391	13.5699	101.985	3.23498
	91	100	91	69.4391	13.57	101.946	3.23373
	91	100	100	69.4391	13.57	101.906	3.23266
	100	19	19	69.4391	13.5698	102.016	3.23583
	100	19	28	69.4391	13.5698	101.989	3.23505
	100	19	37	69.4391	13.5698	102.007	3.23556
	100	19	46	69.4391	13.5697	102.01	3.23562
	100	19	55	69.4391	13.5699	101.969	3.23438
	100	19	64	69.4391	13.5697	101.993	3.23515
	100	19	73	69.4391	13.5699	101.946	3.2338
	100	19	82	69.4391	13.5699	101.967	3.23423
	100	19	91	69.4391	13.57	101.916	3.23289
	100	19	100	69.4391	13.5701	101.94	3.23379
	100	28	19	69.4391	13.5698	101.999	3.23533
	100	28	28	69.4391	13.5698	102.011	3.2357
	100	28	37	69.4391	13.5698	102.006	3.23555
	100	28	46	69.4391	13.5699	101.973	3.2346
	100	28	55	69.4391	13.5698	101.976	3.23473
	100	28	64	69.4391	13.5699	101.953	3.23397
	100	28	73	69.4391	13.5698	101.958	3.23413
	100	28	82	69.4391	13.5697	101.99	3.23498
	100	28	91	69.4391	13.57	101.922	3.23304
	100	28	100	69.4391	13.5701	101.905	3.23259
	100	37	19	69.4391	13.5697	102.002	3.23543
	100	37	28	69.4391	13.5698	101.991	3.23508
	100	37	37	69.4391	13.5697	102.014	3.23578
	100	37	46	69.4391	13.5699	101.968	3.23444
	100	37	55	69.4391	13.5698	102.004	3.23559
	100	37	64	69.4391	13.5699	101.979	3.23489
	100	37	73	69.4391	13.5699	101.943	3.23368
	100	37	82	69.4391	13.57	101.982	3.23484
	100	37	91	69.4391	13.5699	101.941	3.23353
	100	37	100	69.4391	13.5697	102.012	3.23564
	100	46	19	69.4391	13.5698	102.01	3.23569
	100	46	28	69.4391	13.5698	101.993	3.23515
	100	46	37	69.4391	13.5698	101.99	3.23506
	100	46	46	69.4391	13.5699	101.976	3.23465
	100	46	55	69.4391	13.5699	101.988	3.23498
	100	46	64	69.4391	13.5699	101.948	3.23379
	100	46	73	69.4391	13.5699	101.947	3.2338
	100	46	82	69.4391	13.5697	102.014	3.23581
	100	46	91	69.4391	13.5698	101.982	3.235
	100	46	100	69.4391	13.5701	101.909	3.23271
	100	55	19	69.4391	13.5698	102	3.23538
	100	55	28	69.4391	13.5698	102.003	3.23552
	100	55	37	69.4391	13.5698	101.997	3.23529
	100	55	46	69.4391	13.5699	101.966	3.23438
	100	55	55	69.4391	13.5699	101.981	3.23489
	100	55	64	69.4391	13.5698	101.964	3.23422
	100	55	73	69.4391	13.5698	102	3.2354
	100	55	82	69.4391	13.5698	101.949	3.23376
	100	55	91	69.4391	13.57	101.92	3.23307
	100	55	100	69.4391	13.5697	101.998	3.23544
	100	64	19	69.4391	13.5696	102.019	3.23617
	100	64	28	69.4391	13.5698	101.994	3.2352
	100	64	37	69.4391	13.5698	102	3.23536
	100	64	46	69.4391	13.5698	102.014	3.23582
	100	64	55	69.4391	13.5697	102.012	3.23568
	100	64	64	69.4391	13.57	101.972	3.23468
	100	64	73	69.4391	13.5697	102.011	3.23566
	100	64	82	69.4391	13.5698	102.003	3.23544
	100	64	91	69.4391	13.57	101.967	3.23447
	100	64	100	69.4391	13.5699	101.945	3.23393
	100	73	19	69.4391	13.5698	101.981	3.23482
	100	73	28	69.4391	13.5698	102.009	3.23568
	100	73	37	69.4391	13.5698	102.001	3.23548
	100	73	46	69.4391	13.5699	101.973	3.23464
	100	73	55	69.4391	13.5699	101.955	3.23404
	100	73	64	69.4391	13.5699	101.95	3.23394
	100	73	73	69.4391	13.5699	101.941	3.23368
	100	73	82	69.4391	13.5698	101.982	3.23501
	100	73	91	69.4391	13.5698	102.014	3.2358
	100	73	100	69.4391	13.5702	101.933	3.23345
	100	82	19	69.4391	13.5697	102.011	3.23567
	100	82	28	69.4391	13.5698	101.985	3.23493
	100	82	37	69.4391	13.5698	102.002	3.23549
	100	82	46	69.4391	13.5698	101.998	3.23542
	100	82	55	69.4391	13.5699	102.002	3.23547
	100	82	64	69.4391	13.5697	102.015	3.23578
	100	82	73	69.4391	13.5699	101.946	3.23383
	100	82	82	69.4391	13.5697	102.003	3.23554
	100	82	91	69.4391	13.5698	101.955	3.2341
	100	82	100	69.4391	13.5701	101.913	3.23272
	100	91	19	69.4391	13.5698	102	3.23538
	100	91	28	69.4391	13.5698	102.003	3.23545
	100	91	37	69.4391	13.5698	101.984	3.23485
	100	91	46	69.4391	13.5699	101.979	3.23486
	100	91	55	69.4391	13.5698	102.014	3.23582
	100	91	64	69.4391	13.5699	101.951	3.23395
	100	91	73	69.4391	13.5701	101.942	3.23372
	100	91	82	69.4391	13.57	101.953	3.23413
	100	91	91	69.4391	13.5698	101.975	3.23466
	100	91	100	69.4391	13.57	101.919	3.23302
	100	100	19	69.4391	13.5698	102.002	3.23543
	100	100	28	69.4391	13.5698	101.991	3.23518
	100	100	37	69.4391	13.5698	101.983	3.23494
	100	100	46	69.4391	13.5698	101.982	3.23477
	100	100	55	69.4391	13.5699	101.982	3.23496
	100	100	64	69.4391	13.5698	101.965	3.23428
	100	100	73	69.4391	13.5697	101.985	3.23482
	100	100	82	69.4391	13.5699	101.935	3.23344
	100	100	91	69.4391	13.5699	101.932	3.23332
	100	100	100	69.4391	13.57	101.937	3.23348
				190.948	0	0	0
				190.948	0	0	0
				190.948	0	0	0
				190.948	0	0	0
				190.948	0	0	0

## Sheet: ex_Freund
Extended Freundlich Equation																17														31	0.001
Daten														Model										MPSD
P					Freundlich		Si					Freundlich		P					Si							P	P	Si	Si
c0	ce	qe	ce	qe	Kf	n	c0	ce	qe	ce	qe	Kf	n	ce	qe	x,P	y,P	z,P	x,Si	y,Si	z,Si	ce	qe			(q,exp-q,cal)/qexp^2		(q,exp-q,cal)/qexp^2
µmol/L	µmol/L	µmol/g	mg/L	mg/g			µmol/L	µmol/L	µmol/g	mg/L	mg/g													nm	np		MPSD		MPSD	MPSD,komp
4.973	115.194	335.006	3.571	10.3852	15.5	0.14	9.23	312.456	118.624	8.78	3.33333	7.6	0.6	3.571	11.8818	0.112816	0.154975	0.656605	0.780369	27.3085	0.412538	8.78	2.95388	33	6	0.0207665	0.0675965	0.0129587	0.0984087	16.6005
4.973	70.5806	332.736	2.188	10.3148			9.23	298.007	112.825	8.374	3.17037			2.188	10.9977							8.374	3.32369			0.00438317		0.00233865
4.973	29.5161	290.896	0.915	9.01778			9.23	261.423	148.992	7.346	4.18667			0.915	9.69021							7.346	3.83699			0.00556023		0.00697585
4.973	6.70968	243.984	0.208	7.56349			9.23	218.221	174.999	6.132	4.91746			0.208	7.73411							6.132	5.04718			0.000508877		0.000695913
5.102	115.548	363.202	3.582	11.2593			13.99	477.224	152.893	13.41	4.2963			3.582	10.6629							13.41	5.0842			0.00280564		0.0336324
5.102	73.2903	338.112	2.272	10.4815			13.99	442.705	204.297	12.44	5.74074			2.272	9.99571							12.44	5.42521			0.0021479		0.00302105
5.102	31.2903	296.201	0.97	9.18222			13.99	393.95	230.921	11.07	6.48889			0.97	8.79957							11.07	6.26799			0.00173667		0.00115891
5.102	9.83871	245.622	0.305	7.61429			13.99	332.633	262.272	9.347	7.36984			0.305	7.42106							9.347	7.4032			0.000643975		2.04829e-05
5.116	109.226	413.381	3.386	12.8148			9.197	312.918	106.498	8.793	2.99259			3.386	11.7641							8.793	3.01815			0.00672304		7.29236e-05
5.116	66.1613	366.189	2.051	11.3519			9.197	296.512	114.011	8.332	3.2037			2.051	10.8827							8.332	3.38042			0.00170766		0.00304278
5.116	26.0645	308.817	0.808	9.57333			9.197	264.057	140.53	7.42	3.94889			0.808	9.45072							7.42	4.05754			0.000164034		0.000757003
5.116	6.70968	251.306	0.208	7.79048			9.197	215.196	177.936	6.047	5			0.208	7.7609							6.047	4.96289			1.44124e-05		5.5078e-05
5.107	114.548	371.804	3.551	11.5259			14.05	474.377	189.798	13.33	5.33333			3.551	10.6632							13.33	5.06127			0.00560217		0.00260229
5.107	72.6129	341.219	2.251	10.5778			14.05	446.619	197.707	12.55	5.55556			2.251	9.95373							12.55	5.5033			0.00348049		8.84683e-05
5.107	32.0323	294.91	0.993	9.14222			14.05	394.306	234.875	11.08	6.6			0.993	8.83627							11.08	6.22625			0.00111998		0.00320674
5.107	9.22581	246.851	0.286	7.65238			14.05	333.132	264.87	9.361	7.44286			0.286	7.32819							9.361	7.56385			0.00179482		0.000264267
4.864	116.032	302.748	3.597	9.38519			21.97	740.569	305.786	20.81	8.59259			3.597	9.34452							20.81	8.80461			1.87722e-05		0.000608836
4.864	81.3871	279.689	2.523	8.67037			21.97	688.256	346.646	19.34	9.74074			2.523	8.92757							19.34	9.05333			0.000879981		0.00498029
4.864	47.2903	243.584	1.466	7.55111			21.97	620.641	358.244	17.44	10.0667			1.466	8.30134							17.44	9.52389			0.00987101		0.00290719
4.864	16.5161	222.837	0.512	6.90794			21.97	543.772	377.902	15.28	10.619			0.512	7.05211							15.28	11.2521			0.00043558		0.00355441
133.63	133.629	591.935	4.1425	18.35			0	0	0	0	0			4.1425	18.9125							0	0			0.000939593
133.63	109.952	550.255	3.4085	17.0579			0	0	0	0	0			3.4085	18.4031							0	0			0.00621891
133.63	81.3548	524.946	2.522	16.2733			0	0	0	0	0			2.522	17.6431							0	0			0.00708547
133.63	54.8871	460.732	1.7015	14.2827			0	0	0	0	0			1.7015	16.6974							0	0			0.0285825
133.63	13.8387	403.431	0.429	12.5063			0	0	0	0	0			0.429	13.7682							0	0			0.0101794
0	0	0	0	0			374.99	335.27	993.099	9.42109	27.9061			0	0							9.42109	29.1927					0.00212572
0	0	0	0	0			374.99	302.395	907.487	8.49731	25.5004			0	0							8.49731	27.4399					0.00578479
0	0	0	0	0			374.99	258.781	871.598	7.27175	24.4919			0	0							7.27175	24.9918					0.000416509
0	0	0	0	0			374.99	222.208	763.933	6.24403	21.4665			0	0							6.24403	22.8083					0.00390696
0	0	0	0	0			374.99	163.416	634.734	4.04	19.492			0	0							4.04	17.5648					0.00977595
0	0	0	0	0			374.99	121.158	507.672	2.89	15.2947			0	0							2.89	14.3665					0.00368245
0	0	0	0	0			374.99	57.5136	476.221	1.62	13.376			0	0							1.62	10.1513					0.0581194
0	0	0	0	0			374.99	29.0538	345.94	0.816412	9.72092			0	0							0.816412	6.72913					0.0947213

## Sheet: exFreundbatch
				Si							Si
	x,P	y,P	z,P	x,Si	y,Si	z,Si		x,P	y,P	z,P	x,Si	y,Si	z,Si
irun							MPSD
1	0.45	0.45	0.45	0.45	2.575	0.45	15.9899	0.168059	0.160187	0.655474	0.767607	26.7742	0.395508																	0
2	0.45	0.45	0.45	0.45	2.575	0.8	15.9899	0.16805	0.160194	0.655461	0.767593	26.7733	0.395507
3	0.45	0.45	0.45	0.45	2.575	1.15	15.9899	0.168058	0.160188	0.655474	0.76761	26.7743	0.395508
4	0.45	0.45	0.45	0.45	2.575	1.5	1000	-0.987746	1.015	-0.140454	0.0001	4.41512	0.196271
5	0.45	0.45	0.45	0.45	5.05	0.45	15.9899	0.168055	0.160196	0.655455	0.767581	26.7727	0.395506
6	0.45	0.45	0.45	0.45	5.05	0.8	15.9899	0.168056	0.160187	0.655478	0.767568	26.7718	0.395503
7	0.45	0.45	0.45	0.45	5.05	1.15	15.9899	0.168049	0.160196	0.655456	0.767618	26.7747	0.395513
8	0.45	0.45	0.45	0.45	5.05	1.5	15.9899	0.168047	0.160198	0.65545	0.767572	26.7722	0.395502
9	0.45	0.45	0.45	0.45	7.525	0.45	15.9899	0.168064	0.160181	0.655489	0.767573	26.7721	0.395502
10	0.45	0.45	0.45	0.45	7.525	0.8	15.9899	0.16805	0.160194	0.655461	0.767566	26.7719	0.395501
11	0.45	0.45	0.45	0.45	7.525	1.15	15.9899	0.16805	0.160194	0.655462	0.767574	26.7724	0.395505
12	0.45	0.45	0.45	0.45	7.525	1.5	15.9899	0.168055	0.160191	0.65547	0.767575	26.7723	0.395508
13	0.45	0.45	0.45	0.45	10	0.45	15.9899	0.168055	0.160186	0.655478	0.767612	26.7743	0.39551
14	0.45	0.45	0.45	0.45	10	0.8	15.9899	0.168061	0.160176	0.655503	0.767576	26.7723	0.395502
15	0.45	0.45	0.45	0.45	10	1.15	15.9899	0.16806	0.160177	0.655501	0.767567	26.7717	0.395501
16	0.45	0.45	0.45	0.45	10	1.5	15.9899	0.16806	0.160184	0.655485	0.76759	26.7731	0.395505
17	0.45	0.45	0.45	0.8	2.575	0.45	1000	0.0484789	0.845526	-0.126441	0.0001	5.83222	0.109306
18	0.45	0.45	0.45	0.8	2.575	0.8	1000	-0.175552	0.873369	-0.128295	0.0001	3.94864	0.0746345
19	0.45	0.45	0.45	0.8	2.575	1.15	1000	-0.798503	0.989908	-0.156687	0.0001	4.52571	0.19504
	0.45	0.45	0.45	0.8	2.575	1.5	1000	-0.589724	0.866619	-0.190571	0.0001	4.36611	0.187574
	0.45	0.45	0.45	0.8	5.05	0.45	15.9899	0.168057	0.160173	0.655515	0.767597	26.7737	0.395505
	0.45	0.45	0.45	0.8	5.05	0.8	15.9899	0.168047	0.160186	0.655481	0.76759	26.7731	0.395504
	0.45	0.45	0.45	0.8	5.05	1.15	15.9899	0.16805	0.160198	0.655452	0.767616	26.7748	0.395517
	0.45	0.45	0.45	0.8	5.05	1.5	15.9899	0.168058	0.160185	0.655481	0.767587	26.7731	0.395509
	0.45	0.45	0.45	0.8	7.525	0.45	15.9899	0.168061	0.160196	0.655454	0.767609	26.7744	0.39551
	0.45	0.45	0.45	0.8	7.525	0.8	15.9899	0.168065	0.160173	0.655516	0.767614	26.7748	0.395509
	0.45	0.45	0.45	0.8	7.525	1.15	15.9899	0.168061	0.160176	0.655503	0.767579	26.7727	0.395503
	0.45	0.45	0.45	0.8	7.525	1.5	1000	0.178541	-0.0306594	-0.00730568	0.0001	7.57375	1.31789
	0.45	0.45	0.45	0.8	10	0.45	15.9899	0.168055	0.160184	0.655487	0.767568	26.7719	0.395502
	0.45	0.45	0.45	0.8	10	0.8	1000	0.107972	0.567559	-0.0349941	0.276549	10.082	0.297401
	0.45	0.45	0.45	0.8	10	1.15	15.9899	0.168068	0.160176	0.655505	0.767597	26.7736	0.395504
	0.45	0.45	0.45	0.8	10	1.5	15.9899	0.168061	0.16019	0.655472	0.767625	26.7755	0.395516
	0.45	0.45	0.45	1.15	2.575	0.45	1000	-0.265882	0.842742	-0.0439894	0.0001	3.3532	0.252005
	0.45	0.45	0.45	1.15	2.575	0.8	15.9899	0.168048	0.160194	0.655457	0.767631	26.7756	0.395513
	0.45	0.45	0.45	1.15	2.575	1.15	1000	-0.950917	1.01518	-0.00318411	0.0001	4.41313	0.212143
	0.45	0.45	0.45	1.15	2.575	1.5	1000	-0.304984	0.857292	-0.116681	0.0001	3.61855	0.213212
	0.45	0.45	0.45	1.15	5.05	0.45	15.9899	0.168056	0.160186	0.655478	0.76757	26.7719	0.395502
	0.45	0.45	0.45	1.15	5.05	0.8	1000	-0.221612	1.04457	-0.197356	0.045234	5.18212	0.279067
	0.45	0.45	0.45	1.15	5.05	1.15	15.9899	0.168053	0.160195	0.655455	0.767611	26.7748	0.395512
	0.45	0.45	0.45	1.15	5.05	1.5	1000	0.956005	0.388752	-0.0631871	0.0574679	5.30974	0.169484
	0.45	0.45	0.45	1.15	7.525	0.45	15.9899	0.168062	0.160174	0.655512	0.767612	26.7746	0.395511
	0.45	0.45	0.45	1.15	7.525	0.8	15.9899	0.168051	0.160192	0.655467	0.767575	26.7722	0.395506
	0.45	0.45	0.45	1.15	7.525	1.15	15.9899	0.168053	0.160197	0.655451	0.767602	26.7739	0.395508
	0.45	0.45	0.45	1.15	7.525	1.5	1000	0.0422618	0.801757	-0.214362	0.187173	7.06663	0.192019
	0.45	0.45	0.45	1.15	10	0.45	15.9899	0.16806	0.16018	0.655496	0.767571	26.772	0.395501
	0.45	0.45	0.45	1.15	10	0.8	15.9899	0.168056	0.160186	0.65548	0.767579	26.7725	0.395509
	0.45	0.45	0.45	1.15	10	1.15	15.9899	0.168049	0.160193	0.65546	0.767577	26.7723	0.395506
	0.45	0.45	0.45	1.15	10	1.5	15.9899	0.168057	0.160181	0.655492	0.767571	26.7721	0.395502
	0.45	0.45	0.45	1.5	2.575	0.45	1000	0.0518114	-0.255054	-0.220798	0.3	2.78246	0.773734
	0.45	0.45	0.45	1.5	2.575	0.8	1000	0.113451	-0.145911	-0.116958	0.3	2.77938	1.20725
	0.45	0.45	0.45	1.5	2.575	1.15	1000	0.161768	-0.0603593	-0.0355625	0.3	2.77713	1.59693
	0.45	0.45	0.45	1.5	2.575	1.5	1000	0.128304	-0.119612	-0.0919364	0.0001	2.82528	2.07562
	0.45	0.45	0.45	1.5	5.05	0.45	1000	0.139085	-0.100523	-0.0737744	0.0001	5.18149	0.824267
	0.45	0.45	0.45	1.5	5.05	0.8	1000	0.167099	-0.0509202	-0.026582	0.0001	5.17952	1.25717
	0.45	0.45	0.45	1.5	5.05	1.15	1000	0.18245	-0.0237388	-0.000721326	0.0001	5.17794	1.64404
	0.45	0.45	0.45	1.5	5.05	1.5	1000	0.181637	-0.0251785	-0.00209102	0.0001	5.17673	1.99687
	0.45	0.45	0.45	1.5	7.525	0.45	15.9899	0.168059	0.16018	0.655494	0.767568	26.7719	0.395501
	0.45	0.45	0.45	1.5	7.525	0.8	1000	0.0559706	0.83609	-0.093969	0.223067	7.51868	0.328903
	0.45	0.45	0.45	1.5	7.525	1.15	15.9899	0.168064	0.160185	0.65548	0.767605	26.7743	0.395513
	0.45	0.45	0.45	1.5	7.525	1.5	1000	-0.231085	0.760824	-0.0711001	0.18279	6.99678	0.172322
	0.45	0.45	0.45	1.5	10	0.45	1000	-0.0124958	0.779288	-0.0375721	0.316559	7.57189	0.297573
	0.45	0.45	0.45	1.5	10	0.8	15.9899	0.168058	0.160182	0.655491	0.767632	26.7759	0.395513
	0.45	0.45	0.45	1.5	10	1.15	15.9899	0.168058	0.16018	0.655495	0.767568	26.7719	0.395501
	0.45	0.45	0.45	1.5	10	1.5	1000	-0.00470843	0.812695	-0.12275	0.303529	9.4905	0.228023
	0.45	0.45	0.8	0.45	2.575	0.45	15.9899	0.168032	0.160233	0.655363	0.767572	26.7717	0.395501
	0.45	0.45	0.8	0.45	2.575	0.8	15.9899	0.168042	0.160198	0.65545	0.76761	26.7745	0.395509
	0.45	0.45	0.8	0.45	2.575	1.15	1000	0.0282907	0.832738	-0.0251399	0.589144	17.3641	0.364124
	0.45	0.45	0.8	0.45	2.575	1.5	1000	0.172469	0.507244	-0.154361	0.0001	4.16099	0.482078
	0.45	0.45	0.8	0.45	5.05	0.45	15.9899	0.168062	0.160172	0.655512	0.767625	26.7754	0.395514
	0.45	0.45	0.8	0.45	5.05	0.8	15.9899	0.168054	0.160189	0.655469	0.76761	26.7747	0.39551
	0.45	0.45	0.8	0.45	5.05	1.15	1000	0.0458504	0.786578	-0.0176526	0.579876	16.2535	0.367516
	0.45	0.45	0.8	0.45	5.05	1.5	15.9899	0.16806	0.160185	0.655482	0.767569	26.7719	0.395501
	0.45	0.45	0.8	0.45	7.525	0.45	15.9899	0.168059	0.160185	0.655484	0.767568	26.7719	0.395503
	0.45	0.45	0.8	0.45	7.525	0.8	15.9899	0.168051	0.16019	0.65547	0.76757	26.772	0.395502
	0.45	0.45	0.8	0.45	7.525	1.15	15.9899	0.168055	0.160187	0.655479	0.767572	26.7722	0.3955
	0.45	0.45	0.8	0.45	7.525	1.5	15.9899	0.16806	0.160181	0.655492	0.76757	26.772	0.395503
	0.45	0.45	0.8	0.45	10	0.45	15.9899	0.168054	0.160188	0.655471	0.767585	26.7731	0.395509
	0.45	0.45	0.8	0.45	10	0.8	15.9899	0.168056	0.160189	0.655473	0.767573	26.7721	0.395503
	0.45	0.45	0.8	0.45	10	1.15	15.9899	0.168058	0.160181	0.655491	0.76757	26.772	0.395501
	0.45	0.45	0.8	0.45	10	1.5	15.9899	0.168061	0.160182	0.655488	0.767576	26.7725	0.395501
	0.45	0.45	0.8	0.8	2.575	0.45	1000	-0.191576	0.591452	-0.225847	0.0001	4.35914	0.125627
	0.45	0.45	0.8	0.8	2.575	0.8	15.9899	0.168046	0.160207	0.655426	0.767588	26.773	0.395506
	0.45	0.45	0.8	0.8	2.575	1.15	15.9899	0.168058	0.160181	0.655493	0.76757	26.772	0.395502
	0.45	0.45	0.8	0.8	2.575	1.5	15.9899	0.16806	0.160181	0.655492	0.767572	26.7721	0.395504
	0.45	0.45	0.8	0.8	5.05	0.45	15.9899	0.16806	0.160177	0.655503	0.767603	26.7742	0.395507
	0.45	0.45	0.8	0.8	5.05	0.8	15.9899	0.16806	0.160178	0.6555	0.767573	26.7722	0.395502
	0.45	0.45	0.8	0.8	5.05	1.15	1000	0.0309975	0.825753	-0.0153304	0.601596	18.0816	0.365231
	0.45	0.45	0.8	0.8	5.05	1.5	15.9899	0.168047	0.160195	0.655461	0.767617	26.7749	0.395511
	0.45	0.45	0.8	0.8	7.525	0.45	15.9899	0.168063	0.160176	0.655508	0.767605	26.7743	0.395507
	0.45	0.45	0.8	0.8	7.525	0.8	15.9899	0.168045	0.160218	0.655382	0.767595	26.7736	0.39553
	0.45	0.45	0.8	0.8	7.525	1.15	15.9899	0.168062	0.160179	0.655498	0.767569	26.7718	0.395504
	0.45	0.45	0.8	0.8	7.525	1.5	15.9899	0.168056	0.16019	0.655474	0.767573	26.7722	0.395503
	0.45	0.45	0.8	0.8	10	0.45	15.9899	0.168057	0.160189	0.655474	0.767571	26.7721	0.395505
	0.45	0.45	0.8	0.8	10	0.8	15.9899	0.16806	0.160179	0.655497	0.767571	26.7721	0.395501
	0.45	0.45	0.8	0.8	10	1.15	15.9899	0.168057	0.160183	0.655488	0.767569	26.7719	0.395501
	0.45	0.45	0.8	0.8	10	1.5	15.9899	0.16806	0.160177	0.655506	0.767593	26.7734	0.395505
	0.45	0.45	0.8	1.15	2.575	0.45	15.9899	0.168049	0.160186	0.655481	0.767581	26.7728	0.395503
	0.45	0.45	0.8	1.15	2.575	0.8	15.9899	0.168049	0.160203	0.655439	0.767588	26.7733	0.395506
	0.45	0.45	0.8	1.15	2.575	1.15	1000	-2.01382	0.986072	-0.564228	0.0001	6.66868	0.153803
	0.45	0.45	0.8	1.15	2.575	1.5	1000	-0.386957	0.662753	-0.227009	0.0001	4.29377	0.216423
	0.45	0.45	0.8	1.15	5.05	0.45	15.9899	0.168053	0.160186	0.65548	0.767596	26.7737	0.395503
	0.45	0.45	0.8	1.15	5.05	0.8	1000	-0.53724	1.17015	-0.0300971	0.0694028	5.18458	0.326993
	0.45	0.45	0.8	1.15	5.05	1.15	15.9899	0.168055	0.160178	0.655501	0.767592	26.7734	0.39551
	0.45	0.45	0.8	1.15	5.05	1.5	1000	0.0124772	0.686106	-0.210555	0.0615832	5.26953	0.277849
	0.45	0.45	0.8	1.15	7.525	0.45	15.9899	0.168049	0.160195	0.655459	0.767582	26.7727	0.395502
	0.45	0.45	0.8	1.15	7.525	0.8	15.9899	0.168054	0.160186	0.655481	0.767571	26.772	0.3955
	0.45	0.45	0.8	1.15	7.525	1.15	15.9899	0.168058	0.160182	0.655488	0.767569	26.7719	0.395502
	0.45	0.45	0.8	1.15	7.525	1.5	15.9899	0.168058	0.160182	0.655492	0.767569	26.7719	0.395501
	0.45	0.45	0.8	1.15	10	0.45	15.9899	0.168062	0.160184	0.655484	0.767572	26.7721	0.395501
	0.45	0.45	0.8	1.15	10	0.8	15.9899	0.168058	0.160192	0.655459	0.767591	26.7733	0.395508
	0.45	0.45	0.8	1.15	10	1.15	15.9899	0.168052	0.160189	0.655475	0.767571	26.772	0.395502
	0.45	0.45	0.8	1.15	10	1.5	15.9899	0.168035	0.160205	0.655433	0.76756	26.7714	0.395503
	0.45	0.45	0.8	1.5	2.575	0.45	1000	0.302899	-0.122791	-0.00697539	0.0001	2.83427	0.841648
	0.45	0.45	0.8	1.5	2.575	0.8	1000	0.168575	0.814193	-0.0502117	0.0001	2.90326	0.921117
	0.45	0.45	0.8	1.5	2.575	1.15	1000	-1.32562	0.982079	-0.0126872	0.0001	4.24908	0.223884
	0.45	0.45	0.8	1.5	2.575	1.5	15.9899	0.168056	0.160179	0.655498	0.767595	26.7735	0.395506
	0.45	0.45	0.8	1.5	5.05	0.45	15.9899	0.168059	0.160178	0.655497	0.767581	26.7725	0.395505
	0.45	0.45	0.8	1.5	5.05	0.8	15.9899	0.16806	0.160178	0.655499	0.767574	26.7722	0.395502
	0.45	0.45	0.8	1.5	5.05	1.15	15.9899	0.168057	0.160189	0.655471	0.767579	26.7727	0.395506
	0.45	0.45	0.8	1.5	5.05	1.5	15.9899	0.16806	0.160181	0.655491	0.767586	26.7731	0.3955
	0.45	0.45	0.8	1.5	7.525	0.45	15.9899	0.168058	0.160182	0.65549	0.767569	26.7719	0.395501
	0.45	0.45	0.8	1.5	7.525	0.8	15.9899	0.168059	0.16018	0.655494	0.767589	26.773	0.3955
	0.45	0.45	0.8	1.5	7.525	1.15	15.9899	0.168058	0.160182	0.65549	0.767571	26.772	0.395502
	0.45	0.45	0.8	1.5	7.525	1.5	15.9899	0.168054	0.16019	0.655466	0.767601	26.7738	0.395504
	0.45	0.45	0.8	1.5	10	0.45	15.9899	0.168059	0.160185	0.655478	0.767572	26.7722	0.395503
	0.45	0.45	0.8	1.5	10	0.8	15.9899	0.16806	0.160176	0.655503	0.767578	26.7725	0.395504
	0.45	0.45	0.8	1.5	10	1.15	15.9899	0.168053	0.160185	0.655482	0.76758	26.7724	0.395502
	0.45	0.45	0.8	1.5	10	1.5	15.9899	0.168054	0.160192	0.655466	0.767584	26.7728	0.395505
	0.45	0.45	1.15	0.45	2.575	0.45	1000	0.0230658	0.850215	-0.0539409	0.57785	16.8541	0.351886
	0.45	0.45	1.15	0.45	2.575	0.8	1000	0.13047	0.3112	-0.08225	0.0001	4.49797	0.336268
	0.45	0.45	1.15	0.45	2.575	1.15	1000	0.047485	0.801145	-0.0148024	0.495587	13.9721	0.34868
	0.45	0.45	1.15	0.45	2.575	1.5	15.9899	0.168041	0.160202	0.65544	0.767595	26.7735	0.395503
	0.45	0.45	1.15	0.45	5.05	0.45	1000	0.0285797	0.821068	-0.026145	0.456149	12.818	0.341128
	0.45	0.45	1.15	0.45	5.05	0.8	15.9899	0.168058	0.160182	0.65549	0.767569	26.7719	0.395501
	0.45	0.45	1.15	0.45	5.05	1.15	1000	-0.00458812	0.861378	-0.0712446	0.526946	14.5016	0.345443
	0.45	0.45	1.15	0.45	5.05	1.5	1000	0.0307336	0.774624	-0.000165744	0.608904	17.9616	0.36273
	0.45	0.45	1.15	0.45	7.525	0.45	15.9899	0.168059	0.16018	0.655491	0.767577	26.7724	0.395504
	0.45	0.45	1.15	0.45	7.525	0.8	15.9899	0.168061	0.160185	0.655478	0.767585	26.7729	0.395501
	0.45	0.45	1.15	0.45	7.525	1.15	15.9899	0.168044	0.160192	0.655468	0.767606	26.7742	0.395505
	0.45	0.45	1.15	0.45	7.525	1.5	15.9899	0.168055	0.160189	0.655478	0.767585	26.7729	0.395502
	0.45	0.45	1.15	0.45	10	0.45	15.9899	0.168067	0.160172	0.655517	0.767591	26.7734	0.395504
	0.45	0.45	1.15	0.45	10	0.8	15.9899	0.168057	0.160183	0.655494	0.767579	26.7725	0.395503
	0.45	0.45	1.15	0.45	10	1.15	15.9899	0.168058	0.160194	0.655463	0.767578	26.7724	0.395503
	0.45	0.45	1.15	0.45	10	1.5	15.9899	0.168058	0.160185	0.655482	0.767567	26.7718	0.395501
	0.45	0.45	1.15	0.8	2.575	0.45	1000	0.0282137	0.825109	-0.0136951	0.59474	17.8239	0.365103
	0.45	0.45	1.15	0.8	2.575	0.8	15.9899	0.168058	0.160185	0.655483	0.767591	26.7735	0.395505
	0.45	0.45	1.15	0.8	2.575	1.15	1000	0.0252795	0.785755	-0.0154913	0.593959	17.1712	0.377821
	0.45	0.45	1.15	0.8	2.575	1.5	1000	-0.383854	0.36112	-0.161155	0.0001	3.09797	0.0001
	0.45	0.45	1.15	0.8	5.05	0.45	15.9899	0.168047	0.160196	0.65545	0.767585	26.773	0.395503
	0.45	0.45	1.15	0.8	5.05	0.8	1000	0.0229066	0.817747	-0.00891109	0.508763	14.2314	0.341622
	0.45	0.45	1.15	0.8	5.05	1.15	1000	0.00405209	0.961224	-0.161928	0.692714	19.2996	0.417409
	0.45	0.45	1.15	0.8	5.05	1.5	1000	0.0193882	0.808524	-0.015508	0.488293	13.605	0.34485
	0.45	0.45	1.15	0.8	7.525	0.45	15.9899	0.168066	0.16017	0.655524	0.767584	26.7728	0.395508
	0.45	0.45	1.15	0.8	7.525	0.8	15.9899	0.168056	0.160185	0.655482	0.767571	26.7721	0.3955
	0.45	0.45	1.15	0.8	7.525	1.15	15.9899	0.168057	0.160194	0.655458	0.767584	26.7728	0.395503
	0.45	0.45	1.15	0.8	7.525	1.5	15.9899	0.16806	0.160186	0.655479	0.767569	26.7718	0.395501
	0.45	0.45	1.15	0.8	10	0.45	15.9899	0.168055	0.160191	0.655467	0.767579	26.7726	0.395502
	0.45	0.45	1.15	0.8	10	0.8	15.9899	0.168054	0.160184	0.655491	0.767616	26.7748	0.395515
	0.45	0.45	1.15	0.8	10	1.15	15.9899	0.168059	0.160188	0.655473	0.767577	26.7724	0.395508
	0.45	0.45	1.15	0.8	10	1.5	15.9899	0.168055	0.160186	0.655478	0.767568	26.7718	0.395501
	0.45	0.45	1.15	1.15	2.575	0.45	15.9899	0.16806	0.160182	0.655495	0.767576	26.7724	0.395504
	0.45	0.45	1.15	1.15	2.575	0.8	1000	0.0225763	0.787303	-0.0200489	0.47082	12.3404	0.346515
	0.45	0.45	1.15	1.15	2.575	1.15	1000	0.0357258	0.800112	-0.00935788	0.621346	18.5344	0.364318
	0.45	0.45	1.15	1.15	2.575	1.5	1000	0.0249735	0.769899	-0.0137318	0.530352	14.6895	0.391064
	0.45	0.45	1.15	1.15	5.05	0.45	1000	0.0330356	0.789817	-0.0289396	0.556988	14.9575	0.362968
	0.45	0.45	1.15	1.15	5.05	0.8	15.9899	0.168064	0.160178	0.655502	0.767583	26.7727	0.395503
	0.45	0.45	1.15	1.15	5.05	1.15	1000	0.0299655	0.815484	-0.0274384	0.605639	16.9975	0.383024
	0.45	0.45	1.15	1.15	5.05	1.5	15.9899	0.16805	0.160191	0.655469	0.767571	26.7721	0.395504
	0.45	0.45	1.15	1.15	7.525	0.45	15.9899	0.168049	0.160195	0.655457	0.767587	26.7731	0.395505
	0.45	0.45	1.15	1.15	7.525	0.8	15.9899	0.168048	0.160195	0.65546	0.767572	26.7722	0.395503
	0.45	0.45	1.15	1.15	7.525	1.15	15.9899	0.168051	0.16019	0.655472	0.767571	26.772	0.395502
	0.45	0.45	1.15	1.15	7.525	1.5	15.9899	0.168051	0.160194	0.655461	0.767584	26.773	0.395501
	0.45	0.45	1.15	1.15	10	0.45	15.9899	0.168059	0.160184	0.655484	0.767573	26.7721	0.395504
	0.45	0.45	1.15	1.15	10	0.8	15.9899	0.168054	0.160193	0.655465	0.767572	26.7722	0.3955
	0.45	0.45	1.15	1.15	10	1.15	15.9899	0.168054	0.160185	0.655481	0.767578	26.7726	0.395508
	0.45	0.45	1.15	1.15	10	1.5	15.9899	0.168055	0.160184	0.655486	0.767579	26.7725	0.395508
	0.45	0.45	1.15	1.5	2.575	0.45	15.9899	0.16806	0.160186	0.655481	0.767574	26.7723	0.395502
	0.45	0.45	1.15	1.5	2.575	0.8	1000	0.0201715	0.813767	-0.0142885	0.505718	14.1629	0.353144
	0.45	0.45	1.15	1.5	2.575	1.15	1000	-0.0390509	0.838932	-0.0381407	0.479502	13.8378	0.360234
	0.45	0.45	1.15	1.5	2.575	1.5	1000	0.0410378	0.779216	-0.00848598	0.424892	11.6321	0.337401
	0.45	0.45	1.15	1.5	5.05	0.45	1000	0.0581272	0.813141	-0.00872974	0.571958	16.7017	0.357489
	0.45	0.45	1.15	1.5	5.05	0.8	1000	0.055899	0.773146	-0.0145061	0.522839	14.6141	0.354414
	0.45	0.45	1.15	1.5	5.05	1.15	15.9899	0.168054	0.160185	0.655483	0.767582	26.7728	0.395507
	0.45	0.45	1.15	1.5	5.05	1.5	1000	-1.02483	0.371672	-0.106073	0.0001	5.35171	0.183499
	0.45	0.45	1.15	1.5	7.525	0.45	15.9899	0.168058	0.160186	0.655481	0.767569	26.7719	0.395502
	0.45	0.45	1.15	1.5	7.525	0.8	15.9899	0.168056	0.160186	0.655479	0.767577	26.7724	0.395502
	0.45	0.45	1.15	1.5	7.525	1.15	15.9899	0.168052	0.160192	0.655468	0.767569	26.772	0.395502
	0.45	0.45	1.15	1.5	7.525	1.5	1000	-0.931411	0.346553	-0.0415071	0.0001	7.72162	0.0001
	0.45	0.45	1.15	1.5	10	0.45	15.9899	0.168052	0.160192	0.65546	0.76757	26.7719	0.395501
	0.45	0.45	1.15	1.5	10	0.8	15.9899	0.168061	0.160179	0.6555	0.767575	26.7722	0.395503
	0.45	0.45	1.15	1.5	10	1.15	15.9899	0.168058	0.160181	0.655492	0.767576	26.7723	0.395504
	0.45	0.45	1.15	1.5	10	1.5	15.9899	0.168048	0.160194	0.65546	0.76759	26.773	0.395502
	0.45	0.45	1.5	0.45	2.575	0.45	1000	0.00925598	0.792354	-0.0368927	0.441221	12.3543	0.338698
	0.45	0.45	1.5	0.45	2.575	0.8	1000	0.0405164	0.79232	-0.0545381	0.429721	11.6984	0.336747
	0.45	0.45	1.5	0.45	2.575	1.15	1000	0.026501	0.815609	-0.0171431	0.419133	11.7877	0.331375
	0.45	0.45	1.5	0.45	2.575	1.5	1000	0.0271373	0.788495	-0.00534088	0.340323	10.3856	0.326165
	0.45	0.45	1.5	0.45	5.05	0.45	15.9899	0.168067	0.160174	0.655512	0.767584	26.7729	0.395505
	0.45	0.45	1.5	0.45	5.05	0.8	15.9899	0.168058	0.160182	0.65549	0.767569	26.7719	0.395501
	0.45	0.45	1.5	0.45	5.05	1.15	1000	0.0316021	0.805494	-0.0157059	0.444785	12.1511	0.336838
	0.45	0.45	1.5	0.45	5.05	1.5	1000	0.0322897	0.801823	-0.00648402	0.528893	15.2992	0.356658
	0.45	0.45	1.5	0.45	7.525	0.45	15.9899	0.168029	0.160149	0.655595	0.767395	26.7608	0.3955
	0.45	0.45	1.5	0.45	7.525	0.8	15.9899	0.168049	0.160198	0.655449	0.767613	26.7747	0.39551
	0.45	0.45	1.5	0.45	7.525	1.15	15.9899	0.168059	0.160178	0.655502	0.767574	26.7722	0.395503
	0.45	0.45	1.5	0.45	7.525	1.5	15.9899	0.168056	0.160181	0.655493	0.767598	26.7737	0.395507
	0.45	0.45	1.5	0.45	10	0.45	15.9899	0.168045	0.160187	0.655473	0.76756	26.7715	0.395494
	0.45	0.45	1.5	0.45	10	0.8	15.9899	0.167921	0.160476	0.654684	0.767139	26.7452	0.395338
	0.45	0.45	1.5	0.45	10	1.15	15.9899	0.168058	0.16018	0.655496	0.76757	26.772	0.395501
	0.45	0.45	1.5	0.45	10	1.5	15.9899	0.168062	0.16018	0.655494	0.767572	26.7721	0.3955
	0.45	0.45	1.5	0.8	2.575	0.45	1000	0.0256224	0.710413	-0.0114103	0.379646	10.3494	0.335281
	0.45	0.45	1.5	0.8	2.575	0.8	1000	0.0321239	0.838579	-0.0180876	0.392537	11.5244	0.361476
	0.45	0.45	1.5	0.8	2.575	1.15	1000	0.0270293	0.822318	-0.0241804	0.394575	11.1032	0.330147
	0.45	0.45	1.5	0.8	2.575	1.5	1000	0.0411243	0.860953	-0.0392352	0.56792	16.4994	0.364985
	0.45	0.45	1.5	0.8	5.05	0.45	1000	0.0315763	0.878202	-0.0513242	0.454097	12.6627	0.344818
	0.45	0.45	1.5	0.8	5.05	0.8	1000	0.0417895	0.831364	-0.0517593	0.493743	13.0933	0.356442
	0.45	0.45	1.5	0.8	5.05	1.15	1000	0.0186525	0.851618	-0.044377	0.443772	12.2815	0.333883
	0.45	0.45	1.5	0.8	5.05	1.5	1000	0.0353235	0.771659	-0.0083809	0.445225	12.3508	0.344793
	0.45	0.45	1.5	0.8	7.525	0.45	15.9899	0.168051	0.16019	0.655462	0.767616	26.7748	0.39551
	0.45	0.45	1.5	0.8	7.525	0.8	15.9899	0.168046	0.160199	0.655442	0.767591	26.7732	0.395508
	0.45	0.45	1.5	0.8	7.525	1.15	15.9899	0.168052	0.160191	0.655464	0.767611	26.7743	0.395506
	0.45	0.45	1.5	0.8	7.525	1.5	15.9899	0.168051	0.160195	0.655459	0.767571	26.7721	0.395504
	0.45	0.45	1.5	0.8	10	0.45	15.9899	0.168057	0.160192	0.65546	0.767584	26.773	0.395508
	0.45	0.45	1.5	0.8	10	0.8	15.9899	0.168059	0.160183	0.65549	0.76757	26.772	0.395501
	0.45	0.45	1.5	0.8	10	1.15	15.9899	0.168063	0.160174	0.655514	0.767606	26.7743	0.395507
	0.45	0.45	1.5	0.8	10	1.5	15.9899	0.168055	0.160184	0.655482	0.767575	26.7724	0.395503
	0.45	0.45	1.5	1.15	2.575	0.45	1000	0.0246694	0.739324	-0.0157921	0.395138	10.4918	0.332689
	0.45	0.45	1.5	1.15	2.575	0.8	1000	0.0349067	0.795677	-0.000398489	0.3919	11.0862	0.329605
	0.45	0.45	1.5	1.15	2.575	1.15	1000	0.0106165	0.914914	-0.0727986	0.494881	13.0502	0.336021
	0.45	0.45	1.5	1.15	2.575	1.5	1000	-0.249272	0.255413	-0.688884	0.0001	3.1941	0.0001
	0.45	0.45	1.5	1.15	5.05	0.45	1000	0.0386778	0.808425	-0.0131312	0.467808	13.1951	0.34377
	0.45	0.45	1.5	1.15	5.05	0.8	1000	0.037363	0.765455	-0.011263	0.442539	12.1201	0.329167
	0.45	0.45	1.5	1.15	5.05	1.15	15.9899	0.168056	0.160184	0.655485	0.767574	26.7722	0.395503
	0.45	0.45	1.5	1.15	5.05	1.5	1000	0.0208743	0.89842	-0.073248	0.530781	14.2264	0.353678
	0.45	0.45	1.5	1.15	7.525	0.45	1000	0.0409817	0.816615	-0.00539572	0.538803	14.9983	0.354205
	0.45	0.45	1.5	1.15	7.525	0.8	15.9899	0.168055	0.160185	0.655488	0.767622	26.7754	0.395511
	0.45	0.45	1.5	1.15	7.525	1.15	15.9899	0.16806	0.160177	0.655506	0.767602	26.7738	0.395512
	0.45	0.45	1.5	1.15	7.525	1.5	15.9899	0.168061	0.160178	0.655499	0.767579	26.7724	0.395504
	0.45	0.45	1.5	1.15	10	0.45	15.9899	0.168054	0.160185	0.655485	0.767575	26.7722	0.395504
	0.45	0.45	1.5	1.15	10	0.8	15.9899	0.168061	0.160189	0.655466	0.767594	26.7734	0.395509
	0.45	0.45	1.5	1.15	10	1.15	15.9899	0.168052	0.160195	0.655453	0.76758	26.7728	0.3955
	0.45	0.45	1.5	1.15	10	1.5	15.9899	0.168055	0.16019	0.655471	0.767567	26.7719	0.3955
	0.45	0.45	1.5	1.5	2.575	0.45	1000	0.0269238	0.794504	-0.000829879	0.526734	14.9427	0.352664
	0.45	0.45	1.5	1.5	2.575	0.8	1000	0.0269623	0.799752	-0.0353396	0.480224	12.5857	0.334706
	0.45	0.45	1.5	1.5	2.575	1.15	1000	0.0822055	0.237624	-0.326738	0.0001	3.20765	0.0001
	0.45	0.45	1.5	1.5	2.575	1.5	15.9899	0.168054	0.160187	0.65548	0.767571	26.7719	0.395501
	0.45	0.45	1.5	1.5	5.05	0.45	1000	0.00808174	0.77695	-0.0039686	0.412962	11.5665	0.330129
	0.45	0.45	1.5	1.5	5.05	0.8	1000	0.0194108	0.797047	-0.0502718	0.393769	11.4508	0.309118
	0.45	0.45	1.5	1.5	5.05	1.15	1000	0.0234417	0.788208	-0.018948	0.422185	11.816	0.337278
	0.45	0.45	1.5	1.5	5.05	1.5	1000	0.827142	0.349343	-0.324879	0.0725516	5.43279	0.314202
	0.45	0.45	1.5	1.5	7.525	0.45	15.9899	0.168061	0.160181	0.655493	0.76757	26.772	0.395502
	0.45	0.45	1.5	1.5	7.525	0.8	15.9899	0.168057	0.16018	0.655495	0.767571	26.7721	0.395503
	0.45	0.45	1.5	1.5	7.525	1.15	15.9899	0.168063	0.160176	0.655505	0.767576	26.7724	0.395502
	0.45	0.45	1.5	1.5	7.525	1.5	15.9899	0.168054	0.160183	0.655485	0.767628	26.7755	0.39551
	0.45	0.45	1.5	1.5	10	0.45	15.9899	0.168054	0.16018	0.655494	0.76761	26.7745	0.395508
	0.45	0.45	1.5	1.5	10	0.8	15.9899	0.168054	0.160187	0.655477	0.767568	26.7719	0.395503
	0.45	0.45	1.5	1.5	10	1.15	1000	0.0306855	0.809613	-0.00491711	0.523349	15.1856	0.353071
	0.45	0.45	1.5	1.5	10	1.5	15.9899	0.168058	0.160182	0.655489	0.767569	26.7719	0.395501
	0.45	0.8	0.45	0.45	2.575	0.45	1000	0.282908	0.508217	-0.0363402	0.0001	2.83379	0.0993479
	0.45	0.8	0.45	0.45	2.575	0.8	1000	0.145291	0.322482	-0.322013	0.0001	2.86216	0.0178171
	0.45	0.8	0.45	0.45	2.575	1.15	1000	0.187723	0.434179	-0.123993	0.0001	2.75122	0.72331
	0.45	0.8	0.45	0.45	2.575	1.5	1000	0.0337727	0.355925	-0.196175	0.0001	2.74701	1.07103
	0.45	0.8	0.45	0.45	5.05	0.45	1000	0.281126	0.517382	-0.0159601	0.135437	5.08989	0.0271416
	0.45	0.8	0.45	0.45	5.05	0.8	1000	0.196225	0.441872	-0.113808	0.0001	5.11593	0.0001
	0.45	0.8	0.45	0.45	5.05	1.15	1000	0.18524	0.495797	-0.0103968	0.0001	5.11435	0.548479
	0.45	0.8	0.45	0.45	5.05	1.5	15.9899	0.168052	0.160207	0.655427	0.767559	26.7712	0.395499
	0.45	0.8	0.45	0.45	7.525	0.45	1000	0.297599	0.511362	-0.0420234	0.147128	7.55037	0.0921445
	0.45	0.8	0.45	0.45	7.525	0.8	1000	0.176065	0.411891	-0.170465	0.107331	7.55453	0.0960139
	0.45	0.8	0.45	0.45	7.525	1.15	15.9899	0.168054	0.160175	0.655506	0.767586	26.7726	0.395515
	0.45	0.8	0.45	0.45	7.525	1.5	1000	0.339104	0.531145	-0.0354749	0.0001	7.55527	1.12034
	0.45	0.8	0.45	0.45	10	0.45	1000	0.315348	0.527516	-0.0220861	0.331155	10.011	0.0949064
	0.45	0.8	0.45	0.45	10	0.8	1000	0.170003	0.400026	-0.195208	0.321063	10.0132	0.0328165
	0.45	0.8	0.45	0.45	10	1.15	1000	0.343348	0.541434	-0.0168955	0.0001	10.0244	0.578842
	0.45	0.8	0.45	0.45	10	1.5	1000	0.319896	0.484576	-0.119565	0.0001	10.0236	1.0042
	0.45	0.8	0.45	0.8	2.575	0.45	1000	0.230232	0.495862	-0.0279873	0.0001	2.83458	0.220663
	0.45	0.8	0.45	0.8	2.575	0.8	1000	0.19754	0.46729	-0.0656591	0.0001	2.80126	0.580636
	0.45	0.8	0.45	0.8	2.575	1.15	1000	0.0745466	0.373626	-0.181749	0.0001	2.80279	0.90792
	0.45	0.8	0.45	0.8	2.575	1.5	1000	-0.0155098	0.377553	-0.140435	0.0001	2.78704	1.32432
	0.45	0.8	0.45	0.8	5.05	0.45	1000	0.218549	0.470021	-0.0714805	0.0001	5.1329	0.0001
	0.45	0.8	0.45	0.8	5.05	0.8	1000	0.0807662	0.349808	-0.228936	0.0001	5.15876	0.0659351
	0.45	0.8	0.45	0.8	5.05	1.15	1000	0.0820369	0.431474	-0.0834901	0.0001	5.15021	0.706061
	0.45	0.8	0.45	0.8	5.05	1.5	15.9899	0.16807	0.160173	0.655513	0.767605	26.7742	0.39551
	0.45	0.8	0.45	0.8	7.525	0.45	1000	0.228025	0.485263	-0.0471233	0.4001	7.5518	0.308114
	0.45	0.8	0.45	0.8	7.525	0.8	1000	0.179055	0.470126	-0.052266	0.0001	7.57246	0.352082
	0.45	0.8	0.45	0.8	7.525	1.15	1000	-0.176865	0.39176	-0.0682791	0.0001	7.59347	0.205526
	0.45	0.8	0.45	0.8	7.525	1.5	1000	0.337854	0.528115	-0.040946	0.0001	7.57375	1.31789
	0.45	0.8	0.45	0.8	10	0.45	1000	0.265138	0.481615	-0.0803764	0.186622	10.0307	0.190896
	0.45	0.8	0.45	0.8	10	0.8	1000	0.0753684	0.40991	-0.117706	0.4001	10.0215	0.419409
	0.45	0.8	0.45	0.8	10	1.15	15.9899	0.168064	0.160182	0.655487	0.767573	26.7722	0.395505
	0.45	0.8	0.45	0.8	10	1.5	1000	0.315009	0.472729	-0.140956	0.0001	10.0377	1.16607
	0.45	0.8	0.45	1.15	2.575	0.45	1000	-0.0416312	0.952669	-0.128743	0.0001	4.64377	0.173279
	0.45	0.8	0.45	1.15	2.575	0.8	1000	-0.532844	0.790098	-0.1933	0.0001	4.54849	0.239863
	0.45	0.8	0.45	1.15	2.575	1.15	1000	-0.430561	0.354648	-0.0517563	0.0001	2.91927	0.835406
	0.45	0.8	0.45	1.15	2.575	1.5	15.9899	0.168056	0.160197	0.655453	0.767576	26.7724	0.395502
	0.45	0.8	0.45	1.15	5.05	0.45	1000	0.0470406	0.419613	-0.0915761	0.0001	5.17578	0.0001
	0.45	0.8	0.45	1.15	5.05	0.8	1000	0.119138	0.473434	-0.0268447	0.0001	5.17367	0.643644
	0.45	0.8	0.45	1.15	5.05	1.15	1000	-0.024369	0.434713	-0.046121	0.0001	5.18175	0.97291
	0.45	0.8	0.45	1.15	5.05	1.5	1000	0.105706	1.05559	-0.0943649	0.153167	5.3172	0.268584
	0.45	0.8	0.45	1.15	7.525	0.45	15.9899	0.168059	0.160181	0.655492	0.767568	26.7719	0.395501
	0.45	0.8	0.45	1.15	7.525	0.8	1000	0.141934	0.478303	-0.0257337	0.0001	7.60027	0.600329
	0.45	0.8	0.45	1.15	7.525	1.15	1000	-0.0277037	0.458238	-0.00954353	0.0001	7.60971	0.845741
	0.45	0.8	0.45	1.15	7.525	1.5	15.9899	0.168063	0.16018	0.655497	0.767578	26.7725	0.395507
	0.45	0.8	0.45	1.15	10	0.45	1000	0.185781	0.42881	-0.137655	0.0622421	10.0518	0.195781
	0.45	0.8	0.45	1.15	10	0.8	1000	0.0916803	0.447199	-0.0606925	0.0001	10.0519	0.53131
	0.45	0.8	0.45	1.15	10	1.15	15.9899	0.168059	0.160191	0.655466	0.767574	26.7723	0.395502
	0.45	0.8	0.45	1.15	10	1.5	1000	0.33677	0.525485	-0.0456941	0.0001	10.0503	1.53386
	0.45	0.8	0.45	1.5	2.575	0.45	1000	0.285499	0.401186	-0.270143	0.3	2.78246	0.773734
	0.45	0.8	0.45	1.5	2.575	0.8	1000	0.310964	0.462922	-0.158665	0.3	2.77938	1.20725
	0.45	0.8	0.45	1.5	2.575	1.15	1000	0.330925	0.511315	-0.0712815	0.3	2.77713	1.59693
	0.45	0.8	0.45	1.5	2.575	1.5	1000	0.343673	0.542222	-0.0154729	0.3	2.77523	1.96053
	0.45	0.8	0.45	1.5	5.05	0.45	1000	0.321554	0.488597	-0.112304	0.0001	5.18149	0.824267
	0.45	0.8	0.45	1.5	5.05	0.8	1000	0.333127	0.516654	-0.0616404	0.0001	5.17952	1.25717
	0.45	0.8	0.45	1.5	5.05	1.15	1000	0.339469	0.532029	-0.0338773	0.0001	5.17794	1.64404
	0.45	0.8	0.45	1.5	5.05	1.5	1000	0.339133	0.531215	-0.0353478	0.0001	5.17673	1.99687
	0.45	0.8	0.45	1.5	7.525	0.45	1000	0.347006	0.550303	-0.000880115	0.0001	7.6128	0.798319
	0.45	0.8	0.45	1.5	7.525	0.8	15.9899	0.168055	0.160187	0.655476	0.7676	26.7738	0.395507
	0.45	0.8	0.45	1.5	7.525	1.15	1000	0.0697715	0.76749	-0.00802713	0.221748	7.58008	0.309873
	0.45	0.8	0.45	1.5	7.525	1.5	1000	0.341562	0.537103	-0.0247156	0.0001	7.60983	1.92615
	0.45	0.8	0.45	1.5	10	0.45	1000	0.148102	0.484769	-0.0293361	0.00912406	10.0695	0.310763
	0.45	0.8	0.45	1.5	10	0.8	15.9899	0.168065	0.160181	0.655491	0.767557	26.7712	0.395499
	0.45	0.8	0.45	1.5	10	1.15	15.9899	0.168054	0.160195	0.655457	0.767598	26.7738	0.395515
	0.45	0.8	0.45	1.5	10	1.5	1000	0.338971	0.530823	-0.0360565	0.0001	10.0638	1.85984
	0.45	0.8	0.8	0.45	2.575	0.45	15.9899	0.168045	0.160205	0.655432	0.767584	26.7729	0.395504
	0.45	0.8	0.8	0.45	2.575	0.8	1000	0.255163	0.683836	-0.022705	0.0001	4.38409	0.0303879
	0.45	0.8	0.8	0.45	2.575	1.15	1000	0.346586	0.254438	-0.126725	0.0001	2.85983	0.260997
	0.45	0.8	0.8	0.45	2.575	1.5	1000	0.316466	0.204586	-0.179297	0.0001	2.80144	0.842558
	0.45	0.8	0.8	0.45	5.05	0.45	15.9899	0.168053	0.160192	0.655464	0.767589	26.7731	0.395503
	0.45	0.8	0.8	0.45	5.05	0.8	15.9899	0.168056	0.160189	0.655473	0.767572	26.772	0.395505
	0.45	0.8	0.8	0.45	5.05	1.15	1000	0.331992	0.284024	-0.0462612	0.0001	5.1441	0.0001
	0.45	0.8	0.8	0.45	5.05	1.5	1000	0.239828	0.104541	-0.27594	0.0001	5.14994	0.454906
	0.45	0.8	0.8	0.45	7.525	0.45	1000	0.189912	0.216802	-0.0423492	0.129824	7.5529	0.4001
	0.45	0.8	0.8	0.45	7.525	0.8	1000	0.174824	0.600847	-0.0186643	0.0970169	7.59609	0.30985
	0.45	0.8	0.8	0.45	7.525	1.15	1000	0.287471	0.222233	-0.109737	0.0001	7.55695	0.0001
	0.45	0.8	0.8	0.45	7.525	1.5	1000	0.1443	0.0121655	-0.353587	0.0001	7.58195	0.224134
	0.45	0.8	0.8	0.45	10	0.45	15.9899	0.168057	0.160184	0.655484	0.767569	26.7719	0.395502
	0.45	0.8	0.8	0.45	10	0.8	1000	0.0521763	0.715357	-0.0239185	0.301436	10.0876	0.332483
	0.45	0.8	0.8	0.45	10	1.15	1000	0.169506	0.0410933	-0.324	0.8001	9.99292	0.325665
	0.45	0.8	0.8	0.45	10	1.5	15.9899	0.168057	0.160186	0.65548	0.767593	26.7734	0.395505
	0.45	0.8	0.8	0.8	2.575	0.45	1000	0.228579	0.598106	-0.0438243	0.0001	3.58594	0.278919
	0.45	0.8	0.8	0.8	2.575	0.8	1000	0.336476	0.238805	-0.14167	0.0001	2.9348	0.0001
	0.45	0.8	0.8	0.8	2.575	1.15	1000	0.323004	0.214765	-0.16879	0.0001	2.8696	0.611192
	0.45	0.8	0.8	0.8	2.575	1.5	1000	0.296436	0.175278	-0.208875	0.0001	2.82972	1.14493
	0.45	0.8	0.8	0.8	5.05	0.45	1000	0.282049	0.279121	-0.00125685	0.0944403	5.13049	0.0155024
	0.45	0.8	0.8	0.8	5.05	0.8	15.9899	0.16806	0.160177	0.655501	0.767581	26.7726	0.395502
	0.45	0.8	0.8	0.8	5.05	1.15	1000	0.301485	0.18262	-0.201373	0.0001	5.18065	0.235354
	0.45	0.8	0.8	0.8	5.05	1.5	1000	0.234413	0.0985259	-0.281348	0.0001	5.17364	0.803078
	0.45	0.8	0.8	0.8	7.525	0.45	1000	0.192424	0.613798	-0.0126821	0.0893106	6.71724	0.278767
	0.45	0.8	0.8	0.8	7.525	0.8	15.9899	0.168059	0.160182	0.655491	0.767569	26.7719	0.395502
	0.45	0.8	0.8	0.8	7.525	1.15	1000	0.293241	0.21798	-0.123992	0.0001	7.59347	0.205526
	0.45	0.8	0.8	0.8	7.525	1.5	1000	0.138104	0.00700544	-0.357572	0.0001	7.60363	0.53985
	0.45	0.8	0.8	0.8	10	0.45	1000	0.209794	0.63237	-0.0247062	0.146298	10.0478	0.821814
	0.45	0.8	0.8	0.8	10	0.8	1000	0.308859	0.193137	-0.190972	0.752697	10.0085	0.2288
	0.45	0.8	0.8	0.8	10	1.15	1000	0.223478	0.0867136	-0.29183	0.0001	10.0372	0.116558
	0.45	0.8	0.8	0.8	10	1.5	1000	0.204545	0.233858	-0.0304122	0.0001	10.046	0.729657
	0.45	0.8	0.8	1.15	2.575	0.45	1000	0.281457	0.236885	-0.0769381	0.0001	2.95535	0.0001
	0.45	0.8	0.8	1.15	2.575	0.8	1000	0.249895	0.116032	-0.265476	0.0001	2.93396	0.376098
	0.45	0.8	0.8	1.15	2.575	1.15	1000	0.257798	0.125351	-0.256865	0.0001	2.88977	0.968057
	0.45	0.8	0.8	1.15	2.575	1.5	1000	0.249458	0.115525	-0.265942	0.0001	2.86253	1.47036
	0.45	0.8	0.8	1.15	5.05	0.45	15.9899	0.168058	0.160176	0.655509	0.767613	26.7748	0.395511
	0.45	0.8	0.8	1.15	5.05	0.8	1000	0.315192	0.251448	-0.0869951	0.0001	5.19901	0.214548
	0.45	0.8	0.8	1.15	5.05	1.15	1000	0.274732	0.146283	-0.237122	0.0001	5.20274	0.694877
	0.45	0.8	0.8	1.15	5.05	1.5	1000	0.233936	0.0980013	-0.281818	0.0001	5.19506	1.21674
	0.45	0.8	0.8	1.15	7.525	0.45	15.9899	0.168059	0.160179	0.655497	0.767575	26.7724	0.395505
	0.45	0.8	0.8	1.15	7.525	0.8	1000	0.327421	0.284895	-0.0385547	0.0001	7.60952	0.20011
	0.45	0.8	0.8	1.15	7.525	1.15	1000	0.265809	0.135083	-0.247755	0.0001	7.62143	0.544168
	0.45	0.8	0.8	1.15	7.525	1.5	1000	0.192409	0.0553536	-0.318748	0.0001	7.62151	1.03569
	0.45	0.8	0.8	1.15	10	0.45	1000	0.040784	0.835046	-0.145028	0.0550589	10.0684	0.175365
	0.45	0.8	0.8	1.15	10	0.8	1000	0.304325	0.202975	-0.165922	0.0001	10.054	0.13131
	0.45	0.8	0.8	1.15	10	1.15	1000	0.249141	0.115158	-0.266279	0.0001	10.0672	0.451794
	0.45	0.8	0.8	1.15	10	1.5	1000	0.0536733	0.457324	-0.00705953	0.4001	10.0671	0.373038
	0.45	0.8	0.8	1.5	2.575	0.45	1000	0.0730409	0.834481	-0.141497	0.0001	5.36402	0.451517
	0.45	0.8	0.8	1.5	2.575	0.8	1000	0.0146188	0.211758	-0.000718448	0.0001	2.92054	0.871032
	0.45	0.8	0.8	1.5	2.575	1.15	1000	0.126238	0.181397	-0.0745508	0.0001	2.89049	1.42737
	0.45	0.8	0.8	1.5	2.575	1.5	1000	0.213695	0.24107	-0.0237452	0.0001	2.86947	1.90114
	0.45	0.8	0.8	1.5	5.05	0.45	1000	0.171427	0.155439	-0.13455	0.0001	5.21775	0.0242671
	0.45	0.8	0.8	1.5	5.05	0.8	1000	0.113124	-0.0129867	-0.372644	0.0001	5.2352	0.427583
	0.45	0.8	0.8	1.5	5.05	1.15	1000	-0.496905	0.29401	-0.0119397	0.0001	5.30814	0.0001
	0.45	0.8	0.8	1.5	5.05	1.5	1000	-1.26911	0.0973276	-0.0555157	0.0001	5.3475	0.180735
	0.45	0.8	0.8	1.5	7.525	0.45	1000	0.217695	0.131045	-0.207528	0.0001	7.61767	0.0001
	0.45	0.8	0.8	1.5	7.525	0.8	1000	0.196668	0.0594746	-0.315287	0.0001	7.63963	0.371115
	0.45	0.8	0.8	1.5	7.525	1.15	1000	0.191401	0.0543858	-0.319557	0.0001	7.64098	0.954824
	0.45	0.8	0.8	1.5	7.525	1.5	1000	-1.04898	0.173338	-0.0489826	0.0001	7.71734	0.0001
	0.45	0.8	0.8	1.5	10	0.45	15.9899	0.168047	0.160198	0.655449	0.767584	26.7727	0.395507
	0.45	0.8	0.8	1.5	10	0.8	1000	0.225717	0.0890972	-0.28973	0.0001	10.0801	0.358061
	0.45	0.8	0.8	1.5	10	1.15	1000	0.203542	0.0662398	-0.309555	0.0001	10.0848	0.881777
	0.45	0.8	0.8	1.5	10	1.5	1000	-0.889909	0.229413	-0.0125586	0.0001	10.1348	0.0001
	0.45	0.8	1.15	0.45	2.575	0.45	1000	-0.189788	0.640171	-0.000687316	0.0001	4.86074	0.0001
	0.45	0.8	1.15	0.45	2.575	0.8	1000	-0.0893553	0.671239	-0.0335487	0.0001	4.21443	0.283899
	0.45	0.8	1.15	0.45	2.575	1.15	1000	0.0525624	0.663169	-0.14826	0.0001	6.4119	0.127853
	0.45	0.8	1.15	0.45	2.575	1.5	1000	0.331561	0.513106	-0.0239831	0.0001	3.37532	0.20022
	0.45	0.8	1.15	0.45	5.05	0.45	15.9899	0.168054	0.160188	0.655472	0.767574	26.7723	0.395502
	0.45	0.8	1.15	0.45	5.05	0.8	15.9899	0.168057	0.160187	0.655477	0.767567	26.7718	0.395501
	0.45	0.8	1.15	0.45	5.05	1.15	15.9899	0.168057	0.160177	0.655499	0.767582	26.7727	0.395505
	0.45	0.8	1.15	0.45	5.05	1.5	15.9899	0.168059	0.160175	0.655506	0.767551	26.7707	0.395494
	0.45	0.8	1.15	0.45	7.525	0.45	1000	0.384874	-0.22653	-0.631559	0.150971	7.58581	0.139363
	0.45	0.8	1.15	0.45	7.525	0.8	1000	0.130976	0.632997	-0.050891	0.111066	7.57697	0.0464491
	0.45	0.8	1.15	0.45	7.525	1.15	15.9899	0.168059	0.16018	0.655496	0.76757	26.772	0.395502
	0.45	0.8	1.15	0.45	7.525	1.5	1000	0.11969	0.644225	-0.0354329	0.255163	8.19553	0.224221
	0.45	0.8	1.15	0.45	10	0.45	1000	0.387809	-0.222915	-0.644253	0.323997	10.0411	0.17001
	0.45	0.8	1.15	0.45	10	0.8	1000	0.131191	0.6165	-0.0510347	0.299172	10.0326	0.0967798
	0.45	0.8	1.15	0.45	10	1.15	1000	0.121983	0.668098	-0.0949341	0.231787	9.15852	0.500867
	0.45	0.8	1.15	0.45	10	1.5	15.9899	0.168056	0.16018	0.655499	0.767598	26.7739	0.39551
	0.45	0.8	1.15	0.8	2.575	0.45	15.9899	0.168058	0.160181	0.655495	0.76757	26.772	0.395502
	0.45	0.8	1.15	0.8	2.575	0.8	15.9899	0.168059	0.160179	0.655497	0.767572	26.7721	0.395501
	0.45	0.8	1.15	0.8	2.575	1.15	1000	0.199842	0.70384	-0.0724008	0.0001	3.67559	0.093066
	0.45	0.8	1.15	0.8	2.575	1.5	1000	0.387174	-0.104463	-0.380464	0.0001	3.10213	0.0001
	0.45	0.8	1.15	0.8	5.05	0.45	15.9899	0.16806	0.160183	0.65549	0.767588	26.7732	0.39551
	0.45	0.8	1.15	0.8	5.05	0.8	15.9899	0.168055	0.160187	0.655479	0.767571	26.7721	0.395502
	0.45	0.8	1.15	0.8	5.05	1.15	1000	0.225477	0.562513	-0.0426942	0.0717703	5.15112	0.224679
	0.45	0.8	1.15	0.8	5.05	1.5	1000	0.146098	0.490897	-0.0217779	0.0536369	5.20448	0.240294
	0.45	0.8	1.15	0.8	7.525	0.45	15.9899	0.168057	0.160176	0.655506	0.767602	26.774	0.395503
	0.45	0.8	1.15	0.8	7.525	0.8	15.9899	0.168059	0.160182	0.655489	0.767572	26.7721	0.395505
	0.45	0.8	1.15	0.8	7.525	1.15	15.9899	0.168048	0.160188	0.655477	0.767618	26.7751	0.395515
	0.45	0.8	1.15	0.8	7.525	1.5	15.9899	0.168058	0.160183	0.655488	0.767568	26.7719	0.395501
	0.45	0.8	1.15	0.8	10	0.45	1000	0.38102	-0.229584	-0.614752	0.19054	10.0446	0.176881
	0.45	0.8	1.15	0.8	10	0.8	1000	0.0960911	0.694086	-0.0887705	0.0902507	8.76212	0.415568
	0.45	0.8	1.15	0.8	10	1.15	15.9899	0.168058	0.160182	0.65549	0.767569	26.7719	0.395502
	0.45	0.8	1.15	0.8	10	1.5	15.9899	0.168058	0.160179	0.655496	0.767571	26.772	0.395504
	0.45	0.8	1.15	1.15	2.575	0.45	1000	0.173492	0.538819	-0.0787253	0.0001	5.24099	0.17562
	0.45	0.8	1.15	1.15	2.575	0.8	1000	0.244857	0.985018	-0.287849	0.0001	5.25048	0.251493
	0.45	0.8	1.15	1.15	2.575	1.15	1000	0.389471	-0.0157265	-0.209628	0.0001	3.10503	0.0001
	0.45	0.8	1.15	1.15	2.575	1.5	1000	0.370033	-0.256177	-0.601044	0.0001	3.11513	0.435302
	0.45	0.8	1.15	1.15	5.05	0.45	1000	0.0630535	0.715888	-0.163103	0.120495	5.82066	0.337334
	0.45	0.8	1.15	1.15	5.05	0.8	15.9899	0.168051	0.160195	0.655454	0.767573	26.7723	0.395503
	0.45	0.8	1.15	1.15	5.05	1.15	15.9899	0.168054	0.160184	0.655485	0.767576	26.7724	0.395504
	0.45	0.8	1.15	1.15	5.05	1.5	1000	0.373328	-0.190508	-0.484287	0.0001	5.30349	0.0001
	0.45	0.8	1.15	1.15	7.525	0.45	1000	0.0797425	0.686455	-0.14962	0.0126975	7.62199	0.376477
	0.45	0.8	1.15	1.15	7.525	0.8	15.9899	0.168058	0.160181	0.655491	0.767569	26.7719	0.395501
	0.45	0.8	1.15	1.15	7.525	1.15	15.9899	0.168059	0.160186	0.65548	0.767573	26.7722	0.395503
	0.45	0.8	1.15	1.15	7.525	1.5	1000	0.377937	-0.0843372	-0.293371	0.0001	7.67371	0.0001
	0.45	0.8	1.15	1.15	10	0.45	1000	0.369159	-0.265036	-0.623256	0.0750537	10.0609	0.251382
	0.45	0.8	1.15	1.15	10	0.8	15.9899	0.168056	0.160179	0.655503	0.767598	26.774	0.395507
	0.45	0.8	1.15	1.15	10	1.15	1000	0.187752	0.636051	-0.0577195	0.386086	10.2821	0.328409
	0.45	0.8	1.15	1.15	10	1.5	1000	0.376439	-0.0489918	-0.218071	0.0001	10.0993	0.0001
	0.45	0.8	1.15	1.5	2.575	0.45	1000	0.18962	0.536191	-0.0567121	0.0001	4.24623	0.189133
	0.45	0.8	1.15	1.5	2.575	0.8	1000	0.33277	-0.193254	-0.349921	0.0001	3.09965	0.0001
	0.45	0.8	1.15	1.5	2.575	1.15	1000	0.321929	-0.410525	-0.714559	0.0001	3.12189	0.39188
	0.45	0.8	1.15	1.5	2.575	1.5	1000	0.336146	-0.3706	-0.686235	0.0001	3.07483	1.09045
	0.45	0.8	1.15	1.5	5.05	0.45	15.9899	0.16805	0.160205	0.655428	0.76759	26.7732	0.395504
	0.45	0.8	1.15	1.5	5.05	0.8	15.9899	0.168053	0.160189	0.655471	0.767553	26.7707	0.3955
	0.45	0.8	1.15	1.5	5.05	1.15	1000	0.366017	-0.17508	-0.421768	0.0001	5.31634	0.0001
	0.45	0.8	1.15	1.5	5.05	1.5	1000	0.353014	-0.31754	-0.647071	0.0001	5.31364	0.592334
	0.45	0.8	1.15	1.5	7.525	0.45	15.9899	0.168054	0.160186	0.655478	0.767569	26.772	0.395502
	0.45	0.8	1.15	1.5	7.525	0.8	15.9899	0.168062	0.160182	0.655487	0.767566	26.7717	0.395497
	0.45	0.8	1.15	1.5	7.525	1.15	1000	0.382629	-0.0281291	-0.202589	0.0001	7.68712	0.0001
	0.45	0.8	1.15	1.5	7.525	1.5	1000	0.354694	-0.311832	-0.642754	0.0001	7.70531	0.302388
	0.45	0.8	1.15	1.5	10	0.45	1000	0.0278185	0.730207	-0.192297	0.103695	10.0849	0.46356
	0.45	0.8	1.15	1.5	10	0.8	15.9899	0.168054	0.160187	0.655477	0.76757	26.772	0.3955
	0.45	0.8	1.15	1.5	10	1.15	1000	0.388443	0.0296487	-0.113572	0.0001	10.1128	0.0001
	0.45	0.8	1.15	1.5	10	1.5	1000	0.3529	-0.317921	-0.647359	0.0001	10.1342	0.139616
	0.45	0.8	1.5	0.45	2.575	0.45	1000	0.374761	-0.228418	-0.25787	0.0001	6.40927	0.0001
	0.45	0.8	1.5	0.45	2.575	0.8	15.9899	0.168059	0.160176	0.655508	0.767578	26.7725	0.395504
	0.45	0.8	1.5	0.45	2.575	1.15	15.9899	0.168053	0.160184	0.655484	0.767591	26.7735	0.395505
	0.45	0.8	1.5	0.45	2.575	1.5	1000	0.0479279	0.902103	-0.0772787	0.536017	15.8397	0.338034
	0.45	0.8	1.5	0.45	5.05	0.45	15.9899	0.168056	0.160189	0.65547	0.767575	26.7724	0.395506
	0.45	0.8	1.5	0.45	5.05	0.8	15.9899	0.168049	0.160186	0.655483	0.767589	26.7733	0.395507
	0.45	0.8	1.5	0.45	5.05	1.15	15.9899	0.168062	0.160183	0.655486	0.767638	26.7762	0.395513
	0.45	0.8	1.5	0.45	5.05	1.5	15.9899	0.168054	0.160193	0.655461	0.767573	26.7723	0.395507
	0.45	0.8	1.5	0.45	7.525	0.45	1000	0.381584	-0.107343	-0.0819395	0.185533	7.62452	0.266968
	0.45	0.8	1.5	0.45	7.525	0.8	1000	0.380305	-0.154311	-0.121035	0.127449	7.59176	0.192653
	0.45	0.8	1.5	0.45	7.525	1.15	15.9899	0.168059	0.160184	0.655486	0.767573	26.7722	0.395503
	0.45	0.8	1.5	0.45	7.525	1.5	15.9899	0.168058	0.16018	0.655496	0.767597	26.7737	0.395508
	0.45	0.8	1.5	0.45	10	0.45	1000	0.345296	-0.578783	-0.914185	0.333494	10.1082	0.271656
	0.45	0.8	1.5	0.45	10	0.8	15.9899	0.168051	0.160193	0.655466	0.767572	26.7721	0.395504
	0.45	0.8	1.5	0.45	10	1.15	1000	0.392791	0.218964	-0.0369398	0.223675	10.0605	0.0001
	0.45	0.8	1.5	0.45	10	1.5	15.9899	0.168062	0.160185	0.655481	0.767576	26.7722	0.395505
	0.45	0.8	1.5	0.8	2.575	0.45	15.9899	0.168059	0.160181	0.655491	0.767569	26.772	0.395502
	0.45	0.8	1.5	0.8	2.575	0.8	15.9899	0.168056	0.160186	0.655481	0.767573	26.7722	0.395502
	0.45	0.8	1.5	0.8	2.575	1.15	15.9899	0.16806	0.160188	0.655478	0.767587	26.7729	0.395503
	0.45	0.8	1.5	0.8	2.575	1.5	15.9899	0.168058	0.160182	0.655488	0.767572	26.772	0.395501
	0.45	0.8	1.5	0.8	5.05	0.45	15.9899	0.168056	0.160182	0.65549	0.767588	26.7732	0.395501
	0.45	0.8	1.5	0.8	5.05	0.8	15.9899	0.168052	0.160182	0.655491	0.767611	26.7748	0.39551
	0.45	0.8	1.5	0.8	5.05	1.15	15.9899	0.168059	0.160185	0.65548	0.767574	26.7721	0.395501
	0.45	0.8	1.5	0.8	5.05	1.5	15.9899	0.168055	0.160193	0.655461	0.767568	26.7719	0.395504
	0.45	0.8	1.5	0.8	7.525	0.45	15.9899	0.168059	0.160185	0.655483	0.76757	26.772	0.395501
	0.45	0.8	1.5	0.8	7.525	0.8	15.9899	0.168063	0.160182	0.65549	0.767586	26.7729	0.395507
	0.45	0.8	1.5	0.8	7.525	1.15	15.9899	0.168022	0.160205	0.655424	0.767537	26.7703	0.395496
	0.45	0.8	1.5	0.8	7.525	1.5	15.9899	0.168058	0.160183	0.655488	0.767567	26.7718	0.395501
	0.45	0.8	1.5	0.8	10	0.45	1000	0.371213	-0.252587	-0.326414	0.257193	10.0637	0.315392
	0.45	0.8	1.5	0.8	10	0.8	15.9899	0.168064	0.160187	0.655474	0.767594	26.7734	0.395502
	0.45	0.8	1.5	0.8	10	1.15	1000	0.0416819	0.654606	-0.138025	0.260242	9.52975	0.518398
	0.45	0.8	1.5	0.8	10	1.5	15.9899	0.168059	0.160181	0.655493	0.76757	26.772	0.395502
	0.45	0.8	1.5	1.15	2.575	0.45	1000	0.30754	0.580944	-0.0494346	0.0001	6.57055	0.0449507
	0.45	0.8	1.5	1.15	2.575	0.8	15.9899	0.168047	0.160204	0.655434	0.767597	26.7736	0.395507
	0.45	0.8	1.5	1.15	2.575	1.15	15.9899	0.16806	0.160177	0.655505	0.767581	26.7727	0.395504
	0.45	0.8	1.5	1.15	2.575	1.5	15.9899	0.168059	0.160181	0.655491	0.767569	26.7719	0.395502
	0.45	0.8	1.5	1.15	5.05	0.45	15.9899	0.168057	0.160182	0.655493	0.767575	26.7723	0.395503
	0.45	0.8	1.5	1.15	5.05	0.8	15.9899	0.168073	0.160171	0.655525	0.767566	26.7717	0.395495
	0.45	0.8	1.5	1.15	5.05	1.15	15.9899	0.168055	0.16019	0.655471	0.767569	26.772	0.395501
	0.45	0.8	1.5	1.15	5.05	1.5	15.9899	0.168053	0.160192	0.655464	0.767625	26.7752	0.395507
	0.45	0.8	1.5	1.15	7.525	0.45	1000	0.356855	-0.473601	-0.67374	0.0613314	7.64873	0.394493
	0.45	0.8	1.5	1.15	7.525	0.8	15.9899	0.168058	0.160186	0.655481	0.76759	26.7733	0.395507
	0.45	0.8	1.5	1.15	7.525	1.15	15.9899	0.168064	0.160178	0.655501	0.767608	26.7746	0.395509
	0.45	0.8	1.5	1.15	7.525	1.5	15.9899	0.168054	0.160192	0.655471	0.767584	26.773	0.395503
	0.45	0.8	1.5	1.15	10	0.45	1000	0.357535	-0.457103	-0.655299	0.190801	10.0801	0.38513
	0.45	0.8	1.5	1.15	10	0.8	15.9899	0.168056	0.16019	0.655472	0.767577	26.7723	0.3955
	0.45	0.8	1.5	1.15	10	1.15	15.9899	0.168063	0.160197	0.655452	0.76758	26.7726	0.395505
	0.45	0.8	1.5	1.15	10	1.5	15.9899	0.168051	0.160184	0.655487	0.76759	26.773	0.395505
	0.45	0.8	1.5	1.5	2.575	0.45	15.9899	0.168054	0.160188	0.655472	0.767572	26.7722	0.395501
	0.45	0.8	1.5	1.5	2.575	0.8	15.9899	0.168055	0.160195	0.655458	0.767609	26.7743	0.395503
	0.45	0.8	1.5	1.5	2.575	1.15	15.9899	0.168058	0.160188	0.655474	0.767568	26.7719	0.3955
	0.45	0.8	1.5	1.5	2.575	1.5	1000	0.405186	0.116025	-0.000132945	0.0001	4.66591	0.18986
	0.45	0.8	1.5	1.5	5.05	0.45	15.9899	0.168052	0.160196	0.65546	0.767583	26.7729	0.395501
	0.45	0.8	1.5	1.5	5.05	0.8	15.9899	0.168063	0.160181	0.655491	0.76758	26.7725	0.395501
	0.45	0.8	1.5	1.5	5.05	1.15	15.9899	0.168058	0.160184	0.655486	0.767568	26.7718	0.395501
	0.45	0.8	1.5	1.5	5.05	1.5	15.9899	0.168056	0.160181	0.655494	0.767572	26.7721	0.395503
	0.45	0.8	1.5	1.5	7.525	0.45	15.9899	0.168068	0.160173	0.655513	0.767596	26.7737	0.395505
	0.45	0.8	1.5	1.5	7.525	0.8	15.9899	0.168079	0.160146	0.65558	0.767615	26.7751	0.395509
	0.45	0.8	1.5	1.5	7.525	1.15	15.9899	0.168061	0.160174	0.655509	0.767579	26.7726	0.395506
	0.45	0.8	1.5	1.5	7.525	1.5	15.9899	0.16806	0.160179	0.655498	0.767571	26.7721	0.395503
	0.45	0.8	1.5	1.5	10	0.45	1000	0.349683	-0.588502	-0.841181	0.146256	10.1045	0.45497
	0.45	0.8	1.5	1.5	10	0.8	1000	-0.194447	0.880324	-0.228744	0.424094	10.337	0.0944385
	0.45	0.8	1.5	1.5	10	1.15	15.9899	0.168052	0.160189	0.655472	0.767578	26.7725	0.395508
	0.45	0.8	1.5	1.5	10	1.5	15.9899	0.168056	0.160182	0.655497	0.767593	26.7734	0.395505
	0.45	1.15	0.45	0.45	2.575	0.45	1000	0.371108	0.97028	-0.00922254	0.0001	2.83379	0.0993479
	0.45	1.15	0.45	0.45	2.575	0.8	1000	0.305838	0.853882	-0.297471	0.0001	2.86216	0.0178171
	0.45	1.15	0.45	0.45	2.575	1.15	1000	0.330621	0.926974	-0.106878	0.0001	2.74618	0.744763
	0.45	1.15	0.45	0.45	2.575	1.5	1000	0.287894	0.895411	-0.171961	0.0001	2.72538	1.16178
	0.45	1.15	0.45	0.45	5.05	0.45	1000	0.33866	0.953112	-0.038996	0.0001	4.97283	0.289101
	0.45	1.15	0.45	0.45	5.05	0.8	1000	0.329271	0.92344	-0.115976	0.0001	5.11593	0.0001
	0.45	1.15	0.45	0.45	5.05	1.15	1000	0.31975	0.939431	-0.0673836	0.0001	5.11435	0.548479
	0.45	1.15	0.45	0.45	5.05	1.5	1000	0.286343	0.925942	-0.0915992	0.0001	5.11009	1.02642
	0.45	1.15	0.45	0.45	7.525	0.45	1000	0.374344	0.963514	-0.0307591	0.150328	7.55093	0.0568075
	0.45	1.15	0.45	0.45	7.525	0.8	1000	0.32841	0.912901	-0.146658	0.097322	7.55485	0.112319
	0.45	1.15	0.45	0.45	7.525	1.15	1000	0.32866	0.958578	-0.0219791	0.0001	7.55587	0.562119
	0.45	1.15	0.45	0.45	7.525	1.5	1000	0.364521	0.968433	-0.0163836	0.0001	7.55694	1.06432
	0.45	1.15	0.45	0.45	10	0.45	1000	0.382759	0.972753	-0.0100841	0.344461	10.0111	0.0557875
	0.45	1.15	0.45	0.45	10	0.8	1000	0.325716	0.904109	-0.170624	0.289871	10.0143	0.0578058
	0.45	1.15	0.45	0.45	10	1.15	1000	0.368527	0.974246	-0.00169991	0.0501	10.0224	0.563018
	0.45	1.15	0.45	0.45	10	1.5	1000	0.388703	0.955597	-0.0635406	0.0001	10.0236	1.0042
	0.45	1.15	0.45	0.8	2.575	0.45	1000	0.345095	0.955575	-0.0353082	0.0001	2.83458	0.220663
	0.45	1.15	0.45	0.8	2.575	0.8	1000	0.329107	0.93505	-0.0836813	0.0001	2.80126	0.580636
	0.45	1.15	0.45	0.8	2.575	1.15	1000	0.297355	0.901847	-0.158953	0.0001	2.78523	0.985908
	0.45	1.15	0.45	0.8	2.575	1.5	1000	0.338596	0.964486	-0.00857658	0.0001	2.73992	1.52232
	0.45	1.15	0.45	0.8	5.05	0.45	1000	0.339891	0.941287	-0.0721498	0.0001	5.1329	0.0001
	0.45	1.15	0.45	0.8	5.05	0.8	1000	0.350167	0.967371	-0.00542279	0.0001	5.13904	0.465935
	0.45	1.15	0.45	0.8	5.05	1.15	1000	0.266206	0.882008	-0.19831	0.0001	5.15021	0.706061
	0.45	1.15	0.45	0.8	5.05	1.5	1000	0.280873	0.922669	-0.0982942	0.0001	5.13676	1.27272
	0.45	1.15	0.45	0.8	7.525	0.45	1000	0.344308	0.95038	-0.0492797	0.4001	7.5518	0.308114
	0.45	1.15	0.45	0.8	7.525	0.8	1000	0.318888	0.930319	-0.0915956	0.0001	7.57246	0.352082
	0.45	1.15	0.45	0.8	7.525	1.15	1000	0.336339	0.964896	-0.00767006	0.0001	7.57817	0.822103
	0.45	1.15	0.45	0.8	7.525	1.5	1000	0.351592	0.961304	-0.0303587	0.0001	7.57628	1.25199
	0.45	1.15	0.45	0.8	10	0.45	1000	0.360532	0.948068	-0.0658148	0.186166	10.031	0.162613
	0.45	1.15	0.45	0.8	10	0.8	1000	0.276725	0.88817	-0.186414	0.370465	10.0226	0.435429
	0.45	1.15	0.45	0.8	10	1.15	1000	0.292962	0.932805	-0.077089	0.0001	10.0372	0.677645
	0.45	1.15	0.45	0.8	10	1.5	1000	0.386401	0.948296	-0.0828279	0.0001	10.0377	1.16607
	0.45	1.15	0.45	1.15	2.575	0.45	1000	0.322932	0.954065	-0.0329605	0.0001	2.82056	0.544742
	0.45	1.15	0.45	1.15	2.575	0.8	1000	0.296245	0.932185	-0.0786458	0.0001	2.81657	0.925204
	0.45	1.15	0.45	1.15	2.575	1.15	1000	0.303797	0.937245	-0.067986	0.0001	2.80152	1.36489
	0.45	1.15	0.45	1.15	2.575	1.5	1000	0.295822	0.93191	-0.0792218	0.0001	2.79363	1.75269
	0.45	1.15	0.45	1.15	5.05	0.45	1000	0.320328	0.944719	-0.0536576	0.0001	5.16446	0.299467
	0.45	1.15	0.45	1.15	5.05	0.8	1000	0.282007	0.905331	-0.142683	0.0001	5.17367	0.643644
	0.45	1.15	0.45	1.15	5.05	1.15	1000	0.319428	0.948626	-0.0435447	0.0001	5.16251	1.2278
	0.45	1.15	0.45	1.15	5.05	1.5	1000	0.280386	0.922384	-0.0988755	0.0001	5.16204	1.58724
	0.45	1.15	0.45	1.15	7.525	0.45	1000	0.321397	0.959852	-0.0131772	0.1001	7.58967	0.381817
	0.45	1.15	0.45	1.15	7.525	0.8	1000	0.295678	0.916779	-0.117835	0.0001	7.60027	0.600329
	0.45	1.15	0.45	1.15	7.525	1.15	1000	0.311278	0.942532	-0.0567076	0.0001	7.5993	1.11375
	0.45	1.15	0.45	1.15	7.525	1.5	1000	0.31846	0.94975	-0.0445933	0.0001	7.59645	1.53296
	0.45	1.15	0.45	1.15	10	0.45	1000	0.32797	0.918885	-0.12884	0.0667493	10.0514	0.212566
	0.45	1.15	0.45	1.15	10	0.8	1000	0.269587	0.889052	-0.180881	0.0001	10.0519	0.53131
	0.45	1.15	0.45	1.15	10	1.15	1000	0.295515	0.93171	-0.0796391	0.0001	10.0549	1.0106
	0.45	1.15	0.45	1.15	10	1.5	1000	0.346653	0.958227	-0.0367901	0.0001	10.0522	1.4741
	0.45	1.15	0.45	1.5	2.575	0.45	1000	0.372498	0.904202	-0.199308	0.3	2.78246	0.773734
	0.45	1.15	0.45	1.5	2.575	0.8	1000	0.384495	0.942251	-0.0987944	0.3	2.77938	1.20725
	0.45	1.15	0.45	1.5	2.575	1.15	1000	0.3939	0.972077	-0.0200066	0.3	2.77713	1.59693
	0.45	1.15	0.45	1.5	2.575	1.5	1000	0.387386	0.95142	-0.0745745	0.0001	2.82528	2.07562
	0.45	1.15	0.45	1.5	5.05	0.45	1000	0.389485	0.958075	-0.0569943	0.0001	5.18149	0.824267
	0.45	1.15	0.45	1.5	5.05	0.8	1000	0.394937	0.975368	-0.0113138	0.0001	5.17952	1.25717
	0.45	1.15	0.45	1.5	5.05	1.15	1000	0.347925	0.96077	-0.0299206	0.0001	5.18257	1.58903
	0.45	1.15	0.45	1.5	5.05	1.5	1000	0.347767	0.960455	-0.0307717	0.0001	5.18066	1.95654
	0.45	1.15	0.45	1.5	7.525	0.45	1000	0.34925	0.966494	-0.0135744	0.0001	7.61341	0.698319
	0.45	1.15	0.45	1.5	7.525	0.8	1000	0.335588	0.960507	-0.0229116	0.0001	7.6156	1.08863
	0.45	1.15	0.45	1.5	7.525	1.15	1000	0.317779	0.949289	-0.0455952	0.0001	7.61595	1.4727
	0.45	1.15	0.45	1.5	7.525	1.5	1000	0.348911	0.962728	-0.0246435	0.0001	7.61261	1.87894
	0.45	1.15	0.45	1.5	10	0.45	1000	0.294039	0.909611	-0.138766	0.0001	10.0699	0.317729
	0.45	1.15	0.45	1.5	10	0.8	1000	0.34507	0.96984	-0.000469905	0.0001	10.0671	1.04858
	0.45	1.15	0.45	1.5	10	1.15	1000	0.32579	0.954943	-0.0332133	0.0001	10.0677	1.41906
	0.45	1.15	0.45	1.5	10	1.5	1000	0.347691	0.960302	-0.0311823	0.0001	10.0659	1.81048
	0.45	1.15	0.8	0.45	2.575	0.45	1000	0.390155	0.783105	-0.12519	0.0001	3.2389	0.0001
	0.45	1.15	0.8	0.45	2.575	0.8	1000	0.37436	0.811584	-0.0387811	0.0001	3.03631	0.0187202
	0.45	1.15	0.8	0.45	2.575	1.15	1000	0.413009	0.802681	-0.0961443	0.0001	2.92112	0.0001
	0.45	1.15	0.8	0.45	2.575	1.5	1000	0.402927	0.781123	-0.141375	0.0001	2.84582	0.656255
	0.45	1.15	0.8	0.45	5.05	0.45	1000	0.281834	0.795249	-0.0197725	0.0001	4.98022	0.305807
	0.45	1.15	0.8	0.45	5.05	0.8	1000	0.289831	0.79863	-0.00664305	0.0610897	5.1152	0.340914
	0.45	1.15	0.8	0.45	5.05	1.15	1000	0.30372	0.740167	-0.175904	0.188626	5.13824	0.0727573
	0.45	1.15	0.8	0.45	5.05	1.5	1000	0.380946	0.747772	-0.206745	0.0001	5.16393	0.254297
	0.45	1.15	0.8	0.45	7.525	0.45	1000	0.404857	0.768747	-0.179509	0.152462	7.5599	0.126469
	0.45	1.15	0.8	0.45	7.525	0.8	1000	0.335136	0.8707	-0.00606787	0.115805	7.61581	0.326296
	0.45	1.15	0.8	0.45	7.525	1.15	1000	0.388972	0.823958	-0.0157679	0.00130756	7.55611	0.000538033
	0.45	1.15	0.8	0.45	7.525	1.5	1000	0.369542	0.763007	-0.156442	0.0001	7.58195	0.224068
	0.45	1.15	0.8	0.45	10	0.45	1000	0.413656	0.790532	-0.131454	0.326569	10.0189	0.183982
	0.45	1.15	0.8	0.45	10	0.8	1000	0.359316	0.695142	-0.332298	0.303188	10.0184	0.00385464
	0.45	1.15	0.8	0.45	10	1.15	1000	0.375941	0.778222	-0.121819	0.8001	9.99292	0.325665
	0.45	1.15	0.8	0.45	10	1.5	1000	0.347427	0.731884	-0.220713	0.0001	10.0322	0.20084
	0.45	1.15	0.8	0.8	2.575	0.45	1000	0.352817	0.726464	-0.240367	0.0001	3.21793	0.0001
	0.45	1.15	0.8	0.8	2.575	0.8	1000	0.352803	0.808212	-0.0394618	0.0001	2.99776	0.0833685
	0.45	1.15	0.8	0.8	2.575	1.15	1000	0.405036	0.785161	-0.13309	0.0001	2.9183	0.394873
	0.45	1.15	0.8	0.8	2.575	1.5	1000	0.39662	0.769692	-0.164697	0.0001	2.86532	0.995334
	0.45	1.15	0.8	0.8	5.05	0.45	1000	0.283558	0.776262	-0.0563396	0.029653	5.1611	0.411058
	0.45	1.15	0.8	0.8	5.05	0.8	1000	0.355353	0.794527	-0.0661238	0.192661	5.15641	0.0655532
	0.45	1.15	0.8	0.8	5.05	1.15	1000	0.399955	0.784255	-0.129331	0.0001	5.19587	0.0001
	0.45	1.15	0.8	0.8	5.05	1.5	1000	0.378583	0.741228	-0.221841	0.0001	5.18738	0.628092
	0.45	1.15	0.8	0.8	7.525	0.45	1000	0.226934	0.745908	-0.119418	0.4001	7.38484	0.318437
	0.45	1.15	0.8	0.8	7.525	0.8	1000	0.280119	0.765928	-0.093817	0.4001	7.54929	0.144241
	0.45	1.15	0.8	0.8	7.525	1.15	1000	0.397973	0.810969	-0.0554187	0.0001	7.59856	0.0001
	0.45	1.15	0.8	0.8	7.525	1.5	1000	0.354816	0.710461	-0.281943	0.0001	7.60885	0.403875
	0.45	1.15	0.8	0.8	10	0.45	1000	0.393577	0.745001	-0.230941	0.186028	10.0351	0.159932
	0.45	1.15	0.8	0.8	10	0.8	1000	0.408879	0.834341	-0.0047577	0.8001	10.0067	0.203175
	0.45	1.15	0.8	0.8	10	1.15	1000	0.386619	0.789045	-0.102618	0.0001	10.0372	0.0776446
	0.45	1.15	0.8	0.8	10	1.5	1000	0.326185	0.680059	-0.339377	0.0001	10.0547	0.269657
	0.45	1.15	0.8	1.15	2.575	0.45	1000	0.309516	0.809587	-0.00536011	0.0001	3.02264	0.2001
	0.45	1.15	0.8	1.15	2.575	0.8	1000	0.386851	0.76821	-0.158185	0.0001	2.96519	0.230039
	0.45	1.15	0.8	1.15	2.575	1.15	1000	0.38512	0.750921	-0.202537	0.0001	2.92366	0.815653
	0.45	1.15	0.8	1.15	2.575	1.5	1000	0.382753	0.747338	-0.209693	0.0001	2.88873	1.36301
	0.45	1.15	0.8	1.15	5.05	0.45	1000	0.363391	0.812257	-0.0221279	0.23008	5.16324	0.107216
	0.45	1.15	0.8	1.15	5.05	0.8	1000	0.404854	0.827427	-0.0187285	0.0001	5.21167	0.0001
	0.45	1.15	0.8	1.15	5.05	1.15	1000	0.390052	0.758679	-0.186969	0.0001	5.21846	0.486667
	0.45	1.15	0.8	1.15	5.05	1.5	1000	0.378453	0.741042	-0.222211	0.0001	5.20735	1.07879
	0.45	1.15	0.8	1.15	7.525	0.45	1000	0.303157	0.795733	-0.0264942	0.4001	7.57565	0.350024
	0.45	1.15	0.8	1.15	7.525	0.8	1000	0.386535	0.822844	-0.0222601	0.0105742	7.61368	0.00380922
	0.45	1.15	0.8	1.15	7.525	1.15	1000	0.387432	0.754507	-0.195353	0.0001	7.63	0.323512
	0.45	1.15	0.8	1.15	7.525	1.5	1000	0.367612	0.726251	-0.251331	0.0001	7.62836	0.899903
	0.45	1.15	0.8	1.15	10	0.45	1000	0.379245	0.731091	-0.25156	0.102298	10.0521	0.315993
	0.45	1.15	0.8	1.15	10	0.8	1000	0.404139	0.817431	-0.0448065	0.0001	10.0547	0.0001
	0.45	1.15	0.8	1.15	10	1.15	1000	0.383203	0.750006	-0.203036	0.0001	10.0716	0.248067
	0.45	1.15	0.8	1.15	10	1.5	1000	0.3536	0.709042	-0.28467	0.0001	10.0745	0.773998
	0.45	1.15	0.8	1.5	2.575	0.45	1000	0.335838	0.808063	-0.027448	0.0001	2.92065	0.45464
	0.45	1.15	0.8	1.5	2.575	0.8	1000	0.349162	0.805372	-0.0369047	0.0001	2.9028	0.957265
	0.45	1.15	0.8	1.5	2.575	1.15	1000	0.305264	0.661045	-0.37418	0.0001	2.93927	1.20908
	0.45	1.15	0.8	1.5	2.575	1.5	1000	0.329091	0.682889	-0.334121	0.0001	2.91758	1.71121
	0.45	1.15	0.8	1.5	5.05	0.45	1000	0.377069	0.821725	-0.00986114	0.0001	5.21775	0.0242671
	0.45	1.15	0.8	1.5	5.05	0.8	1000	0.349419	0.704259	-0.293828	0.0001	5.24359	0.302562
	0.45	1.15	0.8	1.5	5.05	1.15	1000	0.356603	0.71257	-0.277884	0.0001	5.23596	0.954884
	0.45	1.15	0.8	1.5	5.05	1.5	1000	0.356233	0.712132	-0.278728	0.0001	5.22608	1.4906
	0.45	1.15	0.8	1.5	7.525	0.45	1000	0.388415	0.821565	-0.0184944	0.0001	7.61767	0.0001
	0.45	1.15	0.8	1.5	7.525	0.8	1000	0.373238	0.747497	-0.200287	0.0001	7.64396	0.241917
	0.45	1.15	0.8	1.5	7.525	1.15	1000	0.367361	0.725924	-0.251969	0.0001	7.64779	0.813849
	0.45	1.15	0.8	1.5	7.525	1.5	1000	0.358876	0.715297	-0.272622	0.0001	7.64417	1.34219
	0.45	1.15	0.8	1.5	10	0.45	1000	0.34034	0.684176	-0.340827	0.0308106	10.0712	0.424683
	0.45	1.15	0.8	1.5	10	0.8	1000	0.38154	0.7632	-0.166348	0.0001	10.0825	0.233018
	0.45	1.15	0.8	1.5	10	1.15	1000	0.370426	0.729952	-0.244082	0.0001	10.0896	0.730186
	0.45	1.15	0.8	1.5	10	1.5	1000	0.356055	0.711921	-0.279135	0.0001	10.0892	1.23968
	0.45	1.15	1.15	0.45	2.575	0.45	1000	0.426669	0.455262	-0.618047	0.0001	5.07556	0.0197754
	0.45	1.15	1.15	0.45	2.575	0.8	1000	0.36495	0.707593	-0.00634648	0.0001	3.91342	0.261253
	0.45	1.15	1.15	0.45	2.575	1.15	15.9899	0.168058	0.160182	0.65549	0.767566	26.7717	0.395501
	0.45	1.15	1.15	0.45	2.575	1.5	1000	0.281137	0.872329	-0.00464995	0.0001	3.40066	0.271004
	0.45	1.15	1.15	0.45	5.05	0.45	1000	0.177849	0.556799	-0.0638709	0.0001	4.92204	0.048472
	0.45	1.15	1.15	0.45	5.05	0.8	1000	0.143607	0.553471	-0.0478845	0.0001	4.93488	0.0548514
	0.45	1.15	1.15	0.45	5.05	1.15	1000	0.174909	0.547381	-0.0710557	0.0001	4.98589	0.0458601
	0.45	1.15	1.15	0.45	5.05	1.5	1000	0.314697	0.612292	-0.0323106	0.0001	5.15557	0.528218
	0.45	1.15	1.15	0.45	7.525	0.45	1000	0.433459	0.623038	-0.207844	0.177005	7.58873	0.255799
	0.45	1.15	1.15	0.45	7.525	0.8	1000	0.424661	0.457687	-0.602891	0.110404	7.57972	0.146759
	0.45	1.15	1.15	0.45	7.525	1.15	1000	0.256023	0.611899	-0.0120839	0.4001	7.42389	0.342881
	0.45	1.15	1.15	0.45	7.525	1.5	1000	0.296738	0.546178	-0.188159	0.183564	7.33831	0.579531
	0.45	1.15	1.15	0.45	10	0.45	1000	0.423907	0.311807	-1.01563	0.328844	10.0662	0.248464
	0.45	1.15	1.15	0.45	10	0.8	1000	0.425421	0.456477	-0.61087	0.29211	10.0376	0.158225
	0.45	1.15	1.15	0.45	10	1.15	1000	0.297757	0.612397	-0.0453257	0.4001	9.77042	0.445381
	0.45	1.15	1.15	0.45	10	1.5	1000	0.374901	0.648332	-0.00414857	0.8001	9.99939	0.0001
	0.45	1.15	1.15	0.8	2.575	0.45	1000	0.426935	0.535606	-0.393817	0.0001	4.46902	0.0001
	0.45	1.15	1.15	0.8	2.575	0.8	1000	0.0909424	0.988645	-0.139483	0.0001	6.61353	0.281978
	0.45	1.15	1.15	0.8	2.575	1.15	1000	-0.0346251	1.11791	-0.225277	0.0001	5.8179	0.329103
	0.45	1.15	1.15	0.8	2.575	1.5	1000	0.219361	0.628404	-0.0416041	0.0001	3.22183	0.4001
	0.45	1.15	1.15	0.8	5.05	0.45	1000	0.202438	0.548794	-0.0750435	0.0001	5.01057	0.0367969
	0.45	1.15	1.15	0.8	5.05	0.8	1000	0.290363	0.575846	-0.0723965	0.0001	4.90011	0.42502
	0.45	1.15	1.15	0.8	5.05	1.15	1000	0.119427	0.539818	-0.0767393	0.0001	4.97917	0.0237069
	0.45	1.15	1.15	0.8	5.05	1.5	1000	0.209673	0.609142	-0.0167159	0.2001	5.11416	0.32347
	0.45	1.15	1.15	0.8	7.525	0.45	1000	0.158237	0.57621	-0.0385903	0.4001	7.25265	0.321816
	0.45	1.15	1.15	0.8	7.525	0.8	1000	0.407272	0.455212	-0.53433	0.175932	7.1197	0.915879
	0.45	1.15	1.15	0.8	7.525	1.15	1000	0.221378	0.588698	-0.0377973	0.4001	7.43419	0.339603
	0.45	1.15	1.15	0.8	7.525	1.5	1000	0.200813	0.580016	-0.0424849	0.195391	7.61288	0.424326
	0.45	1.15	1.15	0.8	10	0.45	1000	0.428522	0.477581	-0.576878	0.239035	10.0493	0.294503
	0.45	1.15	1.15	0.8	10	0.8	1000	0.412963	0.379668	-0.761089	0.137169	8.98061	0.376508
	0.45	1.15	1.15	0.8	10	1.15	1000	0.418664	0.643876	-0.0944744	0.698613	8.76916	0.595359
	0.45	1.15	1.15	0.8	10	1.5	1000	0.330891	0.572713	-0.14549	0.8001	10.0249	0.0001
	0.45	1.15	1.15	1.15	2.575	0.45	1000	0.420958	0.604076	-0.187855	0.0001	3.8475	0.0001
	0.45	1.15	1.15	1.15	2.575	0.8	1000	0.0189585	0.833441	-0.0283371	0.0001	5.93264	0.329394
	0.45	1.15	1.15	1.15	2.575	1.15	1000	0.285327	0.630535	-0.0309385	0.0001	3.22445	0.4001
	0.45	1.15	1.15	1.15	2.575	1.5	1000	0.42996	0.555259	-0.359439	0.0001	3.22134	0.0001
	0.45	1.15	1.15	1.15	5.05	0.45	1000	0.231412	0.574449	-0.0504492	0.0303635	4.93802	0.342735
	0.45	1.15	1.15	1.15	5.05	0.8	1000	0.305902	0.611155	-0.012679	0.234542	5.11661	0.03635
	0.45	1.15	1.15	1.15	5.05	1.15	1000	0.243135	0.595789	-0.039125	0.00249723	5.19842	0.420368
	0.45	1.15	1.15	1.15	5.05	1.5	1000	0.347342	0.651262	-0.0482869	0.148284	5.29488	0.0690387
	0.45	1.15	1.15	1.15	7.525	0.45	1000	0.426183	0.454026	-0.618947	0.034841	7.6213	0.399925
	0.45	1.15	1.15	1.15	7.525	0.8	1000	0.214694	0.596317	-0.0281439	0.4001	7.44923	0.344137
	0.45	1.15	1.15	1.15	7.525	1.15	1000	0.206733	0.52488	-0.15636	0.222752	7.62959	0.567683
	0.45	1.15	1.15	1.15	7.525	1.5	1000	0.244572	0.607153	-0.0645337	0.4001	7.65076	0.138327
	0.45	1.15	1.15	1.15	10	0.45	1000	0.426715	0.453393	-0.625554	0.165226	10.0634	0.383539
	0.45	1.15	1.15	1.15	10	0.8	1000	0.41001	0.61729	-0.133776	0.170079	9.55004	0.50285
	0.45	1.15	1.15	1.15	10	1.15	1000	0.377121	0.652652	-0.00149158	0.8001	10.0422	0.0001
	0.45	1.15	1.15	1.15	10	1.5	1000	0.27762	0.615022	-0.0493742	0.4001	10.0819	0.0001
	0.45	1.15	1.15	1.5	2.575	0.45	1000	0.391029	0.654126	-0.0121306	0.0001	3.29875	0.0001
	0.45	1.15	1.15	1.5	2.575	0.8	1000	0.362651	0.651604	-0.0211461	0.0001	3.18659	0.0001
	0.45	1.15	1.15	1.5	2.575	1.15	1000	0.423901	0.54328	-0.357549	0.0001	3.20944	0.0001
	0.45	1.15	1.15	1.5	2.575	1.5	1000	0.42133	0.438657	-0.624861	0.0001	3.21552	0.535046
	0.45	1.15	1.15	1.5	5.05	0.45	1000	0.304309	0.609141	-0.0130088	0.248225	5.13792	0.0429876
	0.45	1.15	1.15	1.5	5.05	0.8	1000	0.212298	0.598962	-0.0113194	0.0725176	5.2271	0.35358
	0.45	1.15	1.15	1.5	5.05	1.15	1000	0.366092	0.669957	-0.00148498	0.126124	5.30974	0.0591147
	0.45	1.15	1.15	1.5	5.05	1.5	1000	0.426134	0.502268	-0.478592	0.0001	5.37137	0.0001
	0.45	1.15	1.15	1.5	7.525	0.45	1000	0.244262	0.598672	-0.0242589	0.4001	7.48212	0.346385
	0.45	1.15	1.15	1.5	7.525	0.8	1000	0.351643	0.601388	-0.101788	0.0001	7.40833	0.547111
	0.45	1.15	1.15	1.5	7.525	1.15	1000	0.281333	0.618682	-0.0460037	0.4001	7.66422	0.137578
	0.45	1.15	1.15	1.5	7.525	1.5	1000	0.429992	0.600896	-0.232601	0.0001	7.72309	0.0001
	0.45	1.15	1.15	1.5	10	0.45	1000	0.424101	0.454886	-0.603638	0.120317	10.0822	0.475463
	0.45	1.15	1.15	1.5	10	0.8	1000	0.331599	0.612725	-0.0511603	0.131227	10.3602	0.135653
	0.45	1.15	1.15	1.5	10	1.15	1000	0.31288	0.637518	-0.0137456	0.4001	10.0954	0.0001
	0.45	1.15	1.15	1.5	10	1.5	1000	0.431418	0.644016	-0.123454	0.0001	10.1399	0.0001
	0.45	1.15	1.5	0.45	2.575	0.45	15.9899	0.168059	0.160181	0.655495	0.767589	26.7731	0.395508
	0.45	1.15	1.5	0.45	2.575	0.8	1000	0.367969	0.527945	-0.139204	0.0001	5.54245	0.279903
	0.45	1.15	1.5	0.45	2.575	1.15	1000	0.375872	0.619468	-0.161569	0.0001	5.26796	0.294783
	0.45	1.15	1.5	0.45	2.575	1.5	15.9899	0.168058	0.160176	0.655506	0.76758	26.7725	0.395505
	0.45	1.15	1.5	0.45	5.05	0.45	1000	0.160004	0.390566	-0.183221	0.0129299	4.9666	0.4001
	0.45	1.15	1.5	0.45	5.05	0.8	1000	0.375907	0.223358	-0.823961	0.119458	5.08481	0.280512
	0.45	1.15	1.5	0.45	5.05	1.15	1000	0.368246	0.0114551	-1.30854	0.110867	5.0606	0.294178
	0.45	1.15	1.5	0.45	5.05	1.5	15.9899	0.168049	0.160188	0.655479	0.767603	26.7739	0.395503
	0.45	1.15	1.5	0.45	7.525	0.45	1000	0.381226	0.370532	-0.48194	0.199947	7.69155	0.284039
	0.45	1.15	1.5	0.45	7.525	0.8	1000	0.38434	0.369357	-0.470846	0.159952	7.62529	0.214983
	0.45	1.15	1.5	0.45	7.525	1.15	1000	0.395437	0.400165	-0.353434	0.544917	7.52643	0.388648
	0.45	1.15	1.5	0.45	7.525	1.5	1000	0.392079	0.212382	-0.740131	0.31148	7.4642	0.336677
	0.45	1.15	1.5	0.45	10	0.45	1000	0.396088	0.544626	-0.0412675	0.335699	10.0998	0.305658
	0.45	1.15	1.5	0.45	10	0.8	1000	0.397821	0.533604	-0.0577157	0.311145	10.0669	0.242434
	0.45	1.15	1.5	0.45	10	1.15	1000	0.379217	0.216955	-0.811589	0.303069	10.0447	0.0140492
	0.45	1.15	1.5	0.45	10	1.5	1000	0.40471	0.43252	-0.218501	0.293562	9.93577	0.388204
	0.45	1.15	1.5	0.8	2.575	0.45	1000	-0.112095	1.10247	-0.126273	0.268148	5.45743	0.498966
	0.45	1.15	1.5	0.8	2.575	0.8	1000	0.365637	0.517607	-0.388984	0.0001	5.70183	0.290918
	0.45	1.15	1.5	0.8	2.575	1.15	1000	0.320308	0.0649436	-0.767995	0.0001	3.11257	0.416788
	0.45	1.15	1.5	0.8	2.575	1.5	1000	0.0863118	0.698424	-0.018372	0.0001	3.52548	0.293424
	0.45	1.15	1.5	0.8	5.05	0.45	1000	0.376606	0.249436	-0.764767	0.133798	5.10976	0.283883
	0.45	1.15	1.5	0.8	5.05	0.8	1000	0.371711	0.108579	-1.08776	0.217921	5.11124	0.292139
	0.45	1.15	1.5	0.8	5.05	1.15	1000	0.231986	0.390675	-0.0352296	0.0856833	5.13075	0.453548
	0.45	1.15	1.5	0.8	5.05	1.5	15.9899	0.168055	0.160183	0.65549	0.767618	26.7751	0.395507
	0.45	1.15	1.5	0.8	7.525	0.45	1000	0.293412	0.329805	-0.306377	0.164038	6.1253	0.755675
	0.45	1.15	1.5	0.8	7.525	0.8	1000	0.367051	7.77417e-05	-1.33812	0.164337	7.38375	0.65606
	0.45	1.15	1.5	0.8	7.525	1.15	1000	0.38831	0.210971	-0.778696	0.290154	7.50314	0.327462
	0.45	1.15	1.5	0.8	7.525	1.5	1000	0.393876	0.217349	-0.692149	0.337349	7.43126	0.357816
	0.45	1.15	1.5	0.8	10	0.45	1000	0.371401	0.250549	-0.783888	0.282468	10.0951	0.323146
	0.45	1.15	1.5	0.8	10	0.8	1000	0.170081	0.483802	-1.15103e-06	0.259409	8.09493	0.4001
	0.45	1.15	1.5	0.8	10	1.15	1000	0.392478	0.238186	-0.669806	0.337148	9.47808	0.599958
	0.45	1.15	1.5	0.8	10	1.5	1000	0.400056	0.312372	-0.461525	0.310989	9.90796	0.414291
	0.45	1.15	1.5	1.15	2.575	0.45	1000	0.498153	2.00032	-0.485176	0.0532053	4.91238	0.271
	0.45	1.15	1.5	1.15	2.575	0.8	1000	0.325736	0.349072	-0.156122	0.0001	3.68554	0.441383
	0.45	1.15	1.5	1.15	2.575	1.15	1000	-0.791419	-0.150084	-0.231489	0.0001	4.53766	0.305614
	0.45	1.15	1.5	1.15	2.575	1.5	1000	-0.0984462	0.0284549	-0.356789	0.0001	2.05414	0.296844
	0.45	1.15	1.5	1.15	5.05	0.45	15.9899	0.168052	0.160186	0.655479	0.767601	26.7739	0.395502
	0.45	1.15	1.5	1.15	5.05	0.8	1000	0.40387	0.486496	-0.126564	0.0995767	5.1388	0.279614
	0.45	1.15	1.5	1.15	5.05	1.15	15.9899	0.168058	0.160182	0.65549	0.767569	26.7719	0.395502
	0.45	1.15	1.5	1.15	5.05	1.5	15.9899	0.168056	0.16018	0.655496	0.767572	26.7721	0.395502
	0.45	1.15	1.5	1.15	7.525	0.45	1000	0.357942	0.0607806	-1.25263	0.106709	7.70017	0.377545
	0.45	1.15	1.5	1.15	7.525	0.8	1000	0.386795	0.210728	-0.79027	0.283534	7.52589	0.325976
	0.45	1.15	1.5	1.15	7.525	1.15	1000	0.392799	0.213286	-0.721757	0.31176	7.45465	0.350604
	0.45	1.15	1.5	1.15	7.525	1.5	1000	0.390567	0.214904	-0.663023	0.393937	7.2519	0.382788
	0.45	1.15	1.5	1.15	10	0.45	1000	0.359367	0.087084	-1.1896	0.232574	10.1108	0.379294
	0.45	1.15	1.5	1.15	10	0.8	1000	0.392826	0.372463	-0.422996	0.233629	7.7956	0.0001
	0.45	1.15	1.5	1.15	10	1.15	1000	0.405391	0.411463	-0.244966	0.317008	9.93794	0.395153
	0.45	1.15	1.5	1.15	10	1.5	1000	0.399831	0.374096	-0.276831	0.306889	9.83356	0.454822
	0.45	1.15	1.5	1.5	2.575	0.45	1000	0.248981	0.336864	-0.152014	0.0001	4.32117	0.8001
	0.45	1.15	1.5	1.5	2.575	0.8	1000	0.26474	0.277583	-0.203736	0.0001	3.18216	0.428474
	0.45	1.15	1.5	1.5	2.575	1.15	1000	0.127657	0.273332	-0.0786404	0.0001	2.50803	0.304253
	0.45	1.15	1.5	1.5	2.575	1.5	1000	0.319001	0.439521	-0.030985	0.0001	3.54577	0.8001
	0.45	1.15	1.5	1.5	5.05	0.45	1000	0.404116	0.486517	-0.125185	0.110386	5.17557	0.27711
	0.45	1.15	1.5	1.5	5.05	0.8	1000	0.115732	0.699943	-0.0229692	0.0396475	5.2004	0.481438
	0.45	1.15	1.5	1.5	5.05	1.15	15.9899	0.168065	0.160176	0.655505	0.76758	26.7726	0.395502
	0.45	1.15	1.5	1.5	5.05	1.5	1000	0.260256	0.35956	-0.0817395	0.0001	4.86784	0.46432
	0.45	1.15	1.5	1.5	7.525	0.45	1000	0.387056	0.211052	-0.787934	0.286953	7.54905	0.326455
	0.45	1.15	1.5	1.5	7.525	0.8	1000	0.392557	0.210108	-0.73661	0.299817	7.50111	0.343053
	0.45	1.15	1.5	1.5	7.525	1.15	1000	0.392323	0.226268	-0.646271	0.569122	7.356	0.398557
	0.45	1.15	1.5	1.5	7.525	1.5	1000	0.360468	0.152806	-0.694982	0.328648	6.98213	0.659355
	0.45	1.15	1.5	1.5	10	0.45	1000	0.35445	-0.00546425	-1.4104	0.206354	10.1422	0.424851
	0.45	1.15	1.5	1.5	10	0.8	1000	0.407368	0.458475	-0.145786	0.317106	9.97259	0.378498
	0.45	1.15	1.5	1.5	10	1.15	1000	0.405058	0.446125	-0.123913	0.3109	9.88424	0.429298
	0.45	1.15	1.5	1.5	10	1.5	1000	0.36576	0.146839	-0.725297	0.277942	9.47212	0.593717
	0.45	1.5	0.45	0.45	2.575	0.45	1000	0.402601	1.35463	-0.0462756	0.0001	2.87892	0.0001
	0.45	1.5	0.45	0.45	2.575	0.8	1000	0.378206	1.30046	-0.227498	0.0001	2.86216	0.0178171
	0.45	1.5	0.45	0.45	2.575	1.15	1000	0.386023	1.34018	-0.0893902	0.0001	2.75364	0.713004
	0.45	1.5	0.45	0.45	2.575	1.5	1000	0.364845	1.32112	-0.147218	0.0001	2.72815	1.15017
	0.45	1.5	0.45	0.45	5.05	0.45	1000	0.356262	1.34965	-0.0420953	0.0811112	5.02901	0.271159
	0.45	1.5	0.45	0.45	5.05	0.8	1000	0.389463	1.34675	-0.0676425	0.0001	5.11593	0.0001
	0.45	1.5	0.45	0.45	5.05	1.15	1000	0.383785	1.35558	-0.0337146	0.0001	5.11435	0.548479
	0.45	1.5	0.45	0.45	5.05	1.5	1000	0.37144	1.3487	-0.0535193	0.0001	5.1083	1.05205
	0.45	1.5	0.45	0.45	7.525	0.45	1000	0.409239	1.36283	-0.0205565	0.150795	7.55195	0.00787446
	0.45	1.5	0.45	0.45	7.525	0.8	1000	0.391149	1.34312	-0.0819711	0.103407	7.55451	0.110946
	0.45	1.5	0.45	0.45	7.525	1.15	1000	0.343527	1.31562	-0.157901	0.0001	7.55625	0.362119
	0.45	1.5	0.45	0.45	7.525	1.5	1000	0.386628	1.35875	-0.0260231	0.0001	7.5586	1.00831
	0.45	1.5	0.45	0.45	10	0.45	1000	0.413797	1.36875	-0.00183377	0.353532	10.0115	0.0107416
	0.45	1.5	0.45	0.45	10	0.8	1000	0.38601	1.32702	-0.137258	0.315436	10.0135	0.0274022
	0.45	1.5	0.45	0.45	10	1.15	1000	0.390512	1.36356	-0.0104351	0.1001	10.0205	0.547195
	0.45	1.5	0.45	0.45	10	1.5	1000	0.420565	1.36864	-0.00629336	0.0001	10.0236	1.0042
	0.45	1.5	0.45	0.8	2.575	0.45	1000	0.373697	1.31975	-0.156215	0.0001	2.90319	0.0001
	0.45	1.5	0.45	0.8	2.575	0.8	1000	0.389111	1.35406	-0.0414176	0.0001	2.80126	0.580636
	0.45	1.5	0.45	0.8	2.575	1.15	1000	0.369406	1.32496	-0.13566	0.0001	2.78896	0.969372
	0.45	1.5	0.45	0.8	2.575	1.5	1000	0.350975	1.3102	-0.179752	0.0001	2.77092	1.39206
	0.45	1.5	0.45	0.8	5.05	0.45	1000	0.39482	1.35881	-0.0272441	0.0001	5.1329	0.0001
	0.45	1.5	0.45	0.8	5.05	0.8	1000	0.360308	1.29979	-0.220867	0.0001	5.15876	0.0659351
	0.45	1.5	0.45	0.8	5.05	1.15	1000	0.355909	1.31509	-0.164627	0.0001	5.15021	0.706061
	0.45	1.5	0.45	0.8	5.05	1.5	1000	0.369427	1.34679	-0.0594679	0.0001	5.13487	1.29679
	0.45	1.5	0.45	0.8	7.525	0.45	1000	0.397012	1.36488	-0.00664808	0.4001	7.5518	0.308114
	0.45	1.5	0.45	0.8	7.525	0.8	1000	0.38363	1.35014	-0.0528193	0.0001	7.57246	0.352082
	0.45	1.5	0.45	0.8	7.525	1.15	1000	0.350938	1.32072	-0.142906	0.0001	7.58327	0.616577
	0.45	1.5	0.45	0.8	7.525	1.5	1000	0.37973	1.35305	-0.0433098	0.0001	7.57805	1.20581
	0.45	1.5	0.45	0.8	10	0.45	1000	0.401962	1.35301	-0.0518957	0.180196	10.0319	0.116787
	0.45	1.5	0.45	0.8	10	0.8	1000	0.35956	1.31683	-0.160059	0.380485	10.0223	0.430013
	0.45	1.5	0.45	0.8	10	1.15	1000	0.36759	1.3453	-0.0641095	0.0001	10.0372	0.677645
	0.45	1.5	0.45	0.8	10	1.5	1000	0.419459	1.36371	-0.0234306	0.0001	10.0377	1.16607
	0.45	1.5	0.45	1.15	2.575	0.45	1000	0.383913	1.36193	-0.0124356	0.0001	2.82056	0.544742
	0.45	1.5	0.45	1.15	2.575	0.8	1000	0.375204	1.35238	-0.0420098	0.0001	2.81258	0.943863
	0.45	1.5	0.45	1.15	2.575	1.15	1000	0.378182	1.35539	-0.0325383	0.0001	2.79919	1.37534
	0.45	1.5	0.45	1.15	2.575	1.5	1000	0.37504	1.35221	-0.0425216	0.0001	2.79126	1.76241
	0.45	1.5	0.45	1.15	5.05	0.45	1000	0.383851	1.35855	-0.0233522	0.0001	5.16446	0.299467
	0.45	1.5	0.45	1.15	5.05	0.8	1000	0.363831	1.3306	-0.113369	0.0001	5.17367	0.643644
	0.45	1.5	0.45	1.15	5.05	1.15	1000	0.384638	1.36227	-0.0108217	0.0001	5.16202	1.23429
	0.45	1.5	0.45	1.15	5.05	1.5	1000	0.36925	1.34663	-0.0599844	0.0001	5.16033	1.60645
	0.45	1.5	0.45	1.15	7.525	0.45	1000	0.356533	1.34667	-0.0533771	0.2001	7.58435	0.365354
	0.45	1.5	0.45	1.15	7.525	0.8	1000	0.371104	1.33913	-0.0863479	0.0001	7.60027	0.600329
	0.45	1.5	0.45	1.15	7.525	1.15	1000	0.381223	1.35857	-0.0225172	0.0001	7.59888	1.12473
	0.45	1.5	0.45	1.15	7.525	1.5	1000	0.390734	1.36627	-0.000605803	0.0001	7.59528	1.55615
	0.45	1.5	0.45	1.15	10	0.45	1000	0.386602	1.33853	-0.0958777	0.0612639	10.0519	0.195781
	0.45	1.5	0.45	1.15	10	0.8	1000	0.357518	1.31959	-0.149452	0.0001	10.0519	0.53131
	0.45	1.5	0.45	1.15	10	1.15	1000	0.374921	1.3521	-0.0428924	0.0001	10.0545	1.03002
	0.45	1.5	0.45	1.15	10	1.5	1000	0.378647	1.35186	-0.0471136	0.0001	10.0533	1.43996
	0.45	1.5	0.45	1.5	2.575	0.45	1000	0.412783	1.33391	-0.126926	0.3	2.78246	0.773734
	0.45	1.5	0.45	1.5	2.575	0.8	1000	0.418544	1.35962	-0.0376172	0.3	2.77938	1.20725
	0.45	1.5	0.45	1.5	2.575	1.15	1000	0.416327	1.34973	-0.0719806	0.0001	2.82764	1.70862
	0.45	1.5	0.45	1.5	2.575	1.5	1000	0.419932	1.36582	-0.0160972	0.0001	2.82528	2.07562
	0.45	1.5	0.45	1.5	5.05	0.45	1000	0.42094	1.37031	-0.000476819	0.0001	5.18149	0.824267
	0.45	1.5	0.45	1.5	5.05	0.8	1000	0.399209	1.36493	-0.00988861	0.0001	5.18358	1.19657
	0.45	1.5	0.45	1.5	5.05	1.15	1000	0.381309	1.35481	-0.0376469	0.0001	5.18498	1.56047
	0.45	1.5	0.45	1.5	5.05	1.5	1000	0.380984	1.35445	-0.0388249	0.0001	5.18273	1.93534
	0.45	1.5	0.45	1.5	7.525	0.45	1000	0.368317	1.34598	-0.0627842	0.0001	7.61402	0.598319
	0.45	1.5	0.45	1.5	7.525	0.8	1000	0.355621	1.33471	-0.0967992	0.0001	7.61935	0.9769
	0.45	1.5	0.45	1.5	7.525	1.15	1000	0.390524	1.36599	-0.00149602	0.0001	7.61477	1.49725
	0.45	1.5	0.45	1.5	7.525	1.5	1000	0.383296	1.35709	-0.0303072	0.0001	7.61394	1.85632
	0.45	1.5	0.45	1.5	10	0.45	1000	0.370257	1.33355	-0.106429	0.0001	10.0699	0.31948
	0.45	1.5	0.45	1.5	10	0.8	1000	0.366213	1.34383	-0.0686873	0.0001	10.0691	0.945826
	0.45	1.5	0.45	1.5	10	1.15	1000	0.358109	1.33677	-0.0904943	0.0001	10.0699	1.35044
	0.45	1.5	0.45	1.5	10	1.5	1000	0.380827	1.35427	-0.0393927	0.0001	10.0669	1.78438
	0.45	1.5	0.8	0.45	2.575	0.45	1000	0.429989	1.20097	-0.21313	0.0001	3.46153	0.0546541
	0.45	1.5	0.8	0.45	2.575	0.8	1000	0.411061	1.18655	-0.248177	0.0001	3.27035	0.0001
	0.45	1.5	0.8	0.45	2.575	1.15	1000	0.408375	1.24955	-0.0376296	0.0001	2.98089	0.076759
	0.45	1.5	0.8	0.45	2.575	1.5	1000	0.437959	1.23109	-0.116345	0.0001	2.89401	0.453997
	0.45	1.5	0.8	0.45	5.05	0.45	1000	0.37218	1.25049	-0.00433954	0.0150891	4.94804	0.348143
	0.45	1.5	0.8	0.45	5.05	0.8	1000	0.365495	1.24459	-0.0215912	0.0189083	4.97895	0.342769
	0.45	1.5	0.8	0.45	5.05	1.15	1000	0.328891	1.21845	-0.0947763	0.181975	5.09654	0.303092
	0.45	1.5	0.8	0.45	5.05	1.5	1000	0.433426	1.2616	-0.00647064	0.0001	5.16393	0.254297
	0.45	1.5	0.8	0.45	7.525	0.45	1000	0.440671	1.23257	-0.11514	0.166189	7.56163	0.215296
	0.45	1.5	0.8	0.45	7.525	0.8	1000	0.417816	1.18101	-0.272419	0.102433	7.56202	0.0701018
	0.45	1.5	0.8	0.45	7.525	1.15	1000	0.366442	1.22631	-0.0866468	0.4001	7.53363	0.145197
	0.45	1.5	0.8	0.45	7.525	1.5	1000	0.424271	1.23056	-0.105376	0.0001	7.58862	0.0001
	0.45	1.5	0.8	0.45	10	0.45	1000	0.442949	1.24071	-0.089769	0.326895	10.0212	0.239914
	0.45	1.5	0.8	0.45	10	0.8	1000	0.42454	1.19333	-0.235415	0.289337	10.0199	0.114371
	0.45	1.5	0.8	0.45	10	1.15	1000	0.408346	1.23536	-0.0788333	0.160983	9.90245	0.607077
	0.45	1.5	0.8	0.45	10	1.5	1000	0.422423	1.25294	-0.0277359	0.0001	10.0322	0.20084
	0.45	1.5	0.8	0.8	2.575	0.45	1000	0.414584	1.17571	-0.286268	0.0001	3.39189	0.0420456
	0.45	1.5	0.8	0.8	2.575	0.8	1000	0.400934	1.22756	-0.103961	0.0001	3.09755	0.0368383
	0.45	1.5	0.8	0.8	2.575	1.15	1000	0.439762	1.25416	-0.0386649	0.0001	2.94754	0.264994
	0.45	1.5	0.8	0.8	2.575	1.5	1000	0.435479	1.22474	-0.135537	0.0001	2.90507	0.828272
	0.45	1.5	0.8	0.8	5.05	0.45	1000	0.398057	1.17309	-0.283979	0.0612322	5.06267	0.50006
	0.45	1.5	0.8	0.8	5.05	0.8	1000	0.354944	1.23227	-0.0581614	0.00404576	5.1612	0.400542
	0.45	1.5	0.8	0.8	5.05	1.15	1000	0.39629	1.24176	-0.0553917	0.119824	5.18571	0.121736
	0.45	1.5	0.8	0.8	5.05	1.5	1000	0.428366	1.20906	-0.182564	0.0001	5.20462	0.408672
	0.45	1.5	0.8	0.8	7.525	0.45	1000	0.359468	1.22453	-0.0916787	0.4001	7.35344	0.338421
	0.45	1.5	0.8	0.8	7.525	0.8	1000	0.39647	1.25561	-0.00288038	0.158489	7.57201	0.4001
	0.45	1.5	0.8	0.8	7.525	1.15	1000	0.379312	1.24514	-0.0343089	0.2001	7.58697	0.0713871
	0.45	1.5	0.8	0.8	7.525	1.5	1000	0.421498	1.21141	-0.168775	0.0001	7.61424	0.263578
	0.45	1.5	0.8	0.8	10	0.45	1000	0.437556	1.22212	-0.147832	0.220168	10.0341	0.266171
	0.45	1.5	0.8	0.8	10	0.8	1000	0.403018	1.2366	-0.0747838	0.188161	9.80333	0.579186
	0.45	1.5	0.8	0.8	10	1.15	1000	0.412989	1.25807	-0.00824105	0.0501	10.035	0.0001
	0.45	1.5	0.8	0.8	10	1.5	1000	0.414769	1.21497	-0.151899	0.0001	10.0554	0.233214
	0.45	1.5	0.8	1.15	2.575	0.45	1000	0.376316	1.23966	-0.0462549	0.0001	3.08994	0.4001
	0.45	1.5	0.8	1.15	2.575	0.8	1000	0.431428	1.2291	-0.116449	0.0001	3.01435	0.0001
	0.45	1.5	0.8	1.15	2.575	1.15	1000	0.430943	1.21437	-0.166678	0.0001	2.96412	0.633709
	0.45	1.5	0.8	1.15	2.575	1.5	1000	0.430009	1.2124	-0.172567	0.0001	2.92053	1.2327
	0.45	1.5	0.8	1.15	5.05	0.45	1000	0.371568	1.24817	-0.0119672	0.00418592	5.1693	0.406684
	0.45	1.5	0.8	1.15	5.05	0.8	1000	0.383923	1.25046	-0.0170814	0.0001	5.15622	0.247921
	0.45	1.5	0.8	1.15	5.05	1.15	1000	0.433449	1.22652	-0.127275	0.0001	5.23369	0.284952
	0.45	1.5	0.8	1.15	5.05	1.5	1000	0.428315	1.20896	-0.182869	0.0001	5.22279	0.905625
	0.45	1.5	0.8	1.15	7.525	0.45	1000	0.42814	1.20504	-0.197066	0.0136732	7.60181	0.400427
	0.45	1.5	0.8	1.15	7.525	0.8	1000	0.351861	1.21264	-0.12789	0.4001	7.59101	0.141752
	0.45	1.5	0.8	1.15	7.525	1.15	1000	0.434706	1.25421	-0.0331078	0.0001	7.63222	0.266382
	0.45	1.5	0.8	1.15	7.525	1.5	1000	0.424062	1.2009	-0.206833	0.0001	7.63792	0.71008
	0.45	1.5	0.8	1.15	10	0.45	1000	0.429693	1.20437	-0.201052	0.128529	10.0518	0.34268
	0.45	1.5	0.8	1.15	10	0.8	1000	0.38329	1.24817	-0.02675	0.2001	10.0459	0.0001
	0.45	1.5	0.8	1.15	10	1.15	1000	0.434153	1.2627	-0.00333657	0.0001	10.0716	0.248067
	0.45	1.5	0.8	1.15	10	1.5	1000	0.418615	1.19162	-0.234269	0.0001	10.0807	0.582471
	0.45	1.5	0.8	1.5	2.575	0.45	1000	0.384844	1.2	-0.186578	0.0001	3.00699	0.0546404
	0.45	1.5	0.8	1.5	2.575	0.8	1000	0.384049	1.14824	-0.359551	0.0001	3.00189	0.475462
	0.45	1.5	0.8	1.5	2.575	1.15	1000	0.400465	1.16634	-0.307932	0.0001	2.9642	1.09752
	0.45	1.5	0.8	1.5	2.575	1.5	1000	0.409277	1.17773	-0.274965	0.0001	2.9397	1.62391
	0.45	1.5	0.8	1.5	5.05	0.45	1000	0.357114	1.19177	-0.198316	0.235059	5.20863	0.0923939
	0.45	1.5	0.8	1.5	5.05	0.8	1000	0.422131	1.22701	-0.115915	0.0001	5.24702	0.251433
	0.45	1.5	0.8	1.5	5.05	1.15	1000	0.419777	1.19352	-0.228685	0.0001	5.25065	0.780399
	0.45	1.5	0.8	1.5	5.05	1.5	1000	0.419634	1.19328	-0.22938	0.0001	5.23857	1.36249
	0.45	1.5	0.8	1.5	7.525	0.45	1000	0.381787	1.2517	-0.0110499	0.2001	7.60611	0.070822
	0.45	1.5	0.8	1.5	7.525	0.8	1000	0.430829	1.26203	-0.00277555	0.0001	7.64396	0.241917
	0.45	1.5	0.8	1.5	7.525	1.15	1000	0.423963	1.20073	-0.207358	0.0001	7.65735	0.616178
	0.45	1.5	0.8	1.5	7.525	1.5	1000	0.420658	1.19498	-0.224355	0.0001	7.65289	1.19388
	0.45	1.5	0.8	1.5	10	0.45	1000	0.418324	1.18817	-0.247058	0.108009	10.069	0.490535
	0.45	1.5	0.8	1.5	10	0.8	1000	0.429294	1.22711	-0.121348	0.0001	10.0869	0.0001
	0.45	1.5	0.8	1.5	10	1.15	1000	0.425163	1.20291	-0.200868	0.0001	10.0961	0.524884
	0.45	1.5	0.8	1.5	10	1.5	1000	0.419565	1.19317	-0.229715	0.0001	10.0956	1.08279
	0.45	1.5	1.15	0.45	2.575	0.45	1000	0.450074	0.970639	-0.635069	0.0001	5.90561	0.0295458
	0.45	1.5	1.15	0.45	2.575	0.8	1000	0.337121	1.10523	-0.0960886	0.0001	4.06809	0.4001
	0.45	1.5	1.15	0.45	2.575	1.15	1000	0.341524	1.11626	-0.042778	0.0001	3.31979	0.8001
	0.45	1.5	1.15	0.45	2.575	1.5	1000	0.0470004	1.0519	-0.110712	0.0001	2.77856	0.295408
	0.45	1.5	1.15	0.45	5.05	0.45	1000	0.362413	1.13175	-0.0100758	0.0306068	5.10376	0.337282
	0.45	1.5	1.15	0.45	5.05	0.8	1000	0.350833	1.11677	-0.0223321	0.0148529	4.96795	0.354747
	0.45	1.5	1.15	0.45	5.05	1.15	1000	0.356709	1.11524	-0.0279255	0.0178717	4.99076	0.366799
	0.45	1.5	1.15	0.45	5.05	1.5	1000	0.341692	1.11566	-0.024317	0.1085	5.07269	0.197418
	0.45	1.5	1.15	0.45	7.525	0.45	1000	0.448389	0.941321	-0.74306	0.185051	7.62603	0.264455
	0.45	1.5	1.15	0.45	7.525	0.8	1000	0.449805	0.973177	-0.623989	0.125741	7.58907	0.195995
	0.45	1.5	1.15	0.45	7.525	1.15	1000	0.447642	0.934306	-0.707118	0.360372	7.44576	0.351826
	0.45	1.5	1.15	0.45	7.525	1.5	1000	0.434292	1.121	-0.0718728	0.11401	7.43987	0.33392
	0.45	1.5	1.15	0.45	10	0.45	1000	0.448399	1.06826	-0.314543	0.331215	10.0587	0.289304
	0.45	1.5	1.15	0.45	10	0.8	1000	0.449733	1.05334	-0.355527	0.29407	10.0416	0.214555
	0.45	1.5	1.15	0.45	10	1.15	1000	0.446361	1.06958	-0.276009	0.222217	10.0285	0.0001
	0.45	1.5	1.15	0.45	10	1.5	1000	0.422571	1.13225	-0.0273257	0.487775	9.91163	0.561214
	0.45	1.5	1.15	0.8	2.575	0.45	1000	0.450919	1.05197	-0.353473	0.0001	5.05058	0.0001
	0.45	1.5	1.15	0.8	2.575	0.8	1000	0.365235	1.1347	-0.00576453	0.0001	3.70372	0.4001
	0.45	1.5	1.15	0.8	2.575	1.15	1000	0.147995	1.04379	-0.167807	0.0001	2.94412	0.315461
	0.45	1.5	1.15	0.8	2.575	1.5	1000	-0.145832	1.02655	-0.0289902	0.0001	2.93231	0.280524
	0.45	1.5	1.15	0.8	5.05	0.45	1000	0.347593	1.11904	-0.0116794	0.107425	5.06306	0.19797
	0.45	1.5	1.15	0.8	5.05	0.8	1000	0.344755	1.10487	-0.0539567	0.0152182	5.00819	0.366657
	0.45	1.5	1.15	0.8	5.05	1.15	1000	0.368493	1.12692	-0.000728426	0.0001	5.0474	0.402537
	0.45	1.5	1.15	0.8	5.05	1.5	1000	0.319083	1.09931	-0.0727187	0.10769	5.08239	0.19335
	0.45	1.5	1.15	0.8	7.525	0.45	1000	0.450069	0.965701	-0.648137	0.077221	6.11991	0.0188187
	0.45	1.5	1.15	0.8	7.525	0.8	1000	0.450034	0.992428	-0.529495	0.159309	7.31769	0.788135
	0.45	1.5	1.15	0.8	7.525	1.15	1000	0.440124	0.909215	-0.769877	0.317258	7.42269	0.381669
	0.45	1.5	1.15	0.8	7.525	1.5	1000	0.420222	1.08402	-0.181519	0.0141485	7.37235	0.390911
	0.45	1.5	1.15	0.8	10	0.45	1000	0.448637	0.860297	-1.01507	0.256556	10.0641	0.313926
	0.45	1.5	1.15	0.8	10	0.8	1000	0.45018	0.954933	-0.672476	0.209099	8.64165	0.193873
	0.45	1.5	1.15	0.8	10	1.15	1000	0.418298	1.03529	-0.34561	0.402098	9.27256	0.560717
	0.45	1.5	1.15	0.8	10	1.5	1000	0.407512	1.07661	-0.197484	0.515927	9.88457	0.544057
	0.45	1.5	1.15	1.15	2.575	0.45	1000	0.450497	1.08882	-0.216219	0.0001	4.38688	0.0001
	0.45	1.5	1.15	1.15	2.575	0.8	1000	0.278151	1.09506	-0.0806749	0.0001	3.33079	0.8001
	0.45	1.5	1.15	1.15	2.575	1.15	1000	-0.387563	0.98013	-0.162138	0.0001	2.74757	0.295328
	0.45	1.5	1.15	1.15	2.575	1.5	1000	0.429245	1.15038	-0.015859	0.0001	3.23492	0.0501
	0.45	1.5	1.15	1.15	5.05	0.45	1000	0.336104	1.09832	-0.0697228	0.0126728	5.02951	0.369056
	0.45	1.5	1.15	1.15	5.05	0.8	1000	0.295692	1.08344	-0.0968491	0.135328	5.1136	0.196226
	0.45	1.5	1.15	1.15	5.05	1.15	1000	0.36098	1.12445	-0.011089	0.00960912	5.09156	0.388957
	0.45	1.5	1.15	1.15	5.05	1.5	1000	0.359118	1.12712	-0.0304355	0.1001	5.13675	0.273097
	0.45	1.5	1.15	1.15	7.525	0.45	1000	0.449948	1.10645	-0.176957	0.0611847	7.6198	0.42219
	0.45	1.5	1.15	1.15	7.525	0.8	1000	0.4442	0.921372	-0.739444	0.433461	7.46672	0.379012
	0.45	1.5	1.15	1.15	7.525	1.15	1000	0.43096	1.10769	-0.115727	0.0964442	7.42061	0.352377
	0.45	1.5	1.15	1.15	7.525	1.5	1000	0.336064	1.10797	-0.064163	0.185175	7.66278	0.410294
	0.45	1.5	1.15	1.15	10	0.45	1000	0.449772	1.10935	-0.168553	0.189822	10.0619	0.41616
	0.45	1.5	1.15	1.15	10	0.8	1000	0.447888	0.917904	-0.774204	0.180276	8.89025	0.300924
	0.45	1.5	1.15	1.15	10	1.15	1000	0.414234	1.06069	-0.250566	0.445556	9.87838	0.595762
	0.45	1.5	1.15	1.15	10	1.5	1000	0.404828	1.11733	-0.0701538	0.8001	10.0645	0.0001
	0.45	1.5	1.15	1.5	2.575	0.45	1000	0.44108	1.13016	-0.0557342	0.0001	3.63262	0.0382437
	0.45	1.5	1.15	1.5	2.575	0.8	1000	-0.0361682	1.07292	-0.0181465	0.0001	3.09939	0.297792
	0.45	1.5	1.15	1.5	2.575	1.15	1000	0.412218	1.14517	-0.0131824	0.0001	3.23685	0.1001
	0.45	1.5	1.15	1.5	2.575	1.5	1000	0.451332	0.986816	-0.566706	0.0001	3.35102	0.0001
	0.45	1.5	1.15	1.5	5.05	0.45	1000	0.293881	1.08205	-0.0995656	0.13534	5.13361	0.1947
	0.45	1.5	1.15	1.5	5.05	0.8	1000	0.333256	1.11652	-0.0185417	0.0729509	5.15081	0.286254
	0.45	1.5	1.15	1.5	5.05	1.15	1000	0.348374	1.11769	-0.045108	0.2001	5.16826	0.260767
	0.45	1.5	1.15	1.5	5.05	1.5	1000	0.450711	1.1382	-0.0643913	0.0001	5.37137	0.0001
	0.45	1.5	1.15	1.5	7.525	0.45	1000	0.443614	0.918646	-0.747097	0.375123	7.49111	0.36826
	0.45	1.5	1.15	1.5	7.525	0.8	1000	0.432606	1.1146	-0.0922712	0.135485	7.47832	0.341679
	0.45	1.5	1.15	1.5	7.525	1.15	1000	0.41289	1.13931	-0.0114741	0.15009	7.4808	0.494875
	0.45	1.5	1.15	1.5	7.525	1.5	1000	0.385234	1.13694	-0.024518	0.2001	7.71169	0.0678535
	0.45	1.5	1.15	1.5	10	0.45	1000	0.450204	1.07343	-0.284364	0.151302	10.0828	0.483404
	0.45	1.5	1.15	1.5	10	0.8	1000	0.418851	1.08268	-0.182171	0.449113	9.91845	0.594485
	0.45	1.5	1.15	1.5	10	1.15	1000	0.415252	1.14001	-0.00468889	0.8001	10.078	0.136399
	0.45	1.5	1.15	1.5	10	1.5	1000	0.355282	1.10262	-0.108251	0.4001	10.1226	0.0001
	0.45	1.5	1.5	0.45	2.575	0.45	1000	-0.171858	0.873236	-0.0428042	0.186485	8.07182	0.317871
	0.45	1.5	1.5	0.45	2.575	0.8	1000	0.39594	0.828914	-0.64499	0.0001	5.2429	0.301464
	0.45	1.5	1.5	0.45	2.575	1.15	1000	0.404157	1.00774	-0.105577	0.0001	4.51179	0.289097
	0.45	1.5	1.5	0.45	2.575	1.5	1000	0.400767	0.823203	-0.693625	0.0001	3.46875	0.0234872
	0.45	1.5	1.5	0.45	5.05	0.45	1000	0.365819	0.992232	-0.0828465	0.034921	4.97448	0.457321
	0.45	1.5	1.5	0.45	5.05	0.8	1000	0.389642	0.83063	-0.714817	0.260087	5.10693	0.287629
	0.45	1.5	1.5	0.45	5.05	1.15	1000	0.395844	0.817932	-0.743111	0.225796	5.1128	0.284766
	0.45	1.5	1.5	0.45	5.05	1.5	1000	0.307486	0.969575	-0.0194458	0.106054	5.10213	0.200209
	0.45	1.5	1.5	0.45	7.525	0.45	1000	0.360715	0.618195	-1.4353	0.220904	7.83128	0.284441
	0.45	1.5	1.5	0.45	7.525	0.8	1000	0.366645	0.633979	-1.37508	0.214433	7.69559	0.191171
	0.45	1.5	1.5	0.45	7.525	1.15	1000	0.393862	0.798775	-0.807325	0.314976	7.52311	0.359429
	0.45	1.5	1.5	0.45	7.525	1.5	1000	0.417158	0.988418	-0.166041	0.243308	7.53076	0.299052
	0.45	1.5	1.5	0.45	10	0.45	1000	0.379778	0.81307	-0.787751	0.342911	10.1871	0.309468
	0.45	1.5	1.5	0.45	10	0.8	1000	0.383667	0.815216	-0.774161	0.345281	10.1195	0.24332
	0.45	1.5	1.5	0.45	10	1.15	1000	0.405614	0.982865	-0.20605	0.312144	10.0439	0.0661944
	0.45	1.5	1.5	0.45	10	1.5	1000	0.409855	0.888253	-0.494045	0.293814	9.97098	0.378545
	0.45	1.5	1.5	0.8	2.575	0.45	1000	0.211321	0.999913	-0.213044	0.0345652	5.91948	0.193446
	0.45	1.5	1.5	0.8	2.575	0.8	1000	0.36395	0.959358	-0.125789	0.0001	4.5173	0.323264
	0.45	1.5	1.5	0.8	2.575	1.15	1000	0.418967	0.988853	-0.142539	0.0001	3.74554	0.0001
	0.45	1.5	1.5	0.8	2.575	1.5	1000	0.396135	0.919779	-0.400043	0.0001	3.18696	0.0654682
	0.45	1.5	1.5	0.8	5.05	0.45	1000	0.404079	1.0073	-0.13326	0.340431	5.13514	0.29804
	0.45	1.5	1.5	0.8	5.05	0.8	1000	0.392028	0.808687	-0.779588	0.202304	5.13719	0.283385
	0.45	1.5	1.5	0.8	5.05	1.15	1000	0.320949	0.959103	-0.074241	0.280121	5.12163	0.0625168
	0.45	1.5	1.5	0.8	5.05	1.5	1000	0.343161	1.0103	-0.011352	0.0589162	5.09481	0.341631
	0.45	1.5	1.5	0.8	7.525	0.45	1000	0.405963	0.812855	-0.730012	0.177023	6.55925	0.120252
	0.45	1.5	1.5	0.8	7.525	0.8	1000	0.400888	0.892282	-0.500471	0.215693	7.38773	0.308125
	0.45	1.5	1.5	0.8	7.525	1.15	1000	0.396658	0.748968	-0.957529	0.24872	7.53693	0.310768
	0.45	1.5	1.5	0.8	7.525	1.5	1000	0.416305	0.904275	-0.428363	0.249395	7.52617	0.308093
	0.45	1.5	1.5	0.8	10	0.45	1000	0.39899	0.991354	-0.192304	0.286156	10.0927	0.334396
	0.45	1.5	1.5	0.8	10	0.8	1000	0.406796	0.836449	-0.62435	0.273736	8.27123	0.0361961
	0.45	1.5	1.5	0.8	10	1.15	1000	0.408716	0.832223	-0.668725	0.300932	9.62097	0.598326
	0.45	1.5	1.5	0.8	10	1.5	1000	0.416865	0.923515	-0.367586	0.322579	9.98177	0.352551
	0.45	1.5	1.5	1.15	2.575	0.45	1000	0.246613	1.02018	-0.132019	0.134333	5.02179	0.282912
	0.45	1.5	1.5	1.15	2.575	0.8	1000	0.398942	1.02848	-0.0548993	0.0001	4.76472	0.285293
	0.45	1.5	1.5	1.15	2.575	1.15	1000	0.401126	0.846402	-0.617014	0.0001	3.42212	0.030703
	0.45	1.5	1.5	1.15	2.575	1.5	1000	0.386376	1.00079	-0.157629	0.0001	3.02637	0.0768267
	0.45	1.5	1.5	1.15	5.05	0.45	1000	0.278729	0.934815	-0.146321	0.243276	5.11873	0.0402456
	0.45	1.5	1.5	1.15	5.05	0.8	1000	0.402058	0.869383	-0.569819	0.386606	5.18898	0.300075
	0.45	1.5	1.5	1.15	5.05	1.15	1000	0.399463	0.673727	-1.1835	0.111317	5.06123	0.279503
	0.45	1.5	1.5	1.15	5.05	1.5	1000	0.310172	0.945012	-0.0986439	0.281174	5.14054	0.0611512
	0.45	1.5	1.5	1.15	7.525	0.45	1000	0.389938	0.879756	-0.559882	0.115163	7.69851	0.384597
	0.45	1.5	1.5	1.15	7.525	0.8	1000	0.400791	0.833503	-0.684801	0.244997	7.56183	0.308017
	0.45	1.5	1.5	1.15	7.525	1.15	1000	0.421195	1.02877	-0.0306391	0.242285	7.5641	0.299603
	0.45	1.5	1.5	1.15	7.525	1.5	1000	0.416017	0.815018	-0.699299	0.302862	7.45313	0.348787
	0.45	1.5	1.5	1.15	10	0.45	1000	0.391051	0.896909	-0.503881	0.239906	10.1092	0.389947
	0.45	1.5	1.5	1.15	10	0.8	1000	0.354557	1.02258	-0.0186673	0.268235	7.87215	0.2001
	0.45	1.5	1.5	1.15	10	1.15	1000	0.42095	1.0213	-0.0545881	0.328915	10.005	0.342895
	0.45	1.5	1.5	1.15	10	1.5	1000	0.416355	0.765296	-0.852178	0.315985	9.90714	0.38742
	0.45	1.5	1.5	1.5	2.575	0.45	1000	0.374134	0.92406	-0.412886	0.0001	5.86378	0.268346
	0.45	1.5	1.5	1.5	2.575	0.8	1000	0.37966	1.06219	-0.0595991	0.0001	4.8284	0.283045
	0.45	1.5	1.5	1.5	2.575	1.15	1000	0.39442	0.92697	-0.362981	0.0001	3.10102	0.0374407
	0.45	1.5	1.5	1.5	2.575	1.5	1000	-0.198646	0.163693	-0.0930296	0.0001	4.18532	0.303744
	0.45	1.5	1.5	1.5	5.05	0.45	1000	0.399202	0.817803	-0.736721	0.227393	5.19595	0.287666
	0.45	1.5	1.5	1.5	5.05	0.8	1000	0.400932	0.718899	-1.04078	0.328865	5.17814	0.303891
	0.45	1.5	1.5	1.5	5.05	1.15	1000	0.320027	0.985032	-0.00094798	0.020254	5.08849	0.364652
	0.45	1.5	1.5	1.5	5.05	1.5	1000	0.322884	0.979011	-0.0202988	0.0221537	5.06216	0.376064
	0.45	1.5	1.5	1.5	7.525	0.45	1000	0.399979	0.818697	-0.732831	0.246676	7.5776	0.309334
	0.45	1.5	1.5	1.5	7.525	0.8	1000	0.40381	0.74584	-0.950905	0.250276	7.55676	0.314702
	0.45	1.5	1.5	1.5	7.525	1.15	1000	0.414902	0.809882	-0.719724	0.281026	7.49277	0.341022
	0.45	1.5	1.5	1.5	7.525	1.5	1000	0.420204	0.829304	-0.619619	0.294434	7.35143	0.362913
	0.45	1.5	1.5	1.5	10	0.45	1000	0.388239	0.847138	-0.665571	0.218658	10.1409	0.429005
	0.45	1.5	1.5	1.5	10	0.8	1000	0.417981	0.994824	-0.143945	0.327533	10.0215	0.347405
	0.45	1.5	1.5	1.5	10	1.15	1000	0.417544	0.820548	-0.679922	0.319995	9.94092	0.378428
	0.45	1.5	1.5	1.5	10	1.5	1000	0.41959	0.824635	-0.645057	0.274846	9.81627	0.41249
	0.8	0.45	0.45	0.45	2.575	0.45	15.9899	0.168059	0.160181	0.655491	0.767571	26.772	0.395502
	0.8	0.45	0.45	0.45	2.575	0.8	15.9899	0.168058	0.160186	0.655479	0.767566	26.7717	0.395501
	0.8	0.45	0.45	0.45	2.575	1.15	1000	0.0646179	0.747452	-0.0205331	0.491726	13.1664	0.327498
	0.8	0.45	0.45	0.45	2.575	1.5	1000	-0.634178	0.449611	-0.236565	0.0001	4.60409	0.190991
	0.8	0.45	0.45	0.45	5.05	0.45	15.9899	0.168063	0.160183	0.655497	0.767562	26.771	0.395499
	0.8	0.45	0.45	0.45	5.05	0.8	15.9899	0.168048	0.160187	0.655478	0.76757	26.7719	0.395503
	0.8	0.45	0.45	0.45	5.05	1.15	15.9899	0.168058	0.160182	0.65549	0.767573	26.7722	0.395502
	0.8	0.45	0.45	0.45	5.05	1.5	15.9899	0.16806	0.160181	0.655493	0.767572	26.7721	0.395503
	0.8	0.45	0.45	0.45	7.525	0.45	15.9899	0.168057	0.160185	0.655482	0.767567	26.7718	0.395502
	0.8	0.45	0.45	0.45	7.525	0.8	15.9899	0.168053	0.160187	0.655474	0.767572	26.7721	0.395501
	0.8	0.45	0.45	0.45	7.525	1.15	15.9899	0.168062	0.160178	0.655502	0.767564	26.7717	0.395502
	0.8	0.45	0.45	0.45	7.525	1.5	1000	-0.338617	0.981156	-0.0946412	0.221504	7.32453	0.302712
	0.8	0.45	0.45	0.45	10	0.45	15.9899	0.168059	0.160179	0.655497	0.767572	26.7721	0.395503
	0.8	0.45	0.45	0.45	10	0.8	15.9899	0.168051	0.160185	0.65548	0.767576	26.7725	0.395502
	0.8	0.45	0.45	0.45	10	1.15	1000	-0.0156266	0.49612	-0.0184354	0.429742	10.2493	0.550718
	0.8	0.45	0.45	0.45	10	1.5	15.9899	0.168056	0.160186	0.655482	0.767596	26.7737	0.395509
	0.8	0.45	0.45	0.8	2.575	0.45	15.9899	0.168057	0.160191	0.655466	0.767571	26.7721	0.395503
	0.8	0.45	0.45	0.8	2.575	0.8	15.9899	0.168061	0.160185	0.655482	0.76757	26.772	0.395502
	0.8	0.45	0.45	0.8	2.575	1.15	1000	-0.393303	0.363467	-0.176338	0.0001	4.53059	0.249273
	0.8	0.45	0.45	0.8	2.575	1.5	1000	-0.939486	0.660545	-0.272286	0.0001	4.41685	0.236804
	0.8	0.45	0.45	0.8	5.05	0.45	15.9899	0.168061	0.160182	0.655489	0.767631	26.7759	0.395516
	0.8	0.45	0.45	0.8	5.05	0.8	15.9899	0.168059	0.16018	0.655495	0.76757	26.772	0.395502
	0.8	0.45	0.45	0.8	5.05	1.15	15.9899	0.168058	0.160182	0.65549	0.767568	26.7719	0.395501
	0.8	0.45	0.45	0.8	5.05	1.5	1000	0.230645	0.676655	-0.257518	0.0628078	5.25848	0.316203
	0.8	0.45	0.45	0.8	7.525	0.45	15.9899	0.16806	0.160163	0.655532	0.767544	26.7701	0.39549
	0.8	0.45	0.45	0.8	7.525	0.8	15.9899	0.168058	0.160183	0.65549	0.767566	26.7718	0.395501
	0.8	0.45	0.45	0.8	7.525	1.15	15.9899	0.168054	0.16019	0.655473	0.767576	26.7723	0.395507
	0.8	0.45	0.45	0.8	7.525	1.5	1000	-0.445198	1.41684	-0.112999	0.225568	7.31908	0.418849
	0.8	0.45	0.45	0.8	10	0.45	15.9899	0.168059	0.160176	0.655507	0.767588	26.773	0.395509
	0.8	0.45	0.45	0.8	10	0.8	15.9899	0.16806	0.16018	0.655497	0.767586	26.7729	0.395505
	0.8	0.45	0.45	0.8	10	1.15	15.9899	0.168057	0.160197	0.65545	0.767581	26.7727	0.395503
	0.8	0.45	0.45	0.8	10	1.5	1000	-0.0522161	0.821187	-0.0970119	0.8001	10.022	0.109318
	0.8	0.45	0.45	1.15	2.575	0.45	1000	0.00241541	0.800368	-0.237823	0.0001	4.86708	0.364638
	0.8	0.45	0.45	1.15	2.575	0.8	15.9899	0.168057	0.160188	0.655477	0.767571	26.7721	0.395499
	0.8	0.45	0.45	1.15	2.575	1.15	1000	0.0187811	0.833126	-0.0488125	0.461542	12.0411	0.340341
	0.8	0.45	0.45	1.15	2.575	1.5	15.9899	0.168058	0.160182	0.655492	0.767607	26.7741	0.395511
	0.8	0.45	0.45	1.15	5.05	0.45	15.9899	0.168053	0.160191	0.655472	0.76759	26.7735	0.395507
	0.8	0.45	0.45	1.15	5.05	0.8	15.9899	0.168062	0.160178	0.655503	0.767577	26.7723	0.395501
	0.8	0.45	0.45	1.15	5.05	1.15	15.9899	0.168061	0.160178	0.655502	0.767573	26.7722	0.395503
	0.8	0.45	0.45	1.15	5.05	1.5	1000	-0.852763	1.03147	-0.180077	0.061247	5.33066	0.291278
	0.8	0.45	0.45	1.15	7.525	0.45	15.9899	0.168057	0.160182	0.655491	0.76757	26.772	0.395501
	0.8	0.45	0.45	1.15	7.525	0.8	15.9899	0.168053	0.160195	0.655457	0.76757	26.772	0.3955
	0.8	0.45	0.45	1.15	7.525	1.15	15.9899	0.168047	0.160192	0.655466	0.7676	26.7741	0.395509
	0.8	0.45	0.45	1.15	7.525	1.5	1000	-0.917639	1.87501	-0.177038	0.213507	7.56947	0.307648
	0.8	0.45	0.45	1.15	10	0.45	15.9899	0.168061	0.160182	0.655488	0.767574	26.7723	0.395504
	0.8	0.45	0.45	1.15	10	0.8	1000	0.000131425	0.693534	-0.0383908	0.371421	9.88041	0.396014
	0.8	0.45	0.45	1.15	10	1.15	15.9899	0.168059	0.160179	0.655498	0.767574	26.7722	0.395502
	0.8	0.45	0.45	1.15	10	1.5	1000	-0.0186852	0.884376	-0.0106445	0.318399	9.94199	0.384528
	0.8	0.45	0.45	1.5	2.575	0.45	1000	0.376557	3.07896	-0.0275547	0.0001	3.01877	0.0001
	0.8	0.45	0.45	1.5	2.575	0.8	1000	-0.599819	0.833657	-0.12744	0.0001	4.59851	0.345525
	0.8	0.45	0.45	1.5	2.575	1.15	1000	-1.146	1.07901	-0.144156	0.0001	4.0653	0.24164
	0.8	0.45	0.45	1.5	2.575	1.5	1000	-0.658459	0.91982	-0.157614	0.0001	3.17478	0.603821
	0.8	0.45	0.45	1.5	5.05	0.45	1000	-0.151881	0.898044	-0.0425728	0.00847006	5.15352	0.383288
	0.8	0.45	0.45	1.5	5.05	0.8	1000	0.0611148	1.00602	-0.0540529	0.0931323	5.23273	0.25781
	0.8	0.45	0.45	1.5	5.05	1.15	1000	-0.50604	1.01222	-0.147986	0.0649635	5.26879	0.262508
	0.8	0.45	0.45	1.5	5.05	1.5	1000	-1.17645	1.23409	-0.316881	0.0001	4.96245	0.0984536
	0.8	0.45	0.45	1.5	7.525	0.45	15.9899	0.168055	0.160183	0.655485	0.767578	26.7726	0.395501
	0.8	0.45	0.45	1.5	7.525	0.8	1000	-0.19935	0.960929	-0.0951232	0.223451	7.58455	0.304734
	0.8	0.45	0.45	1.5	7.525	1.15	1000	-1.32501	1.08738	-0.177064	0.237905	6.59879	0.176
	0.8	0.45	0.45	1.5	7.525	1.5	1000	-0.715183	1.08729	-0.22542	0.229655	7.623	0.283274
	0.8	0.45	0.45	1.5	10	0.45	15.9899	0.168045	0.160197	0.655453	0.767578	26.7726	0.395501
	0.8	0.45	0.45	1.5	10	0.8	15.9899	0.168043	0.160202	0.65544	0.76761	26.7746	0.395505
	0.8	0.45	0.45	1.5	10	1.15	1000	-0.755923	1.12558	-0.0522697	0.358301	10.1867	0.305982
	0.8	0.45	0.45	1.5	10	1.5	1000	-0.446617	0.922457	-0.0753348	0.342144	10.0811	0.340535
	0.8	0.45	0.8	0.45	2.575	0.45	15.9899	0.168056	0.160184	0.655485	0.767567	26.7718	0.395501
	0.8	0.45	0.8	0.45	2.575	0.8	1000	0.283388	0.265674	-0.0441516	0.0001	3.84583	0.218429
	0.8	0.45	0.8	0.45	2.575	1.15	1000	-0.599381	0.248849	-0.281037	0.0001	4.69715	0.353823
	0.8	0.45	0.8	0.45	2.575	1.5	1000	-1.21389	0.1703	-0.048137	0.0001	3.72698	0.318979
	0.8	0.45	0.8	0.45	5.05	0.45	15.9899	0.168056	0.160178	0.655497	0.767588	26.7731	0.395506
	0.8	0.45	0.8	0.45	5.05	0.8	15.9899	0.168063	0.160177	0.655505	0.767577	26.7725	0.395505
	0.8	0.45	0.8	0.45	5.05	1.15	15.9899	0.168066	0.160173	0.655511	0.767583	26.7728	0.395502
	0.8	0.45	0.8	0.45	5.05	1.5	1000	0.0283404	0.830023	-0.0286216	0.539368	15.6067	0.350347
	0.8	0.45	0.8	0.45	7.525	0.45	15.9899	0.168058	0.160181	0.655491	0.767569	26.772	0.395501
	0.8	0.45	0.8	0.45	7.525	0.8	1000	-0.325815	0.832647	-0.303405	0.265069	8.28879	0.624193
	0.8	0.45	0.8	0.45	7.525	1.15	15.9899	0.168054	0.160181	0.655494	0.767576	26.7725	0.395502
	0.8	0.45	0.8	0.45	7.525	1.5	1000	-0.188021	0.970515	-0.141854	0.175514	7.34867	0.68144
	0.8	0.45	0.8	0.45	10	0.45	15.9899	0.168061	0.160184	0.655483	0.767575	26.7722	0.395501
	0.8	0.45	0.8	0.45	10	0.8	15.9899	0.168056	0.160189	0.655468	0.767576	26.7722	0.395504
	0.8	0.45	0.8	0.45	10	1.15	15.9899	0.168052	0.160198	0.655452	0.767575	26.7723	0.395502
	0.8	0.45	0.8	0.45	10	1.5	15.9899	0.168039	0.160202	0.655439	0.767602	26.774	0.395508
	0.8	0.45	0.8	0.8	2.575	0.45	15.9899	0.168051	0.160187	0.655481	0.767615	26.7743	0.395523
	0.8	0.45	0.8	0.8	2.575	0.8	1000	-0.364278	0.265895	-0.224265	0.0001	4.46002	0.330269
	0.8	0.45	0.8	0.8	2.575	1.15	1000	-0.847467	0.23014	-0.229492	0.0001	4.30959	0.315718
	0.8	0.45	0.8	0.8	2.575	1.5	1000	-1.06885	0.297736	-0.207663	0.0001	5.24258	0.268699
	0.8	0.45	0.8	0.8	5.05	0.45	15.9899	0.168058	0.160183	0.655488	0.767569	26.7719	0.395501
	0.8	0.45	0.8	0.8	5.05	0.8	15.9899	0.168056	0.160185	0.655483	0.767573	26.7722	0.395502
	0.8	0.45	0.8	0.8	5.05	1.15	15.9899	0.168065	0.160173	0.655513	0.767588	26.7731	0.395505
	0.8	0.45	0.8	0.8	5.05	1.5	1000	0.0235799	0.863059	-0.0333265	0.545396	15.518	0.349368
	0.8	0.45	0.8	0.8	7.525	0.45	15.9899	0.168062	0.160194	0.655453	0.767586	26.7731	0.395502
	0.8	0.45	0.8	0.8	7.525	0.8	15.9899	0.16805	0.160196	0.655458	0.767573	26.7722	0.395501
	0.8	0.45	0.8	0.8	7.525	1.15	15.9899	0.16805	0.160198	0.655454	0.767581	26.7725	0.395504
	0.8	0.45	0.8	0.8	7.525	1.5	1000	-0.0822485	0.768011	-0.0299924	0.160872	7.49157	0.304721
	0.8	0.45	0.8	0.8	10	0.45	15.9899	0.168059	0.160181	0.655492	0.767569	26.7719	0.395502
	0.8	0.45	0.8	0.8	10	0.8	15.9899	0.168051	0.160197	0.655454	0.76764	26.7766	0.395515
	0.8	0.45	0.8	0.8	10	1.15	1000	0.288517	0.449037	-0.0428851	0.334988	9.87613	0.343949
	0.8	0.45	0.8	0.8	10	1.5	15.9899	0.168058	0.160183	0.655489	0.767605	26.7742	0.395516
	0.8	0.45	0.8	1.15	2.575	0.45	15.9899	0.16806	0.160179	0.655497	0.767571	26.7721	0.395502
	0.8	0.45	0.8	1.15	2.575	0.8	15.9899	0.168058	0.16018	0.655494	0.767571	26.772	0.395501
	0.8	0.45	0.8	1.15	2.575	1.15	1000	-1.36784	0.375585	-0.027009	0.0001	5.35618	0.36329
	0.8	0.45	0.8	1.15	2.575	1.5	1000	0.0352174	0.788172	-0.0156177	0.560393	15.0584	0.372274
	0.8	0.45	0.8	1.15	5.05	0.45	1000	0.0335149	0.793654	-0.00256901	0.573726	16.9742	0.366924
	0.8	0.45	0.8	1.15	5.05	0.8	15.9899	0.168053	0.160203	0.65544	0.767588	26.7733	0.395506
	0.8	0.45	0.8	1.15	5.05	1.15	1000	0.0264126	0.831077	-0.0534191	0.506474	13.3999	0.346707
	0.8	0.45	0.8	1.15	5.05	1.5	1000	0.0130028	0.796814	-0.011831	0.470986	13.1934	0.343863
	0.8	0.45	0.8	1.15	7.525	0.45	15.9899	0.168059	0.16018	0.655495	0.76757	26.772	0.395502
	0.8	0.45	0.8	1.15	7.525	0.8	15.9899	0.168056	0.160185	0.655483	0.767578	26.7725	0.395502
	0.8	0.45	0.8	1.15	7.525	1.15	15.9899	0.168057	0.160185	0.655485	0.767599	26.7736	0.395502
	0.8	0.45	0.8	1.15	7.525	1.5	1000	-0.650754	1.62636	-0.291614	0.245896	7.7153	0.326746
	0.8	0.45	0.8	1.15	10	0.45	15.9899	0.168059	0.160182	0.655489	0.76757	26.7719	0.395503
	0.8	0.45	0.8	1.15	10	0.8	15.9899	0.168058	0.160183	0.655489	0.767569	26.7719	0.395502
	0.8	0.45	0.8	1.15	10	1.15	15.9899	0.168058	0.160183	0.655487	0.767568	26.7719	0.395501
	0.8	0.45	0.8	1.15	10	1.5	15.9899	0.168072	0.160177	0.655507	0.767582	26.7724	0.395504
	0.8	0.45	0.8	1.5	2.575	0.45	15.9899	0.168061	0.160175	0.65551	0.76758	26.7727	0.395506
	0.8	0.45	0.8	1.5	2.575	0.8	15.9899	0.168053	0.160193	0.655459	0.767598	26.774	0.395507
	0.8	0.45	0.8	1.5	2.575	1.15	15.9899	0.168055	0.160191	0.655462	0.767579	26.7726	0.395506
	0.8	0.45	0.8	1.5	2.575	1.5	1000	-2.78997	0.854261	-0.571928	0.000427457	4.77943	0.275923
	0.8	0.45	0.8	1.5	5.05	0.45	1000	0.454196	0.776004	-0.00159788	0.00439331	5.18158	0.328671
	0.8	0.45	0.8	1.5	5.05	0.8	15.9899	0.168062	0.160173	0.655511	0.767596	26.7737	0.395511
	0.8	0.45	0.8	1.5	5.05	1.15	15.9899	0.168057	0.160185	0.655484	0.767651	26.7772	0.395516
	0.8	0.45	0.8	1.5	5.05	1.5	1000	-1.188	0.748124	-0.167838	0.0546095	5.29475	0.262851
	0.8	0.45	0.8	1.5	7.525	0.45	15.9899	0.168057	0.160178	0.655503	0.7676	26.7739	0.395507
	0.8	0.45	0.8	1.5	7.525	0.8	15.9899	0.168053	0.160192	0.655464	0.767571	26.7719	0.395502
	0.8	0.45	0.8	1.5	7.525	1.15	1000	-0.523978	1.61766	-0.305085	0.241357	7.79566	0.397245
	0.8	0.45	0.8	1.5	7.525	1.5	1000	-0.632977	0.664667	-0.0593966	0.230224	7.64808	0.27591
	0.8	0.45	0.8	1.5	10	0.45	15.9899	0.168048	0.1602	0.655445	0.76761	26.7745	0.39551
	0.8	0.45	0.8	1.5	10	0.8	15.9899	0.168048	0.160202	0.655437	0.767611	26.7747	0.395515
	0.8	0.45	0.8	1.5	10	1.15	15.9899	0.168056	0.160185	0.655477	0.767575	26.7722	0.395502
	0.8	0.45	0.8	1.5	10	1.5	15.9899	0.168057	0.160182	0.655488	0.767569	26.7719	0.395501
	0.8	0.45	1.15	0.45	2.575	0.45	15.9899	0.168057	0.160187	0.655478	0.767578	26.7725	0.395504
	0.8	0.45	1.15	0.45	2.575	0.8	1000	0.0294697	0.851308	-0.0292037	0.58223	16.8926	0.342846
	0.8	0.45	1.15	0.45	2.575	1.15	1000	-0.00585826	0.89478	-0.0473386	0.541438	15.0475	0.341349
	0.8	0.45	1.15	0.45	2.575	1.5	1000	0.0346056	0.814144	-0.0137382	0.413735	11.6385	0.337758
	0.8	0.45	1.15	0.45	5.05	0.45	1000	0.0115545	0.862738	-0.0610448	0.597844	16.9576	0.361153
	0.8	0.45	1.15	0.45	5.05	0.8	1000	0.0569844	0.77796	-0.00140166	0.491968	14.2921	0.346369
	0.8	0.45	1.15	0.45	5.05	1.15	15.9899	0.168052	0.160201	0.655438	0.767616	26.775	0.395513
	0.8	0.45	1.15	0.45	5.05	1.5	1000	0.0399682	0.81452	-0.0143928	0.667123	20.5051	0.395129
	0.8	0.45	1.15	0.45	7.525	0.45	15.9899	0.168063	0.160178	0.655502	0.767575	26.7724	0.395502
	0.8	0.45	1.15	0.45	7.525	0.8	15.9899	0.168054	0.160183	0.655486	0.767601	26.7741	0.395505
	0.8	0.45	1.15	0.45	7.525	1.15	15.9899	0.16806	0.160186	0.655479	0.767571	26.7721	0.395505
	0.8	0.45	1.15	0.45	7.525	1.5	15.9899	0.168069	0.160167	0.655526	0.767574	26.7721	0.395503
	0.8	0.45	1.15	0.45	10	0.45	1000	0.157571	0.297526	-0.0126529	0.343023	10.0786	0.335033
	0.8	0.45	1.15	0.45	10	0.8	15.9899	0.168059	0.160187	0.655478	0.767571	26.7721	0.395504
	0.8	0.45	1.15	0.45	10	1.15	15.9899	0.168058	0.160183	0.655485	0.767574	26.7722	0.395503
	0.8	0.45	1.15	0.45	10	1.5	15.9899	0.168048	0.160193	0.655466	0.767573	26.7721	0.395501
	0.8	0.45	1.15	0.8	2.575	0.45	15.9899	0.168044	0.16018	0.655492	0.767589	26.7733	0.395503
	0.8	0.45	1.15	0.8	2.575	0.8	1000	0.0496719	0.754656	-0.0096205	0.480532	12.9379	0.352383
	0.8	0.45	1.15	0.8	2.575	1.15	1000	0.0221001	0.851149	-0.0318114	0.469323	13.5666	0.371974
	0.8	0.45	1.15	0.8	2.575	1.5	1000	0.0345797	0.257005	-0.0519137	0.0001	4.31366	0.227403
	0.8	0.45	1.15	0.8	5.05	0.45	15.9899	0.168057	0.160188	0.655476	0.767614	26.7747	0.395509
	0.8	0.45	1.15	0.8	5.05	0.8	15.9899	0.168059	0.160173	0.655512	0.76758	26.7726	0.395503
	0.8	0.45	1.15	0.8	5.05	1.15	1000	0.00890068	0.765362	-0.0855323	0.383351	10.6403	0.335607
	0.8	0.45	1.15	0.8	5.05	1.5	15.9899	0.168032	0.160231	0.655357	0.76755	26.7715	0.395489
	0.8	0.45	1.15	0.8	7.525	0.45	15.9899	0.168059	0.16018	0.655496	0.767561	26.7715	0.3955
	0.8	0.45	1.15	0.8	7.525	0.8	15.9899	0.168054	0.160189	0.655473	0.767571	26.7721	0.395505
	0.8	0.45	1.15	0.8	7.525	1.15	15.9899	0.168057	0.160183	0.655486	0.767569	26.772	0.395501
	0.8	0.45	1.15	0.8	7.525	1.5	15.9899	0.168048	0.160194	0.655461	0.767579	26.7727	0.395506
	0.8	0.45	1.15	0.8	10	0.45	15.9899	0.168058	0.160193	0.655465	0.767587	26.773	0.395508
	0.8	0.45	1.15	0.8	10	0.8	15.9899	0.168054	0.160197	0.655453	0.767573	26.7722	0.395502
	0.8	0.45	1.15	0.8	10	1.15	15.9899	0.168059	0.160184	0.655484	0.76758	26.7727	0.395505
	0.8	0.45	1.15	0.8	10	1.5	15.9899	0.168058	0.16018	0.655494	0.767567	26.7718	0.395501
	0.8	0.45	1.15	1.15	2.575	0.45	15.9899	0.168057	0.160182	0.65549	0.767602	26.7739	0.395506
	0.8	0.45	1.15	1.15	2.575	0.8	1000	-0.194471	0.196609	-0.0666194	0.0001	4.5507	0.190258
	0.8	0.45	1.15	1.15	2.575	1.15	1000	-0.575789	0.231223	-0.224861	0.0001	5.02808	0.441105
	0.8	0.45	1.15	1.15	2.575	1.5	1000	-0.239141	0.274425	-0.271564	0.0001	3.21533	0.0001
	0.8	0.45	1.15	1.15	5.05	0.45	15.9899	0.168061	0.160181	0.65549	0.767567	26.7718	0.395498
	0.8	0.45	1.15	1.15	5.05	0.8	15.9899	0.16805	0.160185	0.655483	0.767585	26.7729	0.395508
	0.8	0.45	1.15	1.15	5.05	1.15	15.9899	0.168055	0.16019	0.655468	0.767569	26.7719	0.395502
	0.8	0.45	1.15	1.15	5.05	1.5	15.9899	0.168058	0.16018	0.655493	0.767571	26.772	0.395502
	0.8	0.45	1.15	1.15	7.525	0.45	15.9899	0.168054	0.160196	0.655455	0.767585	26.7729	0.395504
	0.8	0.45	1.15	1.15	7.525	0.8	15.9899	0.168064	0.160183	0.655491	0.767587	26.7732	0.395508
	0.8	0.45	1.15	1.15	7.525	1.15	15.9899	0.168063	0.160175	0.655507	0.767578	26.7725	0.395505
	0.8	0.45	1.15	1.15	7.525	1.5	15.9899	0.168058	0.160181	0.655495	0.767583	26.7728	0.395502
	0.8	0.45	1.15	1.15	10	0.45	15.9899	0.168053	0.160192	0.655466	0.767567	26.7719	0.395502
	0.8	0.45	1.15	1.15	10	0.8	15.9899	0.168048	0.160209	0.65542	0.767611	26.7745	0.395512
	0.8	0.45	1.15	1.15	10	1.15	15.9899	0.168055	0.160189	0.655473	0.767571	26.772	0.395502
	0.8	0.45	1.15	1.15	10	1.5	15.9899	0.168061	0.160182	0.655491	0.767572	26.7722	0.3955
	0.8	0.45	1.15	1.5	2.575	0.45	1000	0.606734	1.32713	-0.264383	0.0001	3.73509	0.156779
	0.8	0.45	1.15	1.5	2.575	0.8	15.9899	0.16794	0.160184	0.655505	0.767494	26.7665	0.395488
	0.8	0.45	1.15	1.5	2.575	1.15	15.9899	0.168056	0.160186	0.65548	0.767567	26.7718	0.395501
	0.8	0.45	1.15	1.5	2.575	1.5	1000	-0.99835	0.22411	-0.0186747	0.0001	3.23542	0.423861
	0.8	0.45	1.15	1.5	5.05	0.45	15.9899	0.168054	0.160194	0.655456	0.767569	26.772	0.395501
	0.8	0.45	1.15	1.5	5.05	0.8	1000	0.0363307	0.802444	-0.000718143	0.457669	12.9072	0.334012
	0.8	0.45	1.15	1.5	5.05	1.15	1000	0.0347735	0.794987	-0.000702016	0.602239	18.0181	0.363052
	0.8	0.45	1.15	1.5	5.05	1.5	1000	-0.516226	0.238445	-0.137021	0.0001	5.36892	0.0001
	0.8	0.45	1.15	1.5	7.525	0.45	15.9899	0.168064	0.160178	0.6555	0.767585	26.7729	0.395505
	0.8	0.45	1.15	1.5	7.525	0.8	15.9899	0.168051	0.160184	0.655485	0.76758	26.7725	0.395504
	0.8	0.45	1.15	1.5	7.525	1.15	15.9899	0.168055	0.160189	0.655467	0.767574	26.7722	0.395504
	0.8	0.45	1.15	1.5	7.525	1.5	1000	-0.280038	0.212979	-0.0156615	0.0001	7.72159	0.0001
	0.8	0.45	1.15	1.5	10	0.45	15.9899	0.16805	0.160198	0.655451	0.76757	26.772	0.395503
	0.8	0.45	1.15	1.5	10	0.8	15.9899	0.168056	0.160185	0.655482	0.767569	26.7719	0.395502
	0.8	0.45	1.15	1.5	10	1.15	15.9899	0.16805	0.160183	0.65549	0.767596	26.7735	0.395502
	0.8	0.45	1.15	1.5	10	1.5	15.9899	0.168059	0.160181	0.655494	0.76757	26.772	0.395501
	0.8	0.45	1.5	0.45	2.575	0.45	1000	0.0332352	0.8024	-0.0206791	0.479313	13.6961	0.343363
	0.8	0.45	1.5	0.45	2.575	0.8	1000	0.0403954	0.864532	-0.0635082	0.375224	10.9517	0.30321
	0.8	0.45	1.5	0.45	2.575	1.15	1000	0.0350214	0.823081	-0.0236735	0.461238	12.8667	0.335008
	0.8	0.45	1.5	0.45	2.575	1.5	1000	0.0311839	0.813027	-0.0140172	0.575248	16.617	0.349348
	0.8	0.45	1.5	0.45	5.05	0.45	15.9899	0.168061	0.160178	0.655503	0.767581	26.7727	0.395503
	0.8	0.45	1.5	0.45	5.05	0.8	1000	0.0348948	0.79492	-0.00408966	0.385897	11.0176	0.329607
	0.8	0.45	1.5	0.45	5.05	1.15	15.9899	0.168063	0.160181	0.65549	0.767581	26.7725	0.395504
	0.8	0.45	1.5	0.45	5.05	1.5	1000	0.0341116	0.738907	-0.00817258	0.421962	10.9922	0.331668
	0.8	0.45	1.5	0.45	7.525	0.45	15.9899	0.168059	0.160176	0.655502	0.767589	26.7733	0.395507
	0.8	0.45	1.5	0.45	7.525	0.8	15.9899	0.168056	0.160185	0.655485	0.767599	26.774	0.395508
	0.8	0.45	1.5	0.45	7.525	1.15	15.9899	0.168058	0.160182	0.65549	0.767569	26.7719	0.395502
	0.8	0.45	1.5	0.45	7.525	1.5	1000	0.0282013	0.800748	-0.00958629	0.684553	21.9028	0.370819
	0.8	0.45	1.5	0.45	10	0.45	15.9899	0.168054	0.160185	0.655477	0.76762	26.7752	0.395511
	0.8	0.45	1.5	0.45	10	0.8	15.9899	0.168061	0.160177	0.655502	0.76761	26.7747	0.395509
	0.8	0.45	1.5	0.45	10	1.15	15.9899	0.168052	0.160188	0.655479	0.767594	26.7734	0.395512
	0.8	0.45	1.5	0.45	10	1.5	15.9899	0.168059	0.16018	0.655494	0.76757	26.772	0.395501
	0.8	0.45	1.5	0.8	2.575	0.45	1000	0.0226774	0.856852	-0.0485717	0.434214	11.9586	0.331924
	0.8	0.45	1.5	0.8	2.575	0.8	15.9899	0.168056	0.160193	0.655464	0.767601	26.7739	0.395509
	0.8	0.45	1.5	0.8	2.575	1.15	1000	0.0435639	0.88623	-0.0844356	0.478117	12.7348	0.358909
	0.8	0.45	1.5	0.8	2.575	1.5	1000	0.0588203	0.880563	-0.0765801	0.514867	13.8228	0.349726
	0.8	0.45	1.5	0.8	5.05	0.45	1000	0.0317	0.847081	-0.0506651	0.450228	12.2883	0.340304
	0.8	0.45	1.5	0.8	5.05	0.8	1000	0.0128925	0.846454	-0.0640553	0.425035	11.6054	0.337644
	0.8	0.45	1.5	0.8	5.05	1.15	1000	0.0321367	0.809932	-0.015941	0.441223	12.4867	0.341803
	0.8	0.45	1.5	0.8	5.05	1.5	1000	0.0458046	0.755756	-0.0351668	0.394522	10.4825	0.322009
	0.8	0.45	1.5	0.8	7.525	0.45	15.9899	0.16805	0.160195	0.655451	0.767617	26.7748	0.39551
	0.8	0.45	1.5	0.8	7.525	0.8	15.9899	0.168051	0.160194	0.65546	0.767579	26.7725	0.395505
	0.8	0.45	1.5	0.8	7.525	1.15	15.9899	0.168059	0.160182	0.655488	0.767577	26.7724	0.395507
	0.8	0.45	1.5	0.8	7.525	1.5	15.9899	0.168054	0.160187	0.655478	0.767572	26.7721	0.395504
	0.8	0.45	1.5	0.8	10	0.45	15.9899	0.168059	0.160183	0.655485	0.767591	26.7734	0.395507
	0.8	0.45	1.5	0.8	10	0.8	15.9899	0.168052	0.160196	0.655454	0.767598	26.7737	0.395506
	0.8	0.45	1.5	0.8	10	1.15	15.9899	0.168057	0.160192	0.655462	0.767592	26.7731	0.395506
	0.8	0.45	1.5	0.8	10	1.5	15.9899	0.168059	0.160181	0.655491	0.767569	26.772	0.395502
	0.8	0.45	1.5	1.15	2.575	0.45	1000	0.0273532	0.790385	-0.000261898	0.394598	11.2855	0.326236
	0.8	0.45	1.5	1.15	2.575	0.8	1000	0.13005	0.0591266	-0.103344	0.0001	5.46233	0.216262
	0.8	0.45	1.5	1.15	2.575	1.15	1000	0.029747	0.816018	-0.0268746	0.499705	13.7402	0.386399
	0.8	0.45	1.5	1.15	2.575	1.5	15.9899	0.168052	0.160189	0.655474	0.76758	26.7726	0.395504
	0.8	0.45	1.5	1.15	5.05	0.45	1000	0.0192578	0.857895	-0.0359261	0.591558	17.2231	0.370872
	0.8	0.45	1.5	1.15	5.05	0.8	15.9899	0.168055	0.160178	0.655503	0.767606	26.7744	0.39551
	0.8	0.45	1.5	1.15	5.05	1.15	1000	0.0259014	0.753276	-0.0303095	0.421183	11.3037	0.314227
	0.8	0.45	1.5	1.15	5.05	1.5	1000	0.0293122	0.757433	-0.0248049	0.389576	10.5976	0.321697
	0.8	0.45	1.5	1.15	7.525	0.45	1000	0.0696798	0.749508	-0.0181651	0.441282	11.6873	0.343832
	0.8	0.45	1.5	1.15	7.525	0.8	1000	0.0460518	0.837741	-0.0176721	0.621536	19.0758	0.368977
	0.8	0.45	1.5	1.15	7.525	1.15	1000	0.0323024	0.755765	-0.000180677	0.415626	11.5742	0.336554
	0.8	0.45	1.5	1.15	7.525	1.5	1000	0.0427596	0.787376	-0.00629423	0.473918	13.4226	0.341927
	0.8	0.45	1.5	1.15	10	0.45	15.9899	0.168053	0.160196	0.655455	0.767581	26.7727	0.395505
	0.8	0.45	1.5	1.15	10	0.8	15.9899	0.168062	0.160184	0.655483	0.767574	26.7722	0.395505
	0.8	0.45	1.5	1.15	10	1.15	15.9899	0.168061	0.160186	0.655478	0.76757	26.772	0.395502
	0.8	0.45	1.5	1.15	10	1.5	1000	0.00751316	0.839046	-0.0285044	0.542687	15.8631	0.360509
	0.8	0.45	1.5	1.5	2.575	0.45	1000	0.0373458	0.834438	-0.0431463	0.44952	12.5674	0.327329
	0.8	0.45	1.5	1.5	2.575	0.8	1000	-0.0262627	0.830061	-0.0794245	0.482955	12.4455	0.364328
	0.8	0.45	1.5	1.5	2.575	1.15	1000	0.0384488	0.841131	-0.0776809	0.451317	12.304	0.34201
	0.8	0.45	1.5	1.5	2.575	1.5	1000	-1.62746	0.137908	-0.0236721	0.0001	5.44709	0.197641
	0.8	0.45	1.5	1.5	5.05	0.45	1000	0.0100413	0.872603	-0.0540865	0.490971	13.6776	0.303518
	0.8	0.45	1.5	1.5	5.05	0.8	1000	0.042083	0.75144	-0.00624878	0.360575	10.136	0.327825
	0.8	0.45	1.5	1.5	5.05	1.15	1000	0.0261461	0.741536	-0.0113222	0.406043	10.8121	0.331988
	0.8	0.45	1.5	1.5	5.05	1.5	1000	0.0376013	0.889362	-0.0801742	0.562874	15.495	0.364766
	0.8	0.45	1.5	1.5	7.525	0.45	15.9899	0.168052	0.160198	0.655444	0.767616	26.7749	0.395507
	0.8	0.45	1.5	1.5	7.525	0.8	15.9899	0.168054	0.160193	0.65546	0.767626	26.7752	0.39551
	0.8	0.45	1.5	1.5	7.525	1.15	1000	0.0270657	0.791998	-0.0187802	0.402915	11.134	0.335559
	0.8	0.45	1.5	1.5	7.525	1.5	15.9899	0.168055	0.160189	0.655473	0.767575	26.7723	0.3955
	0.8	0.45	1.5	1.5	10	0.45	15.9899	0.168052	0.160199	0.655447	0.767576	26.7724	0.395507
	0.8	0.45	1.5	1.5	10	0.8	15.9899	0.168067	0.160178	0.655497	0.767587	26.7731	0.395507
	0.8	0.45	1.5	1.5	10	1.15	1000	0.0285955	0.80947	-0.0135772	0.402737	11.3743	0.332318
	0.8	0.45	1.5	1.5	10	1.5	15.9899	0.168059	0.160177	0.655506	0.767606	26.774	0.395508
	0.8	0.8	0.45	0.45	2.575	0.45	1000	0.504248	0.496885	-0.016043	0.0001	3.03722	0.155653
	0.8	0.8	0.45	0.45	2.575	0.8	1000	0.605994	0.514065	-0.0255887	0.0001	2.86216	0.0178171
	0.8	0.8	0.45	0.45	2.575	1.15	1000	0.477875	0.398749	-0.192205	0.0001	2.8676	0.22792
	0.8	0.8	0.45	0.45	2.575	1.5	1000	0.451101	0.436565	-0.106683	0.0001	2.79351	0.87583
	0.8	0.8	0.45	0.45	5.05	0.45	15.9899	0.168065	0.16017	0.65552	0.76759	26.7732	0.395507
	0.8	0.8	0.45	0.45	5.05	0.8	15.9899	0.16805	0.160191	0.655469	0.76757	26.7719	0.395503
	0.8	0.8	0.45	0.45	5.05	1.15	1000	0.482182	0.47415	-0.047922	0.0001	5.1441	0.0001
	0.8	0.8	0.45	0.45	5.05	1.5	1000	0.236995	0.390463	-0.114974	0.0001	5.16393	0.254297
	0.8	0.8	0.45	0.45	7.525	0.45	1000	0.499378	0.431659	-0.139965	0.1722	7.55327	0.236989
	0.8	0.8	0.45	0.45	7.525	0.8	1000	0.470119	0.497486	-0.0109781	0.112761	7.55553	0.184709
	0.8	0.8	0.45	0.45	7.525	1.15	1000	0.424843	0.482846	-0.0125476	0.0001	7.55695	0.0001
	0.8	0.8	0.45	0.45	7.525	1.5	1000	0.143945	0.428511	-0.0270787	0.0001	7.58862	0.0001
	0.8	0.8	0.45	0.45	10	0.45	1000	0.558524	0.464248	-0.102899	0.328549	10.0139	0.262333
	0.8	0.8	0.45	0.45	10	0.8	1000	0.489333	0.499858	-0.0123537	0.27619	10.0157	0.199776
	0.8	0.8	0.45	0.45	10	1.15	1000	0.282461	0.465416	-0.00407081	0.8001	9.99292	0.325665
	0.8	0.8	0.45	0.45	10	1.5	15.9899	0.168059	0.160184	0.655485	0.767579	26.7723	0.395503
	0.8	0.8	0.45	0.8	2.575	0.45	1000	0.255405	0.405916	-0.0894491	0.0001	3.18962	0.148674
	0.8	0.8	0.45	0.8	2.575	0.8	1000	0.524279	0.473446	-0.0668953	0.0001	2.89327	0.180636
	0.8	0.8	0.45	0.8	2.575	1.15	1000	0.526491	0.494855	-0.0264634	0.0001	2.82822	0.794982
	0.8	0.8	0.45	0.8	2.575	1.5	1000	0.366364	0.399542	-0.143036	0.0001	2.84231	1.09203
	0.8	0.8	0.45	0.8	5.05	0.45	1000	0.310365	0.462914	-0.00328709	0.0540961	5.10459	0.34633
	0.8	0.8	0.45	0.8	5.05	0.8	1000	0.562407	0.516057	-0.000909703	0.0001	5.162	0.0001
	0.8	0.8	0.45	0.8	5.05	1.15	1000	0.410456	0.425993	-0.110488	0.0001	5.18065	0.235354
	0.8	0.8	0.45	0.8	5.05	1.5	1000	0.381924	0.471254	-0.0198709	0.0001	5.16701	0.887568
	0.8	0.8	0.45	0.8	7.525	0.45	1000	0.403264	0.455446	-0.0516453	0.161218	7.40618	0.368559
	0.8	0.8	0.45	0.8	7.525	0.8	1000	0.526471	0.494777	-0.0266057	0.0001	7.57255	0.0001
	0.8	0.8	0.45	0.8	7.525	1.15	1000	0.424248	0.471858	-0.0315331	0.0001	7.59347	0.205526
	0.8	0.8	0.45	0.8	7.525	1.5	1000	0.0900554	0.415071	-0.0344262	0.0001	7.61424	0.263578
	0.8	0.8	0.45	0.8	10	0.45	1000	0.414396	0.388431	-0.188965	0.229623	10.0308	0.290155
	0.8	0.8	0.45	0.8	10	0.8	1000	0.400166	0.405929	-0.144237	0.8001	10.0067	0.203175
	0.8	0.8	0.45	0.8	10	1.15	1000	0.299402	0.437304	-0.0534804	0.0001	10.0372	0.0776446
	0.8	0.8	0.45	0.8	10	1.5	15.9899	0.168056	0.160186	0.65548	0.767568	26.7718	0.395501
	0.8	0.8	0.45	1.15	2.575	0.45	15.9899	0.168059	0.160183	0.655486	0.767567	26.7718	0.395502
	0.8	0.8	0.45	1.15	2.575	0.8	1000	0.271819	0.398519	-0.111894	0.0001	2.96519	0.230039
	0.8	0.8	0.45	1.15	2.575	1.15	1000	0.344334	0.432218	-0.0758306	0.0001	2.89315	0.95284
	0.8	0.8	0.45	1.15	2.575	1.5	1000	0.342367	0.438742	-0.0637785	0.0001	2.86344	1.46664
	0.8	0.8	0.45	1.15	5.05	0.45	15.9899	0.168055	0.160186	0.655482	0.767572	26.7721	0.395502
	0.8	0.8	0.45	1.15	5.05	0.8	1000	0.454088	0.470385	-0.0443794	0.0001	5.19901	0.214548
	0.8	0.8	0.45	1.15	5.05	1.15	1000	0.456622	0.487469	-0.0143254	0.0001	5.19066	0.854856
	0.8	0.8	0.45	1.15	5.05	1.5	1000	0.338926	0.449338	-0.0445419	0.0001	5.19407	1.22779
	0.8	0.8	0.45	1.15	7.525	0.45	1000	0.302814	0.363592	-0.187078	0.0346451	7.5979	0.417075
	0.8	0.8	0.45	1.15	7.525	0.8	1000	0.479123	0.482836	-0.0305528	0.0001	7.60952	0.20011
	0.8	0.8	0.45	1.15	7.525	1.15	1000	0.229266	0.352707	-0.17942	0.0001	7.63222	0.266382
	0.8	0.8	0.45	1.15	7.525	1.5	1000	0.330923	0.470656	-0.00754997	0.0001	7.61896	1.08632
	0.8	0.8	0.45	1.15	10	0.45	1000	0.318482	0.361153	-0.198841	0.159972	10.0484	0.401374
	0.8	0.8	0.45	1.15	10	0.8	1000	0.422376	0.441253	-0.0865498	0.0001	10.054	0.13131
	0.8	0.8	0.45	1.15	10	1.15	1000	0.243281	0.383303	-0.129502	0.0001	10.0716	0.248067
	0.8	0.8	0.45	1.15	10	1.5	1000	-0.0782399	0.366356	-0.0674482	0.0001	10.0856	0.426764
	0.8	0.8	0.45	1.5	2.575	0.45	1000	0.686333	0.531904	-0.0347304	0.3	2.78246	0.773734
	0.8	0.8	0.45	1.5	2.575	0.8	1000	0.679919	0.516775	-0.0620832	0.0001	2.83046	1.30902
	0.8	0.8	0.45	1.5	2.575	1.15	1000	0.0298032	0.825616	-0.0180151	0.431054	12.007	0.334904
	0.8	0.8	0.45	1.5	2.575	1.5	1000	0.0395852	0.819844	-0.011536	0.588673	17.2541	0.367356
	0.8	0.8	0.45	1.5	5.05	0.45	15.9899	0.168061	0.160186	0.65548	0.767575	26.7723	0.395501
	0.8	0.8	0.45	1.5	5.05	0.8	1000	0.138511	0.444633	-0.00160798	0.0001	5.24702	0.251433
	0.8	0.8	0.45	1.5	5.05	1.15	1000	-0.0763748	0.354245	-0.0869739	0.0001	5.2628	0.636099
	0.8	0.8	0.45	1.5	5.05	1.5	1000	-0.0766068	0.355765	-0.0845078	0.0001	5.24887	1.2568
	0.8	0.8	0.45	1.5	7.525	0.45	1000	0.149449	0.580066	-0.0313581	0.239112	7.8672	0.30495
	0.8	0.8	0.45	1.5	7.525	0.8	1000	0.230891	0.42599	-0.0532518	0.0001	7.64396	0.241917
	0.8	0.8	0.45	1.5	7.525	1.15	1000	0.330748	0.471079	-0.00684459	0.0001	7.63839	1.00841
	0.8	0.8	0.45	1.5	7.525	1.5	1000	-0.0749287	0.344692	-0.102583	0.0001	7.66023	1.06904
	0.8	0.8	0.45	1.5	10	0.45	1000	0.28346	0.387884	-0.140938	0.154647	10.065	0.510122
	0.8	0.8	0.45	1.5	10	0.8	1000	0.258508	0.415382	-0.0786535	0.0001	10.0825	0.233018
	0.8	0.8	0.45	1.5	10	1.15	1000	0.332915	0.465727	-0.0158555	0.0001	10.0834	0.926329
	0.8	0.8	0.45	1.5	10	1.5	1000	-0.0767187	0.356496	-0.083323	0.0001	10.1009	0.953517
	0.8	0.8	0.8	0.45	2.575	0.45	1000	0.670514	0.118437	-0.311869	0.0001	3.4237	0.0952754
	0.8	0.8	0.8	0.45	2.575	0.8	1000	0.592224	0.252364	-0.0422915	0.0001	3.17231	0.15
	0.8	0.8	0.8	0.45	2.575	1.15	1000	0.78671	0.267017	-0.134652	0.0001	2.92112	0.0001
	0.8	0.8	0.8	0.45	2.575	1.5	1000	0.752238	0.235472	-0.159922	0.0001	2.85094	0.634787
	0.8	0.8	0.8	0.45	5.05	0.45	15.9899	0.168053	0.160188	0.655473	0.767574	26.7723	0.3955
	0.8	0.8	0.8	0.45	5.05	0.8	1000	0.365634	0.458774	-0.0155782	0.106163	5.08103	0.33501
	0.8	0.8	0.8	0.45	5.05	1.15	1000	0.0384714	0.625575	-0.0676389	0.0465786	5.04194	0.400477
	0.8	0.8	0.8	0.45	5.05	1.5	1000	0.685113	0.235847	-0.10966	0.0001	5.16393	0.254297
	0.8	0.8	0.8	0.45	7.525	0.45	1000	0.761373	0.209645	-0.21867	0.154519	7.55941	0.15873
	0.8	0.8	0.8	0.45	7.525	0.8	1000	0.41538	0.429452	-0.0198875	0.100047	7.56457	0.107746
	0.8	0.8	0.8	0.45	7.525	1.15	15.9899	0.16806	0.160179	0.655497	0.767573	26.7722	0.395502
	0.8	0.8	0.8	0.45	7.525	1.5	1000	0.607915	0.20509	-0.116891	0.0001	7.58862	0.0001
	0.8	0.8	0.8	0.45	10	0.45	1000	0.793165	0.255659	-0.163817	0.324646	10.0183	0.195947
	0.8	0.8	0.8	0.45	10	0.8	1000	0.582916	0.0643465	-0.356151	0.244729	10.0214	0.162331
	0.8	0.8	0.8	0.45	10	1.15	15.9899	0.168057	0.160184	0.655485	0.76757	26.772	0.395501
	0.8	0.8	0.8	0.45	10	1.5	15.9899	0.168047	0.160191	0.655466	0.767577	26.7724	0.395503
	0.8	0.8	0.8	0.8	2.575	0.45	1000	0.507646	0.0143179	-0.380591	0.0001	3.47194	0.137809
	0.8	0.8	0.8	0.8	2.575	0.8	1000	0.108409	0.604893	-0.0348331	0.0001	3.45572	0.256555
	0.8	0.8	0.8	0.8	2.575	1.15	1000	0.759946	0.24447	-0.150551	0.0001	2.92119	0.382022
	0.8	0.8	0.8	0.8	2.575	1.5	1000	0.728297	0.209519	-0.186304	0.0001	2.87583	0.951161
	0.8	0.8	0.8	0.8	5.05	0.45	15.9899	0.168058	0.160183	0.655487	0.767569	26.7719	0.395502
	0.8	0.8	0.8	0.8	5.05	0.8	1000	0.194268	0.587495	-0.0640812	0.101579	5.10679	0.381202
	0.8	0.8	0.8	0.8	5.05	1.15	1000	0.741023	0.259447	-0.108575	0.0001	5.19587	0.0001
	0.8	0.8	0.8	0.8	5.05	1.5	1000	0.65197	0.141207	-0.250946	0.0001	5.20085	0.456655
	0.8	0.8	0.8	0.8	7.525	0.45	1000	0.665683	0.277956	-0.0259748	0.171408	7.35355	0.362311
	0.8	0.8	0.8	0.8	7.525	0.8	1000	0.482557	0.290845	-0.0108318	0.0883363	7.59508	0.478255
	0.8	0.8	0.8	0.8	7.525	1.15	1000	0.725137	0.311388	-0.00594636	0.0001	7.59856	0.0001
	0.8	0.8	0.8	0.8	7.525	1.5	1000	0.585238	0.167375	-0.167643	0.0001	7.61424	0.263578
	0.8	0.8	0.8	0.8	10	0.45	1000	0.727033	0.172486	-0.257423	0.206133	10.0337	0.245402
	0.8	0.8	0.8	0.8	10	0.8	1000	0.467542	0.148055	-0.167426	0.357327	9.75629	0.340708
	0.8	0.8	0.8	0.8	10	1.15	1000	0.693584	0.297784	-0.00885536	0.0001	10.0372	0.0776446
	0.8	0.8	0.8	0.8	10	1.5	1000	0.542571	0.225665	-0.0536957	0.0001	10.0554	0.233214
	0.8	0.8	0.8	1.15	2.575	0.45	1000	0.35386	0.188194	-0.0262915	0.0001	3.28796	0.165769
	0.8	0.8	0.8	1.15	2.575	0.8	1000	0.699285	0.259354	-0.0784592	0.0001	2.96519	0.230039
	0.8	0.8	0.8	1.15	2.575	1.15	1000	0.681041	0.165141	-0.229108	0.0001	2.94718	0.709904
	0.8	0.8	0.8	1.15	2.575	1.5	1000	0.670704	0.156381	-0.237204	0.0001	2.90946	1.27807
	0.8	0.8	0.8	1.15	5.05	0.45	1000	0.202456	0.542991	-0.0366924	0.0887653	5.12984	0.384613
	0.8	0.8	0.8	1.15	5.05	0.8	15.9899	0.168074	0.160272	0.655288	0.767637	26.7766	0.395519
	0.8	0.8	0.8	1.15	5.05	1.15	1000	0.701897	0.183772	-0.211499	0.0001	5.22647	0.38059
	0.8	0.8	0.8	1.15	5.05	1.5	1000	0.651374	0.140738	-0.251364	0.0001	5.21948	0.942775
	0.8	0.8	0.8	1.15	7.525	0.45	1000	0.650288	0.122392	-0.283539	0.0083553	7.60111	0.412999
	0.8	0.8	0.8	1.15	7.525	0.8	15.9899	0.168053	0.16019	0.655472	0.767578	26.7726	0.395503
	0.8	0.8	0.8	1.15	7.525	1.15	1000	0.699021	0.207832	-0.167548	0.0001	7.63222	0.266382
	0.8	0.8	0.8	1.15	7.525	1.5	1000	0.599295	0.102563	-0.284304	0.0001	7.63943	0.680233
	0.8	0.8	0.8	1.15	10	0.45	1000	0.641615	0.103432	-0.315383	0.118257	10.0517	0.349105
	0.8	0.8	0.8	1.15	10	0.8	1000	0.745324	0.30952	-0.0240015	0.0001	10.0547	0.0001
	0.8	0.8	0.8	1.15	10	1.15	1000	0.691958	0.234726	-0.116098	0.0001	10.0716	0.248067
	0.8	0.8	0.8	1.15	10	1.5	1000	0.524203	0.0550896	-0.322017	0.0001	10.0851	0.44319
	0.8	0.8	0.8	1.5	2.575	0.45	15.9899	0.168053	0.160198	0.655453	0.76758	26.7727	0.395501
	0.8	0.8	0.8	1.5	2.575	0.8	1000	0.270299	0.155952	-0.0665282	0.0001	3.04583	0.261805
	0.8	0.8	0.8	1.5	2.575	1.15	1000	0.500129	0.235295	-0.0232707	0.0001	2.94502	1.18335
	0.8	0.8	0.8	1.5	2.575	1.5	1000	0.367891	-0.0258089	-0.377955	0.0001	2.98513	1.44457
	0.8	0.8	0.8	1.5	5.05	0.45	15.9899	0.168044	0.160199	0.655448	0.767583	26.7729	0.395507
	0.8	0.8	0.8	1.5	5.05	0.8	1000	0.591731	0.209419	-0.101577	0.0001	5.24702	0.251433
	0.8	0.8	0.8	1.5	5.05	1.15	1000	0.541084	0.0651338	-0.31434	0.0001	5.2594	0.676511
	0.8	0.8	0.8	1.5	5.05	1.5	1000	0.539032	0.0638954	-0.315296	0.0001	5.2462	1.28418
	0.8	0.8	0.8	1.5	7.525	0.45	15.9899	0.168066	0.160183	0.655489	0.767582	26.7727	0.395502
	0.8	0.8	0.8	1.5	7.525	0.8	1000	0.661512	0.253372	-0.0653109	0.0001	7.64396	0.241917
	0.8	0.8	0.8	1.5	7.525	1.15	1000	0.598028	0.101695	-0.285026	0.0001	7.65894	0.583263
	0.8	0.8	0.8	1.5	7.525	1.5	1000	0.55357	0.0727786	-0.308389	0.0001	7.65725	1.11983
	0.8	0.8	0.8	1.5	10	0.45	1000	0.573779	0.073564	-0.319842	0.143421	10.0674	0.53905
	0.8	0.8	0.8	1.5	10	0.8	1000	0.683403	0.262531	-0.0628031	0.0001	10.0825	0.233018
	0.8	0.8	0.8	1.5	10	1.15	1000	0.613288	0.112321	-0.276105	0.0001	10.0965	0.513477
	0.8	0.8	0.8	1.5	10	1.5	1000	0.538038	0.0632974	-0.315756	0.0001	10.0996	0.985675
	0.8	0.8	1.15	0.45	2.575	0.45	1000	0.955886	0.00764777	-0.224829	0.0001	3.95944	0.0001
	0.8	0.8	1.15	0.45	2.575	0.8	1000	0.264005	0.436402	-0.0153051	0.0001	4.06682	0.27256
	0.8	0.8	1.15	0.45	2.575	1.15	1000	0.0931257	0.558425	-0.143225	0.0001	3.86737	0.273295
	0.8	0.8	1.15	0.45	2.575	1.5	1000	0.615361	0.164739	-0.190768	0.0001	3.44439	0.253952
	0.8	0.8	1.15	0.45	5.05	0.45	15.9899	0.168053	0.160189	0.655474	0.767582	26.7728	0.395502
	0.8	0.8	1.15	0.45	5.05	0.8	15.9899	0.168059	0.160182	0.655491	0.767571	26.772	0.395504
	0.8	0.8	1.15	0.45	5.05	1.15	15.9899	0.168062	0.160192	0.655465	0.767617	26.7751	0.395509
	0.8	0.8	1.15	0.45	5.05	1.5	15.9899	0.168056	0.16018	0.655497	0.767603	26.7743	0.395508
	0.8	0.8	1.15	0.45	7.525	0.45	1000	1.02754	-0.190267	-0.631573	0.155804	7.58593	0.165091
	0.8	0.8	1.15	0.45	7.525	0.8	1000	0.471111	0.463553	-0.117155	0.108176	7.57771	0.0872528
	0.8	0.8	1.15	0.45	7.525	1.15	15.9899	0.168058	0.16018	0.655494	0.767569	26.7719	0.395501
	0.8	0.8	1.15	0.45	7.525	1.5	15.9899	0.168062	0.16018	0.655489	0.767514	26.7686	0.395512
	0.8	0.8	1.15	0.45	10	0.45	1000	1.03524	-0.187157	-0.644105	0.324352	10.0412	0.190071
	0.8	0.8	1.15	0.45	10	0.8	1000	0.989703	-0.252875	-0.649348	0.292129	10.0295	0.0353753
	0.8	0.8	1.15	0.45	10	1.15	1000	0.224273	0.479036	-0.156759	0.204797	9.2964	0.484133
	0.8	0.8	1.15	0.45	10	1.5	1000	0.115585	0.498565	-0.142725	0.331338	9.90135	0.38431
	0.8	0.8	1.15	0.8	2.575	0.45	1000	0.920632	0.0350986	-0.125083	0.0001	3.69032	0.0001
	0.8	0.8	1.15	0.8	2.575	0.8	1000	-0.00881139	0.600806	-0.239847	0.0001	4.10975	0.272407
	0.8	0.8	1.15	0.8	2.575	1.15	1000	0.400343	0.596231	-0.02982	0.0001	3.52708	0.268088
	0.8	0.8	1.15	0.8	2.575	1.5	1000	0.977117	-0.047047	-0.336137	0.0001	3.10213	0.0001
	0.8	0.8	1.15	0.8	5.05	0.45	15.9899	0.168053	0.16018	0.655492	0.767599	26.7738	0.395512
	0.8	0.8	1.15	0.8	5.05	0.8	15.9899	0.16806	0.160184	0.655481	0.767579	26.7724	0.395504
	0.8	0.8	1.15	0.8	5.05	1.15	15.9899	0.16806	0.160182	0.655489	0.767573	26.7722	0.3955
	0.8	0.8	1.15	0.8	5.05	1.5	15.9899	0.168056	0.160182	0.655491	0.767577	26.7725	0.395504
	0.8	0.8	1.15	0.8	7.525	0.45	15.9899	0.168067	0.16017	0.655524	0.767605	26.7741	0.395508
	0.8	0.8	1.15	0.8	7.525	0.8	1000	0.162971	0.524217	-0.171352	0.215703	7.60023	0.445628
	0.8	0.8	1.15	0.8	7.525	1.15	15.9899	0.168057	0.160186	0.655481	0.767594	26.7735	0.395503
	0.8	0.8	1.15	0.8	7.525	1.5	15.9899	0.16806	0.160181	0.655491	0.767569	26.7719	0.395502
	0.8	0.8	1.15	0.8	10	0.45	1000	1.01773	-0.192781	-0.615234	0.202477	10.0442	0.212272
	0.8	0.8	1.15	0.8	10	0.8	1000	0.862571	-0.00529429	-0.119521	0.23726	9.5541	0.520908
	0.8	0.8	1.15	0.8	10	1.15	1000	0.791999	0.0959643	-0.00533573	0.257331	10.0307	0.10147
	0.8	0.8	1.15	0.8	10	1.5	15.9899	0.168045	0.160193	0.655465	0.767598	26.7735	0.395506
	0.8	0.8	1.15	1.15	2.575	0.45	1000	-0.0211492	0.472649	-0.119162	0.0001	4.35638	0.397808
	0.8	0.8	1.15	1.15	2.575	0.8	1000	0.335039	0.579249	-0.0528603	0.0001	3.71621	0.255036
	0.8	0.8	1.15	1.15	2.575	1.15	1000	0.947646	0.044564	-0.156134	0.0001	3.10503	0.0001
	0.8	0.8	1.15	1.15	2.575	1.5	1000	0.993923	-0.217965	-0.600086	0.0001	3.13213	0.365671
	0.8	0.8	1.15	1.15	5.05	0.45	1000	0.238197	0.440065	-0.0669879	0.126851	5.09883	0.449531
	0.8	0.8	1.15	1.15	5.05	0.8	1000	0.112966	0.520816	-0.13514	0.120432	5.07659	0.400638
	0.8	0.8	1.15	1.15	5.05	1.15	15.9899	0.168064	0.160171	0.655515	0.767607	26.7743	0.39551
	0.8	0.8	1.15	1.15	5.05	1.5	1000	0.969499	-0.110358	-0.40839	0.0001	5.30349	0.0001
	0.8	0.8	1.15	1.15	7.525	0.45	1000	0.947334	0.0256183	-0.18366	0.0001	7.60851	0.384662
	0.8	0.8	1.15	1.15	7.525	0.8	15.9899	0.168052	0.160188	0.655474	0.767572	26.7721	0.395505
	0.8	0.8	1.15	1.15	7.525	1.15	15.9899	0.168053	0.160185	0.655481	0.767559	26.7712	0.395508
	0.8	0.8	1.15	1.15	7.525	1.5	1000	0.941335	-0.00531959	-0.214309	0.0001	7.67371	0.0001
	0.8	0.8	1.15	1.15	10	0.45	1000	0.999101	-0.222369	-0.619443	0.102717	10.06	0.300761
	0.8	0.8	1.15	1.15	10	0.8	1000	-0.241496	0.573702	-0.207194	0.381682	10.8382	0.384744
	0.8	0.8	1.15	1.15	10	1.15	1000	0.229081	0.447608	-0.0612796	0.334447	9.93858	0.387284
	0.8	0.8	1.15	1.15	10	1.5	1000	0.924157	0.0357058	-0.129087	0.0001	10.0993	0.0001
	0.8	0.8	1.15	1.5	2.575	0.45	1000	0.340107	0.611026	-0.184386	0.0001	4.53195	0.0443974
	0.8	0.8	1.15	1.5	2.575	0.8	1000	0.874474	-0.035267	-0.165141	0.0001	3.09965	0.0001
	0.8	0.8	1.15	1.5	2.575	1.15	1000	0.930902	-0.369357	-0.717408	0.0001	3.16273	0.209105
	0.8	0.8	1.15	1.5	2.575	1.5	1000	0.950603	-0.33035	-0.688779	0.0001	3.10293	0.979493
	0.8	0.8	1.15	1.5	5.05	0.45	15.9899	0.168058	0.160185	0.655482	0.767568	26.7719	0.395502
	0.8	0.8	1.15	1.5	5.05	0.8	15.9899	0.168052	0.160189	0.655472	0.767579	26.7725	0.395505
	0.8	0.8	1.15	1.5	5.05	1.15	1000	0.943387	-0.0786113	-0.320529	0.0001	5.31634	0.0001
	0.8	0.8	1.15	1.5	5.05	1.5	1000	0.97286	-0.278786	-0.649193	0.0001	5.32483	0.477602
	0.8	0.8	1.15	1.5	7.525	0.45	15.9899	0.168058	0.160178	0.655497	0.767577	26.7723	0.395503
	0.8	0.8	1.15	1.5	7.525	0.8	15.9899	0.168056	0.160186	0.655481	0.767569	26.772	0.395503
	0.8	0.8	1.15	1.5	7.525	1.15	1000	0.932822	0.0455717	-0.129063	0.0001	7.68712	0.0001
	0.8	0.8	1.15	1.5	7.525	1.5	1000	0.975	-0.273255	-0.644829	0.0001	7.71282	0.174745
	0.8	0.8	1.15	1.5	10	0.45	1000	0.975102	-0.282833	-0.66292	0.0650769	10.0789	0.471454
	0.8	0.8	1.15	1.5	10	0.8	1000	0.47413	0.489569	-0.163091	0.34264	10.2492	0.300234
	0.8	0.8	1.15	1.5	10	1.15	1000	0.926802	0.0958389	-0.0488249	0.0001	10.1128	0.0001
	0.8	0.8	1.15	1.5	10	1.5	1000	0.97261	-0.278444	-0.648315	0.0001	10.1399	0.0001
	0.8	0.8	1.5	0.45	2.575	0.45	1000	1.09839	-0.214228	-0.301024	0.0001	6.26907	0.0001
	0.8	0.8	1.5	0.45	2.575	0.8	1000	-0.168023	0.593395	-0.0331159	0.106491	4.8371	0.271505
	0.8	0.8	1.5	0.45	2.575	1.15	1000	-0.174384	0.334856	-0.118759	0.0001	3.33196	0.369096
	0.8	0.8	1.5	0.45	2.575	1.5	1000	0.0136201	0.860482	-0.0364883	0.498245	13.9997	0.358333
	0.8	0.8	1.5	0.45	5.05	0.45	15.9899	0.168062	0.16019	0.655466	0.767582	26.7728	0.395505
	0.8	0.8	1.5	0.45	5.05	0.8	15.9899	0.168066	0.160168	0.655525	0.767614	26.7747	0.395513
	0.8	0.8	1.5	0.45	5.05	1.15	1000	0.025351	0.801575	-0.0162462	0.562634	16.0968	0.352673
	0.8	0.8	1.5	0.45	5.05	1.5	15.9899	0.168049	0.160195	0.655454	0.767596	26.7738	0.395507
	0.8	0.8	1.5	0.45	7.525	0.45	1000	1.08462	-0.14647	-0.21431	0.184223	7.62614	0.2613
	0.8	0.8	1.5	0.45	7.525	0.8	1000	1.08824	-0.190416	-0.247146	0.125555	7.59248	0.183245
	0.8	0.8	1.5	0.45	7.525	1.15	1000	0.599662	0.497487	-0.0563113	0.227556	7.4597	0.326927
	0.8	0.8	1.5	0.45	7.525	1.5	1000	-0.123321	0.6075	-0.459052	0.0791367	7.3601	0.433039
	0.8	0.8	1.5	0.45	10	0.45	1000	1.23441	-0.638081	-1.11603	0.332966	10.1101	0.263906
	0.8	0.8	1.5	0.45	10	0.8	1000	0.519345	0.606772	-0.315691	0.31667	10.0803	0.211604
	0.8	0.8	1.5	0.45	10	1.15	1000	0.355903	0.511146	-0.314777	0.284776	10.1578	0.415663
	0.8	0.8	1.5	0.45	10	1.5	15.9899	0.168049	0.160205	0.655431	0.767599	26.7738	0.395513
	0.8	0.8	1.5	0.8	2.575	0.45	15.9899	0.168054	0.160183	0.655484	0.767579	26.7726	0.395504
	0.8	0.8	1.5	0.8	2.575	0.8	1000	0.892963	0.164886	-0.0620731	0.0001	4.26372	0.237082
	0.8	0.8	1.5	0.8	2.575	1.15	1000	0.0339606	0.803754	-0.00327349	0.638289	19.7396	0.371077
	0.8	0.8	1.5	0.8	2.575	1.5	1000	-0.148043	0.264137	-0.102166	0.0001	4.30981	0.287721
	0.8	0.8	1.5	0.8	5.05	0.45	15.9899	0.168039	0.160207	0.655426	0.767591	26.7733	0.395506
	0.8	0.8	1.5	0.8	5.05	0.8	1000	0.02994	0.821276	-0.0140262	0.615455	18.6824	0.36994
	0.8	0.8	1.5	0.8	5.05	1.15	15.9899	0.168052	0.160189	0.655471	0.767572	26.7722	0.395504
	0.8	0.8	1.5	0.8	5.05	1.5	15.9899	0.168044	0.160203	0.655433	0.767595	26.7737	0.395507
	0.8	0.8	1.5	0.8	7.525	0.45	1000	1.0868	-0.188769	-0.239468	0.043074	6.02597	0.0001
	0.8	0.8	1.5	0.8	7.525	0.8	1000	1.04851	-0.153922	-0.0629958	0.161394	7.28437	0.818311
	0.8	0.8	1.5	0.8	7.525	1.15	15.9899	0.168058	0.160182	0.655492	0.76757	26.7719	0.395503
	0.8	0.8	1.5	0.8	7.525	1.5	1000	0.583744	0.416253	-0.153363	0.197292	7.33245	0.413106
	0.8	0.8	1.5	0.8	10	0.45	1000	1.1258	-0.289123	-0.46323	0.254845	10.0643	0.309882
	0.8	0.8	1.5	0.8	10	0.8	1000	1.17066	-0.533534	-0.778613	0.142941	8.07727	0.109507
	0.8	0.8	1.5	0.8	10	1.15	1000	0.183216	0.352665	-0.0529929	0.401346	9.26207	0.564545
	0.8	0.8	1.5	0.8	10	1.5	15.9899	0.168059	0.160184	0.655484	0.76757	26.772	0.395504
	0.8	0.8	1.5	1.15	2.575	0.45	15.9899	0.168056	0.160179	0.655496	0.767575	26.7724	0.395502
	0.8	0.8	1.5	1.15	2.575	0.8	1000	0.032389	0.819524	-0.0094621	0.715132	23.4354	0.392933
	0.8	0.8	1.5	1.15	2.575	1.15	1000	0.0441418	0.402891	-0.336813	0.0001	4.25734	0.282913
	0.8	0.8	1.5	1.15	2.575	1.5	1000	0.408861	1.0498	-0.138312	0.0001	4.63776	0.277674
	0.8	0.8	1.5	1.15	5.05	0.45	1000	0.0242433	0.758634	-0.00694298	0.580342	16.2195	0.375452
	0.8	0.8	1.5	1.15	5.05	0.8	15.9899	0.168065	0.16018	0.655493	0.767577	26.7724	0.395505
	0.8	0.8	1.5	1.15	5.05	1.15	15.9899	0.168054	0.16019	0.655472	0.767567	26.7718	0.395501
	0.8	0.8	1.5	1.15	5.05	1.5	15.9899	0.168052	0.160192	0.65546	0.767576	26.7724	0.395505
	0.8	0.8	1.5	1.15	7.525	0.45	1000	1.18606	-0.515726	-0.832552	0.0564313	7.64947	0.39049
	0.8	0.8	1.5	1.15	7.525	0.8	1000	-0.054423	0.279884	-0.0146566	0.171962	7.48095	0.330233
	0.8	0.8	1.5	1.15	7.525	1.15	1000	0.188095	0.53204	-0.277489	0.123274	7.35044	0.407032
	0.8	0.8	1.5	1.15	7.525	1.5	15.9899	0.168058	0.160187	0.65548	0.76757	26.772	0.395501
	0.8	0.8	1.5	1.15	10	0.45	1000	1.1851	-0.505152	-0.824344	0.186214	10.0809	0.378808
	0.8	0.8	1.5	1.15	10	0.8	1000	0.0318142	0.520789	-0.287683	0.170863	7.84538	0.0332847
	0.8	0.8	1.5	1.15	10	1.15	15.9899	0.168053	0.160191	0.655463	0.767604	26.7742	0.395502
	0.8	0.8	1.5	1.15	10	1.5	15.9899	0.16806	0.16018	0.655496	0.76757	26.772	0.395501
	0.8	0.8	1.5	1.5	2.575	0.45	1000	0.0702497	0.397968	-0.124507	0.0001	4.04298	0.256813
	0.8	0.8	1.5	1.5	2.575	0.8	1000	0.165957	0.415355	-0.0320673	0.0001	4.01478	0.280656
	0.8	0.8	1.5	1.5	2.575	1.15	1000	0.36332	0.891118	-0.107421	0.0001	4.29465	0.286311
	0.8	0.8	1.5	1.5	2.575	1.5	1000	1.05714	-0.110441	-0.0661968	0.0001	3.35102	0.0001
	0.8	0.8	1.5	1.5	5.05	0.45	15.9899	0.168052	0.160189	0.655472	0.767613	26.7746	0.395505
	0.8	0.8	1.5	1.5	5.05	0.8	15.9899	0.168057	0.160185	0.655482	0.767574	26.7722	0.395503
	0.8	0.8	1.5	1.5	5.05	1.15	15.9899	0.168049	0.160188	0.655473	0.76758	26.7726	0.395502
	0.8	0.8	1.5	1.5	5.05	1.5	15.9899	0.168062	0.160176	0.655503	0.767578	26.7725	0.395503
	0.8	0.8	1.5	1.5	7.525	0.45	15.9899	0.168062	0.160185	0.655481	0.767578	26.7725	0.3955
	0.8	0.8	1.5	1.5	7.525	0.8	1000	-0.213817	0.633288	-0.542272	0.0897709	7.3838	0.435321
	0.8	0.8	1.5	1.5	7.525	1.15	15.9899	0.168051	0.160196	0.655461	0.767589	26.7731	0.395505
	0.8	0.8	1.5	1.5	7.525	1.5	15.9899	0.168059	0.16019	0.655464	0.767593	26.7734	0.395505
	0.8	0.8	1.5	1.5	10	0.45	1000	1.21351	-0.632746	-1.009	0.139387	10.1051	0.452687
	0.8	0.8	1.5	1.5	10	0.8	15.9899	0.168056	0.160187	0.655479	0.767577	26.7724	0.395503
	0.8	0.8	1.5	1.5	10	1.15	15.9899	0.168059	0.160179	0.6555	0.767574	26.7722	0.395502
	0.8	0.8	1.5	1.5	10	1.5	1000	-0.208976	0.574665	-0.091482	0.31548	10.885	0.536711
	0.8	1.15	0.45	0.45	2.575	0.45	1000	0.678317	0.950043	-0.0458622	0.0001	2.98625	0.16133
	0.8	1.15	0.45	0.45	2.575	0.8	1000	0.724215	0.944645	-0.078285	0.0001	2.86216	0.0178171
	0.8	1.15	0.45	0.45	2.575	1.15	1000	0.661337	0.857923	-0.287633	0.0001	2.8676	0.22792
	0.8	1.15	0.45	0.45	2.575	1.5	1000	0.665636	0.919514	-0.122294	0.0001	2.76674	0.988176
	0.8	1.15	0.45	0.45	5.05	0.45	1000	0.599059	0.954207	-0.00203971	0.1001	5.05223	0.26377
	0.8	1.15	0.45	0.45	5.05	0.8	1000	0.605676	0.953943	-0.00647846	0.1001	5.09258	0.270248
	0.8	1.15	0.45	0.45	5.05	1.15	1000	0.671115	0.93434	-0.0844986	0.0001	5.13606	0.148479
	0.8	1.15	0.45	0.45	5.05	1.5	1000	0.639709	0.937672	-0.0654207	0.0001	5.12846	0.762892
	0.8	1.15	0.45	0.45	7.525	0.45	1000	0.684987	0.91306	-0.148529	0.172141	7.55208	0.238959
	0.8	1.15	0.45	0.45	7.525	0.8	1000	0.727144	0.964036	-0.0273587	0.147335	7.55362	0.0001
	0.8	1.15	0.45	0.45	7.525	1.15	1000	0.605472	0.904658	-0.140838	0.0001	7.55695	0.0001
	0.8	1.15	0.45	0.45	7.525	1.5	1000	0.631562	0.944976	-0.0461063	0.0001	7.56861	0.672205
	0.8	1.15	0.45	0.45	10	0.45	1000	0.711971	0.931598	-0.109171	0.328401	10.0132	0.260441
	0.8	1.15	0.45	0.45	10	0.8	1000	0.64935	0.932827	-0.0840133	0.276742	10.0154	0.206464
	0.8	1.15	0.45	0.45	10	1.15	1000	0.641393	0.949355	-0.0372502	0.4001	10.0087	0.452253
	0.8	1.15	0.45	0.45	10	1.5	1000	0.693029	0.968923	-0.00618377	0.0001	10.0258	0.80336
	0.8	1.15	0.45	0.8	2.575	0.45	1000	0.717562	0.970998	-0.003523	0.0001	2.90319	0.0001
	0.8	1.15	0.45	0.8	2.575	0.8	1000	0.677976	0.910965	-0.1503	0.0001	2.89327	0.180636
	0.8	1.15	0.45	0.8	2.575	1.15	1000	0.675143	0.924997	-0.111173	0.0001	2.82822	0.794982
	0.8	1.15	0.45	0.8	2.575	1.5	1000	0.637014	0.904968	-0.150716	0.0001	2.80858	1.23378
	0.8	1.15	0.45	0.8	5.05	0.45	1000	0.620114	0.951248	-0.0190367	0.0146375	5.1213	0.314207
	0.8	1.15	0.45	0.8	5.05	0.8	1000	0.702513	0.953909	-0.0437807	0.0001	5.15876	0.0659351
	0.8	1.15	0.45	0.8	5.05	1.15	1000	0.610147	0.868757	-0.237865	0.0001	5.18065	0.235354
	0.8	1.15	0.45	0.8	5.05	1.5	1000	0.576871	0.891485	-0.166284	0.0001	5.16701	0.887568
	0.8	1.15	0.45	0.8	7.525	0.45	1000	0.686959	0.963856	-0.0105051	0.115138	7.47733	0.393317
	0.8	1.15	0.45	0.8	7.525	0.8	1000	0.675147	0.924944	-0.111316	0.0001	7.57255	0.0001
	0.8	1.15	0.45	0.8	7.525	1.15	1000	0.608341	0.898302	-0.158488	0.0001	7.59347	0.205526
	0.8	1.15	0.45	0.8	7.525	1.5	1000	0.575753	0.916603	-0.102498	0.0001	7.59399	0.790733
	0.8	1.15	0.45	0.8	10	0.45	1000	0.70822	0.969255	-0.00557909	0.227615	10.029	0.282034
	0.8	1.15	0.45	0.8	10	0.8	1000	0.698618	0.968256	-0.0036704	0.4001	10.0215	0.419409
	0.8	1.15	0.45	0.8	10	1.15	1000	0.655049	0.952576	-0.0316473	0.0001	10.0372	0.477645
	0.8	1.15	0.45	0.8	10	1.5	1000	0.673094	0.9592	-0.0261219	0.0001	10.0421	0.932856
	0.8	1.15	0.45	1.15	2.575	0.45	1000	0.605741	0.915794	-0.111995	0.0001	2.95535	0.0001
	0.8	1.15	0.45	1.15	2.575	0.8	1000	0.651672	0.944415	-0.0514405	0.0001	2.86683	0.690118
	0.8	1.15	0.45	1.15	2.575	1.15	1000	0.580019	0.880202	-0.196832	0.0001	2.88252	1.00063
	0.8	1.15	0.45	1.15	2.575	1.5	1000	0.676537	0.964964	-0.00555367	0.0001	2.81231	1.67616
	0.8	1.15	0.45	1.15	5.05	0.45	1000	0.688459	0.96281	-0.014658	0.0001	5.17578	0.0001
	0.8	1.15	0.45	1.15	5.05	0.8	1000	0.63027	0.901403	-0.157819	0.0001	5.19901	0.214548
	0.8	1.15	0.45	1.15	5.05	1.15	1000	0.627608	0.911978	-0.128794	0.0001	5.19066	0.854856
	0.8	1.15	0.45	1.15	5.05	1.5	1000	0.66422	0.957752	-0.0208095	0.0001	5.17159	1.48011
	0.8	1.15	0.45	1.15	7.525	0.45	1000	0.673701	0.957669	-0.0232841	0.0391145	7.59438	0.422627
	0.8	1.15	0.45	1.15	7.525	0.8	1000	0.644956	0.912119	-0.134464	0.0001	7.60952	0.20011
	0.8	1.15	0.45	1.15	7.525	1.15	1000	0.643109	0.931251	-0.0830979	0.0001	7.61152	0.799146
	0.8	1.15	0.45	1.15	7.525	1.5	1000	0.637506	0.944828	-0.0470491	0.0001	7.60758	1.31224
	0.8	1.15	0.45	1.15	10	0.45	1000	0.680698	0.95875	-0.0230658	0.160999	10.0464	0.402016
	0.8	1.15	0.45	1.15	10	0.8	1000	0.614926	0.879632	-0.210478	0.0001	10.054	0.13131
	0.8	1.15	0.45	1.15	10	1.15	1000	0.643391	0.937838	-0.0660373	0.0001	10.0608	0.744201
	0.8	1.15	0.45	1.15	10	1.5	1000	0.636131	0.947724	-0.0407329	0.0001	10.0601	1.22709
	0.8	1.15	0.45	1.5	2.575	0.45	1000	0.771738	0.96187	-0.0540156	0.3	2.78246	0.773734
	0.8	1.15	0.45	1.5	2.575	0.8	1000	0.770144	0.951254	-0.0824566	0.0001	2.83046	1.30902
	0.8	1.15	0.45	1.5	2.575	1.15	1000	0.77443	0.979787	-0.00601436	0.0001	2.82764	1.70862
	0.8	1.15	0.45	1.5	2.575	1.5	1000	0.677168	0.96162	-0.020719	0.0001	2.84863	1.98341
	0.8	1.15	0.45	1.5	5.05	0.45	1000	0.660016	0.956846	-0.026997	0.0001	5.19962	0.424267
	0.8	1.15	0.45	1.5	5.05	0.8	1000	0.587496	0.924954	-0.0851946	0.0001	5.21327	0.7543
	0.8	1.15	0.45	1.5	5.05	1.15	1000	0.613099	0.935173	-0.0657366	0.0001	5.20562	1.31523
	0.8	1.15	0.45	1.5	5.05	1.5	1000	0.589956	0.92318	-0.0896864	0.0001	5.20346	1.72268
	0.8	1.15	0.45	1.5	7.525	0.45	1000	0.664874	0.962325	-0.0104552	0.0001	7.61524	0.398319
	0.8	1.15	0.45	1.5	7.525	0.8	1000	0.63014	0.939643	-0.058122	0.0001	7.62776	0.725752
	0.8	1.15	0.45	1.5	7.525	1.15	1000	0.647717	0.951296	-0.0334504	0.0001	7.62584	1.26801
	0.8	1.15	0.45	1.5	7.525	1.5	1000	0.599894	0.92712	-0.0822451	0.0001	7.62777	1.62105
	0.8	1.15	0.45	1.5	10	0.45	1000	0.63893	0.936972	-0.0677694	0.162651	10.0625	0.512294
	0.8	1.15	0.45	1.5	10	0.8	1000	0.643358	0.943751	-0.0509369	0.0001	10.0737	0.699054
	0.8	1.15	0.45	1.5	10	1.15	1000	0.660421	0.958443	-0.0185229	0.0001	10.0739	1.2234
	0.8	1.15	0.45	1.5	10	1.5	1000	0.589272	0.922915	-0.0901825	0.0001	10.0776	1.52315
	0.8	1.15	0.8	0.45	2.575	0.45	1000	0.854198	0.74385	-0.252755	0.0001	3.43446	0.0811636
	0.8	1.15	0.8	0.45	2.575	0.8	1000	0.785579	0.677613	-0.381723	0.0001	3.38272	0.0731659
	0.8	1.15	0.8	0.45	2.575	1.15	1000	0.870741	0.843469	-0.0147371	0.0001	2.92112	0.0001
	0.8	1.15	0.8	0.45	2.575	1.5	1000	0.868198	0.79393	-0.13554	0.0001	2.87277	0.543134
	0.8	1.15	0.8	0.45	5.05	0.45	1000	0.495147	0.773255	-0.00499163	0.0409489	4.96542	0.289562
	0.8	1.15	0.8	0.45	5.05	0.8	1000	0.491329	0.773153	-0.00601747	0.0473435	5.01973	0.290222
	0.8	1.15	0.8	0.45	5.05	1.15	1000	0.66285	0.790919	-0.0441432	0.0326665	5.11765	0.314695
	0.8	1.15	0.8	0.45	5.05	1.5	1000	0.840348	0.817477	-0.0581269	0.0001	5.16393	0.254297
	0.8	1.15	0.8	0.45	7.525	0.45	1000	0.878357	0.7937	-0.144799	0.164041	7.55996	0.208342
	0.8	1.15	0.8	0.45	7.525	0.8	1000	0.816586	0.707984	-0.322457	0.0961687	7.56213	0.122122
	0.8	1.15	0.8	0.45	7.525	1.15	1000	0.692033	0.810564	-0.0117178	0.2001	7.52752	0.0726485
	0.8	1.15	0.8	0.45	7.525	1.5	1000	0.818827	0.78621	-0.123964	0.0001	7.58862	0.0001
	0.8	1.15	0.8	0.45	10	0.45	1000	0.883465	0.80686	-0.11615	0.32655	10.0196	0.228428
	0.8	1.15	0.8	0.45	10	0.8	1000	0.837066	0.728627	-0.281996	0.275273	10.0201	0.144553
	0.8	1.15	0.8	0.45	10	1.15	1000	0.747873	0.806968	-0.0407163	0.309023	9.90818	0.459372
	0.8	1.15	0.8	0.45	10	1.5	1000	0.804734	0.823902	-0.023287	0.0001	10.0322	0.20084
	0.8	1.15	0.8	0.8	2.575	0.45	1000	0.810033	0.703607	-0.325608	0.0001	3.41616	0.102247
	0.8	1.15	0.8	0.8	2.575	0.8	1000	0.722229	0.76256	-0.145295	0.0001	3.20279	0.157823
	0.8	1.15	0.8	0.8	2.575	1.15	1000	0.870241	0.797741	-0.127597	0.0001	2.94632	0.270446
	0.8	1.15	0.8	0.8	2.575	1.5	1000	0.861891	0.783123	-0.1579	0.0001	2.89052	0.88941
	0.8	1.15	0.8	0.8	5.05	0.45	1000	0.788654	0.820604	-0.0215624	0.0528879	5.10092	0.345535
	0.8	1.15	0.8	0.8	5.05	0.8	1000	0.700886	0.769772	-0.111429	0.0535245	5.13044	0.30534
	0.8	1.15	0.8	0.8	5.05	1.15	1000	0.855753	0.837389	-0.0185324	0.0001	5.19587	0.0001
	0.8	1.15	0.8	0.8	5.05	1.5	1000	0.842492	0.756077	-0.212686	0.0001	5.20207	0.441075
	0.8	1.15	0.8	0.8	7.525	0.45	1000	0.825838	0.827521	-0.0259521	0.129285	7.33628	0.373245
	0.8	1.15	0.8	0.8	7.525	0.8	1000	0.705141	0.764229	-0.129765	0.128279	7.53078	0.0462895
	0.8	1.15	0.8	0.8	7.525	1.15	1000	0.392984	0.746914	-0.057483	0.0830767	7.50027	0.27859
	0.8	1.15	0.8	0.8	7.525	1.5	1000	0.816344	0.761833	-0.183399	0.0001	7.61424	0.263578
	0.8	1.15	0.8	0.8	10	0.45	1000	0.870356	0.770322	-0.197607	0.213727	10.0339	0.247083
	0.8	1.15	0.8	0.8	10	0.8	1000	0.77116	0.772019	-0.140414	0.320886	9.7927	0.409981
	0.8	1.15	0.8	0.8	10	1.15	1000	0.835692	0.831305	-0.0208189	0.0001	10.0372	0.0001
	0.8	1.15	0.8	0.8	10	1.5	1000	0.792796	0.779347	-0.128257	0.0001	10.0554	0.233214
	0.8	1.15	0.8	1.15	2.575	0.45	1000	0.726673	0.776022	-0.10503	0.0001	3.20567	0.17092
	0.8	1.15	0.8	1.15	2.575	0.8	1000	0.841838	0.832471	-0.0216181	0.0001	2.96519	0.230039
	0.8	1.15	0.8	1.15	2.575	1.15	1000	0.849731	0.765311	-0.194178	0.0001	2.9549	0.6752
	0.8	1.15	0.8	1.15	2.575	1.5	1000	0.847135	0.7619	-0.201039	0.0001	2.9142	1.25865
	0.8	1.15	0.8	1.15	5.05	0.45	1000	0.721811	0.806608	-0.0239291	0.0337526	5.14983	0.318898
	0.8	1.15	0.8	1.15	5.05	0.8	1000	0.569852	0.778395	-0.0436985	0.00793707	5.16482	0.289411
	0.8	1.15	0.8	1.15	5.05	1.15	1000	0.855042	0.772683	-0.179253	0.0001	5.23142	0.315051
	0.8	1.15	0.8	1.15	5.05	1.5	1000	0.842346	0.755899	-0.213041	0.0001	5.22053	0.930918
	0.8	1.15	0.8	1.15	7.525	0.45	1000	0.845564	0.748687	-0.234221	0.0155112	7.60116	0.405593
	0.8	1.15	0.8	1.15	7.525	0.8	1000	0.402526	0.743447	-0.062467	0.0359606	7.51993	0.283637
	0.8	1.15	0.8	1.15	7.525	1.15	1000	0.848758	0.804092	-0.0968122	0.0001	7.63222	0.266382
	0.8	1.15	0.8	1.15	7.525	1.5	1000	0.829889	0.741756	-0.240958	0.0001	7.63785	0.711606
	0.8	1.15	0.8	1.15	10	0.45	1000	0.851909	0.75138	-0.231896	0.137686	10.0509	0.368954
	0.8	1.15	0.8	1.15	10	0.8	1000	0.6215	0.753167	-0.13369	0.8001	10.0195	0.13174
	0.8	1.15	0.8	1.15	10	1.15	1000	0.842759	0.817915	-0.0585197	0.0001	10.0716	0.248067
	0.8	1.15	0.8	1.15	10	1.5	1000	0.813072	0.72521	-0.272921	0.0001	10.0818	0.547691
	0.8	1.15	0.8	1.5	2.575	0.45	1000	0.727212	0.805245	-0.0428103	0.0001	3.00699	0.0546404
	0.8	1.15	0.8	1.5	2.575	0.8	1000	0.693397	0.66211	-0.37527	0.0001	3.04583	0.261805
	0.8	1.15	0.8	1.5	2.575	1.15	1000	0.75027	0.678423	-0.358738	0.0001	2.98867	0.988014
	0.8	1.15	0.8	1.5	2.575	1.5	1000	0.782045	0.699847	-0.320331	0.0001	2.95194	1.57557
	0.8	1.15	0.8	1.5	5.05	0.45	1000	0.480657	0.741816	-0.0897997	0.0132066	5.18757	0.297634
	0.8	1.15	0.8	1.5	5.05	0.8	1000	0.812695	0.784608	-0.124769	0.0001	5.24702	0.251433
	0.8	1.15	0.8	1.5	5.05	1.15	1000	0.816737	0.728611	-0.266415	0.0001	5.2527	0.756016
	0.8	1.15	0.8	1.5	5.05	1.5	1000	0.816288	0.728189	-0.267225	0.0001	5.24038	1.34393
	0.8	1.15	0.8	1.5	7.525	0.45	1000	0.700758	0.811238	-0.0165301	0.2001	7.59707	0.070822
	0.8	1.15	0.8	1.5	7.525	0.8	1000	0.830188	0.822666	-0.0392226	0.0001	7.64396	0.241917
	0.8	1.15	0.8	1.5	7.525	1.15	1000	0.829594	0.741443	-0.24157	0.0001	7.6573	0.617118
	0.8	1.15	0.8	1.5	7.525	1.5	1000	0.819491	0.731236	-0.261371	0.0001	7.65384	1.17779
	0.8	1.15	0.8	1.5	10	0.45	1000	0.821553	0.725146	-0.27943	0.13243	10.0678	0.514268
	0.8	1.15	0.8	1.5	10	0.8	1000	0.836177	0.831619	-0.0203202	0.0001	10.0825	0.233018
	0.8	1.15	0.8	1.5	10	1.15	1000	0.833172	0.745302	-0.234009	0.0001	10.0958	0.534019
	0.8	1.15	0.8	1.5	10	1.5	1000	0.816071	0.727985	-0.267615	0.0001	10.0966	1.05968
	0.8	1.15	1.15	0.45	2.575	0.45	1000	1.08428	0.480365	-0.614201	0.0001	4.97809	0.0249069
	0.8	1.15	1.15	0.45	2.575	0.8	1000	0.926896	0.700645	-0.00560643	0.0001	3.82769	0.4001
	0.8	1.15	1.15	0.45	2.575	1.15	1000	0.631744	0.662025	-0.0859439	0.0001	3.37688	0.267324
	0.8	1.15	1.15	0.45	2.575	1.5	1000	0.894771	0.678828	-0.0145986	0.0001	3.25985	0.0001
	0.8	1.15	1.15	0.45	5.05	0.45	15.9899	0.168058	0.160182	0.655489	0.767568	26.7719	0.395502
	0.8	1.15	1.15	0.45	5.05	0.8	15.9899	0.168052	0.160192	0.655466	0.767587	26.7732	0.39551
	0.8	1.15	1.15	0.45	5.05	1.15	15.9899	0.168059	0.160181	0.655491	0.767569	26.7719	0.395502
	0.8	1.15	1.15	0.45	5.05	1.5	15.9899	0.168059	0.160179	0.655494	0.76759	26.773	0.395507
	0.8	1.15	1.15	0.45	7.525	0.45	1000	1.03752	0.609726	-0.291056	0.17601	7.58949	0.252912
	0.8	1.15	1.15	0.45	7.525	0.8	1000	1.07754	0.481127	-0.603042	0.108736	7.57879	0.148614
	0.8	1.15	1.15	0.45	7.525	1.15	1000	0.906262	0.644146	-0.0648918	0.104828	7.43852	0.339892
	0.8	1.15	1.15	0.45	7.525	1.5	1000	0.819962	0.631501	-0.0384363	0.150357	7.44354	0.292723
	0.8	1.15	1.15	0.45	10	0.45	1000	0.998425	0.701841	-0.0487951	0.328701	10.0378	0.271734
	0.8	1.15	1.15	0.45	10	0.8	1000	1.08031	0.481672	-0.606593	0.290142	10.0366	0.15902
	0.8	1.15	1.15	0.45	10	1.15	1000	0.974153	0.638827	-0.141794	0.152814	9.64318	0.513108
	0.8	1.15	1.15	0.45	10	1.5	1000	0.580358	0.554858	-0.0988112	0.298177	10.0257	0.387667
	0.8	1.15	1.15	0.8	2.575	0.45	1000	1.0506	0.533409	-0.453698	0.0001	4.4863	0.0001
	0.8	1.15	1.15	0.8	2.575	0.8	1000	0.726068	0.663444	-0.0625426	0.0001	3.60628	0.266394
	0.8	1.15	1.15	0.8	2.575	1.15	1000	0.551473	0.657569	-0.0261529	0.0001	3.23359	0.267522
	0.8	1.15	1.15	0.8	2.575	1.5	1000	0.740004	0.595814	-0.164473	0.0001	3.42943	0.0001
	0.8	1.15	1.15	0.8	5.05	0.45	15.9899	0.168058	0.160184	0.655487	0.767576	26.7723	0.395503
	0.8	1.15	1.15	0.8	5.05	0.8	15.9899	0.168058	0.160183	0.655487	0.76757	26.7719	0.395502
	0.8	1.15	1.15	0.8	5.05	1.15	15.9899	0.168017	0.160222	0.655402	0.767606	26.7742	0.395508
	0.8	1.15	1.15	0.8	5.05	1.5	15.9899	0.16806	0.160182	0.655489	0.76764	26.7763	0.395513
	0.8	1.15	1.15	0.8	7.525	0.45	1000	1.02703	0.597215	-0.296162	0.0001	6.75564	0.225625
	0.8	1.15	1.15	0.8	7.525	0.8	1000	0.961691	0.543309	-0.343463	0.224639	7.1903	0.504042
	0.8	1.15	1.15	0.8	7.525	1.15	1000	0.87341	0.636713	-0.0574477	0.12838	7.45208	0.339098
	0.8	1.15	1.15	0.8	7.525	1.5	1000	0.47754	0.489041	-0.186175	0.123108	7.42647	0.307698
	0.8	1.15	1.15	0.8	10	0.45	1000	1.0932	0.476836	-0.639491	0.237136	10.0491	0.290795
	0.8	1.15	1.15	0.8	10	0.8	1000	1.08352	0.402939	-0.769238	0.176539	8.99458	0.353788
	0.8	1.15	1.15	0.8	10	1.15	1000	0.841715	0.628749	-0.0855265	0.36474	9.43568	0.326501
	0.8	1.15	1.15	0.8	10	1.5	1000	0.534739	0.570749	-0.0560846	0.302788	10.0503	0.392743
	0.8	1.15	1.15	1.15	2.575	0.45	1000	1.00471	0.578516	-0.298329	0.0001	3.9456	0.0001
	0.8	1.15	1.15	1.15	2.575	0.8	1000	0.750534	0.687105	-0.0427372	0.0001	3.44146	0.265626
	0.8	1.15	1.15	1.15	2.575	1.15	1000	0.832213	0.638746	-0.081635	0.0001	3.35788	0.0604323
	0.8	1.15	1.15	1.15	2.575	1.5	1000	1.05132	0.553971	-0.415786	0.0001	3.22134	0.0001
	0.8	1.15	1.15	1.15	5.05	0.45	15.9899	0.168046	0.160199	0.65545	0.767602	26.7738	0.395512
	0.8	1.15	1.15	1.15	5.05	0.8	15.9899	0.168065	0.160171	0.655521	0.767607	26.7744	0.395508
	0.8	1.15	1.15	1.15	5.05	1.15	15.9899	0.16806	0.160179	0.655496	0.767575	26.7723	0.395502
	0.8	1.15	1.15	1.15	5.05	1.5	15.9899	0.168059	0.160179	0.655498	0.767624	26.7755	0.395517
	0.8	1.15	1.15	1.15	7.525	0.45	1000	1.08338	0.479047	-0.615384	0.0339762	7.62008	0.401374
	0.8	1.15	1.15	1.15	7.525	0.8	1000	0.885527	0.623145	-0.0970118	0.13502	7.46552	0.351441
	0.8	1.15	1.15	1.15	7.525	1.15	1000	0.662518	0.535277	-0.17382	0.151326	7.43512	0.314466
	0.8	1.15	1.15	1.15	7.525	1.5	1000	0.50858	0.606456	-0.0172166	0.243569	7.51782	0.274588
	0.8	1.15	1.15	1.15	10	0.45	1000	1.08619	0.478445	-0.621868	0.163421	10.0626	0.383055
	0.8	1.15	1.15	1.15	10	0.8	1000	0.961589	0.64606	-0.110524	0.247922	9.54893	0.429916
	0.8	1.15	1.15	1.15	10	1.15	1000	0.586011	0.561828	-0.0924966	0.300323	10.0683	0.387681
	0.8	1.15	1.15	1.15	10	1.5	1000	0.817064	0.596393	-0.186498	0.25514	10.0888	0.0436792
	0.8	1.15	1.15	1.5	2.575	0.45	1000	0.909706	0.581928	-0.211096	0.0001	3.50038	0.0555472
	0.8	1.15	1.15	1.5	2.575	0.8	1000	0.781744	0.610655	-0.104621	0.0001	3.3808	0.123858
	0.8	1.15	1.15	1.5	2.575	1.15	1000	1.03134	0.552346	-0.38674	0.0001	3.20944	0.0001
	0.8	1.15	1.15	1.5	2.575	1.5	1000	1.07302	0.459406	-0.633369	0.0001	3.20737	0.567222
	0.8	1.15	1.15	1.5	5.05	0.45	15.9899	0.168053	0.160181	0.655495	0.76759	26.7734	0.395506
	0.8	1.15	1.15	1.5	5.05	0.8	15.9899	0.168068	0.160172	0.655516	0.767617	26.7749	0.395512
	0.8	1.15	1.15	1.5	5.05	1.15	15.9899	0.168058	0.160182	0.655487	0.767578	26.7724	0.395507
	0.8	1.15	1.15	1.5	5.05	1.5	1000	1.06309	0.504988	-0.52851	0.0001	5.37137	0.0001
	0.8	1.15	1.15	1.5	7.525	0.45	1000	0.88255	0.64266	-0.0487687	0.120361	7.49993	0.336739
	0.8	1.15	1.15	1.5	7.525	0.8	1000	0.801031	0.601271	-0.0995212	0.15969	7.4764	0.290715
	0.8	1.15	1.15	1.5	7.525	1.15	1000	0.106509	0.427556	-0.226362	0.190028	7.39464	0.357778
	0.8	1.15	1.15	1.5	7.525	1.5	1000	1.02432	0.602713	-0.276281	0.0001	7.72309	0.0001
	0.8	1.15	1.15	1.5	10	0.45	1000	1.07694	0.475893	-0.610635	0.121692	10.0816	0.479096
	0.8	1.15	1.15	1.5	10	0.8	1000	0.600749	0.556935	-0.105382	0.299666	10.0783	0.386006
	0.8	1.15	1.15	1.5	10	1.15	1000	0.925998	0.643305	-0.128338	0.0429313	10.1214	0.00739733
	0.8	1.15	1.15	1.5	10	1.5	1000	1.00617	0.645929	-0.163063	0.0001	10.1399	0.0001
	0.8	1.15	1.5	0.45	2.575	0.45	1000	1.08473	0.553763	-0.0655134	0.0001	7.22103	0.00246312
	0.8	1.15	1.5	0.45	2.575	0.8	1000	1.07528	0.504838	-0.255144	0.0001	5.45813	0.265085
	0.8	1.15	1.5	0.45	2.575	1.15	1000	1.1403	0.63516	-0.21824	0.0001	5.16868	0.288348
	0.8	1.15	1.5	0.45	2.575	1.5	1000	0.988277	0.073786	-0.792834	0.0001	2.64976	0.319061
	0.8	1.15	1.5	0.45	5.05	0.45	1000	1.07929	0.565254	-0.0363103	0.00764516	4.96594	0.0001
	0.8	1.15	1.5	0.45	5.05	0.8	1000	1.20504	0.302207	-0.708628	0.0001	5.07324	0.275215
	0.8	1.15	1.5	0.45	5.05	1.15	15.9899	0.16805	0.160195	0.655461	0.767611	26.7746	0.395511
	0.8	1.15	1.5	0.45	5.05	1.5	15.9899	0.168059	0.160181	0.655493	0.76757	26.772	0.395501
	0.8	1.15	1.5	0.45	7.525	0.45	1000	1.1936	0.324927	-0.679271	0.198907	7.69344	0.279391
	0.8	1.15	1.5	0.45	7.525	0.8	1000	1.19446	0.323197	-0.668072	0.158262	7.62606	0.207143
	0.8	1.15	1.5	0.45	7.525	1.15	1000	1.18418	0.34203	-0.573806	0.485755	7.50659	0.38575
	0.8	1.15	1.5	0.45	7.525	1.5	1000	1.2093	0.257897	-0.710732	0.341161	7.44853	0.347436
	0.8	1.15	1.5	0.45	10	0.45	1000	1.10538	0.509648	-0.193576	0.335476	10.101	0.30212
	0.8	1.15	1.5	0.45	10	0.8	1000	1.11109	0.498029	-0.211365	0.310866	10.0673	0.236253
	0.8	1.15	1.5	0.45	10	1.15	1000	1.22275	0.254354	-0.803503	0.288198	10.0427	0.0059901
	0.8	1.15	1.5	0.45	10	1.5	1000	1.08401	0.530305	-0.0388214	0.303488	9.93242	0.385431
	0.8	1.15	1.5	0.8	2.575	0.45	1000	0.439412	0.550113	-0.319856	0.139272	5.46595	0.304034
	0.8	1.15	1.5	0.8	2.575	0.8	1000	1.17981	0.515245	-0.496218	0.0001	5.62204	0.281206
	0.8	1.15	1.5	0.8	2.575	1.15	1000	1.02883	0.0821097	-0.798615	0.0001	3.01106	0.338142
	0.8	1.15	1.5	0.8	2.575	1.5	1000	0.952985	0.680088	-0.163708	0.0001	3.61094	0.267412
	0.8	1.15	1.5	0.8	5.05	0.45	1000	1.26143	0.184322	-1.02244	0.0301075	5.0966	0.280275
	0.8	1.15	1.5	0.8	5.05	0.8	1000	1.07974	0.563243	-0.0153007	0.0579844	5.11413	0.272086
	0.8	1.15	1.5	0.8	5.05	1.15	15.9899	0.168054	0.160184	0.655488	0.767572	26.7721	0.3955
	0.8	1.15	1.5	0.8	5.05	1.5	15.9899	0.16803	0.160245	0.655341	0.767575	26.7722	0.395522
	0.8	1.15	1.5	0.8	7.525	0.45	1000	0.654176	0.385259	-0.156148	0.158856	6.1237	0.283758
	0.8	1.15	1.5	0.8	7.525	0.8	1000	1.10686	0.504322	-0.156833	0.177286	7.39704	0.558937
	0.8	1.15	1.5	0.8	7.525	1.15	1000	1.22074	0.252085	-0.761285	0.310199	7.48989	0.335287
	0.8	1.15	1.5	0.8	7.525	1.5	1000	1.18861	0.275564	-0.632852	0.386266	7.41367	0.370166
	0.8	1.15	1.5	0.8	10	0.45	1000	1.2555	0.195392	-1.01792	0.28047	10.0962	0.31732
	0.8	1.15	1.5	0.8	10	0.8	1000	1.07986	0.562886	-0.0271756	0.252547	8.07326	0.0001
	0.8	1.15	1.5	0.8	10	1.15	1000	1.1965	0.274912	-0.662317	0.352377	9.42829	0.570096
	0.8	1.15	1.5	0.8	10	1.5	1000	1.22359	0.181796	-0.837633	0.314799	9.84855	0.485327
	0.8	1.15	1.5	1.15	2.575	0.45	1000	1.02729	0.876816	-0.199814	0.0124239	4.82329	0.262041
	0.8	1.15	1.5	1.15	2.575	0.8	1000	0.910143	0.369399	-0.161325	0.0001	3.63679	0.302433
	0.8	1.15	1.5	1.15	2.575	1.15	1000	0.894275	0.421971	-0.047752	0.0001	2.93724	0.285806
	0.8	1.15	1.5	1.15	2.575	1.5	1000	0.630305	0.572518	-0.125976	0.0001	3.51858	0.26815
	0.8	1.15	1.5	1.15	5.05	0.45	15.9899	0.16806	0.160183	0.655486	0.767567	26.7718	0.395501
	0.8	1.15	1.5	1.15	5.05	0.8	1000	1.14266	0.425073	-0.344791	0.0001	5.1071	0.28084
	0.8	1.15	1.5	1.15	5.05	1.15	15.9899	0.16806	0.160183	0.655487	0.76757	26.772	0.395502
	0.8	1.15	1.5	1.15	5.05	1.5	15.9899	0.168059	0.160181	0.655494	0.767572	26.7722	0.395502
	0.8	1.15	1.5	1.15	7.525	0.45	1000	1.07968	0.564163	-0.0381253	0.0836506	7.6456	0.413952
	0.8	1.15	1.5	1.15	7.525	0.8	1000	1.22337	0.250849	-0.77564	0.300678	7.51338	0.33298
	0.8	1.15	1.5	1.15	7.525	1.15	1000	1.20258	0.261216	-0.688328	0.343472	7.43229	0.3626
	0.8	1.15	1.5	1.15	7.525	1.5	1000	1.1761	0.259222	-0.639294	0.251211	7.18272	0.372441
	0.8	1.15	1.5	1.15	10	0.45	1000	1.07313	0.577863	-0.00405702	0.210742	10.0773	0.413357
	0.8	1.15	1.5	1.15	10	0.8	1000	1.19829	0.310622	-0.65522	0.215535	7.74735	0.0001
	0.8	1.15	1.5	1.15	10	1.15	1000	1.18604	0.286686	-0.606386	0.317659	9.88244	0.455489
	0.8	1.15	1.5	1.15	10	1.5	1000	1.13524	0.325548	-0.452892	0.314225	9.76911	0.492719
	0.8	1.15	1.5	1.5	2.575	0.45	1000	0.826465	0.398415	-0.293589	0.0001	4.75669	0.230123
	0.8	1.15	1.5	1.5	2.575	0.8	1000	0.760603	0.290346	-0.201106	0.0001	3.17147	0.279662
	0.8	1.15	1.5	1.5	2.575	1.15	1000	0.620052	0.572762	-0.353067	0.0001	3.73422	0.269219
	0.8	1.15	1.5	1.5	2.575	1.5	1000	0.691293	0.407753	-0.053253	0.0001	3.766	0.284988
	0.8	1.15	1.5	1.5	5.05	0.45	1000	1.14442	0.420939	-0.353596	0.00725778	5.1543	0.27651
	0.8	1.15	1.5	1.5	5.05	0.8	1000	0.755317	0.381603	-0.0136299	0.0187451	5.15022	0.288024
	0.8	1.15	1.5	1.5	5.05	1.15	1000	0.77196	0.391841	-0.00132247	0.0193755	5.16503	0.290258
	0.8	1.15	1.5	1.5	5.05	1.5	15.9899	0.168062	0.160172	0.655516	0.767594	26.7735	0.395503
	0.8	1.15	1.5	1.5	7.525	0.45	1000	1.22282	0.251411	-0.772655	0.305304	7.53888	0.333144
	0.8	1.15	1.5	1.5	7.525	0.8	1000	1.20843	0.253929	-0.711514	0.322482	7.48133	0.355274
	0.8	1.15	1.5	1.5	7.525	1.15	1000	1.1833	0.256095	-0.655745	0.403512	7.28096	0.383987
	0.8	1.15	1.5	1.5	7.525	1.5	1000	0.29938	0.312479	-0.101561	0.204907	7.27651	0.460301
	0.8	1.15	1.5	1.5	10	0.45	1000	1.09838	0.524799	-0.136142	0.180165	10.1018	0.469314
	0.8	1.15	1.5	1.5	10	0.8	1000	1.14916	0.379462	-0.395695	0.3161	9.93482	0.413461
	0.8	1.15	1.5	1.5	10	1.15	1000	1.11924	0.382769	-0.330959	0.314284	9.81939	0.468535
	0.8	1.15	1.5	1.5	10	1.5	1000	0.600642	0.403321	-0.0491499	0.325208	9.73759	0.463289
	0.8	1.5	0.45	0.45	2.575	0.45	1000	0.756816	1.35401	-0.0445529	0.0001	2.97053	0.15609
	0.8	1.5	0.45	0.45	2.575	0.8	1000	0.786411	1.347	-0.0796068	0.0001	2.86216	0.0178171
	0.8	1.5	0.45	0.45	2.575	1.15	1000	0.760839	1.28018	-0.303043	0.0001	2.8676	0.22792
	0.8	1.5	0.45	0.45	2.575	1.5	1000	0.7559	1.33312	-0.116445	0.0001	2.75924	1.01968
	0.8	1.5	0.45	0.45	5.05	0.45	1000	0.714085	1.36145	-0.00291011	0.0501	5.05512	0.286517
	0.8	1.5	0.45	0.45	5.05	0.8	1000	0.71819	1.35992	-0.0100711	0.0501	5.09652	0.284286
	0.8	1.5	0.45	0.45	5.05	1.15	1000	0.753219	1.33554	-0.107096	0.0001	5.13606	0.148479
	0.8	1.5	0.45	0.45	5.05	1.5	1000	0.729932	1.33509	-0.10108	0.0001	5.12846	0.762892
	0.8	1.5	0.45	0.45	7.525	0.45	1000	0.767764	1.32806	-0.138926	0.170935	7.55191	0.235671
	0.8	1.5	0.45	0.45	7.525	0.8	1000	0.784887	1.36169	-0.0279585	0.142962	7.55386	0.0001
	0.8	1.5	0.45	0.45	7.525	1.15	1000	0.713445	1.30887	-0.186302	0.0001	7.55695	0.0001
	0.8	1.5	0.45	0.45	7.525	1.5	1000	0.720038	1.33915	-0.0849029	0.0001	7.56861	0.672205
	0.8	1.5	0.45	0.45	10	0.45	1000	0.781162	1.34017	-0.101681	0.328213	10.0132	0.255519
	0.8	1.5	0.45	0.45	10	0.8	1000	0.740726	1.34199	-0.0817865	0.276513	10.0152	0.202082
	0.8	1.5	0.45	0.45	10	1.15	1000	0.726608	1.34317	-0.0728772	0.4001	10.0087	0.452253
	0.8	1.5	0.45	0.45	10	1.5	1000	0.756213	1.36101	-0.0222155	0.0001	10.0258	0.80336
	0.8	1.5	0.45	0.8	2.575	0.45	1000	0.777494	1.36541	-0.0117934	0.0001	2.90319	0.0001
	0.8	1.5	0.45	0.8	2.575	0.8	1000	0.762266	1.31942	-0.166566	0.0001	2.89327	0.180636
	0.8	1.5	0.45	0.8	2.575	1.15	1000	0.760412	1.33639	-0.106691	0.0001	2.82145	0.82503
	0.8	1.5	0.45	0.8	2.575	1.5	1000	0.742002	1.32383	-0.143902	0.0001	2.79966	1.27128
	0.8	1.5	0.45	0.8	5.05	0.45	1000	0.729058	1.36182	-0.00712475	0.0134682	5.12282	0.30299
	0.8	1.5	0.45	0.8	5.05	0.8	1000	0.770652	1.35202	-0.0559476	0.0001	5.15876	0.0659351
	0.8	1.5	0.45	0.8	5.05	1.15	1000	0.764898	1.36548	-0.00706316	0.0001	5.15021	0.706061
	0.8	1.5	0.45	0.8	5.05	1.5	1000	0.752916	1.36327	-0.0111799	0.0001	5.14319	1.1909
	0.8	1.5	0.45	0.8	7.525	0.45	1000	0.759502	1.36379	-0.0108433	0.125025	7.48329	0.393898
	0.8	1.5	0.45	0.8	7.525	0.8	1000	0.757788	1.32918	-0.130865	0.0001	7.57255	0.0001
	0.8	1.5	0.45	0.8	7.525	1.15	1000	0.717057	1.30466	-0.202034	0.0001	7.59347	0.205526
	0.8	1.5	0.45	0.8	7.525	1.5	1000	0.747738	1.36025	-0.0210259	0.0001	7.58387	1.05431
	0.8	1.5	0.45	0.8	10	0.45	1000	0.746254	1.30867	-0.199013	0.227891	10.0301	0.286071
	0.8	1.5	0.45	0.8	10	0.8	1000	0.765234	1.36192	-0.0195522	0.4001	10.0215	0.419409
	0.8	1.5	0.45	0.8	10	1.15	1000	0.737056	1.34687	-0.0628176	0.0001	10.0372	0.477645
	0.8	1.5	0.45	0.8	10	1.5	1000	0.743146	1.35229	-0.0485307	0.0001	10.0421	0.932856
	0.8	1.5	0.45	1.15	2.575	0.45	1000	0.755371	1.36659	-0.000579381	0.0001	2.87006	0.344742
	0.8	1.5	0.45	1.15	2.575	0.8	1000	0.737035	1.34092	-0.0831767	0.0001	2.86683	0.690118
	0.8	1.5	0.45	1.15	2.575	1.15	1000	0.715024	1.30839	-0.188452	0.0001	2.86716	1.06971
	0.8	1.5	0.45	1.15	2.575	1.5	1000	0.709197	1.30541	-0.196878	0.0001	2.84599	1.53813
	0.8	1.5	0.45	1.15	5.05	0.45	1000	0.759293	1.35718	-0.0339808	0.0001	5.17578	0.0001
	0.8	1.5	0.45	1.15	5.05	0.8	1000	0.731821	1.30874	-0.192818	0.0001	5.19901	0.214548
	0.8	1.5	0.45	1.15	5.05	1.15	1000	0.727622	1.31599	-0.166275	0.0001	5.19066	0.854856
	0.8	1.5	0.45	1.15	5.05	1.5	1000	0.752756	1.36314	-0.0116158	0.0001	5.16779	1.52272
	0.8	1.5	0.45	1.15	7.525	0.45	1000	0.751544	1.3598	-0.0224012	0.0380537	7.59424	0.423285
	0.8	1.5	0.45	1.15	7.525	0.8	1000	0.739756	1.31758	-0.164852	0.0001	7.60952	0.20011
	0.8	1.5	0.45	1.15	7.525	1.15	1000	0.734172	1.33092	-0.116726	0.0001	7.61152	0.799146
	0.8	1.5	0.45	1.15	7.525	1.5	1000	0.738832	1.35203	-0.0458989	0.0001	7.60493	1.36475
	0.8	1.5	0.45	1.15	10	0.45	1000	0.756029	1.36044	-0.0217761	0.159441	10.0463	0.40042
	0.8	1.5	0.45	1.15	10	0.8	1000	0.725744	1.29201	-0.248848	0.0001	10.054	0.13131
	0.8	1.5	0.45	1.15	10	1.15	1000	0.732661	1.33556	-0.100295	0.0001	10.0608	0.744201
	0.8	1.5	0.45	1.15	10	1.5	1000	0.722351	1.34143	-0.0778927	0.0001	10.0601	1.22709
	0.8	1.5	0.45	1.5	2.575	0.45	1000	0.813302	1.36249	-0.0369048	0.3	2.78246	0.773734
	0.8	1.5	0.45	1.5	2.575	0.8	1000	0.814052	1.35473	-0.0643803	0.0001	2.83046	1.30902
	0.8	1.5	0.45	1.5	2.575	1.15	1000	0.767196	1.35707	-0.0405331	0.0001	2.84504	1.63076
	0.8	1.5	0.45	1.5	2.575	1.5	1000	0.744973	1.35391	-0.0433696	0.0001	2.84897	1.98209
	0.8	1.5	0.45	1.5	5.05	0.45	1000	0.735175	1.34962	-0.0547421	0.0001	5.19962	0.424267
	0.8	1.5	0.45	1.5	5.05	0.8	1000	0.750761	1.36168	-0.0173546	0.0001	5.19639	1.00573
	0.8	1.5	0.45	1.5	5.05	1.15	1000	0.723488	1.34171	-0.0771602	0.0001	5.20164	1.36253
	0.8	1.5	0.45	1.5	5.05	1.5	1000	0.722952	1.34137	-0.0781544	0.0001	5.19695	1.78942
	0.8	1.5	0.45	1.5	7.525	0.45	1000	0.740773	1.35443	-0.0384129	0.0001	7.61524	0.398319
	0.8	1.5	0.45	1.5	7.525	0.8	1000	0.721701	1.33549	-0.0974637	0.0001	7.62776	0.725752
	0.8	1.5	0.45	1.5	7.525	1.15	1000	0.738495	1.35179	-0.0466502	0.0001	7.62442	1.2974
	0.8	1.5	0.45	1.5	7.525	1.5	1000	0.72676	1.34377	-0.0709658	0.0001	7.62359	1.69213
	0.8	1.5	0.45	1.5	10	0.45	1000	0.731517	1.34455	-0.0692882	0.161258	10.0624	0.514219
	0.8	1.5	0.45	1.5	10	0.8	1000	0.73084	1.33964	-0.085756	0.0001	10.0737	0.699054
	0.8	1.5	0.45	1.5	10	1.15	1000	0.742555	1.35482	-0.0373652	0.0001	10.0734	1.23891
	0.8	1.5	0.45	1.5	10	1.5	1000	0.722692	1.34121	-0.0786336	0.0001	10.0743	1.60534
	0.8	1.5	0.8	0.45	2.575	0.45	1000	0.91563	1.21149	-0.206307	0.0001	3.50916	0.0926347
	0.8	1.5	0.8	0.45	2.575	0.8	1000	0.895355	1.17285	-0.322795	0.0001	3.41108	0.049167
	0.8	1.5	0.8	0.45	2.575	1.15	1000	0.818668	1.20504	-0.19	0.0001	3.17253	0.129718
	0.8	1.5	0.8	0.45	2.575	1.5	1000	0.914519	1.23885	-0.116364	0.0001	2.90583	0.404348
	0.8	1.5	0.8	0.45	5.05	0.45	1000	0.703366	1.23845	-0.0270397	0.0501	5.00535	0.283163
	0.8	1.5	0.8	0.45	5.05	0.8	1000	0.733015	1.2498	-0.000879383	0.0001	5.04803	0.308267
	0.8	1.5	0.8	0.45	5.05	1.15	1000	0.799055	1.22357	-0.115201	0.0470184	5.10246	0.320413
	0.8	1.5	0.8	0.45	5.05	1.5	1000	0.900309	1.24113	-0.10043	0.0001	5.18165	0.0001
	0.8	1.5	0.8	0.45	7.525	0.45	1000	0.919275	1.24095	-0.113133	0.169202	7.56189	0.230983
	0.8	1.5	0.8	0.45	7.525	0.8	1000	0.906222	1.1944	-0.257893	0.102398	7.56226	0.139053
	0.8	1.5	0.8	0.45	7.525	1.15	1000	0.886258	1.22605	-0.144528	0.00248198	7.5503	0.000964046
	0.8	1.5	0.8	0.45	7.525	1.5	1000	0.883577	1.25988	-0.0303751	0.0001	7.58862	0.0001
	0.8	1.5	0.8	0.45	10	0.45	1000	0.91955	1.24843	-0.0892976	0.32727	10.0215	0.250804
	0.8	1.5	0.8	0.45	10	0.8	1000	0.91073	1.20425	-0.227921	0.281113	10.0207	0.160181
	0.8	1.5	0.8	0.45	10	1.15	1000	0.862042	1.25378	-0.0406294	0.132971	9.89244	0.53545
	0.8	1.5	0.8	0.45	10	1.5	1000	0.878284	1.24676	-0.0709287	0.0001	10.0344	0.0001
	0.8	1.5	0.8	0.8	2.575	0.45	1000	0.901417	1.18815	-0.274404	0.0001	3.46485	0.0937958
	0.8	1.5	0.8	0.8	2.575	0.8	1000	0.850403	1.24331	-0.0721081	0.0001	3.16316	0.125707
	0.8	1.5	0.8	0.8	2.575	1.15	1000	0.902234	1.27038	-0.00675858	0.0001	2.94754	0.264994
	0.8	1.5	0.8	0.8	2.575	1.5	1000	0.913073	1.23262	-0.13556	0.0001	2.91681	0.778939
	0.8	1.5	0.8	0.8	5.05	0.45	1000	0.712654	1.24192	-0.0194896	0.0501	5.06808	0.287302
	0.8	1.5	0.8	0.8	5.05	0.8	1000	0.82615	1.22614	-0.116178	0.0571553	5.1143	0.338304
	0.8	1.5	0.8	0.8	5.05	1.15	1000	0.753293	1.24812	-0.022468	0.0135705	5.17054	0.283142
	0.8	1.5	0.8	0.8	5.05	1.5	1000	0.907928	1.21721	-0.182594	0.0001	5.21214	0.312807
	0.8	1.5	0.8	0.8	7.525	0.45	1000	0.885926	1.25754	-0.0403183	0.0886333	7.29004	0.366041
	0.8	1.5	0.8	0.8	7.525	0.8	1000	0.808349	1.24067	-0.0631372	0.22121	7.34025	0.358514
	0.8	1.5	0.8	0.8	7.525	1.15	1000	0.701784	1.23302	-0.0505163	0.091431	7.54905	0.229125
	0.8	1.5	0.8	0.8	7.525	1.5	1000	0.887628	1.24358	-0.0857792	0.0001	7.61424	0.263578
	0.8	1.5	0.8	0.8	10	0.45	1000	0.918852	1.2313	-0.144077	0.227657	10.0339	0.28795
	0.8	1.5	0.8	0.8	10	0.8	1000	0.865455	1.2414	-0.0842355	0.297212	9.7829	0.438623
	0.8	1.5	0.8	0.8	10	1.15	1000	0.823607	1.25814	-0.0158074	0.1001	10.0264	0.0174193
	0.8	1.5	0.8	0.8	10	1.5	1000	0.875008	1.25143	-0.054147	0.0001	10.0554	0.233214
	0.8	1.5	0.8	1.15	2.575	0.45	1000	0.845566	1.25113	-0.0419141	0.0001	3.18376	0.150249
	0.8	1.5	0.8	1.15	2.575	0.8	1000	0.897424	1.25314	-0.0596989	0.0001	3.01435	0.0001
	0.8	1.5	0.8	1.15	2.575	1.15	1000	0.909937	1.22244	-0.166705	0.0001	2.97972	0.563581
	0.8	1.5	0.8	1.15	2.575	1.5	1000	0.909226	1.22051	-0.172596	0.0001	2.93338	1.18005
	0.8	1.5	0.8	1.15	5.05	0.45	1000	0.829005	1.24052	-0.0682918	0.0276635	5.13734	0.331075
	0.8	1.5	0.8	1.15	5.05	0.8	1000	0.755636	1.2507	-0.0121388	0.0001	5.18704	0.295919
	0.8	1.5	0.8	1.15	5.05	1.15	1000	0.90271	1.24902	-0.0761239	0.0001	5.23369	0.284952
	0.8	1.5	0.8	1.15	5.05	1.5	1000	0.907886	1.21711	-0.182899	0.0001	5.22954	0.829789
	0.8	1.5	0.8	1.15	7.525	0.45	1000	0.910969	1.21456	-0.193516	0.027678	7.60155	0.41477
	0.8	1.5	0.8	1.15	7.525	0.8	1000	0.737647	1.24978	-0.00681061	0.0868962	7.56521	0.22666
	0.8	1.5	0.8	1.15	7.525	1.15	1000	0.908609	1.22968	-0.142408	0.0001	7.64257	0.0001
	0.8	1.5	0.8	1.15	7.525	1.5	1000	0.904272	1.20917	-0.206867	0.0001	7.64294	0.610509
	0.8	1.5	0.8	1.15	10	0.45	1000	0.913918	1.21521	-0.193237	0.145356	10.0512	0.371873
	0.8	1.5	0.8	1.15	10	0.8	1000	0.823452	1.24864	-0.0470035	0.0689246	10.0396	0.0119746
	0.8	1.5	0.8	1.15	10	1.15	1000	0.901615	1.24131	-0.100577	0.0001	10.0771	0.0001
	0.8	1.5	0.8	1.15	10	1.5	1000	0.899204	1.19998	-0.234308	0.0001	10.0846	0.459844
	0.8	1.5	0.8	1.5	2.575	0.45	1000	0.842296	1.25324	-0.036227	0.0001	3.00699	0.0546404
	0.8	1.5	0.8	1.5	2.575	0.8	1000	0.859588	1.15801	-0.354749	0.0001	3.04583	0.261805
	0.8	1.5	0.8	1.5	2.575	1.15	1000	0.879718	1.17478	-0.307983	0.0001	2.99156	0.975093
	0.8	1.5	0.8	1.5	2.575	1.5	1000	0.889606	1.18617	-0.27501	0.0001	2.95868	1.54899
	0.8	1.5	0.8	1.5	5.05	0.45	1000	0.743778	1.24774	-0.0158646	0.0001	5.19753	0.30136
	0.8	1.5	0.8	1.5	5.05	0.8	1000	0.881555	1.25798	-0.035612	0.0001	5.24702	0.251433
	0.8	1.5	0.8	1.5	5.05	1.15	1000	0.900321	1.20186	-0.228722	0.0001	5.25969	0.673086
	0.8	1.5	0.8	1.5	5.05	1.5	1000	0.900185	1.20163	-0.229417	0.0001	5.24629	1.2833
	0.8	1.5	0.8	1.5	7.525	0.45	1000	0.804508	1.25548	-0.0139349	0.0696577	7.59332	0.0246963
	0.8	1.5	0.8	1.5	7.525	0.8	1000	0.893089	1.24588	-0.0810328	0.0001	7.65205	0.0001
	0.8	1.5	0.8	1.5	7.525	1.15	1000	0.904185	1.20899	-0.207392	0.0001	7.66238	0.512089
	0.8	1.5	0.8	1.5	7.525	1.5	1000	0.901157	1.20331	-0.224391	0.0001	7.65809	1.10548
	0.8	1.5	0.8	1.5	10	0.45	1000	0.903372	1.19873	-0.241439	0.130398	10.0686	0.503633
	0.8	1.5	0.8	1.5	10	0.8	1000	0.89429	1.25289	-0.0587822	0.0001	10.0869	0.0001
	0.8	1.5	0.8	1.5	10	1.15	1000	0.905239	1.21115	-0.200901	0.0001	10.0994	0.421848
	0.8	1.5	0.8	1.5	10	1.5	1000	0.900119	1.20152	-0.229752	0.0001	10.0996	0.985583
	0.8	1.5	1.15	0.45	2.575	0.45	1000	1.12317	0.989779	-0.630722	0.0001	5.66579	0.0333319
	0.8	1.5	1.15	0.45	2.575	0.8	1000	0.915105	1.14992	-0.0314781	0.0001	4.11868	0.263546
	0.8	1.5	1.15	0.45	2.575	1.15	1000	0.964013	1.12147	-0.185885	0.0001	3.5753	0.254785
	0.8	1.5	1.15	0.45	2.575	1.5	1000	0.770318	1.15003	-0.0268109	0.0001	3.24918	0.26423
	0.8	1.5	1.15	0.45	5.05	0.45	1000	0.760268	1.12988	-0.00342179	0.0001	5.04078	0.302225
	0.8	1.5	1.15	0.45	5.05	0.8	1000	0.720539	1.11441	-0.0182767	0.0180111	5.05084	0.298039
	0.8	1.5	1.15	0.45	5.05	1.15	1000	0.747395	1.12297	-0.00192461	0.0001	5.08429	0.303047
	0.8	1.5	1.15	0.45	5.05	1.5	1000	0.744752	1.12356	-0.00402675	0.1001	5.10016	0.270873
	0.8	1.5	1.15	0.45	7.525	0.45	1000	1.18142	0.902431	-0.945617	0.183003	7.62855	0.255687
	0.8	1.5	1.15	0.45	7.525	0.8	1000	1.11952	0.99245	-0.618684	0.121935	7.58636	0.18971
	0.8	1.5	1.15	0.45	7.525	1.15	1000	1.1151	0.94617	-0.728579	0.255402	7.43118	0.343564
	0.8	1.5	1.15	0.45	7.525	1.5	1000	0.97769	1.12379	-0.101165	0.0869589	7.44295	0.31148
	0.8	1.5	1.15	0.45	10	0.45	1000	1.09612	1.03675	-0.476399	0.330799	10.0604	0.282349
	0.8	1.5	1.15	0.45	10	0.8	1000	1.09873	1.02671	-0.500908	0.293686	10.0421	0.203499
	0.8	1.5	1.15	0.45	10	1.15	1000	1.13666	0.938592	-0.778787	0.147189	9.19614	0.430085
	0.8	1.5	1.15	0.45	10	1.5	1000	0.932733	1.13494	-0.0428939	0.394498	9.91678	0.479553
	0.8	1.5	1.15	0.8	2.575	0.45	1000	1.08085	1.05174	-0.406764	0.0001	4.95841	0.0001
	0.8	1.5	1.15	0.8	2.575	0.8	1000	0.91641	1.15479	-0.0166566	0.0001	3.78566	0.260584
	0.8	1.5	1.15	0.8	2.575	1.15	1000	0.863879	1.13844	-0.0902425	0.0001	3.33096	0.259504
	0.8	1.5	1.15	0.8	2.575	1.5	1000	0.500601	1.13203	-0.000639469	0.0001	3.3604	0.1001
	0.8	1.5	1.15	0.8	5.05	0.45	1000	0.737502	1.12054	-0.00559954	0.0230766	5.08435	0.295944
	0.8	1.5	1.15	0.8	5.05	0.8	1000	0.747047	1.12231	-0.00376968	0.0001	5.10927	0.302608
	0.8	1.5	1.15	0.8	5.05	1.15	1000	0.744628	1.1219	-0.00665448	0.00410492	5.13233	0.301103
	0.8	1.5	1.15	0.8	5.05	1.5	1000	0.748623	1.12395	-0.0116334	0.0501	5.15433	0.287364
	0.8	1.5	1.15	0.8	7.525	0.45	1000	1.12976	0.97556	-0.676306	0.0589358	6.20767	0.0494446
	0.8	1.5	1.15	0.8	7.525	0.8	1000	0.999041	1.14384	-0.0639196	0.192586	7.32937	0.548609
	0.8	1.5	1.15	0.8	7.525	1.15	1000	1.10509	0.919758	-0.79583	0.218782	7.40874	0.371181
	0.8	1.5	1.15	0.8	7.525	1.5	1000	0.968	1.08641	-0.212737	0.0273458	7.40034	0.329222
	0.8	1.5	1.15	0.8	10	0.45	1000	1.02115	1.15295	-0.0657941	0.25288	10.0452	0.334663
	0.8	1.5	1.15	0.8	10	0.8	1000	1.12704	0.9695	-0.685592	0.211856	8.72721	0.221093
	0.8	1.5	1.15	0.8	10	1.15	1000	0.993913	1.06004	-0.312501	0.390497	9.35105	0.412514
	0.8	1.5	1.15	0.8	10	1.5	1000	0.915522	1.09991	-0.143944	0.371963	9.91196	0.437472
	0.8	1.5	1.15	1.15	2.575	0.45	1000	1.04949	1.08766	-0.267627	0.0001	4.33099	0.0001
	0.8	1.5	1.15	1.15	2.575	0.8	1000	0.831795	1.12586	-0.0865955	0.0001	3.52713	0.261977
	0.8	1.5	1.15	1.15	2.575	1.15	1000	0.582245	1.12511	-0.00617518	0.0001	3.31342	0.4001
	0.8	1.5	1.15	1.15	2.575	1.5	1000	1.0225	1.14823	-0.0763792	0.0001	3.22134	0.0001
	0.8	1.5	1.15	1.15	5.05	0.45	1000	0.739295	1.11924	-0.0103066	0.00386422	5.13261	0.301328
	0.8	1.5	1.15	1.15	5.05	0.8	1000	0.762252	1.09842	-0.0819153	0.00961019	5.1547	0.295314
	0.8	1.5	1.15	1.15	5.05	1.15	1000	0.748486	1.12498	-0.00539224	0.0379423	5.17913	0.2919
	0.8	1.5	1.15	1.15	5.05	1.5	1000	0.795116	1.13589	-0.00918002	0.1001	5.22197	0.275149
	0.8	1.5	1.15	1.15	7.525	0.45	1000	1.06226	1.08547	-0.296482	0.0570235	7.62041	0.418669
	0.8	1.5	1.15	1.15	7.525	0.8	1000	1.11064	0.932551	-0.763256	0.328913	7.44998	0.367541
	0.8	1.5	1.15	1.15	7.525	1.15	1000	0.980356	1.11028	-0.146936	0.089112	7.43092	0.323656
	0.8	1.5	1.15	1.15	7.525	1.5	1000	0.842265	1.11957	-0.0656425	0.141521	7.51301	0.219594
	0.8	1.5	1.15	1.15	10	0.45	1000	1.06293	1.08532	-0.298514	0.185866	10.0625	0.410699
	0.8	1.5	1.15	1.15	10	0.8	1000	1.13402	0.930351	-0.797698	0.194523	8.93905	0.307992
	0.8	1.5	1.15	1.15	10	1.15	1000	0.961714	1.04613	-0.329863	0.393901	9.87426	0.50565
	0.8	1.5	1.15	1.15	10	1.5	1000	0.808796	1.13264	-0.0146164	0.306108	10.0872	0.379657
	0.8	1.5	1.15	1.5	2.575	0.45	1000	0.992858	1.13372	-0.0841966	0.0001	3.62649	0.0533028
	0.8	1.5	1.15	1.5	2.575	0.8	1000	0.959667	1.12789	-0.0887206	0.0001	3.41563	0.0001
	0.8	1.5	1.15	1.5	2.575	1.15	1000	1.01237	1.15652	-0.0378309	0.0001	3.20944	0.0001
	0.8	1.5	1.15	1.5	2.575	1.5	1000	1.11429	0.994282	-0.600836	0.0001	3.32238	0.113167
	0.8	1.5	1.15	1.5	5.05	0.45	1000	0.755491	1.09489	-0.0895428	0.0103286	5.17555	0.295628
	0.8	1.5	1.15	1.5	5.05	0.8	1000	0.731078	1.11692	-0.0204984	0.0180557	5.20096	0.296966
	0.8	1.5	1.15	1.5	5.05	1.15	1000	0.775159	1.13101	-0.011426	0.0324839	5.24626	0.284264
	0.8	1.5	1.15	1.5	5.05	1.5	1000	1.0356	1.12434	-0.154945	0.0001	5.37137	0.0001
	0.8	1.5	1.15	1.5	7.525	0.45	1000	1.11065	0.929834	-0.771283	0.271109	7.47881	0.355579
	0.8	1.5	1.15	1.5	7.525	0.8	1000	0.97834	1.11723	-0.122559	0.119146	7.48448	0.315253
	0.8	1.5	1.15	1.5	7.525	1.15	1000	0.872255	1.13752	-0.0198871	0.134647	7.53191	0.231595
	0.8	1.5	1.15	1.5	7.525	1.5	1000	0.855818	1.15001	-0.000300678	0.256203	7.6652	0.232731
	0.8	1.5	1.15	1.5	10	0.45	1000	1.08034	1.05363	-0.40324	0.146368	10.0832	0.482045
	0.8	1.5	1.15	1.5	10	0.8	1000	0.954706	1.0913	-0.187239	0.395221	9.92574	0.493583
	0.8	1.5	1.15	1.5	10	1.15	1000	0.822092	1.13686	-0.00495813	0.305291	10.1009	0.381043
	0.8	1.5	1.15	1.5	10	1.5	1000	0.991345	1.14446	-0.0720059	0.0157372	10.1493	0.00274864
	0.8	1.5	1.5	0.45	2.575	0.45	1000	0.80645	1.02966	-0.0137348	0.252991	7.56578	0.314844
	0.8	1.5	1.5	0.45	2.575	0.8	1000	1.17735	0.867594	-0.618927	0.0001	5.35676	0.291966
	0.8	1.5	1.5	0.45	2.575	1.15	1000	1.23466	0.789801	-0.945457	0.0001	5.2153	0.307117
	0.8	1.5	1.5	0.45	2.575	1.5	1000	1.13767	0.971379	-0.275561	0.0001	3.3601	0.0001
	0.8	1.5	1.5	0.45	5.05	0.45	1000	1.03057	1.02728	-0.0535242	0.0294261	4.97279	0.8001
	0.8	1.5	1.5	0.45	5.05	0.8	1000	1.15586	0.958875	-0.361438	0.304712	5.10908	0.289851
	0.8	1.5	1.5	0.45	5.05	1.15	1000	1.22109	0.866725	-0.665432	0.383998	5.12009	0.298455
	0.8	1.5	1.5	0.45	5.05	1.5	1000	0.856649	0.990115	-0.00915846	0.0120653	5.13317	0.291324
	0.8	1.5	1.5	0.45	7.525	0.45	1000	1.10725	1.02698	-0.135561	0.201369	7.68861	0.290611
	0.8	1.5	1.5	0.45	7.525	0.8	1000	1.1071	1.02999	-0.120953	0.162264	7.62411	0.226215
	0.8	1.5	1.5	0.45	7.525	1.15	1000	1.24251	0.834471	-0.77509	0.359497	7.51958	0.366843
	0.8	1.5	1.5	0.45	7.525	1.5	1000	1.34892	0.684185	-1.2577	0.270548	7.48287	0.324866
	0.8	1.5	1.5	0.45	10	0.45	1000	1.27436	0.768809	-1.02944	0.342708	10.1886	0.306079
[truncated: 2,099 more rows]

## Sheet: Shein
Sheindorf-Rebuhn-Sheintuch (SRS) Equation																17										27	0.001
Daten														Model						MPSD
P					Freundlich		Si					Freundlich		P			Si					P	P	Si	Si
c0	ce	qe	ce	qe	Kf	n	c0	ce	qe	ce	qe	Kf	n	ce	qe	a,P,Si	a,Si,P	ce	qe			(q,exp-q,cal)/qexp^2		(q,exp-q,cal)/qexp^2
µmol/L	µmol/L	µmol/g	mg/L	mg/g			µmol/L	µmol/L	µmol/g	mg/L	mg/g									nm	np		MPSD		MPSD	MPSD,komp
4.973	115.194	335.006	3.571	10.3852	15.5	0.14	9.23	312.456	118.624	8.78	3.33333	7.6	0.6	3.571	15.4863	0.0941562	713.31	8.78	2.89256	33	2	0.241271	0.247703	0.0174849	0.136396	38.4099
4.973	70.5806	332.736	2.188	10.3148			9.23	298.007	112.825	8.374	3.17037			2.188	13.2738			8.374	3.35341			0.082295		0.00333328
4.973	29.5161	290.896	0.915	9.01778			9.23	261.423	148.992	7.346	4.18667			0.915	9.43312			7.346	4.15949			0.00212139		4.21261e-05
4.973	6.70968	243.984	0.208	7.56349			9.23	218.221	174.999	6.132	4.91746			0.208	3.96856			6.132	6.20646			0.22591		0.0687103
5.102	115.548	363.202	3.582	11.2593			13.99	477.224	152.893	13.41	4.2963			3.582	14.2933			13.41	4.40932			0.0726149		0.000692048
5.102	73.2903	338.112	2.272	10.4815			13.99	442.705	204.297	12.44	5.74074			2.272	12.1602			12.44	4.90265			0.0256519		0.0213131
5.102	31.2903	296.201	0.97	9.18222			13.99	393.95	230.921	11.07	6.48889			0.97	8.23998			11.07	6.11201			0.0105301		0.00337342
5.102	9.83871	245.622	0.305	7.61429			13.99	332.633	262.272	9.347	7.36984			0.305	4.08516			9.347	8.11236			0.21482		0.0101506
5.116	109.226	413.381	3.386	12.8148			9.197	312.918	106.498	8.793	2.99259			3.386	15.2331			8.793	2.95892			0.0356121		0.000126606
5.116	66.1613	366.189	2.051	11.3519			9.197	296.512	114.011	8.332	3.2037			2.051	12.9728			8.332	3.42357			0.0203901		0.00470974
5.116	26.0645	308.817	0.808	9.57333			9.197	264.057	140.53	7.42	3.94889			0.808	8.8035			7.42	4.41285			0.00646653		0.0138044
5.116	6.70968	251.306	0.208	7.79048			9.197	215.196	177.936	6.047	5			0.208	4.00367			6.047	6.12177			0.236275		0.050335
5.107	114.548	371.804	3.551	11.5259			14.05	474.377	189.798	13.33	5.33333			3.551	14.2673			13.33	4.39825			0.056568		0.0307397
5.107	72.6129	341.219	2.251	10.5778			14.05	446.619	197.707	12.55	5.55556			2.251	12.0799			12.55	4.96413			0.0201671		0.011333
5.107	32.0323	294.91	0.993	9.14222			14.05	394.306	234.875	11.08	6.6			0.993	8.34999			11.08	6.0613			0.00750928		0.00666197
5.107	9.22581	246.851	0.286	7.65238			14.05	333.132	264.87	9.361	7.44286			0.286	3.88052			9.361	8.32692			0.242951		0.0141087
4.864	116.032	302.748	3.597	9.38519			21.97	740.569	305.786	20.81	8.59259			3.597	12.7571			20.81	6.82331			0.129079		0.0423982
4.864	81.3871	279.689	2.523	8.67037			21.97	688.256	346.646	19.34	9.74074			2.523	11.0577			19.34	7.3002			0.0758149		0.0627751
4.864	47.2903	243.584	1.466	7.55111			21.97	620.641	358.244	17.44	10.0667			1.466	8.56884			17.44	8.1606			0.0181652		0.0358515
4.864	16.5161	222.837	0.512	6.90794			21.97	543.772	377.902	15.28	10.619			0.512	4.46721			15.28	10.7844			0.124836		0.000242573
133.63	133.629	591.935	4.1425	18.35			0	0	0	0	0			4.1425	18.9125			0	0			0.000939593
133.63	109.952	550.255	3.4085	17.0579			0	0	0	0	0			3.4085	18.4031			0	0			0.00621891
133.63	81.3548	524.946	2.522	16.2733			0	0	0	0	0			2.522	17.6431			0	0			0.00708547
133.63	54.8871	460.732	1.7015	14.2827			0	0	0	0	0			1.7015	16.6974			0	0			0.0285825
133.63	13.8387	403.431	0.429	12.5063			0	0	0	0	0			0.429	13.7682			0	0			0.0101794
0	0	0	0	0			374.99	335.27	993.099	9.42109	27.9061			0	0			9.42109	29.1927					0.00212572
0	0	0	0	0			374.99	302.395	907.487	8.49731	25.5004			0	0			8.49731	27.4399					0.00578479
0	0	0	0	0			374.99	258.781	871.598	7.27175	24.4919			0	0			7.27175	24.9918					0.000416509
0	0	0	0	0			374.99	222.208	763.933	6.24403	21.4665			0	0			6.24403	22.8083					0.00390696
0	0	0	0	0			374.99	163.416	634.734	4.04	19.492			0	0			4.04	17.5648					0.00977595
0	0	0	0	0			374.99	121.158	507.672	2.89	15.2947			0	0			2.89	14.3665					0.00368245
0	0	0	0	0			374.99	57.5136	476.221	1.62	13.376			0	0			1.62	10.1513					0.0581194
0	0	0	0	0			374.99	29.0538	345.94	0.816412	9.72092			0	0			0.816412	6.72913					0.0947213

## Sheet: Sheinbatch
					Si
	a,P,Si	a,Si,P		a,P,Si	a,Si,P
irun			MPSD
1	0.5095	50.095	52.8294	0.0564048	919.684
2	0.5095	100.09	52.8294	0.0564048	919.684
3	0.5095	150.085	52.8294	0.0564048	919.684
4	0.5095	200.08	52.8294	0.0564049	919.684
5	0.5095	250.075	52.8294	0.0564048	919.686
6	0.5095	300.07	52.8294	0.0564049	919.684
7	0.5095	350.065	52.8294	0.0564048	919.684
8	0.5095	400.06	52.8294	0.0564046	919.684
9	0.5095	450.055	52.8294	0.0564047	919.685
10	0.5095	500.05	52.8294	0.0564047	919.683
	0.5095	550.045	52.8294	0.0564049	919.684
	0.5095	600.04	52.8294	0.0564048	919.686
	0.5095	650.035	52.8294	0.0564046	919.684
	0.5095	700.03	52.8294	0.0564047	919.684
	0.5095	750.025	52.8294	0.0564049	919.684
	0.5095	800.02	52.8294	0.0564049	919.685
	0.5095	850.015	52.8294	0.0564049	919.684
	0.5095	900.01	52.8294	0.0564046	919.684
	0.5095	950.005	52.8294	0.0564046	919.684
	0.5095	1000	52.8294	0.0564049	919.684
	1.009	50.095	52.8294	0.0564047	919.686
	1.009	100.09	52.8294	0.0564048	919.686
	1.009	150.085	52.8294	0.0564049	919.685
	1.009	200.08	52.8294	0.0564044	919.683
	1.009	250.075	52.8294	0.0564044	919.685
	1.009	300.07	52.8294	0.0564048	919.686
	1.009	350.065	52.8294	0.0564046	919.683
	1.009	400.06	52.8294	0.0564046	919.686
	1.009	450.055	52.8294	0.0564046	919.686
	1.009	500.05	52.8294	0.0564048	919.683
	1.009	550.045	52.8294	0.0564047	919.686
	1.009	600.04	52.8294	0.0564049	919.684
	1.009	650.035	52.8294	0.0564047	919.683
	1.009	700.03	52.8294	0.0564048	919.686
	1.009	750.025	52.8294	0.0564047	919.683
	1.009	800.02	52.8294	0.0564049	919.684
	1.009	850.015	52.8294	0.0564045	919.685
	1.009	900.01	52.8294	0.0564044	919.684
	1.009	950.005	52.8294	0.0564044	919.684
	1.009	1000	52.8294	0.0564046	919.686
	1.5085	50.095	52.8294	0.0564049	919.684
	1.5085	100.09	52.8294	0.0564046	919.687
	1.5085	150.085	52.8294	0.0564041	919.684
	1.5085	200.08	52.8294	0.0564044	919.687
	1.5085	250.075	52.8294	0.0564049	919.685
	1.5085	300.07	52.8294	0.0564049	919.685
	1.5085	350.065	52.8294	0.0564046	919.687
	1.5085	400.06	52.8294	0.0564046	919.687
	1.5085	450.055	52.8294	0.0564044	919.687
	1.5085	500.05	52.8294	0.0564043	919.682
	1.5085	550.045	52.8294	0.0564048	919.683
	1.5085	600.04	52.8294	0.0564048	919.682
	1.5085	650.035	52.8294	0.0564042	919.686
	1.5085	700.03	52.8294	0.0564047	919.682
	1.5085	750.025	52.8294	0.0564041	919.684
	1.5085	800.02	52.8294	0.0564043	919.687
	1.5085	850.015	52.8294	0.0564049	919.683
	1.5085	900.01	52.8294	0.0564049	919.685
	1.5085	950.005	52.8294	0.0564047	919.686
	1.5085	1000	52.8294	0.0564049	919.684
	2.008	50.095	52.8294	0.0564047	919.687
	2.008	100.09	52.8294	0.0564049	919.684
	2.008	150.085	52.8294	0.0564049	919.684
	2.008	200.08	52.8294	0.0564048	919.682
	2.008	250.075	52.8294	0.0564039	919.685
	2.008	300.07	52.8294	0.0564049	919.683
	2.008	350.065	52.8294	0.0564039	919.685
	2.008	400.06	52.8294	0.0564039	919.685
	2.008	450.055	52.8294	0.0564049	919.686
	2.008	500.05	52.8294	0.0564048	919.687
	2.008	550.045	52.8294	0.0564049	919.686
	2.008	600.04	52.8294	0.0564048	919.682
	2.008	650.035	52.8294	0.0564044	919.681
	2.008	700.03	52.8294	0.0564047	919.681
	2.008	750.025	52.8294	0.0564045	919.681
	2.008	800.02	52.8294	0.0564045	919.681
	2.008	850.015	52.8294	0.0564049	919.684
	2.008	900.01	52.8294	0.0564043	919.684
	2.008	950.005	52.8294	0.0564048	919.682
	2.008	1000	52.8294	0.0564049	919.683
	2.5075	50.095	52.8294	0.0564049	919.686
	2.5075	100.09	52.8294	0.0564039	919.688
	2.5075	150.085	52.8294	0.0564038	919.681
	2.5075	200.08	52.8294	0.0564048	919.686
	2.5075	250.075	52.8294	0.0564049	919.684
	2.5075	300.07	52.8294	0.0564043	919.682
	2.5075	350.065	52.8294	0.0564049	919.687
	2.5075	400.06	52.8294	0.0564046	919.681
	2.5075	450.055	52.8294	0.0564049	919.684
	2.5075	500.05	52.8294	0.0564038	919.682
	2.5075	550.045	52.8294	0.0564049	919.684
	2.5075	600.04	52.8294	0.056404	919.689
	2.5075	650.035	52.8294	0.0564044	919.68
	2.5075	700.03	52.8294	0.0564039	919.681
	2.5075	750.025	52.8294	0.0564047	919.681
	2.5075	800.02	52.8294	0.0564042	919.681
	2.5075	850.015	52.8294	0.0564042	919.689
	2.5075	900.01	52.8294	0.0564037	919.683
	2.5075	950.005	52.8294	0.056404	919.688
	2.5075	1000	52.8294	0.0564049	919.686
	3.007	50.095	52.8294	0.0564049	919.685
	3.007	100.09	52.8294	0.0564035	919.682
	3.007	150.085	52.8294	0.0564036	919.681
	3.007	200.08	52.8294	0.056404	919.68
	3.007	250.075	52.8294	0.0564041	919.679
	3.007	300.07	52.8294	0.0564048	919.687
	3.007	350.065	52.8294	0.0564046	919.688
	3.007	400.06	52.8294	0.0564034	919.687
	3.007	450.055	52.8294	0.0564046	919.68
	3.007	500.05	52.8294	0.0564045	919.682
	3.007	550.045	52.8294	0.0564041	919.68
	3.007	600.04	52.8294	0.0564034	919.687
	3.007	650.035	52.8294	0.0564049	919.682
	3.007	700.03	52.8294	0.0564043	919.689
	3.007	750.025	52.8294	0.0564037	919.68
	3.007	800.02	52.8294	0.0564048	919.682
	3.007	850.015	52.8294	0.0564041	919.679
	3.007	900.01	52.8294	0.0564048	919.682
	3.007	950.005	52.8294	0.0564049	919.683
	3.007	1000	52.8294	0.0564034	919.683
	3.5065	50.095	52.8294	0.0564049	919.685
	3.5065	100.09	52.8294	0.0564049	919.686
	3.5065	150.085	52.8294	0.0564034	919.68
	3.5065	200.08	52.8294	0.0564035	919.69
	3.5065	250.075	52.8294	0.0564042	919.678
	3.5065	300.07	52.8294	0.0564049	919.685
	3.5065	350.065	52.8294	0.0564048	919.682
	3.5065	400.06	52.8294	0.0564039	919.678
	3.5065	450.055	52.8294	0.0564031	919.684
	3.5065	500.05	52.8294	0.0564035	919.69
	3.5065	550.045	52.8294	0.0564033	919.683
	3.5065	600.04	52.8294	0.0564034	919.68
	3.5065	650.035	52.8294	0.0564037	919.679
	3.5065	700.03	52.8294	0.0564039	919.678
	3.5065	750.025	52.8294	0.0564038	919.678
	3.5065	800.02	52.8294	0.0564049	919.685
	3.5065	850.015	52.8294	0.0564042	919.691
	3.5065	900.01	52.8294	0.0564045	919.68
	3.5065	950.005	52.8294	0.0564049	919.687
	3.5065	1000	52.8294	0.0564041	919.678
	4.006	50.095	52.8294	0.0564038	919.677
	4.006	100.09	52.8294	0.056403	919.687
	4.006	150.085	52.8294	0.0564044	919.691
	4.006	200.08	52.8294	0.0564029	919.684
	4.006	250.075	52.8294	0.056403	919.688
	4.006	300.07	52.8294	0.0564047	919.689
	4.006	350.065	52.8294	0.0564035	919.678
	4.006	400.06	52.8294	0.0564049	919.687
	4.006	450.055	52.8294	0.0564043	919.678
	4.006	500.05	52.8294	0.0564047	919.68
	4.006	550.045	52.8294	0.0564039	919.677
	4.006	600.04	52.8294	0.056403	919.687
	4.006	650.035	52.8294	0.0564045	919.679
	4.006	700.03	52.8294	0.0564045	919.691
	4.006	750.025	52.8294	0.0564039	919.678
	4.006	800.02	52.8294	0.056403	919.687
	4.006	850.015	52.8294	0.0564041	919.677
	4.006	900.01	52.8294	0.0564049	919.686
	4.006	950.005	52.8294	0.0564049	919.682
	4.006	1000	52.8294	0.0564038	919.677
	4.5055	50.095	52.8294	0.056403	919.69
	4.5055	100.09	52.8294	0.0564035	919.693
	4.5055	150.085	52.8294	0.0564038	919.685
	4.5055	200.08	52.8294	0.0564045	919.691
	4.5055	250.075	52.8294	0.0564038	919.676
	4.5055	300.07	52.8294	0.0564028	919.68
	4.5055	350.065	52.8294	0.0564033	919.677
	4.5055	400.06	52.8294	0.0564047	919.68
	4.5055	450.055	52.8294	0.0564034	919.692
	4.5055	500.05	52.8294	0.0564038	919.693
	4.5055	550.045	52.8294	0.0564031	919.691
	4.5055	600.04	52.8294	0.0564026	919.685
	4.5055	650.035	52.8294	0.0564039	919.676
	4.5055	700.03	52.8294	0.0564041	919.677
	4.5055	750.025	52.8294	0.0564049	919.687
	4.5055	800.02	52.8294	0.0564043	919.691
	4.5055	850.015	52.8294	0.0564027	919.685
	4.5055	900.01	52.8294	0.0564049	919.685
	4.5055	950.005	52.8294	0.0564031	919.678
	4.5055	1000	52.8294	0.056404	919.692
	5.005	50.095	52.8294	0.0564035	919.676
	5.005	100.09	52.8294	0.0564038	919.694
	5.005	150.085	52.8294	0.0564025	919.681
	5.005	200.08	52.8294	0.0564049	919.685
	5.005	250.075	52.8294	0.0564045	919.678
	5.005	300.07	52.8294	0.0564029	919.677
	5.005	350.065	52.8294	0.0564033	919.676
	5.005	400.06	52.8294	0.0564024	919.682
	5.005	450.055	52.8294	0.0564024	919.683
	5.005	500.05	52.8294	0.0564032	919.676
	5.005	550.045	52.8294	0.0564043	919.692
	5.005	600.04	52.8294	0.0564045	919.678
	5.005	650.035	52.8294	0.0564044	919.677
	5.005	700.03	52.8294	0.0564036	919.675
	5.005	750.025	52.8294	0.0564038	919.675
	5.005	800.02	52.8294	0.0564037	919.684
	5.005	850.015	52.8294	0.0564031	919.693
	5.005	900.01	52.8294	0.0564048	919.68
	5.005	950.005	52.8294	0.0564034	919.693
	5.005	1000	52.8294	0.0564038	919.693
	5.5045	50.095	52.8294	0.0564041	919.675
	5.5045	100.09	52.8294	0.0564042	919.693
	5.5045	150.085	52.8294	0.0564036	919.678
	5.5045	200.08	52.8294	0.0564031	919.682
	5.5045	250.075	52.8294	0.0564034	919.675
	5.5045	300.07	52.8294	0.0564022	919.683
	5.5045	350.065	52.8294	0.0564048	919.68
	5.5045	400.06	52.8294	0.0564033	919.694
	5.5045	450.055	52.8294	0.0564035	919.674
	5.5045	500.05	52.8294	0.0564039	919.692
	5.5045	550.045	52.8294	0.0564037	919.675
	5.5045	600.04	52.8294	0.0564027	919.676
	5.5045	650.035	52.8294	0.0564037	919.675
	5.5045	700.03	52.8294	0.0564046	919.678
	5.5045	750.025	52.8294	0.0564038	919.693
	5.5045	800.02	52.8294	0.0564049	919.685
	5.5045	850.015	52.8294	0.0564026	919.677
	5.5045	900.01	52.8294	0.0564048	919.681
	5.5045	950.005	52.8294	0.0564049	919.687
	5.5045	1000	52.8294	0.0564049	919.683
	6.004	50.095	52.8853	0.056021	878.611
	6.004	100.09	52.8294	0.0564033	919.695
	6.004	150.085	52.8294	0.0564047	919.69
	6.004	200.08	52.8294	0.0564045	919.677
	6.004	250.075	52.8294	0.056402	919.681
	6.004	300.07	52.8294	0.0564048	919.686
	6.004	350.065	52.8294	0.0564049	919.682
	6.004	400.06	52.8294	0.0564021	919.679
	6.004	450.055	52.8294	0.0564043	919.694
	6.004	500.05	52.8294	0.0564025	919.676
	6.004	550.045	52.8294	0.0564038	919.695
	6.004	600.04	52.8294	0.0564024	919.693
	6.004	650.035	52.8294	0.056403	919.674
	6.004	700.03	52.8294	0.0564023	919.677
	6.004	750.025	52.8294	0.0564049	919.686
	6.004	800.02	52.8294	0.0564025	919.676
	6.004	850.015	52.8294	0.0564027	919.675
	6.004	900.01	52.8294	0.0564045	919.687
	6.004	950.005	52.8294	0.0564049	919.684
	6.004	1000	52.8294	0.0564048	919.681
	6.5035	50.095	52.8332	0.0564041	930.906
	6.5035	100.09	52.8294	0.0564034	919.696
	6.5035	150.085	52.8294	0.0564018	919.68
	6.5035	200.08	52.8294	0.0564026	919.674
	6.5035	250.075	52.8294	0.0564028	919.673
	6.5035	300.07	52.8294	0.0564025	919.674
	6.5035	350.065	52.8294	0.0564047	919.69
	6.5035	400.06	52.8294	0.0564049	919.684
	6.5035	450.055	52.8294	0.0564018	919.68
	6.5035	500.05	52.8294	0.0564033	919.696
	6.5035	550.045	52.8294	0.0564031	919.673
	6.5035	600.04	52.8294	0.056404	919.694
	6.5035	650.035	52.8294	0.0564029	919.695
	6.5035	700.03	52.8294	0.0564049	919.687
	6.5035	750.025	52.8294	0.0564049	919.683
	6.5035	800.02	52.8294	0.0564018	919.679
	6.5035	850.015	52.8294	0.0564049	919.685
	6.5035	900.01	52.8294	0.0564049	919.682
	6.5035	950.005	52.8294	0.0564019	919.678
	6.5035	1000	52.8294	0.0564046	919.688
	7.003	50.095	52.9424	0.0561629	982.812
	7.003	100.09	52.8294	0.0564041	919.674
	7.003	150.085	52.8294	0.0564014	919.683
	7.003	200.08	52.8294	0.0564014	919.683
	7.003	250.075	52.8294	0.0564021	919.695
	7.003	300.07	52.8294	0.0564031	919.696
	7.003	350.065	52.8294	0.0564016	919.68
	7.003	400.06	52.8294	0.056403	919.697
	7.003	450.055	52.8294	0.0564046	919.677
	7.003	500.05	52.8294	0.0564044	919.694
	7.003	550.045	52.8294	0.0564039	919.673
	7.003	600.04	52.8294	0.0564017	919.691
	7.003	650.035	52.8294	0.0564048	919.681
	7.003	700.03	52.8294	0.0564037	919.695
	7.003	750.025	52.8294	0.0564046	919.677
	7.003	800.02	52.8294	0.056402	919.676
	7.003	850.015	52.8294	0.0564025	919.673
	7.003	900.01	52.8294	0.056402	919.694
	7.003	950.005	52.8294	0.0564036	919.672
	7.003	1000	52.8294	0.0564048	919.679
	7.5025	50.095	52.8294	0.0564049	919.682
	7.5025	100.09	52.8294	0.0564026	919.672
	7.5025	150.085	52.8294	0.0564025	919.671
	7.5025	200.08	52.8294	0.0564011	919.684
	7.5025	250.075	52.8294	0.0564033	919.671
	7.5025	300.07	52.8294	0.0564018	919.674
	7.5025	350.065	52.8294	0.0564049	919.684
	7.5025	400.06	52.8294	0.0564023	919.672
	7.5025	450.055	52.8294	0.0564028	919.698
	7.5025	500.05	52.8294	0.0564029	919.698
	7.5025	550.045	52.8294	0.0564043	919.674
	7.5025	600.04	52.8294	0.0564049	919.687
	7.5025	650.035	52.8294	0.0564027	919.671
	7.5025	700.03	52.8294	0.0564024	919.672
	7.5025	750.025	52.8294	0.0564044	919.675
	7.5025	800.02	52.8294	0.056403	919.671
	7.5025	850.015	52.8294	0.0564013	919.679
	7.5025	900.01	52.8294	0.0564013	919.689
	7.5025	950.005	52.8294	0.0564029	919.698
	7.5025	1000	52.8294	0.0564048	919.68
	8.002	50.095	52.8294	0.0564025	919.67
	8.002	100.09	52.8294	0.0564049	919.687
	8.002	150.085	52.8307	0.0564029	913.235
	8.002	200.08	52.8294	0.0564013	919.693
	8.002	250.075	52.8294	0.0564049	919.684
	8.002	300.07	52.8294	0.0564043	919.674
	8.002	350.065	52.8294	0.0564048	919.688
	8.002	400.06	52.8294	0.0564047	919.677
	8.002	450.055	52.8294	0.0564048	919.681
	8.002	500.05	52.8294	0.0564015	919.695
	8.002	550.045	52.8294	0.056403	919.67
	8.002	600.04	52.8294	0.0564012	919.677
	8.002	650.035	52.8294	0.0564049	919.684
	8.002	700.03	52.8294	0.0564043	919.674
	8.002	750.025	52.8294	0.0564009	919.683
	8.002	800.02	52.8294	0.0564048	919.689
	8.002	850.015	52.8294	0.0564028	919.67
	8.002	900.01	52.8294	0.0564016	919.696
	8.002	950.005	52.8294	0.0564037	919.671
	8.002	1000	52.8294	0.0564043	919.695
	8.5015	50.095	52.8294	0.0564048	919.69
	8.5015	100.09	52.8294	0.056402	919.698
	8.5015	150.085	52.8294	0.0564011	919.675
	8.5015	200.08	52.8294	0.0564035	919.693
	8.5015	250.075	52.8294	0.0564024	919.673
	8.5015	300.07	52.8294	0.0564049	919.685
	8.5015	350.065	52.8294	0.056404	919.672
	8.5015	400.06	52.8294	0.0564012	919.695
	8.5015	450.055	52.8294	0.0564047	919.691
	8.5015	500.05	52.8294	0.0564049	919.682
	8.5015	550.045	52.8294	0.0564022	919.67
	8.5015	600.04	52.8294	0.0564019	919.699
	8.5015	650.035	52.8294	0.0564007	919.689
	8.5015	700.03	52.8294	0.0564011	919.675
	8.5015	750.025	52.8294	0.0564009	919.692
	8.5015	800.02	52.8294	0.0564022	919.699
	8.5015	850.015	52.8294	0.0564008	919.678
	8.5015	900.01	52.8294	0.0564014	919.696
	8.5015	950.005	52.8294	0.0564033	919.699
	8.5015	1000	52.8294	0.0564049	919.682
	9.001	50.095	52.8294	0.0564006	919.678
	9.001	100.09	52.8294	0.0564011	919.686
	9.001	150.085	52.8294	0.0564028	919.701
	9.001	200.08	52.8294	0.0564008	919.693
	9.001	250.075	52.8294	0.0564048	919.69
	9.001	300.07	52.8294	0.056404	919.698
	9.001	350.065	52.8294	0.0564045	919.693
	9.001	400.06	52.8294	0.0564006	919.678
	9.001	450.055	52.8294	0.0564047	919.692
	9.001	500.05	52.8294	0.0564007	919.677
	9.001	550.045	52.8294	0.0564042	919.697
	9.001	600.04	52.8294	0.0564028	919.701
	9.001	650.035	52.8294	0.0564047	919.677
	9.001	700.03	52.8294	0.0564047	919.691
	9.001	750.025	52.8294	0.0564018	919.669
	9.001	800.02	52.8294	0.0564022	919.668
	9.001	850.015	52.8294	0.0564049	919.681
	9.001	900.01	52.8294	0.0564013	919.698
	9.001	950.005	52.8294	0.0564006	919.69
	9.001	1000	52.8294	0.0564049	919.682
	9.5005	50.095	52.8294	0.0564003	919.691
	9.5005	100.09	52.8294	0.0564011	919.675
	9.5005	150.085	52.8294	0.0564002	919.681
	9.5005	200.08	52.8294	0.0564038	919.67
	9.5005	250.075	52.8294	0.0564021	919.668
	9.5005	300.07	52.8294	0.0564048	919.689
	9.5005	350.065	52.8294	0.0564049	919.681
	9.5005	400.06	52.8294	0.0564002	919.682
	9.5005	450.055	52.8294	0.0564046	919.693
	9.5005	500.05	52.8294	0.0564002	919.683
	9.5005	550.045	52.8294	0.0564036	919.669
	9.5005	600.04	52.8294	0.0564023	919.667
	9.5005	650.035	52.8294	0.0564018	919.701
	9.5005	700.03	52.8294	0.0564003	919.691
	9.5005	750.025	52.8294	0.0564019	919.668
	9.5005	800.02	52.8294	0.056401	919.698
	9.5005	850.015	52.8294	0.0564007	919.691
	9.5005	900.01	52.8294	0.0564029	919.667
	9.5005	950.005	52.8294	0.0564025	919.702
	9.5005	1000	52.8294	0.056402	919.701
	10	50.095	52.8294	0.0564008	919.698
	10	100.09	52.8294	0.0564022	919.666
	10	150.085	52.8294	0.0564029	919.667
	10	200.08	52.8294	0.0564025	919.703
	10	250.075	52.8294	0.0564019	919.667
	10	300.07	52.8294	0.0564011	919.669
	10	350.065	52.8294	0.0564036	919.698
	10	400.06	52.8294	0.0564045	919.69
	10	450.055	52.8294	0.0564045	919.674
	10	500.05	52.8294	0.0564005	919.696
	10	550.045	52.8294	0.0564045	919.695
	10	600.04	52.8294	0.0564017	919.667
	10	650.035	52.8294	0.0563999	919.682
	10	700.03	52.8294	0.0564	919.685
	10	750.025	52.8294	0.0564019	919.702
	10	800.02	52.8294	0.0563999	919.683
	10	850.015	52.8294	0.0564017	919.677
	10	900.01	52.8294	0.0564011	919.7
	10	950.005	52.8294	0.0564049	919.688
	10	1000	52.8294	0.0564048	919.68

## Sheet: Red_Pet1
Non-modified Redlich-Peterson multicomponent isotherm																		19														33
Daten																Model										MPSD
P					Red-Pet			Si					Red-Pet			P					Si							P	P	Si	Si
c0	ce	qe	ce	qe	A	b	beta	c0	ce	qe	ce	qe	A	b	beta	ce	qe	A	b	beta	A	b	beta	ce	qe			(q,exp-q,cal)/qexp^2		(q,exp-q,cal)/qexp^2
mg/L	µmol/L	µmol/g	mg/L	mg/g				µmol/L	µmol/L	µmol/g	mg/L	mg/g														nm	np		MPSD		MPSD	MPSD,komp
4.973	115.194	335.006	3.571	10.3852	500	30.3	0.95	9.23	312.456	118.624	8.78	3.33333	60	4.7	0.65	3.571	14.6567	500	30.3	0.95	60	4.7	0.65	8.78	4.32437	33	0	0.169176	0.216191	0.0883932	0.848719	106.491
4.973	70.5806	332.736	2.188	10.3148				9.23	298.007	112.825	8.374	3.17037				2.188	13.1084							8.374	6.02027			0.0733489		0.80805
4.973	29.5161	290.896	0.915	9.01778				9.23	261.423	148.992	7.346	4.18667				0.915	9.93955							7.346	9.57586			0.0104485		1.65696
4.973	6.70968	243.984	0.208	7.56349				9.23	218.221	174.999	6.132	4.91746				0.208	4.5033							6.132	15.9313			0.163702		5.01642
5.102	115.548	363.202	3.582	11.2593				13.99	477.224	152.893	13.41	4.2963				3.582	13.9669							13.41	6.27456			0.0578292		0.212021
5.102	73.2903	338.112	2.272	10.4815				13.99	442.705	204.297	12.44	5.74074				2.272	12.4467							12.44	8.178			0.0351535		0.180246
5.102	31.2903	296.201	0.97	9.18222				13.99	393.95	230.921	11.07	6.48889				0.97	9.17449							11.07	12.5643			7.08794e-07		0.876626
5.102	9.83871	245.622	0.305	7.61429				13.99	332.633	262.272	9.347	7.36984				0.305	4.93538							9.347	18.1499			0.123782		2.13957
5.116	109.226	413.381	3.386	12.8148				9.197	312.918	106.498	8.793	2.99259				3.386	14.4903							8.793	4.51554			0.0170954		0.258986
5.116	66.1613	366.189	2.051	11.3519				9.197	296.512	114.011	8.332	3.2037				2.051	12.8834							8.332	6.28049			0.0182013		0.92234
5.116	26.0645	308.817	0.808	9.57333				9.197	264.057	140.53	7.42	3.94889				0.808	9.38719							7.42	10.3445			0.000378067		2.62309
5.116	6.70968	251.306	0.208	7.79048				9.197	215.196	177.936	6.047	5				0.208	4.53037							6.047	15.8049			0.17512		4.66981
5.107	114.548	371.804	3.551	11.5259				14.05	474.377	189.798	13.33	5.33333				3.551	13.9478							13.33	6.28298			0.0441515		0.0317052
5.107	72.6129	341.219	2.251	10.5778				14.05	446.619	197.707	12.55	5.55556				2.251	12.3916							12.55	8.29041			0.0294028		0.242334
5.107	32.0323	294.91	0.993	9.14222				14.05	394.306	234.875	11.08	6.6				0.993	9.27347							11.08	12.4169			0.000206114		0.776783
5.107	9.22581	246.851	0.286	7.65238				14.05	333.132	264.87	9.361	7.44286				0.286	4.71362							9.361	18.5137			0.147481		2.21248
4.864	116.032	302.748	3.597	9.38519				21.97	740.569	305.786	20.81	8.59259				3.597	13.1243							20.81	9.11145			0.158724		0.0036463
4.864	81.3871	279.689	2.523	8.67037				21.97	688.256	346.646	19.34	9.74074				2.523	11.876							19.34	10.9242			0.136694		0.0147618
4.864	47.2903	243.584	1.466	7.55111				21.97	620.641	358.244	17.44	10.0667				1.466	9.81055							17.44	14.0051			0.0895324		0.153067
4.864	16.5161	222.837	0.512	6.90794				21.97	543.772	377.902	15.28	10.619				0.512	5.72746							15.28	20.5115			0.0292022		0.86783
133.63	133.629	591.935	4.1425	18.35				0	0	0	0	0				4.1425	17.5668							0	0			0.00182191
133.63	109.952	550.255	3.4085	17.0579				0	0	0	0	0				3.4085	17.3663							0	0			0.00032689
133.63	81.3548	524.946	2.522	16.2733				0	0	0	0	0				2.522	17.0492							0	0			0.00227283
133.63	54.8871	460.732	1.7015	14.2827				0	0	0	0	0				1.7015	16.6151							0	0			0.0266682
133.63	13.8387	403.431	0.429	12.5063				0	0	0	0	0				0.429	14.7316							0	0			0.0316588
0	0	0	0	0				374.99	335.27	993.099	9.42109	27.9061				0	0							9.42109	26.6686					0.00196644
0	0	0	0	0				374.99	302.395	907.487	8.49731	25.5004				0	0							8.49731	25.6386					2.93677e-05
0	0	0	0	0				374.99	258.781	871.598	7.27175	24.4919				0	0							7.27175	24.149					0.00019608
0	0	0	0	0				374.99	222.208	763.933	6.24403	21.4665				0	0							6.24403	22.7637					0.00365143
0	0	0	0	0				374.99	163.416	634.734	4.04	19.492				0	0							4.04	19.1653					0.000280914
0	0	0	0	0				374.99	121.158	507.672	2.89	15.2947				0	0							2.89	16.7233					0.00872526
0	0	0	0	0				374.99	57.5136	476.221	1.62	13.376				0	0							1.62	13.0802					0.000488948
0	0	0	0	0				374.99	29.0538	345.94	0.816412	9.72092				0	0							0.816412	9.56836					0.000246319

[truncated: 3 more sheets: Red_Pet2, RetPet2batch, IAST]
